1 **Castration delays epigenetic aging and feminises DNA methylation at**  
2 **androgen-regulated loci**

3 Sugrue, VJ<sup>1</sup>; Zoller, JA<sup>2</sup>; Narayan, P<sup>3</sup>; Lu, AT<sup>4</sup>; Ortega-Recalde, OJ<sup>1</sup>, Grant, MJ<sup>3</sup>; Bawden,  
4 CS<sup>5</sup>; Rudiger, SR<sup>5</sup>; Haghani, A<sup>4</sup>; Bond, DM<sup>1</sup>; Garratt, M<sup>1</sup>; Sears, KE<sup>6</sup>; Wang, N<sup>7</sup>; Yang,  
5 XW<sup>7,8</sup>; Snell, RG<sup>3</sup>; Hore, TA<sup>1\*</sup>; Horvath, S<sup>4\*</sup>.

6  
7 **Author Affiliations**

8 <sup>1</sup>Department of Anatomy, University of Otago, Dunedin, 9016, New Zealand

9 <sup>2</sup>Department of Biostatistics, Fielding School of Public Health, University of California Los  
10 Angeles, Los Angeles, California, USA

11 <sup>3</sup>Applied Translational Genetics Group, School of Biological Sciences, Centre for Brain  
12 Research, The University of Auckland, Auckland, 1010, New Zealand

13 <sup>4</sup>Department of Human Genetics, David Geffen School of Medicine, University of California  
14 Los Angeles, Los Angeles, CA 90095, USA

15 <sup>5</sup>Livestock and Farming Systems, South Australian Research and Development Institute,  
16 Roseworthy, South Australia 5371, Australia

17 <sup>6</sup>Department of Ecology and Evolutionary Biology, UCLA, Los Angeles, CA, USA

18 <sup>7</sup>Center for Neurobehavioral Genetics, Semel Institute for Neuroscience and Human  
19 Behavior, University of California, Los Angeles (UCLA), Los Angeles, CA 90095, USA

20 <sup>8</sup>Department of Psychiatry and Biobehavioral Sciences, David Geffen School of Medicine at  
21 UCLA, Los Angeles, CA 90095, USA

22

23 \*co-senior, co-corresponding author [tim.hore@otago.ac.nz](mailto:tim.hore@otago.ac.nz), [shorvath@mednet.ucla.edu](mailto:shorvath@mednet.ucla.edu)

24

25 **Emails:**

26 Victoria J. Sugrue [victoria.sugrue@postgrad.otago.ac.nz](mailto:victoria.sugrue@postgrad.otago.ac.nz)

27 Joseph A. Zoller [jaz18@g.ucla.edu](mailto:jaz18@g.ucla.edu)

28 Pritika Narayan [p.narayan@auckland.ac.nz](mailto:p.narayan@auckland.ac.nz)

29 Ake T. Lu [akekaikailu@gmail.com](mailto:akekaikailu@gmail.com)

30 Oscar J. Ortega-Recalde [oscar.ortega.recalde@postgrad.otago.ac.nz](mailto:oscar.ortega.recalde@postgrad.otago.ac.nz)

31 Matthew J. Grant [matthew.grant@auckland.ac.nz](mailto:matthew.grant@auckland.ac.nz)

32 C. Simon Bawden [simon.bawden@sa.gov.au](mailto:simon.bawden@sa.gov.au)

33 Skye R. Rudiger [skye.rudiger@sa.gov.au](mailto:skye.rudiger@sa.gov.au)

34 Amin Haghani ahaghani@g.ucla.edu  
35 Donna M. Bond donna.bond@otago.ac.nz  
36 Mike Garratt mike.garratt@otago.ac.nz  
37 Karen E. Sears ksears@ucla.edu  
38 Nan Wang nwang@mednet.ucla.edu  
39 X. William Yang xwyang@mednet.ucla.edu  
40 Russell G. Snell r.snell@auckland.ac.nz  
41 Timothy A. Hore tim.hore@otago.ac.nz  
42 Steve Horvath shorvath@mednet.ucla.edu

43

#### 44 **Keywords**

45 Castration; epigenetic clock; epigenetics; DNA methylation; aging/ageing; biomarker of  
46 aging; androgens;

47

#### 48 **Acknowledgements**

49 We thank Ari Samaranayaka for his guidance with portions of the statistical analyses.

50

#### 51 **Author contribution statement**

52 SH and TAH conceived, funded and provided oversight for the project. VJS, JAZ, ATL, AH,  
53 OO, MG, TAH and SH analysed the data. VJS prepared the figures and wrote the manuscript  
54 draft, with contributions from all authors. TAH, DMB and VJS sourced and purified DNA  
55 from sheep ear punch tissue, with PN, MJG, CSB, SRR, RGS sourcing and purifying DNA  
56 from sheep blood. KES, NW, XWY and SH provided epigenetic aging data from mouse.

57

#### 58 **Competing interests**

59 SH is a founder of the non-profit Epigenetic Clock Development Foundation which plans to  
60 license several patents from his employer UC Regents. These patents list SH as inventor.  
61 TAH and DMB are a shareholders and directors of Totovision Ltd, a small agricultural and  
62 biotechnology consultancy. The other authors declare no conflicts of interest.

63

64 **SUMMARY**

65 In mammals, females generally live longer than males. Nevertheless, the mechanisms  
66 underpinning sex-dependent longevity are currently unclear. Epigenetic clocks are powerful  
67 biological biomarkers capable of precisely estimating chronological age using only DNA  
68 methylation data. These clocks have been used to identify novel factors influencing the aging  
69 rate, but few studies have examined the performance of epigenetic clocks in divergent  
70 mammalian species. In this study, we developed the first epigenetic clock for domesticated  
71 sheep (*Ovis aries*), and using 185 CpG sites can predict chronological age with a median  
72 absolute error of 5.1 months from ear punch and blood samples. We have discovered that  
73 castrated male sheep have a decelerated aging rate compared to intact males, mediated at  
74 least in part by the removal of androgens. Furthermore, we identified several androgen-  
75 sensitive CpG dinucleotides that become progressively hypomethylated with age in intact  
76 males, but remain stable in castrated males and females. Many of these androgen sensitive  
77 demethylating sites are regulatory in nature and located in genes with known androgen-  
78 dependent regulation, such as *MKLNI*, *LMO4* and *FNI*. Comparable sex-specific methylation  
79 differences in *MKLNI* also exist in mouse muscle ( $p=0.003$ ) but not blood, indicating that  
80 androgen dependent demethylation exists in multiple mammalian groups, in a tissue-specific  
81 manner. In characterising these sites, we identify biologically plausible mechanisms  
82 explaining how androgens drive male-accelerated aging.

83 **INTRODUCTION**

84 Age has a profound effect on DNA methylation in many tissues and cell types (Horvath,  
85 2013; Issa, 2014; Rakyan et al., 2010; Teschendorff et al., 2010). When highly correlated  
86 age-dependent sites are used as a model through the use of a tool known as the epigenetic  
87 clock, exceptionally precise estimates of chronological age (termed “DNAm age” or  
88 “epigenetic age”) can be achieved using only purified DNA as an input (Hannum et al., 2013;  
89 Horvath, 2013; Horvath and Raj, 2018; Levine et al., 2018). For example, despite being one  
90 the earliest epigenetic clocks constructed, Horvath’s 353 CpG site clock is capable of  
91 estimating chronological age with a median absolute error (MAE) of 3.6 years and an age  
92 correlation of 0.96, irrespective of tissue or cell type (Horvath, 2013). Estimates generated by  
93 this and related epigenetic clocks are not only predictive of chronological age but also  
94 biological age, allowing identification of pathologies as well as novel genetic and  
95 environmental factors that accelerate or slow biological aging. For example, irrespective of  
96 ethnic background, females and exceptionally long-lived individuals are found to have  
97 reduced epigenetic aging compared to males and other controls (Horvath et al., 2015, 2016).

98

99 Lifespan in mammals (including humans) is highly dependent upon an individual’s sex,  
100 whereby females generally possess a longevity advantage over males (Lemaître et al., 2020).  
101 Despite being a fundamental risk factor affecting age-related pathologies, the mechanistic  
102 basis of how sex influences aging is relatively unexplored. Perhaps not surprisingly, sex  
103 hormones are predicted to play a central role, with both androgens and estrogens thought to  
104 influence aspects of the aging process (Horstman et al., 2012). Castration has been shown to  
105 extend the lifespan of laboratory rodents (Asdell et al., 1967), as well as domesticated cats  
106 (Hamilton, 1974) and dogs (Hoffman et al., 2013). Castration has also been associated with  
107 longer lifespans in historical survival reports of 14<sup>th</sup>-20<sup>th</sup> century Korean eunuchs (Min et al.,  
108 2012) and men housed in US mental institutions in the 20<sup>th</sup> century (Hamilton and Mestler,  
109 1969), although not in castrato opera singers, somewhat common in the 15<sup>th</sup>-19<sup>th</sup> centuries  
110 (Nieschlag et al., 1993). Conversely, estrogen production appears to have some protective  
111 effect on aging in females, with ovariectomised mice having a shortened lifespan (Benedusi  
112 et al., 2015) and replacement of ovaries from young animals into old female mice extending  
113 lifespan (Cargill et al., 2003). Indeed, ovariectomy has been shown to accelerate the  
114 epigenetic clock (Stubbs et al., 2017), supporting predictions that estrogen production slows  
115 the intrinsic rate of aging relative to males. In humans, natural and surgical induction of  
116 menopause also hastens the pace of the epigenetic clock, while menopausal hormone therapy

117 decreases epigenetic aging as observed in buccal cell samples (Levine et al., 2016). Female  
118 breast tissue sourced DNA used for epigenetic clock calculation has been found to be  
119 substantially older as determined by this method than any other sources of DNA (Horvath,  
120 2013; Sehl et al., 2017), further indicating a link between sex hormones and epigenetic aging.  
121 However, the effects of castration and/or testosterone production on the epigenetic predictors  
122 of aging in males remained unknown in either humans or animal models prior to the current  
123 study.

124

125 Domesticated sheep (*Ovis aries*) represent a valuable, albeit underappreciated, large animal  
126 model for human disease and share with humans more similar anatomy, physiology, body  
127 size, genetics, and reproductive lifestyle as compared with commonly studied rodents  
128 (Pinnapureddy et al., 2015). With respect to aging, sheep exhibit a remarkable female-  
129 specific lifespan advantage (Lemaître et al., 2020), and Soay sheep of the Outer Hebrides  
130 represent a cornerstone research paradigm for longevity in wild mammal populations (Jewell,  
131 1997). Moreover, sheep are extensively farmed (and males castrated) in many countries,  
132 allowing incidental study of the effect of sex and sex hormones in aging to occur without  
133 increasing experimental animal use (Russell and Burch, 1959).

134

135 Here we present the first sheep epigenetic clock and quantify its median error to 5.1 months,  
136 ~3.5-4.2 % of their expected lifespan. Significantly, we found not only that castration affects  
137 the epigenome, but that the methylomes of castrated male sheep show reduced epigenetic  
138 aging compared to intact male and female counterparts, a result consistent with the increased  
139 longevity of castrated Soay sheep (Jewell, 1997). Many genomic regions and associated  
140 genes with differential age association between castrated and intact males were identified,  
141 some of which are known to be regulated or bound by androgen receptor (AR) in humans.  
142 Taken together, these findings provide a credible mechanistic link between levels of sex  
143 hormones and sex-dependent aging.

144 **METHODS**

145

146 ***DNA extraction and quantitation***

147 Sheep DNA samples for this study were derived from two distinct tissues from two strains:

148 ear tissue from New Zealand Merino, and blood from South Australian Merino.

149

150 ***Sheep ear DNA source***

151 Ear tissue was obtained from females and both intact and castrated male Merino sheep during  
152 routine on-farm ear tagging procedures in Central Otago, New Zealand. As a small piece of  
153 tissue is removed during the ear tagging process that is usually discarded by the farmer, we  
154 were able to source tissue and record the year of birth without altering animal experience, in  
155 accordance with the New Zealand Animal Welfare Act (1999) and the National Animal  
156 Ethics Advisory Committee (NAEAC) Occasional Paper No 2 (Carsons, 1998). The exact  
157 date of birth for each sheep is unknown, however, this was estimated to be the 18th of  
158 October each year, according to the date at which rams were put out with ewes (May 10th of  
159 each year), a predicted mean latency until mating of 12 days, and the mean gestation period  
160 from a range of sheep breeds (149 days) (Fogarty et al., 2005). Castration was performed by  
161 the farmer using the rubber ring method within approximately 5-50 days from birth as per  
162 conventional farming practice (National Animal Welfare Advisory Committee, 2018). Mass of  
163 yearlings was recorded by the farmer for both castrated and intact male sheep at 6.5 months  
164 of age, as a part of routine growth assessment. In total, ear tissue from 138 female sheep aged  
165 1 month to 9.1 years and 126 male sheep (63 intact, 63 castrates) aged 6 months to 5.8 years  
166 was collected and subjected to DNA extraction (Figure 1A).

167

168 DNA was extracted from ear punch tissue using a Bio-On-Magnetic-Beads (BOMB) protocol  
169 (Oberacker et al., 2019) which isolates DNA molecules using solid-phase reversible  
170 immobilisation (SPRI) beads. Approximately 3 mm punches of ear tissue were lysed in 200  
171  $\mu$ L TNES buffer (100 mM Tris, 25 mM NaCl, 10 mM EDTA, 10% w/v SDS), supplemented  
172 with 5  $\mu$ L 20 mg/mL Proteinase K and 2  $\mu$ L RNase A and incubated overnight at 55 °C as  
173 per BOMB protocols. The remainder of the protocol was appropriately scaled to maximise  
174 DNA output while maintaining the necessary 2:3:4 ratio of beads:lysate:isopropanol. As  
175 such, 40  $\mu$ L cell lysate, 80  $\mu$ L 1.5X GITC (guanidinium thiocyanate), 40  $\mu$ L TE-diluted Sera-  
176 Mag Magnetic SpeedBeads (GE Healthcare, GEHE45152105050250) and 80  $\mu$ L isopropanol  
177 were combined. After allowing DNA to bind the SPRI beads, tubes were placed on a

178 neodymium magnetic rack for ~5 minutes until the solution clarified and supernatant was  
179 removed. Beads were washed 1x with isopropanol and 2x with 70% ethanol, and then left to  
180 air dry on the magnetic rack. 25  $\mu$ L of MilliQ H<sub>2</sub>O was added to resuspend beads, and tubes  
181 were removed from the rack to allow DNA elution. Tubes were once again set onto the  
182 magnets, and the clarified solution (containing DNA) was collected.

183

184 DNA was quantified using the Quant-iT PicoGreen dsDNA assay kit (ThermoFisher  
185 Scientific, cat # P11496). 1  $\mu$ L DNA sample was added to 14  $\mu$ L TE diluted PicoGreen in  
186 MicroAmp optical 96-well plates (ThermoFisher Scientific, cat #N8010560) as per  
187 manufacturer directions, sealed, and placed into a QuantStudio qPCR machine for analysis.  
188 Samples with DNA content greater than the target quantity of 25 ng/ $\mu$ L were diluted with  
189 MilliQ.

190

#### 191 *Sheep blood DNA source*

192 DNA methylation was analysed in DNA extracted from the blood of 153 South Australian  
193 Merino sheep samples (80 transgenic Huntington's disease model sheep (OVT73 line)  
194 (Jacobsen et al., 2010) and 73 age-matched controls) aged from 2.9 to 7.0 years (Figure 1A).  
195 All protocols involving OVT73 sheep were approved by the Primary Industries and Regions  
196 South Australia (PIRSA, Approval number 19/02) Animal Ethics Committee with oversight  
197 from the University of Auckland Animal Ethics Committee. The epigenetic age of the  
198 transgenic sheep carrying the *HTT* gene was not significantly different from controls ( $p=0.30$ ,  
199 Mann-Whitney U test), therefore the data derived from these animals was subsequently  
200 treated as one dataset (Figure S1).

201

202 300  $\mu$ L thawed blood samples were treated with 2 rounds of red cell lysis buffer (300 mM  
203 Sucrose, 5 mM MgCl<sub>2</sub>, 10 mM Tris pH8, 1% Triton X-100) for 10 minutes on ice, 10 minute  
204 centrifugation at 1,800 RCF, and supernatant removed between each buffer treatment. The  
205 resulting cell pellet was incubated in cell digestion buffer (2.4 mM EDTA, 75 mM NaCl, 0.5  
206 % SDS) and Proteinase K (500  $\mu$ g/ml) at 50 °C for two hours. Phenol:Chloroform:Isoamyl  
207 alcohol (PCI, 25:24:1; pH8) was added at equal volumes, mixed by inversion, and placed in  
208 the centrifuge for 5 minutes at 14,000 RPM at room temperature (repeated if necessary). The  
209 supernatant was collected and combined with 100% ethanol at 2x volume, allowing  
210 precipitation of DNA. Ethanol was removed and evaporated, and 50  $\mu$ L TE buffer (pH8) was

211 added to resuspend genomic DNA. DNA sample concentration was initially quantified using  
212 a nanodrop, followed by Qubit.

213

#### 214 ***Data processing and clock construction***

215 A custom Illumina methylation array (“HorvathMammalMethyl40”) was used to measure  
216 DNA methylation. These arrays include 36k CpG sites conserved across mammalian species,  
217 though not all probes are expected to map to every species. Using QuasR (Gaidatzis et al.,  
218 2015), 33,136 probes were assigned genomic coordinates for sheep genome assembly  
219 OviAri4.

220 Raw .idat files were processed using the *minfi* package for RStudio (v3.6.0) with *noob*  
221 background correction (Aryee et al., 2014; Triche Jr et al., 2013). This generates normalised  
222 beta values which represent the methylation levels at probes on a scale between 0  
223 (completely unmethylated) and 1 (fully methylated).

224

225 185 CpG sites were selected for the sheep epigenetic clock by elastic net regression using the  
226 RStudio package *glmnet* (Friedman et al., 2009). The elastic net is a penalized regression  
227 model which combines aspects of both ridge and lasso regression to select a subset of CpGs  
228 that are most predictive of chronological age. 88 and 97 of these sites correlated positively  
229 and negative with age, respectively. Epigenetic age acceleration was defined as residual  
230 resulting from regressing DNAm age on chronological age. By definition, epigenetic age  
231 acceleration has zero correlation with chronological age. Statistical significance of the  
232 difference in epigenetic age acceleration between each male group (castrated versus intact)  
233 was determined using a non-parametric two-tailed Mann-Whitney U test applied to sexually  
234 mature sheep only (> 18 months of age).

235

236 The human & sheep dual-species clock was created by combining our sheep blood and ear  
237 sourced data with human methylation data previously measured using the same methylation  
238 array (“HorvathMammalMethyl40”) (Horvath et al., 2020). This data comprises 1,848 human  
239 samples aged 0 to 93 years and includes 16 different tissues. The clock was constructed  
240 identically to the sheep only clock, with an additional age parameter *relative age* defined as  
241 the ratio of chronological age by maximum age for the respective species. The maximum age  
242 for sheep and humans was set at 22.8 years and 122.5 years, respectively, as defined in the  
243 anAge database (De Magalhães et al., 2009).

244



245 ***Identification of age-associated and androgen-sensitive DMPs***

246 Age-associated differentially methylated probes (DMPs) were identified using the weighted  
247 gene co-expression network analysis (WGCNA) function *standardScreeningNumericTrait*  
248 (Langfelder and Horvath, 2008) which calculates the correlation between probe methylation  
249 and age. Where mapped, gene names for the top 500 positively correlated probes were input  
250 into DAVID (Dennis et al., 2003) for functional classification analysis with the *Ovis aries*  
251 genes present on the methylation array as background. Androgen-sensitive DMPs (asDMPs)  
252 were identified using a t-test of the difference between the slopes of linear regression lines  
253 applied to methylation levels across age in each sex. A difference in slope indicates that there  
254 is an interaction between age and sex for methylation status of a particular probe.

255

256 ***Transcription factor binding analysis***

257 Transcription factor (TF) binding at asDMPs was evaluated by entering the equivalent human  
258 probe position into the *interval search* function of the Cistrome Data Browser Toolkit, an  
259 extensive online collection of chromatin immunoprecipitation sequencing (ChIP-seq) data  
260 (Mei et al., 2016; Zheng et al., 2019). TFs binding CpGs of interest in human were analysed  
261 using a custom R script, with ChIP-seq tracks being viewed by Cistrome link in the UCSC  
262 genome browser alongside additional annotation tracks of interest for export and figure  
263 creation in Inkscape. To model the background levels of TF binding, 1000 replicates of 50  
264 random probes sites were run in a similar manner using the Cistrome Human Factor dataset,  
265 BEDtools (Quinlan and Hall, 2010) and a custom Python script.

## 266 **RESULTS**

### 267 ***DNA methylation in blood and ear throughout sheep aging***

268 To create an epigenetic clock for sheep, we purified DNA from a total of 432 sheep of the  
269 Merino breed (Figure 1A). The majority of DNA samples (262) were from ear punches  
270 sourced from commercial farms in New Zealand, with the remaining (168) blood samples  
271 from a South Australian Merino flock. DNA methylation was quantified using a custom 38K  
272 probe array consisting of CpG sites conserved amongst a wide range of mammalian species;  
273 with 33,136 of these predicted to be complementary to sheep sequences. Two ear samples  
274 from intact males were excluded by quality control measures.

275

276 To initially characterise methylation data, we performed hierarchical clustering that revealed  
277 two major clusters based on tissue source (Figure S2A). There was some sub-clustering based  
278 on sex and age; however, there was no separation based on known underlying pedigree  
279 variation. Global average CpG methylation levels in ear tissue exhibited a small progressive  
280 increase with age, though the same trend was not seen in blood (Figure S2B).

281

282 Pearson correlation coefficients ( $r$ ) describing the linear relationship between CpG  
283 methylation and chronological age ranged from -0.63 to 0.68 for all ear and blood samples  
284 (Table S1). One of the most positively correlated mapped probes was located within the  
285 promoter of fibroblast growth factor 8 (*FGF8*) (Figure 1C), a well-described developmental  
286 growth factor ( $r=0.64$ ,  $p=1.38E^{-51}$ ). Probes located within several other well-known  
287 transcription factors were also among those most highly correlated with age (*PAX6*,  $r=0.62$ ,  
288  $p=2.71E^{-47}$ ; *PAX5*,  $r=0.59$ ,  $p=5.75E^{-43}$ ; *HOXC4*,  $r=0.59$ ,  $p=4.47E^{-43}$ ). Indeed, when we  
289 performed ontogeny analysis, we found the top 500 CpGs positively correlated with age were  
290 enriched for transcription-related and DNA binding processes (Table S2), consistent with  
291 wide-spread transcriptional shifts during different life stages. Interestingly, we also found a  
292 CpG (cg18266944) in the second intron of insulin-like growth factor 1 (*IGF1*) that becomes  
293 rapidly hypomethylated following birth before levelling off post-adolescence ( $r=-0.60$ ,  
294  $p=7.43E^{-15}$ ). We considered this a particularly encouraging age-associated epigenetic signal  
295 given that IGF1 is a key determinant of growth and aging (Junnila et al., 2013; Laron, 2001).

296

### 297 ***Construction of an epigenetic clock in sheep***

298 We then established epigenetic clocks from our sheep blood and ear methylation data,  
299 respectively, as well as a combined blood and ear clock (hereafter referred to as the *multi-*

300 *tissue clock*) using a penalized regression model (elastic-net regression). In total, 185 CpG  
301 sites were included for the multi-tissue clock, which was shown to have a MAE of 5.1  
302 months and an age correlation of 0.95 when calculated using a leave-one-out cross validation  
303 (LOOCV) analysis (Figure 2A). Taking into account the expected lifespan of sheep in  
304 commercial flocks (10-12 years), the error of the multi-tissue clock is 3.5-4.2 % of the  
305 lifespan – comparable to the human skin and blood clock at ~3.5 % (Horvath et al., 2018) and  
306 the mouse multi-tissue clock at ~5 % of expected lifespan (Meer et al., 2018; Petkovich et al.,  
307 2017; Stubbs et al., 2017; Thompson et al., 2018; Wang et al., 2017).

308

309 Two human and sheep dual-species clocks were also constructed, which mutually differ by  
310 way of age measurement. One estimates the chronological ages of sheep and human (in units  
311 of years), while the other estimates the relative age – a ratio of chronological age of an  
312 animal to the maximum known lifespan of its species (defined as 22.8 years and 122.5 years  
313 for sheep and human respectively) with resulting values between 0 and 1. The measure of  
314 relative age is advantageous as it aligns the ages of human and sheep to the same scale,  
315 yielding biologically meaningful comparison between the two species. The dual-species  
316 clock for chronological age leads to a median error of 16.53 months when considering both  
317 species, or 4.74 months for sheep only (Figure 2D-E). The dual-species clock for relative age  
318 produced median errors of 0.020 of the maximum lifespans for both species (approximately  
319 2.45 years for human, or 5.4 months for sheep) and 0.021 for sheep only (approximately 5.7  
320 months) (Figure 2F-G).

321

### 322 ***Castration delays epigenetic aging in sheep***

323 To test the role of androgens in epigenetic age acceleration, we exploited the fact that  
324 castrated male Merino sheep are frequently left to age 'naturally' on New Zealand high-  
325 country farms in return for yearly wool production, in contrast to non-breeding males of other  
326 sheep varieties which are usually sold as yearlings for meat. Both castrated males and intact  
327 aged-matched controls were sourced from genetically similar flocks kept under comparable  
328 environmental conditions. Interestingly, both intact and castrated males showed equivalent  
329 epigenetic age during the juvenile years, however, once they advanced beyond the yearling  
330 stage, castrates appeared to have slowed rates of epigenetic aging (Figure 3A). Indeed, when  
331 we only considered sheep beyond 18 months of age, we found castrates had significantly  
332 reduced epigenetic age compared to intact male controls (Figure 3B,  $p=0.018$ ). While the  
333 extent of the age deceleration consistently increased with advancing age, mature castrates

334 were on average epigenetically 3.1 months 'younger' than their chronological age (Figure  
335 3B). In contrast, DNAm age of intact males was comparable to their chronological age (0.14  
336 months age decelerated), as were females (0.76 months age accelerated), who comprised the  
337 majority of the samples from which the clock was constructed. Notably, the age deceleration  
338 observed in castrates was corroborated using the human & sheep dual-species clock (Figure  
339 S3,  $p=0.04$ ).

340

341 To explore the mechanistic link between androgens and epigenetic aging, we identified  
342 probes with significant differences between the rate of age-dependent methylation changes in  
343 castrated or intact males (Table S3). We found there was a sharp inflection in  $p$  value after  
344 approximately the 50 most significant probes (Figure S4A) and thus represented a natural  
345 cut-off for analysis. A recent comparison of age-related methylation changes in the blood of  
346 human males and females revealed that almost all regions of interest appeared to be X-linked  
347 (McCartney et al., 2019). Given that there are already well characterised differences between  
348 male and female methylation patterns on the X-chromosome as a result of gene-dosage  
349 correction (Heard and Disteche, 2006), it could be argued that X-linked age-related  
350 differences may be driven by peculiarities of methylation arising from X-chromosome  
351 inactivation, as opposed to differences in androgen production *per se*. To test this for sheep,  
352 we examined the genomic location of our asDMPs, and found they are evenly distributed  
353 between individual autosomes and the sex chromosomes (Figure S4B-C).

354

355 Interestingly, we found several sites that become progressively hypomethylated in intact  
356 males with age but maintain a consistent level of methylation throughout life in castrates and  
357 females (Figure 4A-D). Indeed, of the top 50 most significantly different asDMPs, only two  
358 (cg03275335 *GAS1* and cg13296708 *TSHZ3*) exhibited alteration whereby intact males  
359 gained methylation (Figure 5A). We found that many asDMPs we identified were linked to  
360 genes known to be regulated by androgen receptor (AR) (e.g. *MKLN1*, *LMO4*, *FNI*, *TIPARP*,  
361 *ZBTB16* (Jin et al., 2013)) and as such, we were encouraged to find further mechanistic  
362 connections between asDMPs and TF regulation.

363

364 To do this, we used examined TF-binding of the human regions homologous to our asDMPs  
365 using the Cistrome Data Browser Toolkit - although Cistrome contains data from a wide-  
366 range of transcription factors, we noted AR binds to over half the asDMPs (28/50), with the  
367 top 14 most significant asDMPs all showing AR binding (Figure 5A). To ensure that this was

368 not a result expected by chance alone, we performed empirical sampling whereby 1000  
369 replicates of the identical analysis was performed but with 50 random CpG sites from the  
370 methylation array at each bootstrap replicate. The observed/expected enrichment for AR  
371 binding in our 50 asDMPs was 22-fold (23.29%/1.09%,  $p < 0.001$ ), and much higher than  
372 enrichment for any other TF. Nevertheless, there were several other interesting related TFs  
373 with high observed/expected enrichment for asDMPs, including the estrogen receptor  
374 (ESR1), the glucocorticoid receptor (NR3C1) and forkhead box A1 (FOXA1) (Figure 5B).  
375

376 While we saw similar features at other asDMPs (S5A-B), the asDMP that was the most  
377 different in epigenetic aging rate between castrates and males, *MKLNI*, stood out as being  
378 particularly interesting from a gene regulatory perspective (Figure 5C). Overlapping with this  
379 site, and AR binding, were peaks of DNase I hypersensitivity, H3K27ac histone marks as  
380 well as good vertebrate conservation compared to surrounding sequences.

381

382 ***Androgen-sensitive DMPs are present in divergent mammalian species but are tissue***  
383 ***specific***

384 To determine if the androgen-dependent methylation exists in divergent mammalian groups,  
385 we assessed methylation changes at these asDMPs in mouse tissues (blood, cerebellum,  
386 cortex, liver, muscle and striatum). Again, cg21524116 in *MKLNI* stood out - mouse muscle  
387 exhibited the same sex-specific trend in as seen in sheep, whereby females retain a constant  
388 level of high methylation was retained in females while methylation levels gradually  
389 decreased with age in males ( $p=0.003$ ) (Figure 6A). However, this same trend could not be  
390 seen in mouse (Figure 6B) or sheep blood, suggesting that this androgen-sensitivity is tissue-  
391 specific.

392

393 **DISCUSSION**

394 Epigenetic clocks are accurate molecular biomarkers for aging which have proven to be  
395 useful for identifying novel age-related mechanisms, diseases, and interventions that alter the  
396 intrinsic aging rate (Horvath and Raj, 2018). Here, we developed the first epigenetic clock for  
397 sheep and show it is capable of estimating chronological age in sheep with a MAE of 5.1  
398 months – between 3.5 % and 4.2 % of the average sheep lifespan. Significantly, we also  
399 present the first evidence that castration feminises parts of the epigenome and delays  
400 epigenetic aging.

401

402 Improved survival has previously been reported in castrated sheep compared to intact males  
403 and females, part of which was suggested to be attributed to behavioural changes such as  
404 reduced aggression (Jewell, 1997). Our data shows that castration also causes a delay in  
405 intrinsic aging as assessed by the epigenetic clock, with an average reduction in epigenetic  
406 age of 3.1 months (Figure 3B). Moreover, delayed epigenetic aging in castrates is also seen  
407 relative to intact males and females, which is consistent with castrated males outliving intact  
408 animals of both sexes (Jewell, 1997). We also find that the degree of age deceleration  
409 observed in castrated males is dependent on their chronological age. For instance, the average  
410 DNAm deceleration is increased by an additional 1.2 months when considering individuals  
411 aged beyond 2.9 years. In contrast, we saw no difference between castrated and intact males  
412 younger than 18 months. Together this implies that the effects of androgen exposure on the  
413 epigenome and aging are cumulative. Similar findings of greater age-deceleration at later  
414 chronological ages have been observed in rodent models, with long-lived calorie-restricted  
415 mice showing a younger epigenetic age relatively late in life, but similar epigenetic aging  
416 rates at younger ages (Petkovich et al., 2017).

417

418 These results support the reproductive cell-cycle theory as an explanation for sex-dependent  
419 differences in longevity of mammals (Atwood and Bowen, 2011; Bowen and Atwood, 2004).  
420 Androgens and other testicular factors may be working in an antagonistic pleiotropic manner  
421 whereby they push cells through the cell cycle and promote growth in early life to reach  
422 reproductive maturity, thus also influencing the epigenome in an age-related manner. This  
423 process, however, may become dysregulated and promote senescence at older ages, reflected  
424 in the hastening of the epigenetic clock observed in intact males compared to castrates. It is  
425 well-known in farming practise that where it can be managed appropriately, leaving male  
426 sheep intact or partially intact (i.e. cryptorchid) increases body mass (Seideman et al., 1982),

427 something we also observed in our study (Figure S6). This indicates greater rates of cell cycle  
428 progression, cellular division, and tissue hyperplasia. Under this hypothesis, the effects of  
429 castration should depend on whether animals are castrated before or after puberty. In rats,  
430 castration just after birth (i.e. prior to puberty) causes substantial lifespan extension while  
431 castration after puberty has smaller effects (Talbert and Hamilton, 1965), supporting the idea  
432 that male gonadal hormones have effects at early life stages that have deleterious  
433 consequences for survival.

434

435 Consequences of castration for increased survival and slowed epigenetic aging could also be  
436 linked to the effects of androgens on sexual dimorphism and adult reproductive investment  
437 (Brooks and Garratt, 2017). Life-history theories predict that males in highly polygynous  
438 species, like sheep, should be selected to invest heavily in reproduction early in life, even at  
439 the expense of a shorter lifespan, because they have the potential to monopolise groups of  
440 females and quickly produce many offspring (Clutton-Brock and Isvaran, 2007; Tidiere et al.,  
441 2015). By contrast, selection on females should promote a slower reproductive life strategy,  
442 because female reproductive rate is limited by the number of offspring they can produce.  
443 While we show that castration slows epigenetic aging in sheep, loss of ovarian hormone  
444 production in mice and human (through ovariectomy or menopause) is associated with a  
445 hastening of the epigenetic clock (Levine et al., 2016; Stubbs et al., 2017), consistent with the  
446 beneficial effects of female ovarian hormones on survival. Thus, it appears that both male  
447 and female sex-hormones differentially regulate the epigenetic aging process in directly  
448 opposing ways, in a manner that is consistent with the life-history strategies classically  
449 thought to be optimal for each sex.

450

451 Our results provide further insight into the mechanisms of aging and genes affected by age-  
452 associated methylation. Several well-described growth and transcription factors demonstrate  
453 a high positive age correlation; including *FGF8*, a developmental growth factor involved in  
454 embryonic brain and limb formation (Lorenzi et al., 1995; MacArthur et al., 1995). Low  
455 methylation at this site in our youngest samples may be indicative of some residual  
456 expression following birth, which is quickly silenced by post-natal hypermethylation (Figure  
457 1D). In females, genic *IGF1* methylation demonstrates the opposite trend. Methylation levels  
458 observed at position cg18266944 in intron 2 of *IGF1* are highest immediately after birth  
459 followed by rapid demethylation, consistent with an activation of the gene to promote post-  
460 natal growth (Baker et al., 1993). Given that *IGF1* and its associated mitogenic pathway is



461 one of the most widely studied molecular driver of aging, we considered this a relevant  
462 discovery warranting further exploration. Despite this site being intronic, considerable  
463 sequence conservation and its position within a DNase hypersensitivity site indicate that this  
464 locus may have some regulatory function (Figure S5C), however, it is not possible to  
465 determine if the same process occurs in males due to a lack of equivalent early life samples.  
466 Importantly, peaks of AR binding have been observed immediately upstream of the *IGF1*  
467 gene, which could suggest some transcriptional control of *IGF1* by androgens. Rising  
468 methylation levels in DNA detected by probes mapped to other well-characterised  
469 transcription factors, *PAX5*, *PAX6*, and *HOXC4*, are indicative of larger transcriptional shifts  
470 over the lifespan (Figure 1C), concordant with the results from the gene ontology analysis  
471 (Table S2).

472  
473 Comparison of intact and castrated males also allowed us to identify several age-related  
474 DMPs that display clear androgen-sensitivity (Figure 4A-D), with castrated males exhibiting  
475 a feminised methylation profile compared to intact counterparts. In contrast to similar  
476 experiments performed in humans, we found that these sex-specific CpG sites are not  
477 predominantly X-linked in sheep (McCartney et al., 2019), but are instead distributed evenly  
478 throughout the genome (Figure S4). The most striking example of age-dependent androgen-  
479 sensitive methylation loss is that detected by the probe cg21524116, mapping to *MKLNI*  
480 (Muskelin) (Figure 4A). Sex-specific methylation is also seen at this probe location in mouse  
481 muscle but in neither sheep or mouse blood (Figure 6A-B), implying that such androgen-  
482 sensitive effects in *MKLNI* and other loci may be mammalian wide but certainly not  
483 ubiquitous across all tissues. Evidence for *MKLNI* androgen-dependency has previously been  
484 presented (Jin et al., 2013) and MKLN1-containing complexes have been shown to regulate  
485 lifespan in *Caenorhabditis elegans* (Hamilton et al., 2005; Liu et al., 2019), although no links  
486 between this gene and mammalian longevity have yet been reported. CHIP-seq data  
487 demonstrates enriched AR binding at the position of this asDMP in human, as well as  
488 exhibiting high sequence conservation, DNase hypersensitivity and H3K27ac marks – the  
489 latter two of which are markers of open chromatin and indicate transcriptionally active areas  
490 (Figure 5C) (Creyghton et al., 2010; Wang et al., 2008). Taken together, this evidence  
491 implies that the site we identified in *MKLNI* is a reliable biomarker of androgen-induced  
492 aging in sheep, and it may also have some regulatory function involved in male-accelerated  
493 aging.

494



495 Similarly, many of the other highly significant asDMPs (58%) are also bound by androgen  
496 receptor (Figure 5A). When considering the TF binding compared to background levels, our  
497 data shows that particularly AR, but also ESR1, FOXA1 and NR3C1 binding are enormously  
498 enriched in our top asDMPs; all of which share biologically integrated functions. NR3C1,  
499 which encodes the glucocorticoid receptor (GR) and has been previously linked to longevity  
500 in certain populations (Olczak et al., 2019), is an anabolic steroid receptor and thus shares  
501 significant homology in its binding domain and targets many DNA sequences also bound by  
502 AR (Claessens et al., 2017). FOXA1 has been found to regulate estrogen receptor binding  
503 (Carroll et al., 2005; Hurtado et al., 2011) as well as AR and GR binding (Sahu et al., 2013)  
504 in both normal and cancer cells. Furthermore, FOXA1 aids in ESR1-mediated recruitment of  
505 GRs to estrogen receptor binding regions (Karmakar et al., 2013). Interestingly, AR agonist  
506 treatment in breast cancer models reprograms binding of both FOXA1 and ESR (Ponnusamy  
507 et al., 2019) suggesting some degree of antagonistic function between the androgen and  
508 estrogen receptors. If this is true for asDMPs in sheep, these sites may well represent a  
509 conduit through which castrates take on physiologically feminised traits, including delayed  
510 aging.

511

512 Having said this, it remains a possibility that methylation levels at these androgen-sensitive  
513 sites has very little to do with biological aging and instead only diverge as time progresses  
514 due to the period of androgen exposure or deficiency. Specifically, the changes in  
515 methylation observed between intact and castrated males may not be adaptive at all, and  
516 rather, methylation is progressively “diluted” by binding of androgen receptor to the DNA.  
517 Variable methylation at AR target genes has been reported in humans with androgen  
518 insensitivity syndrome (AIS) when compared to normal controls, supporting the notion that  
519 AR binding influences methylation at target genes (Ammerpohl et al., 2013). However, the  
520 authors noted that these methylation shifts were sporadic, which does not explain the  
521 consistent feminisation of methylation levels we observe in castrated sheep at many asDMPs.

522

523 As yet, we do not know if castration in later life would drive feminisation of methylation  
524 patterns as we observed for early life castration (Figure 4). This is however, an interesting  
525 consideration - it is possible that castration late in life would quickly recapitulate the  
526 methylation differences seen in those castrated early in life, or it may be that methylation  
527 patterns established during early growth and development are difficult to change once set on  
528 a particular aging trajectory. This distinction may be important from a functional perspective

529 because early and later-life castration can have differing effects on survival in rodents  
530 (Talbert and Hamilton, 1965). Moreover, while early-life castration has been shown to extend  
531 human lifespan, androgen depletion in elderly men can be associated with poor health  
532 (Araujo et al., 2011).

533

534 In summary, this paper describes a robust epigenetic clock for sheep that is capable of  
535 estimating chronological age, detecting accelerated rates of aging, and contributes to a  
536 growing body of work on epigenetic aging. In addition to demonstrating the utility of sheep  
537 as an excellent model for aging studies, our data identify androgen-dependent age associated  
538 methylation changes that affect known targets of sex hormone pathways and hormone  
539 binding transcription factors. While these changes may not promote aging *per se*,  
540 identification of loci with age-dependent androgen-sensitive methylation patterns uncovers  
541 novel mechanisms by which male-accelerated aging in mammals can be explained.

542 **REFERENCES**

- 543 Ammerpohl, O., Bens, S., Appari, M., Werner, R., Korn, B., Drop, S.L.S., Verheijen, F., van  
544 der Zwan, Y., Bunch, T., and Hughes, I. (2013). Androgen receptor function links human  
545 sexual dimorphism to DNA methylation. *PLoS One* 8, e73288.
- 546 Araujo, A.B., Dixon, J.M., Suarez, E.A., Murad, M.H., Guey, L.T., and Wittert, G.A. (2011).  
547 Endogenous testosterone and mortality in men: a systematic review and meta-analysis. *J.*  
548 *Clin. Endocrinol. Metab.* 96, 3007–3019.
- 549 Aryee, M.J., Jaffe, A.E., Corrada-Bravo, H., Ladd-Acosta, C., Feinberg, A.P., Hansen, K.D.,  
550 and Irizarry, R.A. (2014). Minfi: a flexible and comprehensive Bioconductor package for the  
551 analysis of Infinium DNA methylation microarrays. *Bioinformatics* 30, 1363–1369.
- 552 Asdell, S.A., Doornenbal, H., Joshi, S.R., and Sperling, G.A. (1967). The effects of sex  
553 steroid hormones upon longevity in rats. *Reproduction* 14, 113–120.
- 554 Atwood, C.S., and Bowen, R.L. (2011). The reproductive-cell cycle theory of aging: an  
555 update. *Exp. Gerontol.* 46, 100–107.
- 556 Baker, J., Liu, J.-P., Robertson, E.J., and Efstratiadis, A. (1993). Role of insulin-like growth  
557 factors in embryonic and postnatal growth. *Cell* 75, 73–82.
- 558 Benedusi, V., Martini, E., Kallikourdis, M., Villa, A., Meda, C., and Maggi, A. (2015).  
559 Ovariectomy shortens the life span of female mice. *Oncotarget* 6, 10801.
- 560 Bowen, R.L., and Atwood, C.S. (2004). Living and Dying for Sex. *Gerontology* 50, 265–290.
- 561 Brooks, R.C., and Garratt, M.G. (2017). Life history evolution, reproduction, and the origins  
562 of sex-dependent aging and longevity. *Ann. N. Y. Acad. Sci.* 1389, 92–107.
- 563 Cargill, S.L., Carey, J.R., Müller, H., and Anderson, G. (2003). Age of ovary determines  
564 remaining life expectancy in old ovariectomized mice. *Aging Cell* 2, 185–190.
- 565 Carroll, J.S., Liu, X.S., Brodsky, A.S., Li, W., Meyer, C.A., Szary, A.J., Eeckhoute, J., Shao,  
566 W., Hestermann, E. V., and Geistlinger, T.R. (2005). Chromosome-wide mapping of estrogen  
567 receptor binding reveals long-range regulation requiring the forkhead protein FoxA1. *Cell*  
568 122, 33–43.
- 569 Carsons, L. (1998). Regulation of animal use in research, testing and teaching in New  
570 Zealand - the black, the white and the grey. *Surveillance* 25, 3–5.
- 571 Claessens, F., Joniau, S., and Helsen, C. (2017). Comparing the rules of engagement of  
572 androgen and glucocorticoid receptors. *Cell. Mol. Life Sci.* 74, 2217–2228.
- 573 Clutton-Brock, T.H., and Isvaran, K. (2007). Sex differences in ageing in natural populations  
574 of vertebrates. *Proc. R. Soc. B Biol. Sci.* 274, 3097–3104.
- 575 Creighton, M.P., Cheng, A.W., Welstead, G.G., Kooistra, T., Carey, B.W., Steine, E.J.,

576 Hanna, J., Lodato, M.A., Frampton, G.M., and Sharp, P.A. (2010). Histone H3K27ac  
577 separates active from poised enhancers and predicts developmental state. *Proc. Natl. Acad.*  
578 *Sci.* *107*, 21931–21936.

579 Dennis, G., Sherman, B.T., Hosack, D.A., Yang, J., Gao, W., Lane, H.C., and Lempicki, R.A.  
580 (2003). DAVID: database for annotation, visualization, and integrated discovery. *Genome*  
581 *Biol.* *4*, R60.

582 Fogarty, N.M., Ingham, V.M., Gilmour, A.R., Cummins, L.J., Gaunt, G.M., Stafford, J.,  
583 Edwards, J.E.H., and Banks, R.G. (2005). Genetic evaluation of crossbred lamb production.  
584 1. Breed and fixed effects for birth and weaning weight of first-cross lambs, gestation length,  
585 and reproduction of base ewes. *Aust. J. Agric. Res.* *56*, 443–453.

586 Friedman, J., Hastie, T., and Tibshirani, R. (2009). glmnet: Lasso and elastic-net regularized  
587 generalized linear models. *R Packag. Version 1*.

588 Gaidatzis, D., Lerch, A., Hahne, F., and Stadler, M.B. (2015). QuasR: quantification and  
589 annotation of short reads in R. *Bioinformatics* *31*, 1130–1132.

590 Hamilton, J.B. (1974). Relationship of castration, spaying, and sex to survival and duration of  
591 life in domestic cats. *Reprod. Aging* *96*.

592 Hamilton, J.B., and Mestler, G.E. (1969). Mortality and survival: comparison of eunuchs  
593 with intact men and women in a mentally retarded population. *J. Gerontol.* *24*, 395–411.

594 Hamilton, B., Dong, Y., Shindo, M., Liu, W., Odell, I., Ruvkun, G., and Lee, S.S. (2005). A  
595 systematic RNAi screen for longevity genes in *C. elegans*. *Genes Dev.* *19*, 1544–1555.

596 Hannum, G., Guinney, J., Zhao, L., Zhang, L., Hughes, G., Sada, S., Klotzle, B., Bibikova,  
597 M., Fan, J.-B., and Gao, Y. (2013). Genome-wide methylation profiles reveal quantitative  
598 views of human aging rates. *Mol. Cell* *49*, 359–367.

599 Heard, E., and Disteché, C.M. (2006). Dosage compensation in mammals: fine-tuning the  
600 expression of the X chromosome. *Genes Dev.* *20*, 1848–1867.

601 Hoffman, J.M., Creevy, K.E., and Promislow, D.E.L. (2013). Reproductive capability is  
602 associated with lifespan and cause of death in companion dogs. *PLoS One* *8*, e61082.

603 Horstman, A.M., Dillon, E.L., Urban, R.J., and Sheffield-Moore, M. (2012). The role of  
604 androgens and estrogens on healthy aging and longevity. *Journals Gerontol. Ser. A Biomed.*  
605 *Sci. Med. Sci.* *67*, 1140–1152.

606 Horvath, S. (2013). DNA methylation age of human tissues and cell types. *Genome Biol.* *14*,  
607 3156.

608 Horvath, S., and Raj, K. (2018). DNA methylation-based biomarkers and the epigenetic clock  
609 theory of ageing. *Nat. Rev. Genet.* *19*, 371.

610 Horvath, S., Pirazzini, C., Bacalini, M.G., Gentilini, D., Di Blasio, A.M., Delledonne, M.,  
611 Mari, D., Arosio, B., Monti, D., and Passarino, G. (2015). Decreased epigenetic age of  
612 PBMCs from Italian semi-supercentenarians and their offspring. *Aging (Albany NY)* 7, 1159.  
613 Horvath, S., Gurven, M., Levine, M.E., Trumble, B.C., Kaplan, H., Allayee, H., Ritz, B.R.,  
614 Chen, B., Lu, A.T., and Rickabaugh, T.M. (2016). An epigenetic clock analysis of  
615 race/ethnicity, sex, and coronary heart disease. *Genome Biol.* 17, 171.  
616 Horvath, S., Oshima, J., Martin, G.M., Lu, A.T., Quach, A., Cohen, H., Felton, S.,  
617 Matsuyama, M., Lowe, D., and Kabacik, S. (2018). Epigenetic clock for skin and blood cells  
618 applied to Hutchinson Gilford Progeria Syndrome and ex vivo studies. *Aging (Albany NY)*  
619 10, 1758.  
620 Horvath, S., Singh, K., Raj, K., Khairnar, S., Sanghavi, A., Shrivastava, A., Zoller, J.A., Li,  
621 C.Z., Herenu, C.B., Canatelli-Mallat, M., et al. (2020). Reversing age: dual species  
622 measurement of epigenetic age with a single clock. *BioRxiv* 2020.05.07.082917.  
623 Hurtado, A., Holmes, K.A., Ross-Innes, C.S., Schmidt, D., and Carroll, J.S. (2011). FOXA1  
624 is a key determinant of estrogen receptor function and endocrine response. *Nat. Genet.* 43,  
625 27–33.  
626 Issa, J.-P. (2014). Aging and epigenetic drift: a vicious cycle. *J. Clin. Invest.* 124, 24–29.  
627 Jacobsen, J.C., Bawden, C.S., Rudiger, S.R., McLaughlan, C.J., Reid, S.J., Waldvogel, H.J.,  
628 MacDonald, M.E., Gusella, J.F., Walker, S.K., and Kelly, J.M. (2010). An ovine transgenic  
629 Huntington’s disease model. *Hum. Mol. Genet.* 19, 1873–1882.  
630 Jewell, P.A. (1997). Survival and behaviour of castrated Soay sheep (*Ovis aries*) in a feral  
631 island population on Hirta, St. Kilda, Scotland. *J. Zool.* 243, 623–636.  
632 Jin, H.J., Kim, J., and Yu, J. (2013). Androgen receptor genomic regulation. *Transl. Androl.*  
633 *Urol.* 2, 158–177.  
634 Junnila, R.K., List, E.O., Berryman, D.E., Murrey, J.W., and Kopchick, J.J. (2013). The  
635 GH/IGF-1 axis in ageing and longevity. *Nat. Rev. Endocrinol.* 9, 366.  
636 Karmakar, S., Jin, Y., and Nagaich, A.K. (2013). Interaction of Glucocorticoid Receptor  
637 (GR) with Estrogen Receptor (ER)  $\alpha$  and Activator Protein 1 (AP1) in Dexamethasone-  
638 mediated Interference of ER $\alpha$  Activity. *J. Biol. Chem.* 288, 24020.  
639 Langfelder, P., and Horvath, S. (2008). WGCNA: an R package for weighted correlation  
640 network analysis. *BMC Bioinformatics* 9, 559.  
641 Laron, Z. (2001). Insulin-like growth factor 1 (IGF-1): a growth hormone. *Mol. Pathol.* 54,  
642 311.  
643 Lemaître, J.-F., Ronget, V., Tidière, M., Allainé, D., Berger, V., Cohas, A., Colchero, F.,

644 Conde, D.A., Garratt, M., Liker, A., et al. (2020). Sex differences in adult lifespan and aging  
645 rates of mortality across wild mammals. *Proc. Natl. Acad. Sci.* *117*, 8546–8553.

646 Levine, M.E., Lu, A.T., Chen, B.H., Hernandez, D.G., Singleton, A.B., Ferrucci, L.,  
647 Bandinelli, S., Salfati, E., Manson, J.E., and Quach, A. (2016). Menopause accelerates  
648 biological aging. *Proc. Natl. Acad. Sci.* *113*, 9327–9332.

649 Levine, M.E., Lu, A.T., Quach, A., Chen, B.H., Assimes, T.L., Bandinelli, S., Hou, L.,  
650 Baccarelli, A.A., Stewart, J.D., and Li, Y. (2018). An epigenetic biomarker of aging for  
651 lifespan and healthspan. *Aging (Albany NY)* *10*, 573.

652 Liu, H., Ding, J., Köhnlein, K., Urban, N., Ori, A., Villavicencio-Lorini, P., Walentek, P.,  
653 Klotz, L.-O., Hollemann, T., and Pfirrmann, T. (2019). The GID ubiquitin ligase complex is a  
654 regulator of AMPK activity and organismal lifespan. *Autophagy* 1–17.

655 Lorenzi, M. V, Long, J.E., Miki, T., and Aaronson, S.A. (1995). Expression cloning,  
656 developmental expression and chromosomal localization of fibroblast growth factor-8.  
657 *Oncogene* *10*, 2051–2055.

658 MacArthur, C.A., Shankar, D.B., and Shackleford, G.M. (1995). Fgf-8, activated by proviral  
659 insertion, cooperates with the Wnt-1 transgene in murine mammary tumorigenesis. *J. Virol.*  
660 *69*, 2501–2507.

661 De Magalhães, J.P., Budovsky, A., Lehmann, G., Costa, J., Li, Y., Fraifeld, V., and Church,  
662 G.M. (2009). The Human Ageing Genomic Resources: online databases and tools for  
663 biogerontologists. *Aging Cell* *8*, 65–72.

664 McCartney, D.L., Zhang, F., Hillary, R.F., Zhang, Q., Stevenson, A.J., Walker, R.M.,  
665 Bermingham, M.L., Boutin, T., Morris, S.W., Campbell, A., et al. (2019). An epigenome-  
666 wide association study of sex-specific chronological ageing. *Genome Med.* *12*, 1.

667 Meer, M. V, Podolskiy, D.I., Tyshkovskiy, A., and Gladyshev, V.N. (2018). A whole lifespan  
668 mouse multi-tissue DNA methylation clock. *Elife* *7*, e40675.

669 Mei, S., Qin, Q., Wu, Q., Sun, H., Zheng, R., Zang, C., Zhu, M., Wu, J., Shi, X., and Taing,  
670 L. (2016). Cistrome Data Browser: a data portal for ChIP-Seq and chromatin accessibility  
671 data in human and mouse. *Nucleic Acids Res.* gkw983.

672 Min, K.-J., Lee, C.-K., and Park, H.-N. (2012). The lifespan of Korean eunuchs. *Curr. Biol.*  
673 *22*, R792–R793.

674 National Animal Welfare Advisory Committee, N.Z. (2018). Painful Husbandry Procedures  
675 Code of Welfare.

676 Nieschlag, E., Nieschlag, S., and Behre, H.M. (1993). Lifespan and testosterone. *Nature* *366*,  
677 215.

- 678 Oberacker, P., Stepper, P., Bond, D.M., Höhn, S., Focken, J., Meyer, V., Schelle, L., Sugrue,  
679 V.J., Jeunen, G.-J., Moser, T., et al. (2019). Bio-On-Magnetic-Beads (BOMB): Open  
680 platform for high-throughput nucleic acid extraction and manipulation. *PLoS Biol.* *17*,  
681 e3000107.
- 682 Olczak, E., Kuryłowicz, A., Wicik, Z., Kołodziej, P., Cąkała-Jakimowicz, M.,  
683 Buyanovskaya, O., Ślusarczyk, P., Mossakowska, M., and Puzianowska-Kuźnicka, M.  
684 (2019). Glucocorticoid receptor (NR3C1) gene polymorphisms are associated with age and  
685 blood parameters in Polish Caucasian nonagenarians and centenarians. *Exp. Gerontol.* *116*,  
686 20–24.
- 687 Petkovich, D.A., Podolskiy, D.I., Lobanov, A. V, Lee, S.-G., Miller, R.A., and Gladyshev,  
688 V.N. (2017). Using DNA methylation profiling to evaluate biological age and longevity  
689 interventions. *Cell Metab.* *25*, 954-960. e6.
- 690 Pinnapureddy, A.R., Stayner, C., McEwan, J., Baddeley, O., Forman, J., and Eccles, M.R.  
691 (2015). Large animal models of rare genetic disorders: sheep as phenotypically relevant  
692 models of human genetic disease. *Orphanet J. Rare Dis.* *10*, 107.
- 693 Ponnusamy, S., Asemota, S., Schwartzberg, L.S., Guestini, F., McNamara, K.M., Pierobon,  
694 M., Font-Tello, A., Qiu, X., Xie, Y., and Rao, P.K. (2019). Androgen Receptor Is a Non-  
695 canonical Inhibitor of Wild-Type and Mutant Estrogen Receptors in Hormone Receptor-  
696 Positive Breast Cancers. *Iscience* *21*, 341–358.
- 697 Quinlan, A.R., and Hall, I.M. (2010). BEDTools: a flexible suite of utilities for comparing  
698 genomic features. *Bioinformatics* *26*, 841–842.
- 699 Rakyán, V.K., Down, T.A., Maslau, S., Andrew, T., Yang, T.-P., Beyan, H., Whittaker, P.,  
700 McCann, O.T., Finer, S., and Valdes, A.M. (2010). Human aging-associated DNA  
701 hypermethylation occurs preferentially at bivalent chromatin domains. *Genome Res.* *20*, 434–  
702 439.
- 703 Russell, W.M.S., and Burch, R.L. (1959). *The principles of humane experimental technique*  
704 (Methuen).
- 705 Sahu, B., Laakso, M., Pihlajamaa, P., Ovaska, K., Sinielnikov, I., Hautaniemi, S., and Jänne,  
706 O.A. (2013). FoxA1 specifies unique androgen and glucocorticoid receptor binding events in  
707 prostate cancer cells. *Cancer Res.* *73*, 1570–1580.
- 708 Sehl, M.E., Henry, J.E., Storniolo, A.M., Ganz, P.A., and Horvath, S. (2017). DNA  
709 methylation age is elevated in breast tissue of healthy women. *Breast Cancer Res. Treat.* *164*,  
710 209–219.
- 711 Seideman, S.C., Cross, H.R., Oltjen, R.R., and Schanbacher, B.D. (1982). Utilization of the



712 intact male for red meat production: a review. *J. Anim. Sci.* *55*, 826–840.

713 Stubbs, T.M., Bonder, M.J., Stark, A.-K., Krueger, F., von Meyenn, F., Stegle, O., and Reik,  
714 W. (2017). Multi-tissue DNA methylation age predictor in mouse. *Genome Biol.* *18*, 68.

715 Talbert, G.B., and Hamilton, J.B. (1965). Duration of life in Lewis strain of rats after  
716 gonadectomy at birth and at older ages. *J. Gerontol.* *20*, 489–491.

717 Teschendorff, A.E., Menon, U., Gentry-Maharaj, A., Ramus, S.J., Weisenberger, D.J., Shen,  
718 H., Campan, M., Noushmehr, H., Bell, C.G., and Maxwell, A.P. (2010). Age-dependent  
719 DNA methylation of genes that are suppressed in stem cells is a hallmark of cancer. *Genome*  
720 *Res.* *20*, 440–446.

721 Thompson, M.J., Chwiałkowska, K., Rubbi, L., Lusic, A.J., Davis, R.C., Srivastava, A.,  
722 Korstanje, R., Churchill, G.A., Horvath, S., and Pellegrini, M. (2018). A multi-tissue full  
723 lifespan epigenetic clock for mice. *Aging (Albany NY)* *10*, 2832.

724 Tidiere, M., Gaillard, J., Müller, D.W.H., Lackey, L.B., Gimenez, O., Clauss, M., and  
725 Lemaître, J. (2015). Does sexual selection shape sex differences in longevity and senescence  
726 patterns across vertebrates? A review and new insights from captive ruminants. *Evolution (N.*  
727 *Y.)*. *69*, 3123–3140.

728 Triche Jr, T.J., Weisenberger, D.J., Van Den Berg, D., Laird, P.W., and Siegmund, K.D.  
729 (2013). Low-level processing of Illumina Infinium DNA methylation beadarrays. *Nucleic*  
730 *Acids Res.* *41*, e90–e90.

731 Wang, T., Tsui, B., Kreisberg, J.F., Robertson, N.A., Gross, A.M., Yu, M.K., Carter, H.,  
732 Brown-Borg, H.M., Adams, P.D., and Ideker, T. (2017). Epigenetic aging signatures in mice  
733 livers are slowed by dwarfism, calorie restriction and rapamycin treatment. *Genome Biol.* *18*,  
734 57.

735 Wang, Z., Zang, C., Rosenfeld, J.A., Schones, D.E., Barski, A., Cuddapah, S., Cui, K., Roh,  
736 T.-Y., Peng, W., and Zhang, M.Q. (2008). Combinatorial patterns of histone acetylations and  
737 methylations in the human genome. *Nat. Genet.* *40*, 897.

738 Zheng, R., Wan, C., Mei, S., Qin, Q., Wu, Q., Sun, H., Chen, C.-H., Brown, M., Zhang, X.,  
739 and Meyer, C.A. (2019). Cistrome Data Browser: expanded datasets and new tools for gene  
740 regulatory analysis. *Nucleic Acids Res.* *47*, D729–D735.

741



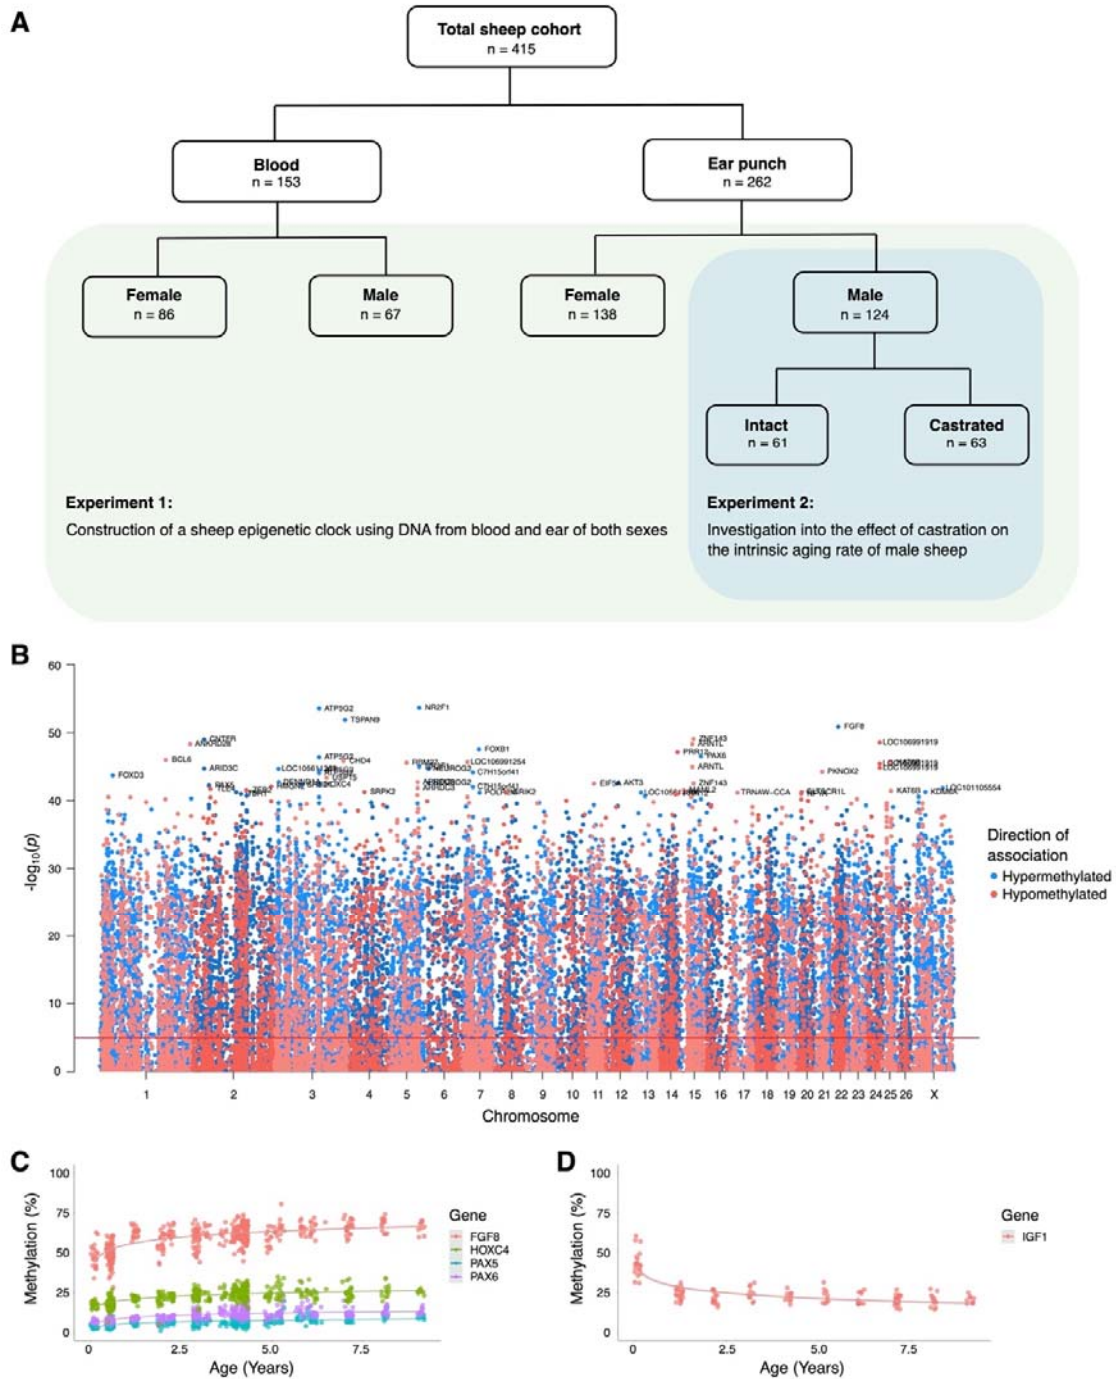

742

743

744 **Figure 1. Creation of the epigenetic clock in sheep. A)** Description of sheep cohort for this

745 study. **B)** Manhattan plot of all CpGs and their correlation with chronological age. **C)**

746 Methylation levels of highly age correlated probes within biologically relevant genes: *FGF8*

747 *cg10708287* ( $r=0.64$ ,  $p=1.38E^{-51}$ ), *PAX6* *cg00953859* ( $r=0.62$ ,  $p=2.71E^{-47}$ ), *PAX5*

748 *cg16071226* ( $r=0.59$ ,  $p=5.75E^{-43}$ ), *HOXC4* *cg12097121* ( $r=0.59$ ,  $p=4.47E^{-43}$ ). **D)** Methylation

749 levels of *IGF1* cg18266944 in ear of females only ( $r=0.60$ ,  $p=7.43^{-15}$ ). The  $p$  values of the  
750 correlation were calculated using the *standardScreeningNumericTrait* function in WGNCA  
751 (Student t-test).  
752

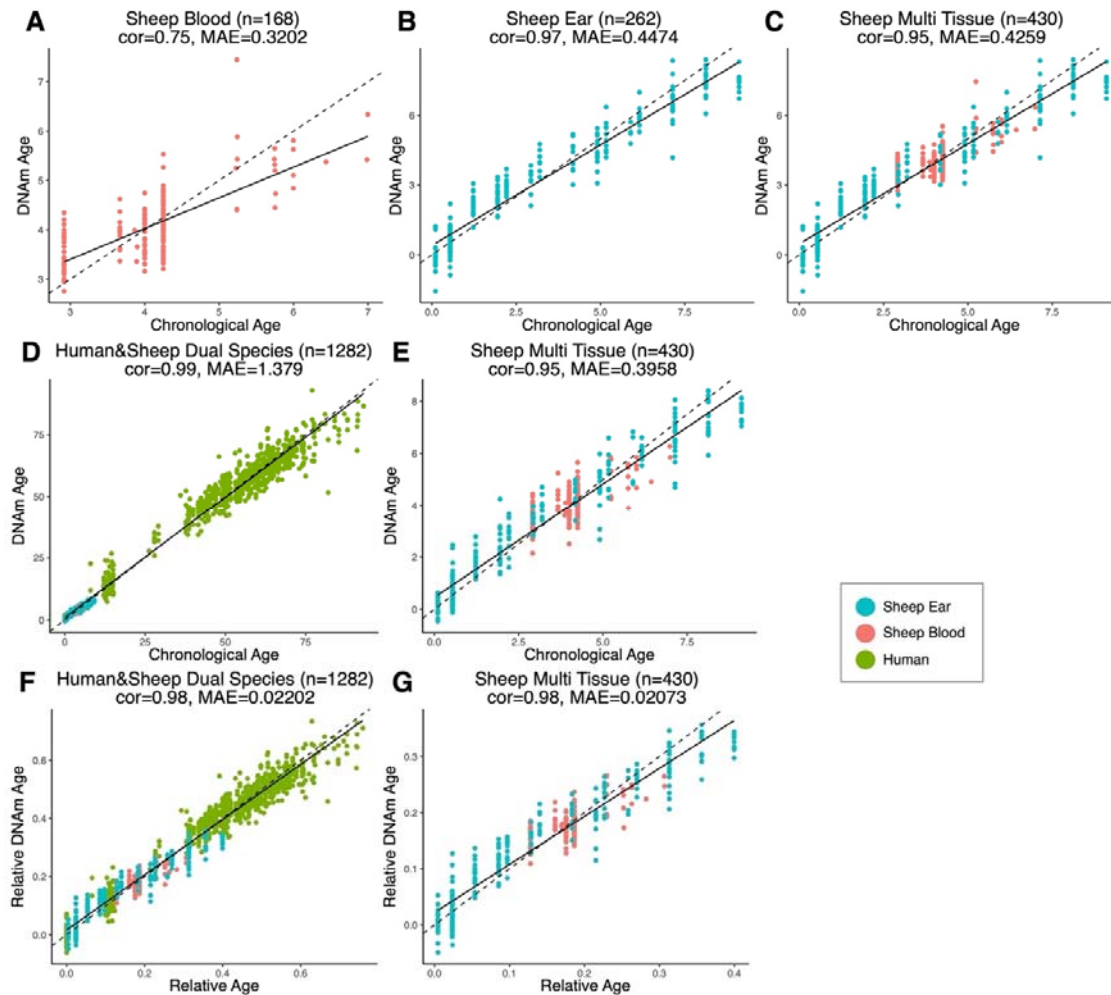

753

754 **Figure 2. Comparison of chronological age (x-axis) and epigenetic age (y-axis) for a**  
755 **variety of clock models.** Correlation (cor) and median absolute error (error) is indicated for  
756 **A)** sheep blood (cor=0.75, error=0.3202), **B)** sheep ear (cor=0.97, error=0.4474), **C)** sheep  
757 multi-tissue (ear and blood) (cor=0.95, error=0.4259), **D)** human & sheep dual-species  
758 (cor=0.99, error=1.379), and **E)** sheep multi-tissue (cor=0.95, error=0.3958). **F)**  
759 chronological age (x-axis) plotted against epigenetic age (y-axis) relative to maximum  
760 lifespan for human & sheep dual-species clock (cor=0.98, error=0.02202), and **G)**  
761 chronological age (x-axis) plotted against epigenetic age (y-axis) relative to maximum  
762 lifespan for the sheep multi-tissue clock (cor=0.98, error=0.02073). Maximum lifespan  
763 values used were for human and sheep respectively were 122.5 years and 22.8 years. Each  
764 data point represents one sample, coloured based on origin.

765

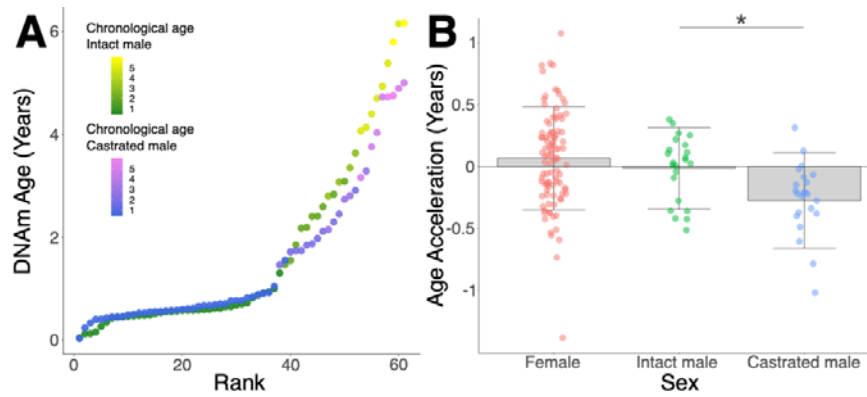

766

767 **Figure 3. Epigenetic age deceleration in castrated sheep.** A) Epigenetic age in age-  
768 matched castrated and intact males. To equate the cohort sizes for intact and castrated males,  
769 two age-matched castrates with DNAm age estimates closest to the group mean were  
770 excluded. B) Age acceleration based on sex and castration status in sexually mature sheep  
771 only (ages 18 months+ only). Castrated males have decelerated DNAm age compared to  
772 intact males (\*:  $p=0.01$ , Mann-Whitney U test).

773

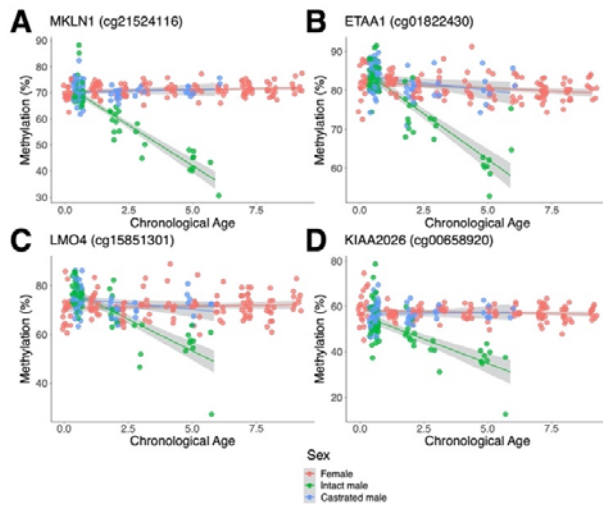

774

775 **Figure 4. Top androgen-sensitive differentially methylated probes (asDMPs) in sheep**

776 **ear. A) *MKLN1* (cg21524116,  $p=1.05E^{-27}$ ), B) *ETAA1* (cg01822430,  $p=1.31E^{-13}$ ), C) *LMO4***

777 **(cg15851301,  $p=1.62E^{-09}$ ), D) *KIAA2026* (cg00658920,  $p=2.46E^{-09}$ ).** The  $p$  values were

778 calculated using a t-test of the difference in linear regression slopes.

779

780

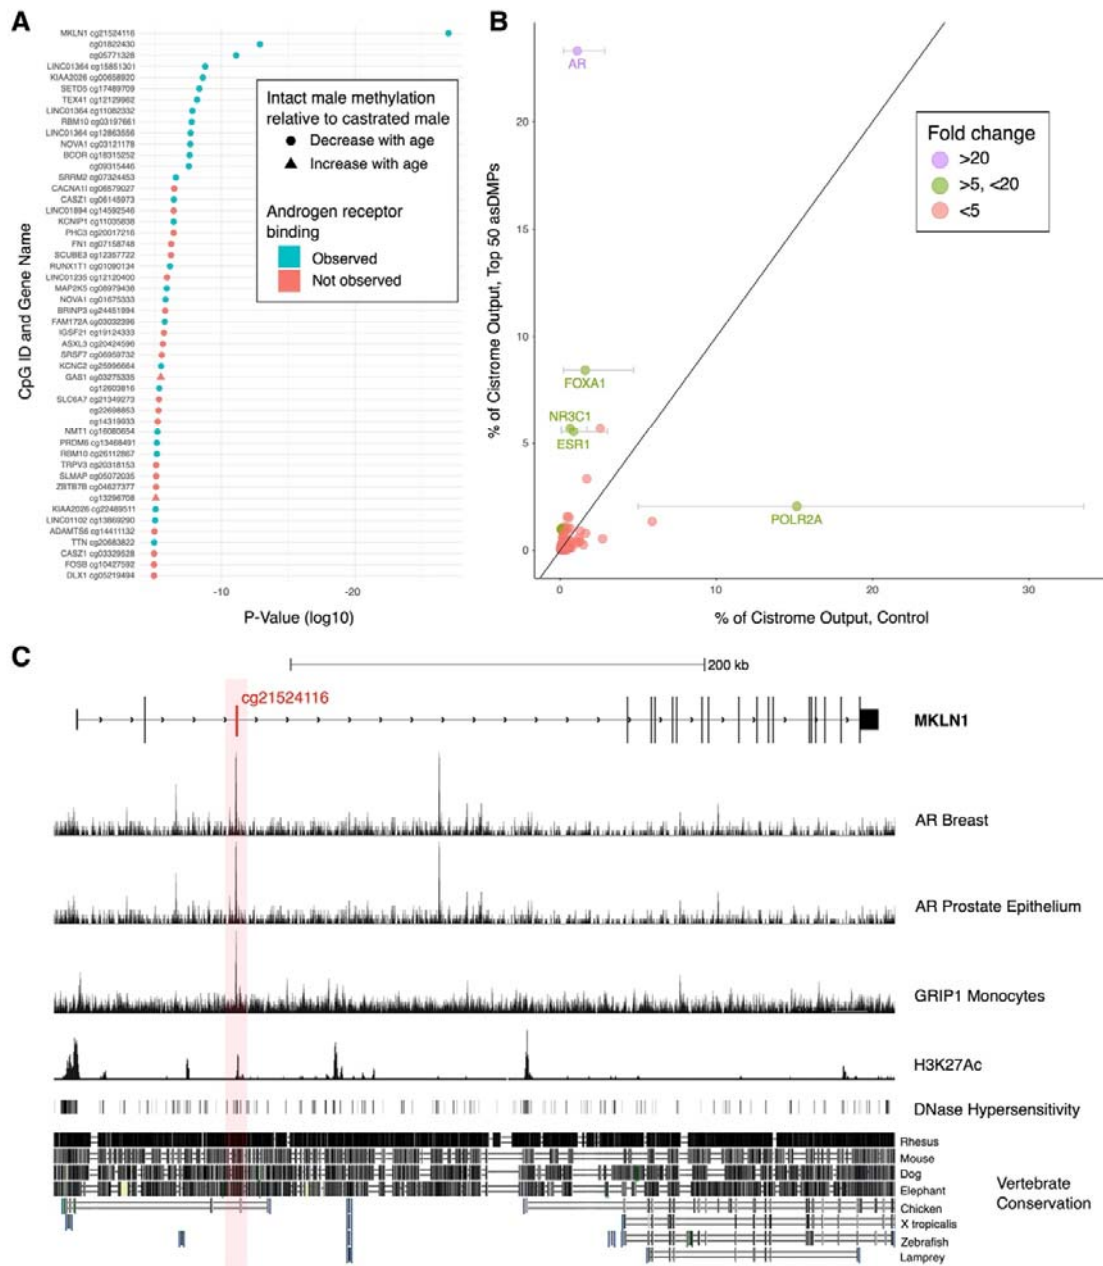

781

782 **Figure 5. Analysis of chromatin immunoprecipitation and sequencing (ChIP-seq) data**  
 783 **indicates functional links to sex-dependent epigenetic aging. A)** Top 50 asDMPs between  
 784 intact and castrated male sheep, and the human genes they map to (where applicable). The  
 785 top 14 most significant asDMPs are all bound by AR; and 48/50 of these sites exhibit  
 786 hypomethylation with age in intact males relative to castrated males. **B)** Observed  
 787 transcription factor binding at the top 50 asDMPs compared to expected binding based upon  
 788 empirical sampling at random CpGs (average of 1000 bootstrap replicates). Transcription  
 789 factors with >5-fold variation and an absolute value of >2% are labelled with error bars

790 showing the range of TF binding in bootstrap sampling. Colours indicate fold-change  
791 between observed and expected TF binding; 1-5 (red), 5-20 (green) and >20 (purple) C)  
792 Genomic view of *MKLNI* containing the most significant asDMP cg21524116 illustrating  
793 AR binding and indicators of active chromatin.  
794

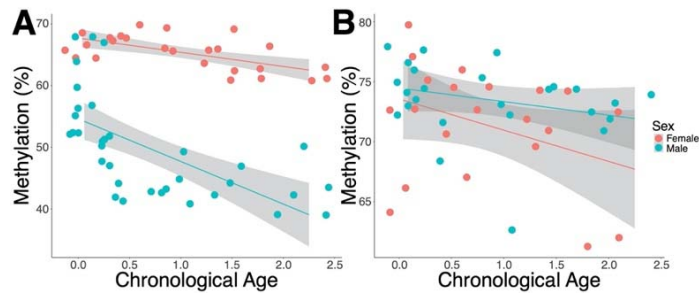

795

796 **Figure 6. Androgen-sensitive methylation patterns in cg21524116 (*MKLN1*) in mouse**

797 **muscle and blood. A) *MKLN1* in muscle of male mice exhibits a similar androgen-**

798 **dependent methylation loss as seen in intact sheep, suggesting the existence of a wider**

799 **mammalian effect ( $p=0.0035$ , t-test). B) In contrast to muscle, *MKLN1* in mouse blood does**

800 **not demonstrate androgen-sensitivity ( $p=0.362$ , t-test), indicating that this effect is tissue-**

801 **specific. The other tissues examined (cerebellum, cortex, liver and striatum) also showed no**

802 **androgen-sensitive methylation patterns.**

803



804 **SUPPLEMENTARY FIGURES**

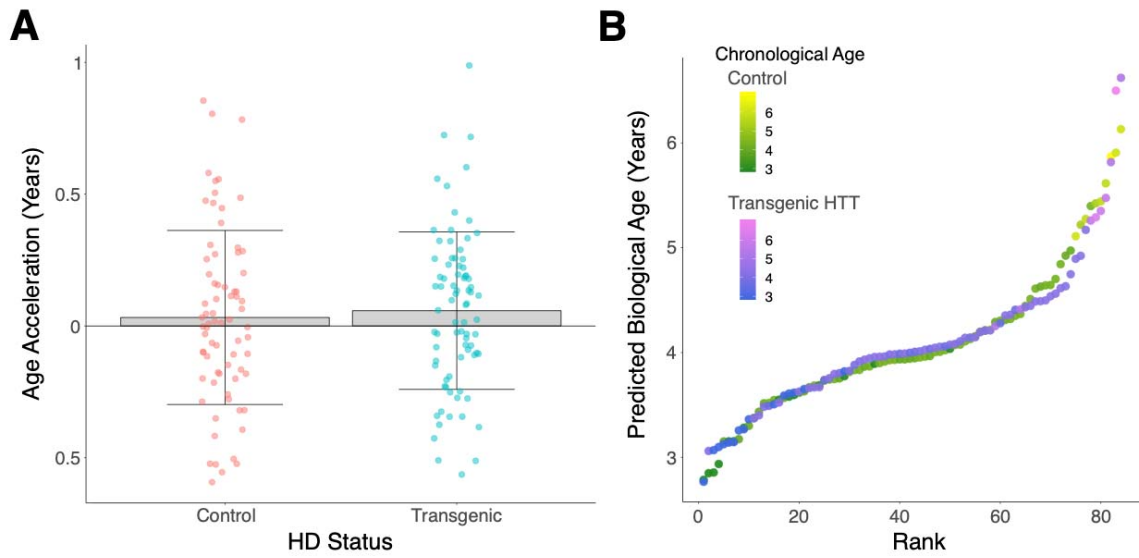

805

806

807 **Supplementary Figure 1.** The epigenetic ages of control and transgenic HTT sheep are not

808 significantly different ( $p=0.30$ , Mann-Whitney U test).

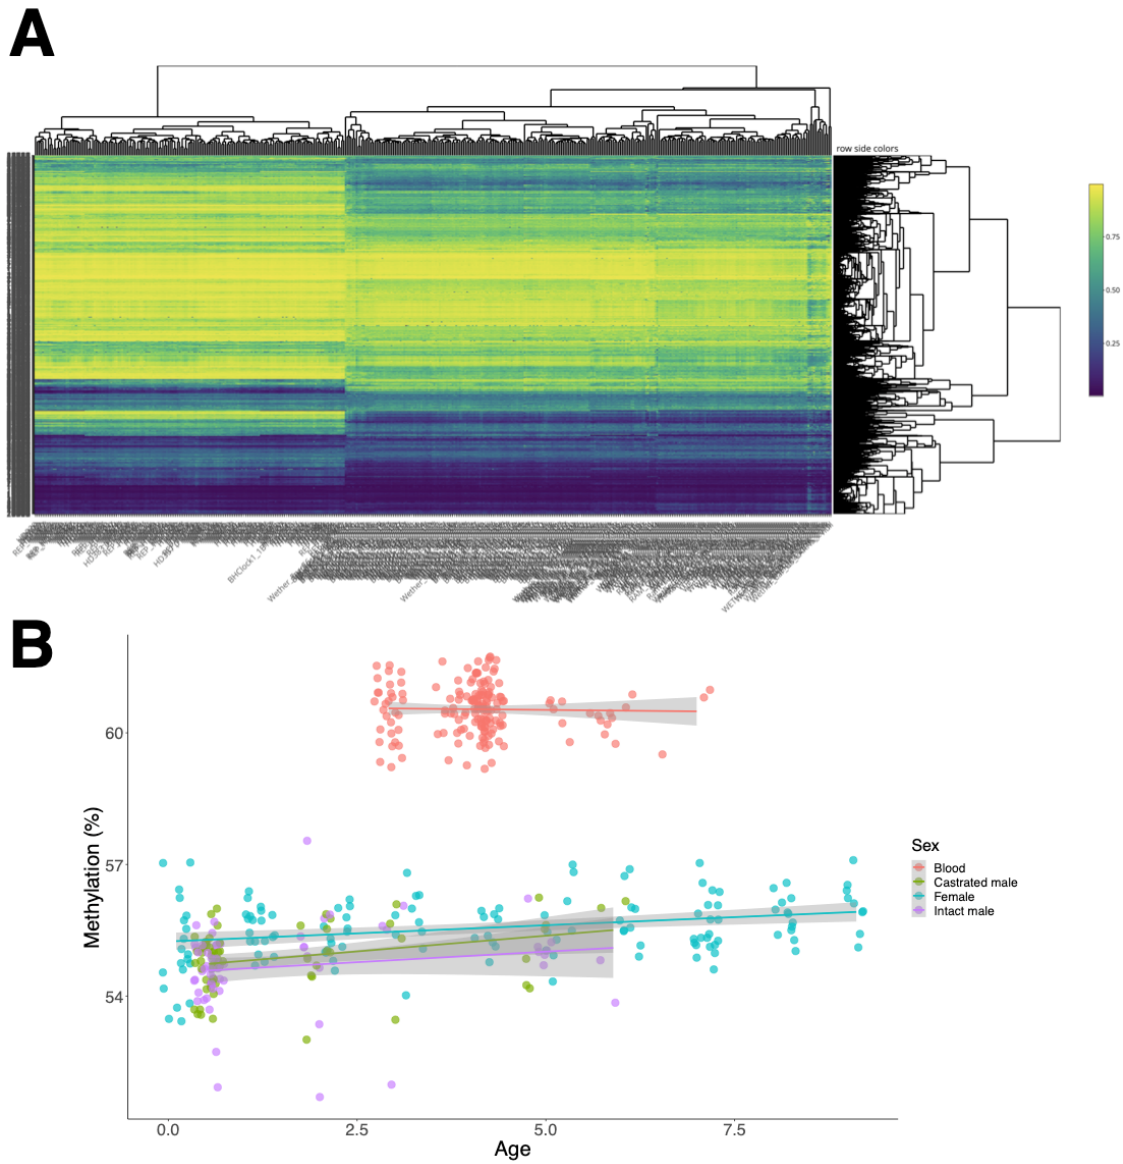

809

810

811 **Supplementary Figure 2.** A) Hierarchical clustering heat map shows methylation profiles  
812 grouped by sheep tissue type; blood (left side) vs. ear (right side). B) Average methylation in  
813 sheep ear and blood as age progresses.

814

815

816

817

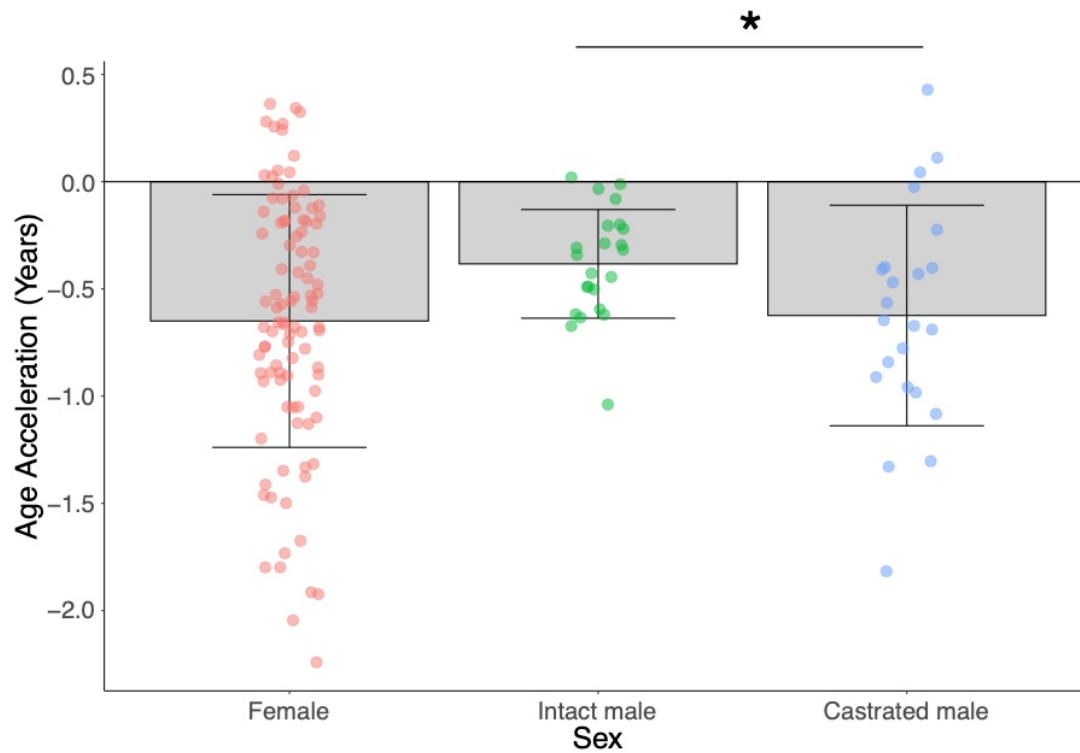

818

819 **Supplementary Figure 3.** Age acceleration based on sex and castration status in sexually  
820 mature sheep only (age 18 months+ only), using the human & sheep dual-species clock.  
821 Asterisk indicates the significant difference between age acceleration in castrated and intact  
822 males ( $p=0.04$ , Mann-Whitney U test).

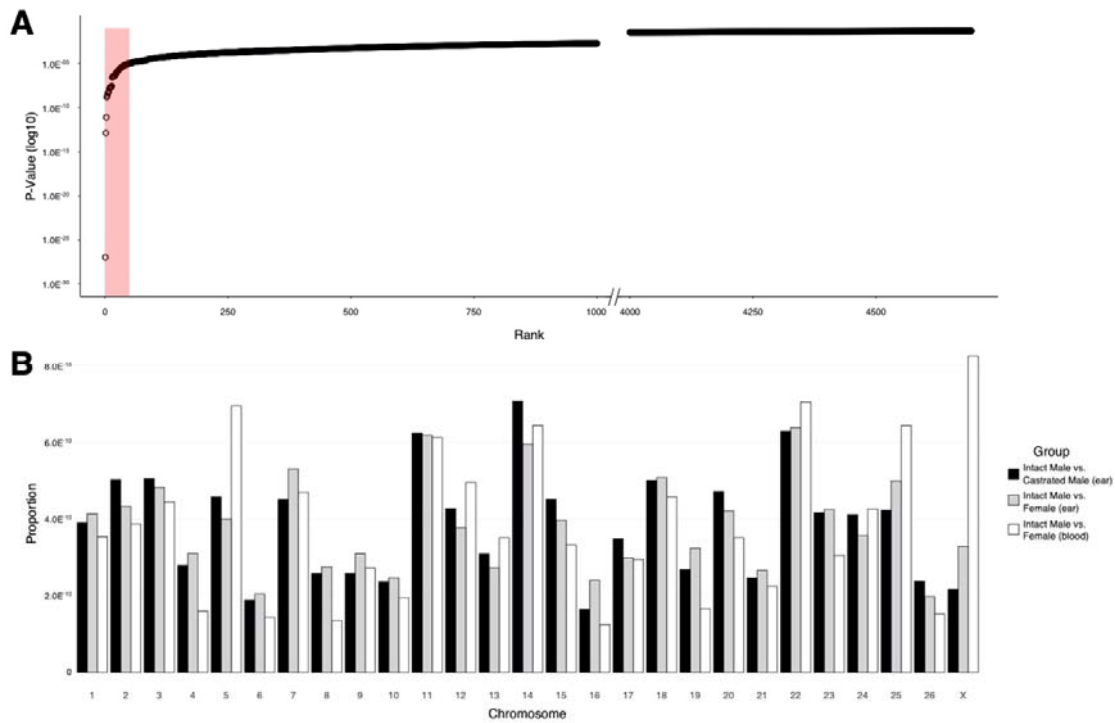

823

824 **Supplementary Figure 4. Chromosome location of androgen-sensitive DMPs.** A) All  
825 4,694 statistically significant ( $p < 0.05$ ) asDMPs ordered by  $p$  value. The top 50 asDMPs are  
826 highlighted in red (and are examined more closely in Figure 5A), after which there is a clear  
827 inflection point of  $p$  value. B) Chromosome location of all statistically significant asDMPs in  
828 all sheep groups. Y-axis shows the proportion of probes that map to each chromosome,  
829 normalised for chromosome size and percentage of significant probes within each  
830 comparison group.

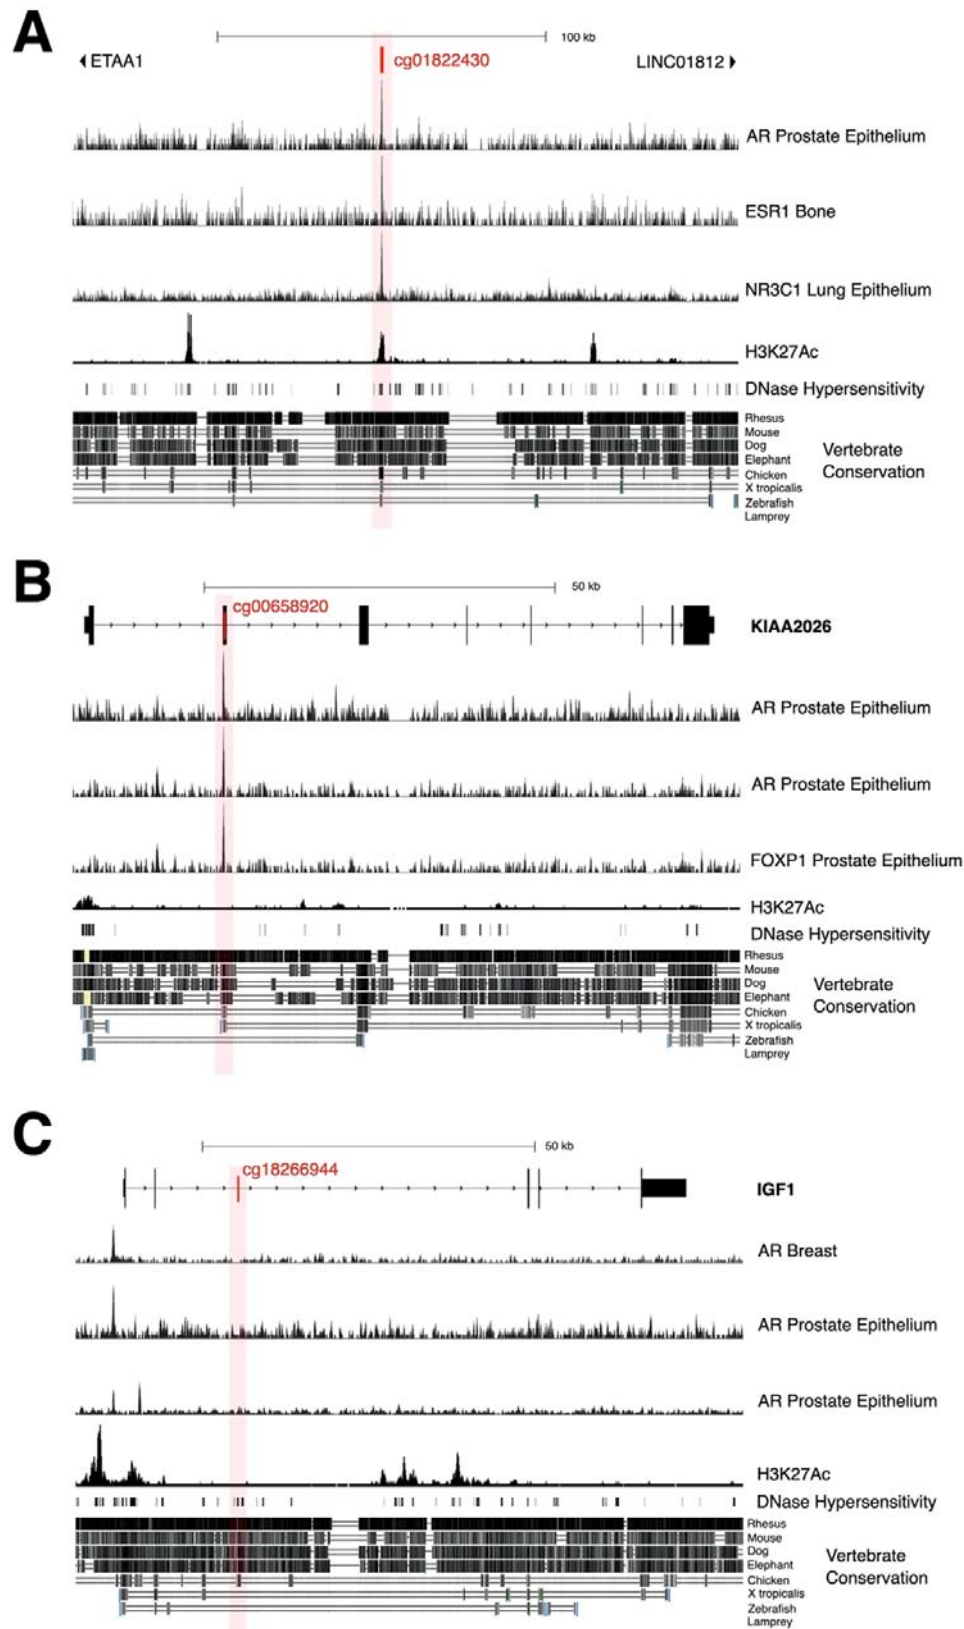

832

833 **Supplementary Figure 5. Gene views of key androgen-sensitive sites showing evidence**

834 **for possible regulatory functions. A) *ETAA1*; cg01822430 (second most significant sheep**

835 **asDMP). B) *KIAA2026* cg00658920. C) *IGF1* cg18266944.**

836

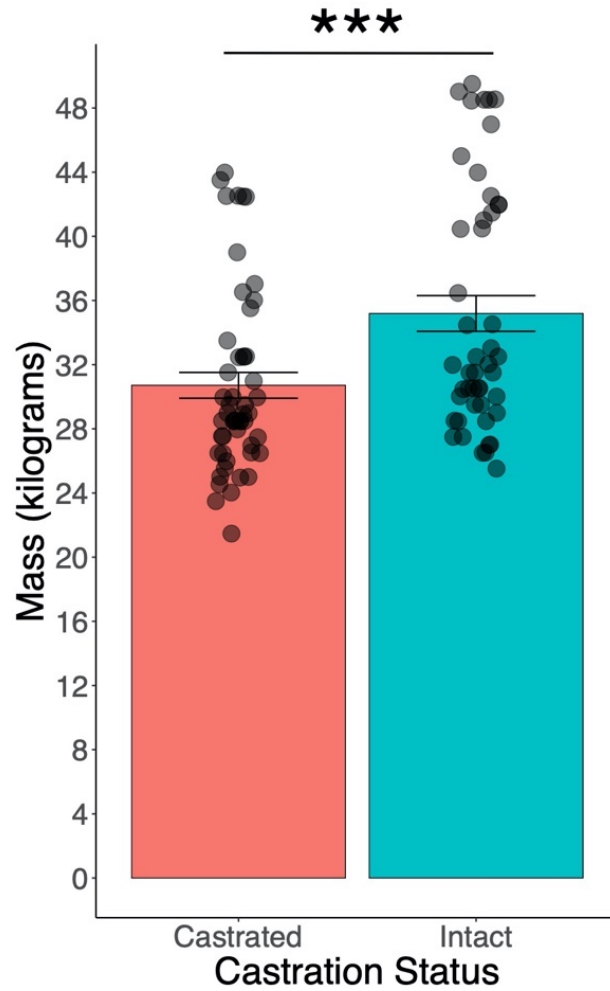

837

838

839 **Supplementary Figure 6.** Mass (kg) of male lambs (<1 year) dependent on castration status.

840  $p < 0.001$  (T-test). Error bars = SEM.
