# Supplementary material for: Castration delays epigenetic aging and feminises DNA methylation at androgen-regulated loci
Source: bioRxiv preprint, doi:10.1101/2020.11.16.385369, version 1 (2020-11-17)
Supplement: Supplemental Table 1 [file 385369_file02.csv]

	ID	cor	Z	pvalueStudent	qvalueStudent	AreaUnderROC	nPresentSamples	CpG ID	Chromosome	Start	End	Gene Symbol	Annotation
14485	V14485	0.681541216	17.25243907	2.72E-60	7.40E-57	0.769659652	432	cg09317554
20062	V20062	0.655439068	16.27344704	2.22E-54	2.65E-51	0.761791135	432	cg13776863	chr5	90340086	90340136	NR2F1	Distal Intergenic
16272	V16272	0.654886201	16.25336075	2.91E-54	2.65E-51	0.756006146	432	cg10749945	chr3	132549302	132549352	ATP5G2	Promoter (1-2kb)
24242	V24242	0.647053063	15.97146865	1.33E-52	9.03E-50	0.767029053	432	cg17037818	chr3	210387955	210388005	TSPAN9	Promoter (<=1kb)
1071	V1071	0.642130548	15.79682953	1.38E-51	7.52E-49	0.74003329	432	cg10708287	chr22	21657474	21657524	FGF8	Promoter (<=1kb)
2162	V2162	0.63293971	15.47572084	9.75E-50	3.80E-47	0.755703511	432	cg22062581	chr2	36802537	36802587	CNTFR	Intron (XM_015093062.1/CNTFR, intron 2 of 9)
7920	V7920	0.62568886	15.22676414	2.54E-48	5.76E-46	0.7155927	432	cg04105754
28943	V28943	0.625513278	15.22078186	2.75E-48	5.76E-46	0.716267809	432	cg20748408
25437	V25437	0.625335127	15.2147143	2.97E-48	5.79E-46	0.754143775	432	cg17997082	chr7	47233709	47233759	FOXB1	Promoter (8-9kb)
3922	V3922	0.620303673	15.04425782	2.71E-47	4.62E-45	0.764363535	432	cg00953859	chr15	60667368	60667418	PAX6	Intron (XM_012096162.1/PAX6, intron 2 of 11)
11263	V11263	0.619395023	15.01365929	4.02E-47	6.45E-45	0.74614722	432	cg06748976	chr3	132549307	132549357	ATP5G2	Promoter (1-2kb)
35684	V35684	0.611927757	14.76429016	9.82E-46	1.12E-43	0.750977745	432	cg26219540	chr5	90340095	90340145	NR2F1	Distal Intergenic
7439	V7439	0.610392258	14.71346549	1.87E-45	1.89E-43	0.739489245	432	cg03719598	chr2	36757719	36757769	ARID3C	Intron (XM_015092771.1/ARID3C, intron 3 of 7)
6290	V6290	0.610183774	14.70657644	2.05E-45	1.99E-43	0.733017506	432	cg02783173	chr6	13158281	13158331	NEUROG2	Promoter (5-6kb)
4349	V4349	0.61009966	14.70379779	2.12E-45	1.99E-43	0.752130087	432	cg01307653	chr3	11090861	11090911	LOC105611269	Intron (XR_001434256.1/LOC105611269, intron 1 of 3)
15014	V15014	0.609018939	14.6681374	3.33E-45	2.95E-43	0.735392029	432	cg09706122	chr3	132549185	132549235	ATP5G2	Promoter (1-2kb)
33840	V33840	0.60717432	14.60744275	7.19E-45	5.94E-43	0.738965453	432	cg24750270	chr7	29322924	29322974	C7H15orf41	Intron (XM_012181163.2/C7H15orf41, intron 3 of 8)
15082	V15082	0.60678819	14.59476497	8.43E-45	6.57E-43	0.739722041	432	cg09755893	chr3	132549296	132549346	ATP5G2	Promoter (1-2kb)
9731	V9731	0.604731787	14.527405	1.97E-44	1.49E-42	0.780182047	432	cg05551621	chr1	38282838	38282888	FOXD3	Promoter (<=1kb)
17466	V17466	0.60126108	14.41431415	8.16E-44	5.85E-42	0.741968526	432	cg11728741
24595	V24595	0.599215737	14.34801384	1.87E-43	1.28E-41	0.719922712	432	cg17316594	chr3	11866223	11866273	DENND1A	Intron (XM_012163262.2/DENND1A, intron 1 of 20)
8286	V8286	0.598667251	14.3302777	2.33E-43	1.55E-41	0.749394729	432	cg04407762	chr6	13158310	13158360	NEUROG2	Promoter (5-6kb)
10823	V10823	0.598366199	14.32055041	2.63E-43	1.71E-41	0.741793929	432	cg06436715	chr12	31530798	31530848	AKT3	Intron (XM_012187197.2/AKT3, intron 1 of 11)
17905	V17905	0.5970475	14.27800623	4.47E-43	2.65E-41	0.742224602	432	cg12097121	chr3	132155244	132155294	HOXC4	Promoter (<=1kb)
27205	V27205	0.596896861	14.2731529	4.75E-43	2.75E-41	0.691637955	432	cg19434731	chr3	78664959	78665009	SRBD1	Intron (XM_004005979.2/SRBD1, intron 16 of 20)
23022	V23022	0.596418009	14.25773412	5.75E-43	3.26E-41	0.735554986	432	cg16071226	chr2	51407386	51407436	PAX5	5' UTR
20700	V20700	0.595123581	14.21612253	9.63E-43	5.17E-41	0.704302077	432	cg14284338	chr7	29303567	29303617	C7H15orf41	Intron (XM_012181163.2/C7H15orf41, intron 2 of 8)
18720	V18720	0.595115097	14.21585013	9.66E-43	5.17E-41	0.702253469	432	cg12757011
4150	V4150	0.594167554	14.18545313	1.41E-42	7.24E-41	0.691102524	432	cg01130719	chrX	94103430	94103480	LOC101105554	Exon (XM_015105014.1/LOC101105554, exon 9 of 17)
1457	V1457	0.592259248	14.12439516	2.99E-42	1.43E-40	0.683362045	432	cg14556683
5274	V5274	0.590826035	14.07867788	5.26E-42	2.39E-40	0.689286712	432	cg02021058	chrX	42056761	42056811	KDM6A	3' UTR
14377	V14377	0.590655717	14.07325293	5.62E-42	2.47E-40	0.753387187	432	cg09227056	chr2	132942974	132943024	EVX2	Distal Intergenic
31143	V31143	0.590276432	14.06117798	6.52E-42	2.78E-40	0.704511593	432	cg22528869	chr13	23236941	23236991	LOC105612306	Promoter (5-6kb)
30578	V30578	0.590171683	14.05784461	6.79E-42	2.81E-40	0.699832387	432	cg22050425	chr7	49435995	49436045	POLR2M	Distal Intergenic
16517	V16517	0.589253593	14.02865604	9.72E-42	3.84E-40	0.75193221	432	cg10954251	chr2	147255887	147255937	TBR1	Promoter (<=1kb)
1115	V1115	0.587583662	13.97568819	1.86E-41	7.05E-40	0.684514387	432	cg11149600	chr2	164468742	164468792	ZEB2	Intron (XM_012138277.2/ZEB2, intron 7 of 14)
3683	V3683	0.587205069	13.96370184	2.15E-41	8.05E-40	0.69320933	432	cg00772515	chr13	35193697	35193747	WAC	Exon (XM_012188476.2/WAC, exon 1 of 11)
20803	V20803	0.586713889	13.94816306	2.60E-41	9.60E-40	0.69070677	432	cg14372254	chrX	22117462	22117512	POLA1	Intron (XM_012106423.2/POLA1, intron 34 of 36)
1179	V1179	0.586514844	13.94187004	2.81E-41	1.01E-39	0.67793789	432	cg11671363
8334	V8334	0.586434644	13.93933508	2.90E-41	1.01E-39	0.725847379	432	cg04447017	chr3	132549061	132549111	ATP5G2	Promoter (1-2kb)
8443	V8443	0.58499496	13.893891	5.05E-41	1.66E-39	0.707619425	432	cg04531442	chr1	273383096	273383146	SATB1	Intron (XM_015092727.1/SATB1, intron 1 of 9)
8499	V8499	0.584481498	13.87771158	6.15E-41	1.97E-39	0.731411211	432	cg04567783	chr15	60659916	60659966	PAX6	Intron (XM_012096162.1/PAX6, intron 6 of 11)
32300	V32300	0.582917957	13.82853433	1.12E-40	3.39E-39	0.686178881	432	cg23472306	chr15	42559320	42559370	WEE1	Exon (XM_015101039.1/WEE1, exon 14 of 21)
34129	V34129	0.581701281	13.79036068	1.78E-40	5.00E-39	0.694082317	432	cg24987599	chrX	22136813	22136863	POLA1	Intron (XM_012106423.2/POLA1, intron 35 of 36)
36002	V36002	0.581529	13.7849619	1.90E-40	5.28E-39	0.698528727	432	cg26457747	chr4	65003431	65003481	NEUROD6	Distal Intergenic
8019	V8019	0.581356927	13.77957129	2.03E-40	5.58E-39	0.700484216	432	cg04191285	chr9	37780525	37780575	TOX	Intron (XM_015097774.1/TOX, intron 2 of 7)
37426	V37426	0.581255891	13.77640685	2.10E-40	5.68E-39	0.744482727	432	cg27639460	chr3	11090843	11090893	LOC105611269	Intron (XR_001434256.1/LOC105611269, intron 1 of 3)
8298	V8298	0.581132457	13.77254164	2.20E-40	5.89E-39	0.725509824	432	cg04418091	chr3	132549182	132549232	ATP5G2	Promoter (1-2kb)
29873	V29873	0.580804983	13.76229123	2.50E-40	6.36E-39	0.730712822	432	cg21508838	chr5	85471846	85471896	LOC101105819	Intron (XR_001040782.2/LOC101105819, intron 3 of 3)
30090	V30090	0.580674553	13.75821024	2.62E-40	6.62E-39	0.684584226	432	cg21669438	chr8	61234913	61234963	BCLAF1	Exon (XR_001042268.2/BCLAF1, exon 10 of 14)
3557	V3557	0.580519026	13.75334519	2.78E-40	6.89E-39	0.712228792	432	cg00673150	chr2	152180720	152180770	NR4A2	Exon (XM_004004686.2/NR4A2, exon 3 of 8)
5139	V5139	0.579917877	13.73455304	3.49E-40	8.42E-39	0.684397989	432	cg01927175	chr16	3065870	3065920	RANBP17	Intron (XM_012096710.1/RANBP17, intron 14 of 27)
32107	V32107	0.579559365	13.72335525	4.00E-40	9.56E-39	0.702346587	432	cg23311420	chr3	76419852	76419902	FBXO11	3' UTR
8264	V8264	0.579479123	13.72084991	4.12E-40	9.77E-39	0.712810783	432	cg04394058	chr2	51162979	51163029	ZCCHC7	Intron (XM_015093142.1/ZCCHC7, intron 5 of 8)
19023	V19023	0.57939362	13.7181807	4.25E-40	1.00E-38	0.697027191	432	cg12977525	chr15	24873599	24873649	LOC106990350	Distal Intergenic
5969	V5969	0.579324575	13.71602557	4.37E-40	1.02E-38	0.738604619	432	cg02532525	chr11	22652142	22652192	HIC1	Promoter (3-4kb)
28292	V28292	0.579014734	13.70635756	4.91E-40	1.12E-38	0.69961123	432	cg20251350	chr3	45056922	45056972	EHBP1	Exon (XM_004005849.3/EHBP1, exon 16 of 26)
12988	V12988	0.578986602	13.70548002	4.96E-40	1.13E-38	0.692476022	432	cg08153570	chr23	54884458	54884508	TCF4	Intron (XM_015103776.1/TCF4, intron 3 of 14)
37256	V37256	0.578459516	13.68904607	6.04E-40	1.33E-38	0.729758357	432	cg27496468	chr8	29024017	29024067	NR2E1	Promoter (1-2kb)
34658	V34658	0.578304382	13.68421202	6.41E-40	1.40E-38	0.692813577	432	cg25424394	chr12	32049740	32049790	CEP170	Exon (XM_012187208.2/CEP170, exon 13 of 19)
622	V622	0.578028943	13.67563244	7.10E-40	1.53E-38	0.733599497	432	cg05977669	chr4	68820587	68820637	HOXA11	5' UTR
7807	V7807	0.578022393	13.67542847	7.12E-40	1.53E-38	0.707002514	432	cg04016956	chr7	8758616	8758666	TBCA	Distal Intergenic
35465	V35465	0.577570916	13.66137455	8.43E-40	1.78E-38	0.701415402	432	cg26050590	chr4	111775883	111775933	ZNF777	Exon (XM_015095427.1/ZNF777, exon 7 of 8)
2005	V2005	0.577442922	13.65739226	8.85E-40	1.83E-38	0.684595866	432	cg20426749	chr25	32535224	32535274	KCNMA1	Intron (NM_001303455.1/KCNMA1, intron 15 of 25)
676	V676	0.576578318	13.63051485	1.22E-39	2.43E-38	0.7257659	432	cg06561106	chr2	51407457	51407507	PAX5	5' UTR
29201	V29201	0.575405245	13.59411235	1.89E-39	3.63E-38	0.702532824	432	cg20980578	chr1	154536131	154536181	ZNF654	5' UTR
3741	V3741	0.575250732	13.58932301	2.00E-39	3.79E-38	0.699366794	432	cg00809089	chrX	22117328	22117378	POLA1	Intron (XM_012106423.2/POLA1, intron 34 of 36)
29289	V29289	0.575218711	13.58833063	2.03E-39	3.81E-38	0.690334296	432	cg21056360	chr18	61699060	61699110	TRNAS-GGA	Distal Intergenic
28264	V28264	0.574799382	13.57534014	2.37E-39	4.36E-38	0.690485613	432	cg20224547	chr3	11338798	11338848	PSMB7	Intron (XM_004005645.2/PSMB7, intron 6 of 7)
8104	V8104	0.574587433	13.56877764	2.56E-39	4.69E-38	0.6875291	432	cg04262128	chr22	47470018	47470068	MGMT	Distal Intergenic
31614	V31614	0.574495153	13.56592116	2.65E-39	4.82E-38	0.698796443	432	cg22930218	chr2	164468347	164468397	ZEB2	Intron (XM_012138277.2/ZEB2, intron 7 of 14)
21015	V21015	0.574455177	13.56468388	2.69E-39	4.86E-38	0.697516063	432	cg14515103	chr1	24932417	24932467	FAF1	Intron (XM_004001957.3/FAF1, intron 7 of 18)
35957	V35957	0.574313811	13.56030915	2.84E-39	5.09E-38	0.690625291	432	cg26422625	chrX	22239048	22239098	ARX	Downstream (2-3kb)
1975	V1975	0.573708537	13.54159026	3.55E-39	6.24E-38	0.723531055	432	cg20162381	chr3	210387973	210388023	TSPAN9	Promoter (<=1kb)
21190	V21190	0.573304109	13.52909359	4.12E-39	7.15E-38	0.696165844	432	cg14648621	chr9	52751903	52751953	ZFHX4	3' UTR
21205	V21205	0.573286753	13.5285575	4.14E-39	7.15E-38	0.694035758	432	cg14655626	chr2	165015949	165015999	GTDC1	Intron (XM_012138353.2/GTDC1, intron 8 of 10)
25739	V25739	0.57301329	13.52011272	4.58E-39	7.86E-38	0.689193593	432	cg18252451	chr11	10583937	10583987	MED13	5' UTR
27702	V27702	0.572749661	13.51197537	5.05E-39	8.56E-38	0.688716361	432	cg19786420	chr10	26203862	26203912	MAB21L1	3' UTR
19948	V19948	0.572385388	13.50073749	5.78E-39	9.72E-38	0.696771115	432	cg13683938	chr15	78084129	78084179	CTNND1	Exon (XM_015101175.1/CTNND1, exon 4 of 24)
26566	V26566	0.571832265	13.48368688	7.08E-39	1.18E-37	0.690578732	432	cg18909565	chr13	15230479	15230529	USP6NL	Exon (XM_015099540.1/USP6NL, exon 12 of 17)
8670	V8670	0.571438147	13.47154753	8.18E-39	1.35E-37	0.687075147	432	cg04691460	chr1	24932461	24932511	FAF1	Intron (XM_004001957.3/FAF1, intron 7 of 18)
12482	V12482	0.571226939	13.46504541	8.84E-39	1.43E-37	0.691824192	432	cg07714037	chr1	233318958	233319008	MBNL1	3' UTR
26636	V26636	0.570569986	13.44483567	1.12E-38	1.79E-37	0.693139492	432	cg18966086	chr1	60476344	60476394	PRKACB	5' UTR
12764	V12764	0.570501162	13.44271976	1.15E-38	1.81E-37	0.704977186	432	cg07951445	chr1	74062989	74063039	DPYD	Intron (XM_004002217.3/DPYD, intron 3 of 22)
6812	V6812	0.57028424	13.43605235	1.25E-38	1.94E-37	0.696212403	432	cg03218461	chrX	42015801	42015851	KDM6A	Exon (XM_015104862.1/KDM6A, exon 19 of 31)
17839	V17839	0.570165388	13.43240028	1.30E-38	2.01E-37	0.701787876	432	cg12041353	chr2	69802484	69802534	SMARCA2	Promoter (<=1kb)
20473	V20473	0.569968533	13.42635298	1.40E-38	2.13E-37	0.67665751	432	cg14103663	chr13	80502046	80502096	ZNF217	Distal Intergenic
3564	V3564	0.569727184	13.41894158	1.53E-38	2.29E-37	0.711518763	432	cg00678608	chr22	32550335	32550385	TCF7L2	Intron (XM_015103420.1/TCF7L2, intron 7 of 14)
12129	V12129	0.569616859	13.41555469	1.59E-38	2.36E-37	0.712519788	432	cg07414561	chr2	68762505	68762555	DMRT3	Promoter (6-7kb)
342	V342	0.56950281	13.41205415	1.66E-38	2.45E-37	0.696154204	432	cg03435952	chr10	76341016	76341066	PCCA	Intron (XM_015098256.1/PCCA, intron 19 of 23)
26808	V26808	0.569460081	13.41074285	1.69E-38	2.47E-37	0.68493342	432	cg19111707	chr3	8736046	8736096	GARNL3	Promoter (<=1kb)
20342	V20342	0.56940825	13.40915232	1.72E-38	2.50E-37	0.6875291	432	cg13999128	chr14	41744052	41744102	TRNAG-CCC	Distal Intergenic
26420	V26420	0.569193683	13.40256942	1.86E-38	2.68E-37	0.739279728	432	cg18798512	chr19	39112199	39112249	PTPRG	Intron (XM_012100343.2/PTPRG, intron 16 of 30)
3284	V3284	0.568720106	13.38804852	2.21E-38	3.12E-37	0.687319583	432	cg00450910	chr18	40612654	40612704	HECTD1	Exon (XM_012098773.2/HECTD1, exon 10 of 42)
2563	V2563	0.568374303	13.37745278	2.50E-38	3.48E-37	0.68115048	432	cg26137606	chr26	12327692	12327742	TENM3	Exon (XM_015104513.1/TENM3, exon 13 of 41)
16196	V16196	0.568199951	13.37211277	2.66E-38	3.67E-37	0.689042276	432	cg10688581	chr7	29591333	29591383	MEIS2	Intron (XM_012181166.1/MEIS2, intron 10 of 12)
2661	V2661	0.567573983	13.35295371	3.34E-38	4.56E-37	0.710389701	432	cg27009703	chr4	68840545	68840595	HOXA9	Exon (XM_004007941.3/HOXA9, exon 1 of 2)
12976	V12976	0.567540314	13.35192378	3.38E-38	4.57E-37	0.688890958	432	cg08145628	chr20	10558993	10559043	SRSF3	Intron (XM_012100410.1/SRSF3, intron 3 of 5)
22500	V22500	0.56720461	13.34165769	3.82E-38	5.10E-37	0.685096378	432	cg15662374	chr10	32037755	32037805	PAN3	Exon (XM_012184657.1/PAN3, exon 17 of 19)
34060	V34060	0.567028288	13.33626797	4.07E-38	5.36E-37	0.696002887	432	cg24937433	chr5	104377725	104377775	FBXL17	Intron (XM_015095711.1/FBXL17, intron 8 of 10)
18773	V18773	0.566583356	13.3226745	4.78E-38	6.23E-37	0.680708166	432	cg12798053	chr3	9541908	9541958	MVB12B	Intron (XM_015094187.1/MVB12B, intron 7 of 9)
7242	V7242	0.566357344	13.31577327	5.18E-38	6.73E-37	0.691172362	432	cg03571234	chrX	28465892	28465942	DMD	Exon (XM_004021987.3/DMD, exon 10 of 16)
29036	V29036	0.566316401	13.31452339	5.26E-38	6.80E-37	0.685026539	432	cg20838828	chr1	73020216	73020266	PTBP2	Intron (XM_015092131.1/PTBP2, intron 9 of 13)
6595	V6595	0.565857969	13.30053426	6.20E-38	7.91E-37	0.72449716	432	cg03045876	chr7	73551358	73551408	HSPA2	Exon (XM_004010719.3/HSPA2, exon 1 of 1)
31569	V31569	0.565760729	13.29756833	6.43E-38	8.15E-37	0.69005494	432	cg22882174	chr26	32187380	32187430	FGFR1	Exon (XM_015104608.1/FGFR1, exon 10 of 20)
16834	V16834	0.56571838	13.2962768	6.52E-38	8.24E-37	0.684619145	432	cg11201836	chr5	55064354	55064404	TCERG1	Intron (XM_012179294.1/TCERG1, intron 12 of 21)
1280	V1280	0.56547872	13.28896946	7.11E-38	8.89E-37	0.677123103	432	cg12606075	chr8	56706522	56706572	MED23	Intron (XM_004011322.3/MED23, intron 11 of 29)
10492	V10492	0.565218041	13.28102456	7.81E-38	9.68E-37	0.703580408	432	cg06166972	chr2	152180805	152180855	NR4A2	5' UTR
11391	V11391	0.565096724	13.2773283	8.16E-38	1.01E-36	0.69517646	432	cg06835079	chr5	90408547	90408597	FAM172A	3' UTR
31348	V31348	0.564865392	13.27028212	8.86E-38	1.09E-36	0.687901574	432	cg22707003	chr15	56426878	56426928	BDNF	3' UTR
721	V721	0.564439785	13.25732559	1.03E-37	1.26E-36	0.705477698	432	cg07055193	chr1	24877406	24877456	FAF1	Intron (XM_004001957.3/FAF1, intron 8 of 18)
31433	V31433	0.564407312	13.2563374	1.04E-37	1.27E-36	0.698156253	432	cg22779638	chr1	24877416	24877466	FAF1	Intron (XM_004001957.3/FAF1, intron 8 of 18)
28868	V28868	0.564369761	13.25519474	1.06E-37	1.28E-36	0.684817022	432	cg20700930	chr2	165013568	165013618	GTDC1	Intron (XM_012138353.2/GTDC1, intron 7 of 10)
27599	V27599	0.563923957	13.24163474	1.24E-37	1.48E-36	0.683443524	432	cg19708963	chr8	47374419	47374469	BACH2	Intron (XM_015097380.1/BACH2, intron 2 of 5)
4197	V4197	0.563719706	13.23542536	1.34E-37	1.57E-36	0.680975882	432	cg01169651	chr1	38384782	38384832	ALG6	3' UTR
10419	V10419	0.563447949	13.22716702	1.47E-37	1.72E-36	0.712135674	432	cg06107587	chr6	96727394	96727444	HNRNPDL	3' UTR
29936	V29936	0.562959282	13.21232638	1.75E-37	1.99E-36	0.688634882	432	cg21553277	chr2	165078871	165078921	LOC101123186	Distal Intergenic
28545	V28545	0.562636529	13.20253103	1.96E-37	2.21E-36	0.690590372	432	cg20431509	chr3	170117996	170118046	ARL1	Promoter (<=1kb)
2037	V2037	0.562511458	13.19873662	2.05E-37	2.30E-36	0.686982028	432	cg20756283	chr2	192118511	192118561	GLS	5' UTR
26733	V26733	0.561604625	13.17124831	2.83E-37	3.08E-36	0.696130925	432	cg19057367	chrX	22165710	22165760	POLA1	Intron (XM_012106423.2/POLA1, intron 35 of 36)
20349	V20349	0.561453453	13.16666991	2.99E-37	3.23E-36	0.687622218	432	cg14002601	chr22	21396546	21396596	BTRC	Intron (XM_004020119.3/BTRC, intron 4 of 14)
33788	V33788	0.561246345	13.16039926	3.22E-37	3.44E-36	0.698924481	432	cg24691662	chr10	75903678	75903728	CLYBL	Intron (XM_012184910.1/CLYBL, intron 6 of 7)
1802	V1802	0.561216595	13.15949867	3.25E-37	3.46E-36	0.732679952	432	cg18291097	chr3	132549223	132549273	ATP5G2	Promoter (1-2kb)
9677	V9677	0.560764332	13.14581349	3.82E-37	4.00E-36	0.696968992	432	cg05500919	chr11	28244035	28244085	STX8	Intron (XM_015098649.1/STX8, intron 8 of 8)
5904	V5904	0.560597319	13.14076234	4.05E-37	4.21E-36	0.692720458	432	cg02494169	chr25	30996455	30996505	C25H10orf11	Intron (XM_012105395.2/C25H10orf11, intron 2 of 5)
2306	V2306	0.560553763	13.13944524	4.11E-37	4.26E-36	0.730386908	432	cg23543309	chr3	132549139	132549189	ATP5G2	Promoter (1-2kb)
21821	V21821	0.560245654	13.13013106	4.58E-37	4.68E-36	0.695339417	432	cg15116103	chrX	22103674	22103724	POLA1	Intron (XM_012106423.2/POLA1, intron 34 of 36)
21993	V21993	0.560150264	13.12724837	4.74E-37	4.80E-36	0.676913586	432	cg15248167	chrX	22038869	22038919	POLA1	Intron (XM_012106423.2/POLA1, intron 26 of 36)
16042	V16042	0.559623794	13.11134641	5.71E-37	5.76E-36	0.689240153	432	cg10573821	chr12	49694113	49694163	SPEN	Exon (XM_015099297.1/SPEN, exon 3 of 18)
37392	V37392	0.559447145	13.10601379	6.07E-37	6.11E-36	0.687121706	432	cg27604811	chr2	146494404	146494454	FAP	Intron (XM_004004657.3/FAP, intron 7 of 25)
13889	V13889	0.559403741	13.10470376	6.16E-37	6.13E-36	0.70216035	432	cg08864092	chr7	19063302	19063352	ARIH1	Exon (XM_015096710.1/ARIH1, exon 6 of 17)
30685	V30685	0.55934591	13.10295846	6.29E-37	6.24E-36	0.724846354	432	cg22158106	chr3	10483227	10483277	MAPKAP1	Intron (XM_012159507.2/MAPKAP1, intron 11 of 12)
14797	V14797	0.559226162	13.09934501	6.56E-37	6.48E-36	0.680917683	432	cg09562327	chrX	22237726	22237776	POLA1	3' UTR
16050	V16050	0.558676707	13.08277406	7.96E-37	7.71E-36	0.681697551	432	cg10583229	chr9	25768210	25768260	LOC106991345	Distal Intergenic
34480	V34480	0.558669904	13.08256899	7.98E-37	7.71E-36	0.679614024	432	cg25285123
16293	V16293	0.558403097	13.07452781	8.76E-37	8.41E-36	0.739349567	432	cg10763467	chr2	132942985	132943035	EVX2	Distal Intergenic
12200	V12200	0.558327395	13.07224689	9.00E-37	8.61E-36	0.67216454	432	cg07474202	chr6	20814973	20815023	CXXC4	Exon (XM_004009656.3/CXXC4, exon 5 of 5)
3502	V3502	0.557973337	13.06158278	1.02E-36	9.68E-36	0.689950182	432	cg00620527
3397	V3397	0.557925535	13.06014346	1.04E-36	9.81E-36	0.696480119	432	cg00543023	chr7	66555054	66555104	AP5M1	3' UTR
30332	V30332	0.557539586	13.04852667	1.19E-36	1.11E-35	0.690299376	432	cg21847690	chr14	37840919	37840969	LOC106991599	Intron (XR_001435702.1/LOC106991599, intron 2 of 4)
14177	V14177	0.557292161	13.04108318	1.29E-36	1.21E-35	0.686912189	432	cg09081420	chr18	60333368	60333418	LOC105603248	Exon (XR_001022295.2/LOC105603248, exon 1 of 2)
30316	V30316	0.557097674	13.03523436	1.38E-36	1.29E-35	0.746508055	432	cg21836698	chr22	42909411	42909461	NKX1-2	Intron (XM_015103305.1/NKX1-2, intron 1 of 5)
14573	V14573	0.556726393	13.02407386	1.57E-36	1.46E-35	0.691603036	432	cg09391013	chr3	41581955	41582005	MEIS1	Intron (XM_012168162.2/MEIS1, intron 11 of 11)
37066	V37066	0.556440955	13.0154983	1.74E-36	1.60E-35	0.689891982	432	cg27349047	chr23	54762856	54762906	TCF4	3' UTR
21341	V21341	0.556238597	13.00942115	1.87E-36	1.71E-35	0.692196666	432	cg14758136	chr15	41352341	41352391	EIF4G2	Exon (XM_012096549.1/EIF4G2, exon 10 of 23)
27284	V27284	0.556143809	13.00657522	1.93E-36	1.76E-35	0.680871124	432	cg19494088	chr3	10297025	10297075	MAPKAP1	Intron (XM_012159507.2/MAPKAP1, intron 3 of 12)
3460	V3460	0.55579031	12.99596542	2.18E-36	1.97E-35	0.725335227	432	cg00587168	chr2	136602700	136602750	DLX1	Distal Intergenic
395	V395	0.555588309	12.98990534	2.34E-36	2.11E-35	0.678217246	432	cg04050203	chrX	113674723	113674773	LOC101108550	3' UTR
26480	V26480	0.555532136	12.98822047	2.39E-36	2.14E-35	0.67854316	432	cg18851565	chr13	75243633	75243683	ZMYND8	Exon (XM_015099511.1/ZMYND8, exon 17 of 26)
22070	V22070	0.555406836	12.98446278	2.49E-36	2.23E-35	0.687273024	432	cg15309030	chr3	9602469	9602519	MVB12B	Intron (XM_015094187.1/MVB12B, intron 3 of 9)
23032	V23032	0.555045861	12.97364151	2.82E-36	2.49E-35	0.708015178	432	cg16079649	chr18	46328294	46328344	MIPOL1	Intron (XM_015101770.1/MIPOL1, intron 2 of 13)
22586	V22586	0.55488453	12.96880716	2.99E-36	2.62E-35	0.680230934	432	cg15722093	chr3	197706244	197706294	LOC105613112	Distal Intergenic
1462	V1462	0.55480823	12.96652124	3.07E-36	2.68E-35	0.681231958	432	cg14618517	chr7	9024806	9024856	AP3B1	Exon (XM_012180683.2/AP3B1, exon 17 of 27)
28738	V28738	0.554453038	12.95588349	3.47E-36	3.01E-35	0.669161468	432	cg20608335	chrX	101722503	101722553	GRIA3	3' UTR
6424	V6424	0.554335139	12.95235383	3.61E-36	3.13E-35	0.68751746	432	cg02904401	chr1	203393404	203393454	SOX2	Distal Intergenic
21838	V21838	0.55430634	12.95149174	3.65E-36	3.14E-35	0.687040227	432	cg15136704	chr2	165013573	165013623	GTDC1	Intron (XM_012138353.2/GTDC1, intron 7 of 10)
30306	V30306	0.554077374	12.94463921	3.95E-36	3.39E-35	0.688984077	432	cg21834164	chr7	66553678	66553728	AP5M1	3' UTR
24847	V24847	0.554013789	12.94273665	4.04E-36	3.45E-35	0.667694851	432	cg17523323	chr9	53299925	53299975	LOC105613955	Intron (XR_001042742.1/LOC105613955, intron 1 of 2)
19461	V19461	0.553555242	12.92902208	4.73E-36	4.03E-35	0.682756774	432	cg13308353	chr17	61597277	61597327	HECTD4	Exon (XM_012097892.2/HECTD4, exon 16 of 77)
14800	V14800	0.553533722	12.92837867	4.77E-36	4.05E-35	0.691905671	432	cg09564835	chr10	34121712	34121762	MTMR6	Exon (XM_012184679.2/MTMR6, exon 7 of 15)
17343	V17343	0.55332736	12.92221013	5.12E-36	4.31E-35	0.674411025	432	cg11628475	chr3	98106064	98106114	TMEM182	Distal Intergenic
13324	V13324	0.553099235	12.91539339	5.53E-36	4.64E-35	0.681208679	432	cg08416404	chr1	177733105	177733155	LOC105602007	Intron (XR_001020604.2/LOC105602007, intron 4 of 6)
26807	V26807	0.553091047	12.91514879	5.55E-36	4.64E-35	0.685678369	432	cg19111676	chr18	42065853	42065903	AKAP6	Intron (XM_004017884.2/AKAP6, intron 13 of 13)
12536	V12536	0.55301326	12.91282497	5.70E-36	4.75E-35	0.679323028	432	cg07764907	chr10	46697471	46697521	DACH1	Intron (XM_012184753.2/DACH1, intron 3 of 11)
54	V54	0.552606438	12.90067633	6.56E-36	5.44E-35	0.714451997	432	cg00549985	chr2	36802552	36802602	CNTFR	Intron (XM_015093062.1/CNTFR, intron 2 of 9)
16727	V16727	0.552187247	12.88816653	7.57E-36	6.22E-35	0.691544837	432	cg11119380	chr6	58720237	58720287	UBE2K	5' UTR
355	V355	0.552039629	12.88376317	7.97E-36	6.50E-35	0.688320607	432	cg03576422	chr13	35193703	35193753	WAC	Exon (XM_012188476.2/WAC, exon 1 of 11)
434	V434	0.552030325	12.88348568	7.99E-36	6.51E-35	0.676447993	432	cg04415471	chrX	29717244	29717294	DMD	Exon (XM_012106463.1/DMD, exon 41 of 78)
24103	V24103	0.551786684	12.87622041	8.69E-36	7.03E-35	0.689135394	432	cg16938552	chr1	35736578	35736628	LOC106990409	Distal Intergenic
6232	V6232	0.551629341	12.87152999	9.17E-36	7.40E-35	0.691894031	432	cg02739306	chr1	64672581	64672631	LOC101113557	Distal Intergenic
18427	V18427	0.551469838	12.8667764	9.69E-36	7.79E-35	0.684397989	432	cg12499300	chr4	81876134	81876184	VPS41	Distal Intergenic
33583	V33583	0.55141147	12.86503719	9.88E-36	7.93E-35	0.674143309	432	cg24514324	chr5	67951321	67951371	EBF1	Intron (XM_012178873.2/EBF1, intron 4 of 15)
3219	V3219	0.551299572	12.86170336	1.03E-35	8.21E-35	0.681662632	432	cg00389116	chr23	23791724	23791774	ASXL3	Exon (XM_015103606.1/ASXL3, exon 4 of 14)
28639	V28639	0.551153715	12.85735868	1.08E-35	8.61E-35	0.678671198	432	cg20512638	chr13	80502013	80502063	ZNF217	Distal Intergenic
16657	V16657	0.55097204	12.85194846	1.15E-35	9.13E-35	0.674899898	432	cg11065928	chrX	94874787	94874837	MOSPD1	Exon (XM_004022326.3/MOSPD1, exon 4 of 7)
5315	V5315	0.550918715	12.85036074	1.17E-35	9.22E-35	0.669417544	432	cg02047891	chr19	31090370	31090420	LOC105603445	Distal Intergenic
546	V546	0.550918536	12.85035542	1.17E-35	9.22E-35	0.667450414	432	cg05411495	chr1	120034167	120034217	SON	3' UTR
24303	V24303	0.55090539	12.84996404	1.18E-35	9.23E-35	0.679555825	432	cg17088899	chr3	144417926	144417976	YAF2	3' UTR
2132	V2132	0.550745296	12.84519829	1.24E-35	9.71E-35	0.678263805	432	cg21727711	chr10	53959167	53959217	POU4F1	Distal Intergenic
18215	V18215	0.550742649	12.84511949	1.24E-35	9.71E-35	0.688262408	432	cg12330929	chrX	38297057	38297107	USP9X	5' UTR
33180	V33180	0.550694374	12.84368266	1.26E-35	9.84E-35	0.700402738	432	cg24200199	chr10	15138722	15138772	LOC101102822	Exon (XM_015097968.1/LOC101102822, exon 5 of 6)
26725	V26725	0.550664679	12.8427989	1.28E-35	9.90E-35	0.705640656	432	cg19050854	chr7	14445147	14445197	SKOR1	Exon (XM_015096709.1/SKOR1, exon 8 of 10)
9114	V9114	0.550566871	12.83988828	1.32E-35	1.01E-34	0.684363069	432	cg05081855	chr18	45613491	45613541	LOC101105284	Distal Intergenic
3092	V3092	0.550550406	12.83939835	1.33E-35	1.02E-34	0.694338393	432	cg00281024	chrX	41970371	41970421	KDM6A	Exon (XM_015104862.1/KDM6A, exon 7 of 31)
36519	V36519	0.550200258	12.8289824	1.50E-35	1.14E-34	0.702439706	432	cg26912563	chr15	60684959	60685009	LOC105602422	Distal Intergenic
37354	V37354	0.549726735	12.81490551	1.76E-35	1.33E-34	0.702043952	432	cg27572510	chr11	13018803	13018853	ACACA	Intron (NM_001009256.1/ACACA, intron 50 of 57)
19860	V19860	0.549477182	12.80749106	1.91E-35	1.43E-34	0.688658162	432	cg13622501	chr14	37559542	37559592	ZFHX3	Intron (XM_015100188.1/ZFHX3, intron 5 of 14)
5930	V5930	0.549467586	12.80720599	1.92E-35	1.43E-34	0.698598566	432	cg02508227	chr8	36393185	36393235	ASCC3	Intron (XM_012182723.2/ASCC3, intron 34 of 41)
4731	V4731	0.549381175	12.80463935	1.98E-35	1.47E-34	0.676855387	432	cg01592346	chr5	90155722	90155772	LOC101121262	Distal Intergenic
19580	V19580	0.549015328	12.79377656	2.24E-35	1.64E-34	0.731155135	432	cg13400013	chr2	183123053	183123103	EN1	Promoter (<=1kb)
33217	V33217	0.54884485	12.78871683	2.37E-35	1.73E-34	0.689682466	432	cg24236358	chr7	3043032	3043082	KCNN2	Exon (XM_004010178.3/KCNN2, exon 11 of 16)
30999	V30999	0.548714796	12.7848578	2.48E-35	1.78E-34	0.685899525	432	cg22416088	chr10	32070521	32070571	PAN3	Intron (XM_012184657.1/PAN3, intron 5 of 18)
15331	V15331	0.548650215	12.78294181	2.53E-35	1.82E-34	0.69643356	432	cg09984378	chr1	120031113	120031163	SON	3' UTR
14346	V14346	0.548627628	12.78227173	2.55E-35	1.83E-34	0.685352454	432	cg09205019	chr18	13146420	13146470	RGMA	Intron (XM_015101876.1/RGMA, intron 2 of 8)
16163	V16163	0.54860042	12.78146461	2.58E-35	1.84E-34	0.681057361	432	cg10662112	chr2	144965289	144965339	FIGN	Intron (XM_012135549.2/FIGN, intron 1 of 1)
15094	V15094	0.548500158	12.77849066	2.67E-35	1.89E-34	0.676250116	432	cg09769383	chrX	22118513	22118563	POLA1	Intron (XM_012106423.2/POLA1, intron 34 of 36)
23725	V23725	0.548416807	12.77601864	2.74E-35	1.94E-34	0.69071841	432	cg16646236	chr3	41581968	41582018	MEIS1	Intron (XM_012168162.2/MEIS1, intron 11 of 11)
2427	V2427	0.54833331	12.77354266	2.82E-35	1.99E-34	0.67476022	432	cg24690041	chr16	41150438	41150488	ZFR	Exon (XM_015101330.1/ZFR, exon 9 of 22)
7214	V7214	0.548218573	12.7701408	2.93E-35	2.07E-34	0.714393798	432	cg03554099	chr19	30269304	30269354	FOXP1	Intron (XM_015102109.1/FOXP1, intron 3 of 17)
3006	V3006	0.548202049	12.76965093	2.95E-35	2.07E-34	0.679264829	432	cg00211423	chr7	14335867	14335917	MAP2K5	Intron (XM_004010259.3/MAP2K5, intron 17 of 21)
891	V891	0.548188021	12.76923505	2.96E-35	2.07E-34	0.682756774	432	cg08675781	chrX	77753158	77753208	ATP2B3	Exon (XM_015104982.1/ATP2B3, exon 19 of 20)
35010	V35010	0.547952886	12.76226574	3.21E-35	2.23E-34	0.684072074	432	cg25682293	chr1	249625174	249625224	LOC105604262	Distal Intergenic
19653	V19653	0.547932767	12.76166954	3.23E-35	2.24E-34	0.676401434	432	cg13457709	chrX	43808381	43808431	ARHGEF9	Exon (XM_012106573.2/ARHGEF9, exon 10 of 10)
4722	V4722	0.547760966	12.75657919	3.42E-35	2.37E-34	0.696910792	432	cg01586860	chr3	125695936	125695986	ATP2B1	Exon (XM_012174072.1/ATP2B1, exon 21 of 22)
17416	V17416	0.547523155	12.74953529	3.71E-35	2.55E-34	0.687028587	432	cg11686481	chr1	233314585	233314635	MBNL1	3' UTR
2263	V2263	0.547366495	12.74489651	3.91E-35	2.67E-34	0.688402086	432	cg23091758
7094	V7094	0.547180056	12.73937739	4.17E-35	2.83E-34	0.693127852	432	cg03462581	chr19	50194613	50194663	RBM5	Intron (XM_004018446.3/RBM5, intron 6 of 24)
6380	V6380	0.547072766	12.73620206	4.32E-35	2.93E-34	0.691172362	432	cg02864622	chr18	55546772	55546822	TRIP11	Intron (XM_012098941.2/TRIP11, intron 16 of 20)
10897	V10897	0.547061197	12.73585971	4.34E-35	2.93E-34	0.718933327	432	cg06488465	chr3	213884767	213884817	KDELR3	Promoter (6-7kb)
2284	V2284	0.547048239	12.73547625	4.36E-35	2.94E-34	0.737138002	432	cg23278196
26017	V26017	0.546785035	12.72768904	4.76E-35	3.19E-34	0.677658534	432	cg18464455	chr12	17960985	17961035	ESRRG	3' UTR
4432	V4432	0.546672383	12.72435705	4.94E-35	3.30E-34	0.682174783	432	cg01361776	chr12	68428410	68428460	RPS6KC1	Exon (XM_012187767.2/RPS6KC1, exon 7 of 10)
27766	V27766	0.546629167	12.72307899	5.02E-35	3.35E-34	0.691591396	432	cg19834403	chr11	28244053	28244103	STX8	Intron (XM_015098649.1/STX8, intron 8 of 8)
6867	V6867	0.546572424	12.72140101	5.11E-35	3.39E-34	0.68748254	432	cg03262217	chrX	22117175	22117225	POLA1	Intron (XM_012106423.2/POLA1, intron 34 of 36)
27740	V27740	0.546500066	12.71926147	5.24E-35	3.46E-34	0.685003259	432	cg19820403	chr2	51148981	51149031	ZCCHC7	Intron (XM_015093142.1/ZCCHC7, intron 6 of 8)
9220	V9220	0.546391781	12.71606009	5.44E-35	3.56E-34	0.700635534	432	cg05153898	chr7	14199741	14199791	MAP2K5	Intron (XM_012180834.2/MAP2K5, intron 4 of 17)
21950	V21950	0.546360271	12.71512861	5.49E-35	3.58E-34	0.689868703	432	cg15216622	chr1	114595109	114595159	PBX1	Intron (XM_012185380.2/PBX1, intron 2 of 9)
35348	V35348	0.546198484	12.7103467	5.80E-35	3.74E-34	0.688262408	432	cg25950972	chr1	45546413	45546463	SRSF11	Intron (XM_012173588.2/SRSF11, intron 3 of 12)
35976	V35976	0.546173394	12.70960523	5.85E-35	3.76E-34	0.678892355	432	cg26437066	chr2	233814937	233814987	RNF19B	Exon (XM_012149050.2/RNF19B, exon 6 of 13)
28002	V28002	0.54614559	12.7087836	5.90E-35	3.79E-34	0.683920756	432	cg20018063	chr17	6971579	6971629	LRBA	Intron (XM_015101368.1/LRBA, intron 37 of 56)
19012	V19012	0.546121802	12.70808065	5.95E-35	3.81E-34	0.696224043	432	cg12969847	chr22	22826017	22826067	NT5C2	Exon (XM_015103396.1/NT5C2, exon 2 of 18)
14605	V14605	0.545943385	12.70280924	6.32E-35	4.04E-34	0.681406556	432	cg09410305	chr15	61854198	61854248	CSTF3	Exon (XM_004016384.3/CSTF3, exon 3 of 21)
35371	V35371	0.545758875	12.69735935	6.72E-35	4.27E-34	0.674562343	432	cg25969685	chrX	61703668	61703718	HDAC8	Exon (XM_004022188.3/HDAC8, exon 5 of 11)
1776	V1776	0.545644115	12.69397046	6.99E-35	4.41E-34	0.693791321	432	cg18050634
28163	V28163	0.545493704	12.68952969	7.35E-35	4.62E-34	0.678275445	432	cg20150793	chr26	10872885	10872935	TENM3	Intron (XM_015104513.1/TENM3, intron 5 of 40)
30570	V30570	0.545457981	12.68847515	7.44E-35	4.66E-34	0.700612254	432	cg22044543	chr15	26815889	26815939	LOC105602190	Distal Intergenic
7879	V7879	0.545435072	12.68779891	7.50E-35	4.68E-34	0.707689263	432	cg04081874	chr1	120034242	120034292	SON	3' UTR
28200	V28200	0.545393218	12.68656351	7.60E-35	4.72E-34	0.682745135	432	cg20177885	chr11	48132666	48132716	SMURF2	5' UTR
831	V831	0.54531355	12.68421216	7.81E-35	4.84E-34	0.689472949	432	cg08073580	chr14	25710857	25710907	CNOT1	Exon (XM_004015040.2/CNOT1, exon 2 of 49)
12733	V12733	0.545308401	12.68406021	7.82E-35	4.84E-34	0.68556197	432	cg07922932	chr13	46903227	46903277	GPCPD1	Exon (XM_004014343.3/GPCPD1, exon 20 of 20)
12188	V12188	0.5451227	12.67858052	8.33E-35	5.12E-34	0.721133253	432	cg07459029	chr10	33297051	33297101	CDK8	Exon (XM_015098173.1/CDK8, exon 7 of 13)
8193	V8193	0.545116342	12.67839295	8.34E-35	5.12E-34	0.691812552	432	cg04327785	chr3	63191017	63191067	BCL11A	Promoter (6-7kb)
18463	V18463	0.545052441	12.67650774	8.52E-35	5.22E-34	0.702684142	432	cg12533321	chr3	12033164	12033214	DENND1A	Intron (XM_012163262.2/DENND1A, intron 9 of 20)
18764	V18764	0.545039377	12.67612236	8.56E-35	5.23E-34	0.701915914	432	cg12790916	chr9	40838240	40838290	YTHDF3	5' UTR
18169	V18169	0.54501809	12.6754944	8.62E-35	5.26E-34	0.683373685	432	cg12295581	chr5	46778020	46778070	FAM13B	Exon (XM_012178550.1/FAM13B, exon 4 of 26)
12666	V12666	0.544717424	12.66662715	9.54E-35	5.78E-34	0.674923177	432	cg07869104	chr10	39633837	39633887	LOC105613168	Downstream (<1kb)
3583	V3583	0.544714698	12.66654676	9.55E-35	5.78E-34	0.695560574	432	cg00695659	chr3	11846553	11846603	DENND1A	Intron (XM_012163262.2/DENND1A, intron 1 of 20)
7136	V7136	0.544700967	12.6661419	9.59E-35	5.80E-34	0.682838253	432	cg03488214	chr1	85175860	85175910	STXBP3	Exon (XM_004002262.3/STXBP3, exon 9 of 19)
7366	V7366	0.544633725	12.6641594	9.81E-35	5.92E-34	0.688890958	432	cg03665521	chr21	11942239	11942289	PCF11	Exon (XM_012101692.2/PCF11, exon 3 of 16)
32167	V32167	0.544611849	12.6635145	9.88E-35	5.95E-34	0.687214824	432	cg23360242	chr2	165036878	165036928	LOC101123186	Distal Intergenic
7494	V7494	0.544543791	12.66150822	1.01E-34	6.06E-34	0.690485613	432	cg03769961	chr10	69620379	69620429	LOC105616207	Distal Intergenic
20728	V20728	0.544368402	12.65633892	1.07E-34	6.40E-34	0.690858087	432	cg14309139	chr3	63923748	63923798	LOC106991019	Distal Intergenic
28810	V28810	0.544328248	12.65515567	1.09E-34	6.45E-34	0.67409675	432	cg20658987	chr14	25666727	25666777	CNOT1	Exon (XM_004015040.2/CNOT1, exon 39 of 49)
15717	V15717	0.544316666	12.65481436	1.09E-34	6.46E-34	0.6849567	432	cg10300862	chr16	20368175	20368225	LOC101108953	Exon (XM_012097210.2/LOC101108953, exon 11 of 19)
32740	V32740	0.544308705	12.65457979	1.09E-34	6.47E-34	0.696957352	432	cg23816206	chr9	38930881	38930931	RAB2A	Exon (XM_012183740.2/RAB2A, exon 5 of 8)
150	V150	0.544251837	12.65290414	1.11E-34	6.58E-34	0.678764317	432	cg01670345	chr16	14254158	14254208	ADAMTS6	Exon (XM_015101273.1/ADAMTS6, exon 15 of 25)
29757	V29757	0.54419638	12.65127023	1.14E-34	6.69E-34	0.689309992	432	cg21405047	chr3	149071773	149071823	CNOT2	Promoter (<=1kb)
10031	V10031	0.543941285	12.64375627	1.24E-34	7.22E-34	0.725870658	432	cg05797975	chr8	37270695	37270745	PRDM13	Promoter (2-3kb)
6916	V6916	0.543798543	12.63955299	1.30E-34	7.52E-34	0.680917683	432	cg03299228	chr2	180160956	180161006	DPP10	Intron (XM_012139676.2/DPP10, intron 19 of 26)
29895	V29895	0.543772272	12.63877951	1.31E-34	7.57E-34	0.664761617	432	cg21525931	chrX	98383154	98383204	LOC105605586	Distal Intergenic
13482	V13482	0.543646913	12.63508903	1.36E-34	7.83E-34	0.680335692	432	cg08549024	chr1	168426703	168426753	ALCAM	Intron (XM_012189447.2/ALCAM, intron 12 of 15)
6730	V6730	0.543583286	12.63321617	1.39E-34	7.98E-34	0.676878667	432	cg03160871	chr18	41381367	41381417	ARHGAP5	Exon (XM_012098787.2/ARHGAP5, exon 2 of 7)
34063	V34063	0.54346356	12.62969253	1.45E-34	8.27E-34	0.67668079	432	cg24938438	chr3	94747937	94747987	SFXN5	Intron (XM_004006070.3/SFXN5, intron 13 of 13)
19452	V19452	0.543462355	12.62965705	1.45E-34	8.27E-34	0.672932768	432	cg13302551	chr10	46697477	46697527	DACH1	Intron (XM_012184753.2/DACH1, intron 3 of 11)
35433	V35433	0.543447491	12.62921966	1.46E-34	8.30E-34	0.722192476	432	cg26025291	chr3	11772785	11772835	DENND1A	Exon (XR_001036573.1/LOC105612692, exon 2 of 2)
20751	V20751	0.543426362	12.62859788	1.47E-34	8.34E-34	0.687342862	432	cg14331586	chrX	73934275	73934325	DACH2	Intron (XM_012107022.2/DACH2, intron 1 of 12)
11606	V11606	0.543390033	12.62752889	1.49E-34	8.42E-34	0.674562343	432	cg07000752	chrX	121260804	121260854	TBC1D8B	Exon (XM_012107605.2/TBC1D8B, exon 11 of 21)
22933	V22933	0.543362604	12.62672181	1.50E-34	8.48E-34	0.689600987	432	cg16000161	chrX	118044552	118044602	AMMECR1	3' UTR
28613	V28613	0.543317958	12.62540821	1.52E-34	8.59E-34	0.677833132	432	cg20485582	chr5	43575191	43575241	DDX46	Intron (XM_012178516.2/DDX46, intron 12 of 22)
11985	V11985	0.543213762	12.62234286	1.58E-34	8.88E-34	0.685946084	432	cg07288292	chr7	66460661	66460711	LOC101114782	Distal Intergenic
10827	V10827	0.54311271	12.61937047	1.63E-34	9.14E-34	0.674166589	432	cg06439928	chrX	101722542	101722592	GRIA3	3' UTR
4712	V4712	0.543009296	12.61632908	1.69E-34	9.45E-34	0.703685166	432	cg01580681	chr2	106095646	106095696	HAND2	Promoter (<=1kb)
20550	V20550	0.542708798	12.60749423	1.86E-34	1.04E-33	0.678310364	432	cg14167922	chr12	53261260	53261310	RC3H1	3' UTR
33077	V33077	0.542565958	12.60329605	1.96E-34	1.08E-33	0.678787597	432	cg24104428	chr19	30568906	30568956	FOXP1	Intron (XM_015102109.1/FOXP1, intron 7 of 17)
1911	V1911	0.542449707	12.59988004	2.03E-34	1.12E-33	0.673782475	432	cg19452767	chr2	164256697	164256747	TRNAC-GCA	Distal Intergenic
16164	V16164	0.542405792	12.59858977	2.06E-34	1.14E-33	0.690357575	432	cg10662976	chr12	49079406	49079456	TMEM240	Exon (XM_015099063.1/TMEM240, exon 5 of 8)
28169	V28169	0.542310909	12.59580229	2.13E-34	1.17E-33	0.681511314	432	cg20155124	chr17	52518562	52518612	ZCCHC8	Exon (XM_004017335.3/ZCCHC8, exon 6 of 15)
4667	V4667	0.541974477	12.58592183	2.38E-34	1.30E-33	0.674632182	432	cg01537460	chr20	18590240	18590290	LOC105603718	Intron (XR_001023000.2/LOC105603718, intron 2 of 2)
31952	V31952	0.541968428	12.58574422	2.38E-34	1.30E-33	0.693605084	432	cg23185247	chrX	22237688	22237738	POLA1	3' UTR
8884	V8884	0.541951649	12.58525159	2.40E-34	1.30E-33	0.714871031	432	cg04879029	chr2	147255054	147255104	TBR1	Exon (XM_015093388.1/TBR1, exon 1 of 11)
28684	V28684	0.541888747	12.58340489	2.45E-34	1.32E-33	0.672292578	432	cg20556027	chr23	60808734	60808784	KIAA1468	Exon (XM_012103830.1/KIAA1468, exon 3 of 25)
20589	V20589	0.541884859	12.58329074	2.45E-34	1.32E-33	0.664005028	432	cg14201821	chrX	22051553	22051603	POLA1	Intron (XM_012106423.2/POLA1, intron 26 of 36)
25030	V25030	0.541733475	12.57884713	2.58E-34	1.39E-33	0.702218549	432	cg17660156	chr15	24413481	24413531	REXO2	Intron (XM_012095477.1/REXO2, intron 4 of 6)
24244	V24244	0.54172596	12.57862656	2.58E-34	1.39E-33	0.685969364	432	cg17040006	chr3	190496023	190496073	SOX5	Intron (XM_015094048.1/SOX5, intron 5 of 20)
11753	V11753	0.541673793	12.57709556	2.63E-34	1.41E-33	0.690962846	432	cg07107696	chr3	63504764	63504814	LOC106991019	Distal Intergenic
18926	V18926	0.541565546	12.57391907	2.72E-34	1.45E-33	0.687424341	432	cg12911636	chr9	41269495	41269545	LOC101112402	Distal Intergenic
7867	V7867	0.541398592	12.56902088	2.88E-34	1.53E-33	0.682046746	432	cg04067698	chr16	3004822	3004872	RANBP17	Intron (XM_012096710.1/RANBP17, intron 14 of 27)
16962	V16962	0.54135554	12.56775799	2.92E-34	1.55E-33	0.676541112	432	cg11297878	chr2	228788857	228788907	AGFG1	Exon (XM_015093575.1/AGFG1, exon 7 of 15)
27325	V27325	0.541346348	12.56748837	2.93E-34	1.55E-33	0.704406835	432	cg19524795	chr3	161856702	161856752	R3HDM2	Exon (XM_015094785.1/R3HDM2, exon 8 of 30)
5564	V5564	0.5413365	12.56719949	2.94E-34	1.55E-33	0.726929882	432	cg02221888	chr23	24613005	24613055	KLHL14	Exon (XM_015103607.1/KLHL14, exon 4 of 11)
31181	V31181	0.541270085	12.56525151	3.01E-34	1.58E-33	0.72894357	432	cg22560467	chr14	50115759	50115809	ZNF574	Distal Intergenic
29758	V29758	0.541198412	12.56314953	3.08E-34	1.61E-33	0.706036409	432	cg21405415	chr25	40554078	40554128	GRID1	Exon (XM_015104304.1/GRID1, exon 2 of 16)
28294	V28294	0.541134735	12.56128222	3.14E-34	1.64E-33	0.688716361	432	cg20252108	chr2	147265810	147265860	PSMD14	Intron (XM_012135814.1/PSMD14, intron 8 of 9)
20343	V20343	0.540632076	12.54654841	3.71E-34	1.92E-33	0.679974858	432	cg14000524	chrX	38317213	38317263	USP9X	Intron (XM_004022008.3/USP9X, intron 13 of 44)
17946	V17946	0.54051013	12.54297568	3.86E-34	2.00E-33	0.676622591	432	cg12130588	chr2	135698146	135698196	LOC101111776	Promoter (<=1kb)
13851	V13851	0.540470001	12.54180014	3.91E-34	2.02E-33	0.675970761	432	cg08833820	chr6	20814986	20815036	CXXC4	Exon (XM_004009656.3/CXXC4, exon 5 of 5)
34009	V34009	0.540340677	12.53801218	4.09E-34	2.10E-33	0.686597914	432	cg24893758	chr3	38767955	38768005	GFPT1	Intron (XM_015094292.1/GFPT1, intron 8 of 18)
26149	V26149	0.540305341	12.53697733	4.13E-34	2.12E-33	0.684141913	432	cg18568853	chr1	273636966	273637016	LOC105605081	Distal Intergenic
3246	V3246	0.540200937	12.53392	4.28E-34	2.18E-33	0.680696527	432	cg00422680	chr16	3182251	3182301	RANBP17	Intron (XM_012096710.1/RANBP17, intron 26 of 27)
22162	V22162	0.540114835	12.53139899	4.40E-34	2.24E-33	0.680382252	432	cg15377754	chr22	13245692	13245742	CPEB3	3' UTR
6619	V6619	0.54010816	12.53120358	4.41E-34	2.24E-33	0.680743086	432	cg03068133	chr14	4932027	4932077	WWOX	Intron (XM_012189589.2/WWOX, intron 8 of 8)
31323	V31323	0.539923963	12.52581158	4.69E-34	2.37E-33	0.689472949	432	cg22685742	chr14	37594311	37594361	ZFHX3	Intron (XM_015100188.1/ZFHX3, intron 8 of 14)
17544	V17544	0.539822334	12.52283726	4.85E-34	2.44E-33	0.67538877	432	cg11802088	chr12	19774080	19774130	LOC101121364	Promoter (4-5kb)
32595	V32595	0.539819773	12.5227623	4.85E-34	2.44E-33	0.671082037	432	cg23696633	chr3	98103290	98103340	TMEM182	Distal Intergenic
14174	V14174	0.539739252	12.52040608	4.98E-34	2.50E-33	0.701124406	432	cg09079366	chr22	32892616	32892666	HABP2	Distal Intergenic
911	V911	0.539722162	12.51990603	5.01E-34	2.51E-33	0.680382252	432	cg08850305	chr9	52751539	52751589	ZFHX4	3' UTR
23885	V23885	0.539678795	12.51863713	5.08E-34	2.54E-33	0.720423224	432	cg16761811	chr11	37434857	37434907	HOXB3	Promoter (2-3kb)
32988	V32988	0.539603279	12.51642782	5.21E-34	2.60E-33	0.69833085	432	cg24028501	chr12	75206426	75206476	NEK7	Intron (XM_012187872.2/NEK7, intron 7 of 8)
17820	V17820	0.539541712	12.51462681	5.32E-34	2.65E-33	0.67854316	432	cg12023786	chr7	30017665	30017715	LOC105610621	Distal Intergenic
23681	V23681	0.539516792	12.51389788	5.36E-34	2.66E-33	0.683722879	432	cg16607297	chr2	149198321	149198371	BAZ2B	Exon (XM_012136148.2/BAZ2B, exon 11 of 38)
36861	V36861	0.539425002	12.51121313	5.52E-34	2.74E-33	0.681185399	432	cg27169168	chr15	25154570	25154620	CADM1	3' UTR
15236	V15236	0.539170492	12.50377102	6.01E-34	2.97E-33	0.700018624	432	cg09892057	chr25	32048416	32048466	C25H10orf11	Intron (XM_012105396.2/C25H10orf11, intron 6 of 6)
35633	V35633	0.539156547	12.50336334	6.03E-34	2.98E-33	0.681604432	432	cg26170706	chr10	52641027	52641077	MYCBP2	Exon (XM_015097992.1/MYCBP2, exon 57 of 88)
2294	V2294	0.538993456	12.49859602	6.37E-34	3.13E-33	0.691789273	432	cg23425044	chr2	164256651	164256701	TRNAC-GCA	Distal Intergenic
15301	V15301	0.538941035	12.49706394	6.48E-34	3.18E-33	0.677996089	432	cg09955948	chr2	198659064	198659114	SF3B1	3' UTR
5981	V5981	0.538932562	12.49681633	6.49E-34	3.18E-33	0.67668079	432	cg02545350	chr2	235431225	235431275	PUM1	Exon (XM_004005047.2/PUM1, exon 6 of 22)
2761	V2761	0.538882239	12.4953457	6.60E-34	3.22E-33	0.682733495	432	cg00032045	chr2	238647241	238647291	AHDC1	Downstream (<1kb)
32914	V32914	0.538860179	12.49470108	6.65E-34	3.24E-33	0.68240758	432	cg23959331	chr1	184328134	184328184	GOLGB1	Exon (XM_012095455.2/GOLGB1, exon 7 of 22)
21696	V21696	0.538600875	12.48712531	7.24E-34	3.51E-33	0.689100475	432	cg15025366	chr14	22763622	22763672	IRX5	Distal Intergenic
19182	V19182	0.538575215	12.48637579	7.30E-34	3.52E-33	0.678985474	432	cg13100152	chr2	11211154	11211204	LOC105601865	Exon (XM_015092973.1/PTBP3, exon 2 of 15)
36165	V36165	0.538545926	12.48552031	7.37E-34	3.55E-33	0.686656113	432	cg26611924	chr5	90946365	90946415	KIAA0825	Intron (XM_012178948.1/KIAA0825, intron 21 of 21)
21093	V21093	0.538433685	12.48224231	7.65E-34	3.67E-33	0.675470249	432	cg14572170	chr1	168426765	168426815	ALCAM	Exon (XM_012189447.2/ALCAM, exon 13 of 16)
35162	V35162	0.538287499	12.47797378	8.03E-34	3.85E-33	0.68556197	432	cg25808130	chr7	65881034	65881084	TMEM260	Intron (XM_004010675.3/TMEM260, intron 4 of 16)
34446	V34446	0.538233335	12.47639247	8.17E-34	3.91E-33	0.692103548	432	cg25257390	chrX	22117323	22117373	POLA1	Intron (XM_012106423.2/POLA1, intron 34 of 36)
5953	V5953	0.538224921	12.47614684	8.19E-34	3.91E-33	0.68428159	432	cg02523045	chr8	5742545	5742595	PHIP	Intron (XM_012182425.1/PHIP, intron 10 of 34)
5375	V5375	0.538167108	12.47445916	8.35E-34	3.97E-33	0.700041903	432	cg02088759	chr23	44915693	44915743	SETBP1	3' UTR
23901	V23901	0.538080441	12.47192945	8.59E-34	4.08E-33	0.680184375	432	cg16769396	chrX	82637035	82637085	FMR1	Exon (XM_004022288.2/FMR1, exon 14 of 17)
30778	V30778	0.538063508	12.47143523	8.64E-34	4.10E-33	0.689752305	432	cg22234802	chr5	54838113	54838163	RBM27	Exon (XM_012178690.2/RBM27, exon 6 of 20)
25126	V25126	0.538035496	12.47061768	8.72E-34	4.13E-33	0.685329174	432	cg17744123	chr3	101999359	101999409	TSGA10	Exon (XM_012173796.1/TSGA10, exon 10 of 20)
9673	V9673	0.538011022	12.46990341	8.79E-34	4.15E-33	0.685154577	432	cg05496923	chr1	87341972	87342022	LRIF1	5' UTR
32161	V32161	0.537715204	12.46127224	9.68E-34	4.56E-33	0.678729398	432	cg23357264	chr2	148354365	148354415	LOC101109676	Downstream (1-2kb)
26097	V26097	0.537706541	12.46101953	9.71E-34	4.56E-33	0.690893007	432	cg18522382	chr11	17752499	17752549	SUZ12	Exon (XM_015098517.1/SUZ12, exon 18 of 18)
9741	V9741	0.537554594	12.45658767	1.02E-33	4.77E-33	0.680812925	432	cg05561610	chr2	184216017	184216067	PTPN4	Exon (XM_012140145.2/PTPN4, exon 21 of 25)
30517	V30517	0.537544516	12.45629377	1.02E-33	4.78E-33	0.66772977	432	cg22007739	chr1	103970546	103970596	ASH1L	3' UTR
1853	V1853	0.537425635	12.45282712	1.06E-33	4.94E-33	0.680731446	432	cg18715259	chr24	6525219	6525269	RBFOX1	Intron (XM_015103814.1/RBFOX1, intron 7 of 16)
27792	V27792	0.537359782	12.45090705	1.09E-33	5.03E-33	0.666693826	432	cg19856386	chr23	2894548	2894598	LOC106991864	Distal Intergenic
3536	V3536	0.537359228	12.45089092	1.09E-33	5.03E-33	0.674806779	432	cg00658736	chr1	24440329	24440379	ELAVL4	Exon (XM_012138023.2/ELAVL4, exon 7 of 7)
12166	V12166	0.537287803	12.44880862	1.11E-33	5.12E-33	0.676459633	432	cg07442283	chr2	138888877	138888927	BBS5	Exon (XM_015093374.1/BBS5, exon 5 of 12)
22517	V22517	0.537198343	12.44620086	1.15E-33	5.25E-33	0.692056989	432	cg15674058	chr18	56936699	56936749	UNC79	Exon (XM_012098963.2/UNC79, exon 3 of 52)
22475	V22475	0.537059646	12.44215853	1.20E-33	5.47E-33	0.673770835	432	cg15648495	chr3	64747650	64747700	LOC105612568	Exon (XR_001434300.1/LOC105612568, exon 5 of 5)
13982	V13982	0.536975455	12.43970518	1.23E-33	5.60E-33	0.684095353	432	cg08932358	chrX	54216919	54216969	RBM10	Exon (XM_012106808.1/RBM10, exon 5 of 23)
21879	V21879	0.53680775	12.43481919	1.30E-33	5.90E-33	0.665262129	432	cg15168457	chr17	54781985	54782035	ATXN2	Exon (XM_012097799.2/ATXN2, exon 9 of 23)
12893	V12893	0.536728618	12.43251415	1.34E-33	6.04E-33	0.678985474	432	cg08056859	chr6	102666683	102666733	JAKMIP1	Exon (XM_012180333.1/JAKMIP1, exon 15 of 15)
7932	V7932	0.536711059	12.4320027	1.34E-33	6.07E-33	0.672874569	432	cg04117529	chrX	48522171	48522221	WNK3	Exon (XM_012106629.2/WNK3, exon 8 of 23)
11137	V11137	0.536571256	12.42793115	1.41E-33	6.32E-33	0.685073098	432	cg06656383	chr7	14396692	14396742	MAP2K5	Intron (XM_004010259.3/MAP2K5, intron 21 of 21)
2853	V2853	0.53649952	12.42584227	1.44E-33	6.46E-33	0.678845796	432	cg00096813	chr1	21751059	21751109	FOXD2	Distal Intergenic
32705	V32705	0.536460331	12.42470121	1.46E-33	6.53E-33	0.689065555	432	cg23789062	chr7	28302875	28302925	LOC106991264	Distal Intergenic
19371	V19371	0.536398317	12.42289574	1.49E-33	6.64E-33	0.68368796	432	cg13242767	chrX	22117344	22117394	POLA1	Intron (XM_012106423.2/POLA1, intron 34 of 36)
1262	V1262	0.536378498	12.42231876	1.50E-33	6.67E-33	0.674189869	432	cg12441876	chrX	21342692	21342742	KLHL15	Exon (XM_004021970.3/KLHL15, exon 1 of 2)
9727	V9727	0.536375163	12.42222165	1.50E-33	6.67E-33	0.665297048	432	cg05546590	chr3	12742619	12742669	RC3H2	3' UTR
18993	V18993	0.536319116	12.42059011	1.53E-33	6.77E-33	0.67664587	432	cg12958319	chr15	41349804	41349854	EIF4G2	Exon (XM_012096549.1/EIF4G2, exon 5 of 23)
18575	V18575	0.536308895	12.42029259	1.53E-33	6.78E-33	0.723659093	432	cg12624088	chr14	4122895	4122945	ADAMTS18	Distal Intergenic
35066	V35066	0.536243556	12.41839072	1.56E-33	6.90E-33	0.682361021	432	cg25722914	chr20	45224653	45224703	TRNAC-ACA	Distal Intergenic
17698	V17698	0.536232891	12.41808029	1.57E-33	6.92E-33	0.734682	432	cg11923198	chr7	14445441	14445491	SKOR1	Intron (XM_015096709.1/SKOR1, intron 8 of 9)
5520	V5520	0.536178174	12.41648779	1.60E-33	7.03E-33	0.682756774	432	cg02190444	chr6	58736892	58736942	UBE2K	5' UTR
34934	V34934	0.536110728	12.414525	1.63E-33	7.17E-33	0.672106341	432	cg25632522	chr18	46328278	46328328	MIPOL1	Intron (XM_015101770.1/MIPOL1, intron 2 of 13)
1858	V1858	0.53606399	12.41316496	1.66E-33	7.27E-33	0.686330198	432	cg18755005	chr15	75415236	75415286	CELF1	3' UTR
29129	V29129	0.535983313	12.41081753	1.70E-33	7.44E-33	0.682232983	432	cg20925941	chr1	234638826	234638876	MED12L	Exon (XM_015092592.1/MED12L, exon 24 of 44)
20323	V20323	0.535955008	12.40999404	1.72E-33	7.50E-33	0.675446969	432	cg13985028	chr2	16818519	16818569	LOC105606824	Intron (XR_001026843.2/LOC105606824, intron 1 of 1)
2202	V2202	0.535949862	12.40984432	1.72E-33	7.50E-33	0.679369587	432	cg22406308	chr2	164468802	164468852	ZEB2	Intron (XM_012138277.2/ZEB2, intron 7 of 14)
21673	V21673	0.535933552	12.40936982	1.73E-33	7.53E-33	0.682011826	432	cg15006883	chr2	155805990	155806040	PRPF40A	Exon (XM_012137139.2/PRPF40A, exon 18 of 26)
27138	V27138	0.535869702	12.40751233	1.77E-33	7.67E-33	0.689088835	432	cg19377176	chr22	22973699	22973749	PCGF6	Intron (XM_004020155.3/PCGF6, intron 4 of 9)
5724	V5724	0.535805992	12.40565913	1.80E-33	7.79E-33	0.727197598	432	cg02342576	chr7	29322948	29322998	C7H15orf41	Intron (XM_012181163.2/C7H15orf41, intron 3 of 8)
31537	V31537	0.535802963	12.40557102	1.81E-33	7.79E-33	0.733739175	432	cg22859252	chr25	30906891	30906941	ZNF503	Promoter (3-4kb)
6236	V6236	0.535476175	12.39606812	2.01E-33	8.62E-33	0.68623708	432	cg02740381	chr7	82349460	82349510	LIN52	Intron (XM_004010784.2/LIN52, intron 5 of 5)
7345	V7345	0.535438193	12.39496392	2.03E-33	8.72E-33	0.689635907	432	cg03647331	chr20	35807144	35807194	CDKAL1	Intron (XM_015102823.1/CDKAL1, intron 8 of 13)
33975	V33975	0.535414131	12.39426443	2.05E-33	8.77E-33	0.690823168	432	cg24865098	chr25	33772103	33772153	LOC105605020	Distal Intergenic
18500	V18500	0.535378954	12.39324187	2.07E-33	8.84E-33	0.693279169	432	cg12565017	chr3	210387897	210387947	TSPAN9	Promoter (<=1kb)
15349	V15349	0.535001051	12.38225998	2.34E-33	9.93E-33	0.677495577	432	cg09995778	chr10	26560683	26560733	NBEA	Exon (XM_015098122.1/NBEA, exon 3 of 59)
23500	V23500	0.534969143	12.38133302	2.37E-33	1.00E-32	0.695048422	432	cg16464310	chr1	273366662	273366712	SATB1	Intron (XM_015092727.1/SATB1, intron 4 of 9)
18068	V18068	0.53489185	12.37908776	2.43E-33	1.03E-32	0.688588323	432	cg12221314	chr18	44626387	44626437	RALGAPA1	Intron (XM_012098818.1/RALGAPA1, intron 31 of 33)
24229	V24229	0.534813975	12.37682583	2.49E-33	1.05E-32	0.728734053	432	cg17030233	chr2	183123040	183123090	EN1	Promoter (<=1kb)
37163	V37163	0.534574434	12.36986994	2.69E-33	1.12E-32	0.693733122	432	cg27417842	chr6	60943124	60943174	BEND4	Distal Intergenic
29346	V29346	0.534499855	12.36770479	2.76E-33	1.15E-32	0.671757147	432	cg21098134	chrX	81908242	81908292	AFF2	Intron (XM_015105000.1/AFF2, intron 3 of 20)
18247	V18247	0.534394425	12.36464438	2.85E-33	1.19E-32	0.665995437	432	cg12366082	chr10	46495553	46495603	DACH1	3' UTR
30583	V30583	0.534377489	12.36415282	2.87E-33	1.19E-32	0.673363442	432	cg22058025	chr23	3646953	3647003	ZNF407	Intron (XM_015103570.1/ZNF407, intron 7 of 9)
28520	V28520	0.534347582	12.36328481	2.89E-33	1.20E-32	0.694466431	432	cg20416421	chr15	75413127	75413177	LOC101118130	Downstream (1-2kb)
35945	V35945	0.534237828	12.36009963	3.00E-33	1.24E-32	0.698261011	432	cg26418874	chr24	7907839	7907889	C24H16orf72	Exon (XM_015104074.1/C24H16orf72, exon 5 of 5)
14473	V14473	0.534182515	12.35849457	3.05E-33	1.26E-32	0.676564391	432	cg09312038	chr22	21673038	21673088	MGEA5	Exon (XM_015103386.1/MGEA5, exon 17 of 17)
21715	V21715	0.534171365	12.35817105	3.06E-33	1.26E-32	0.684467828	432	cg15042350	chr3	65308566	65308616	LOC105612569	Distal Intergenic
31729	V31729	0.534130633	12.35698922	3.10E-33	1.27E-32	0.674154949	432	cg23015538	chr2	242422440	242422490	HNRNPR	Distal Intergenic
27315	V27315	0.534126043	12.35685605	3.11E-33	1.27E-32	0.697294906	432	cg19517256	chr3	125419971	125420021	DUSP6	Downstream (1-2kb)
2770	V2770	0.533979859	12.35261516	3.26E-33	1.33E-32	0.683804358	432	cg00037518	chr7	27707308	27707358	LOC105615667	Distal Intergenic
16352	V16352	0.533838597	12.34851792	3.41E-33	1.39E-32	0.689682466	432	cg10815883	chr7	14335911	14335961	MAP2K5	Intron (XM_004010259.3/MAP2K5, intron 17 of 21)
34548	V34548	0.533781435	12.34686023	3.48E-33	1.42E-32	0.676995065	432	cg25338703	chr1	35946800	35946850	NFIA	Intron (XM_012160811.2/NFIA, intron 2 of 10)
13575	V13575	0.533775794	12.34669665	3.48E-33	1.42E-32	0.700181581	432	cg08618538	chr9	56401450	56401500	ZBTB10	Exon (XM_004011759.3/ZBTB10, exon 3 of 7)
27501	V27501	0.533735808	12.34553713	3.53E-33	1.44E-32	0.681813949	432	cg19639202	chr1	24932439	24932489	FAF1	Intron (XM_004001957.3/FAF1, intron 7 of 18)
19207	V19207	0.533565978	12.34061322	3.73E-33	1.51E-32	0.684456188	432	cg13116439	chr11	46328177	46328227	TLK2	Exon (XM_015098857.1/TLK2, exon 6 of 22)
20020	V20020	0.533526645	12.33947301	3.77E-33	1.53E-32	0.689216873	432	cg13746386	chr6	69452820	69452870	CHIC2	Intron (XM_004009829.2/CHIC2, intron 4 of 5)
10872	V10872	0.533414518	12.33622296	3.91E-33	1.58E-32	0.682186423	432	cg06470132	chr22	21678617	21678667	MGEA5	Intron (XM_015103386.1/MGEA5, intron 12 of 16)
7737	V7737	0.533398489	12.33575839	3.93E-33	1.59E-32	0.715720737	432	cg03953623	chr1	227148841	227148891	RSRC1	Intron (XM_012100645.2/RSRC1, intron 5 of 9)
5548	V5548	0.533346158	12.33424178	4.00E-33	1.61E-32	0.687261384	432	cg02208929	chr18	10702899	10702949	LOC105603050	Distal Intergenic
26534	V26534	0.533341271	12.33410014	4.01E-33	1.61E-32	0.689729025	432	cg18886838	chr12	42863231	42863281	RERE	Intron (XM_015099047.1/RERE, intron 4 of 20)
1174	V1174	0.533310743	12.33321547	4.05E-33	1.63E-32	0.751536456	432	cg11626190	chr1	104916120	104916170	MEF2D	Exon (XM_015092302.1/MEF2D, exon 3 of 14)
18196	V18196	0.533304336	12.33302982	4.05E-33	1.63E-32	0.673014247	432	cg12315723	chr1	53686070	53686120	FUBP1	3' UTR
19536	V19536	0.533264724	12.33188197	4.11E-33	1.65E-32	0.683187448	432	cg13366314	chr2	84334185	84334235	BNC2	Intron (XM_015093230.1/BNC2, intron 3 of 3)
12416	V12416	0.533251273	12.33149221	4.12E-33	1.65E-32	0.687342862	432	cg07666807	chr2	207129329	207129379	INO80D	Exon (XM_012143523.2/INO80D, exon 3 of 12)
19885	V19885	0.533227711	12.33080949	4.15E-33	1.66E-32	0.673386721	432	cg13644618	chr14	25696755	25696805	CNOT1	Exon (XM_004015040.2/CNOT1, exon 11 of 49)
28750	V28750	0.533222909	12.33067033	4.16E-33	1.66E-32	0.664237825	432	cg20615391	chr15	46131972	46132022	FAM160A2	Exon (XM_004016214.3/FAM160A2, exon 11 of 13)
13956	V13956	0.533143265	12.3283628	4.27E-33	1.70E-32	0.692918335	432	cg08909571	chr18	66580697	66580747	EIF5	Exon (XM_015102061.1/EIF5, exon 3 of 11)
10763	V10763	0.533117772	12.32762427	4.30E-33	1.71E-32	0.685818046	432	cg06392275	chr1	189623841	189623891	DLG1	Exon (XM_012096642.2/DLG1, exon 14 of 22)
28413	V28413	0.533113433	12.32749856	4.31E-33	1.71E-32	0.695060061	432	cg20347779	chr2	152180686	152180736	NR4A2	Exon (XM_004004686.2/NR4A2, exon 3 of 8)
15415	V15415	0.533085918	12.32670148	4.35E-33	1.73E-32	0.679020393	432	cg10053369	chr12	40988964	40989014	CASZ1	Intron (XM_015099220.1/CASZ1, intron 2 of 14)
9350	V9350	0.533010154	12.32450681	4.46E-33	1.76E-32	0.696282242	432	cg05238736	chr16	12487681	12487731	MAST4	Exon (XM_012096813.2/MAST4, exon 11 of 32)
29082	V29082	0.532991257	12.32395944	4.48E-33	1.77E-32	0.689216873	432	cg20884304	chr2	165574355	165574405	ARHGAP15	Intron (XM_004004720.3/ARHGAP15, intron 6 of 13)
16581	V16581	0.532919549	12.32188254	4.59E-33	1.81E-32	0.683455163	432	cg11007685	chr7	29259619	29259669	C7H15orf41	Intron (XM_012181163.2/C7H15orf41, intron 1 of 8)
30807	V30807	0.53282226	12.3190651	4.73E-33	1.86E-32	0.6798701	432	cg22252312	chr5	47929627	47929677	MATR3	Exon (XM_012178586.1/MATR3, exon 6 of 18)
37247	V37247	0.532772887	12.31763545	4.81E-33	1.89E-32	0.697655741	432	cg27491295	chr2	163990499	163990549	LOC105609180	Distal Intergenic
2106	V2106	0.532754532	12.31710398	4.84E-33	1.90E-32	0.673119005	432	cg21460081
20081	V20081	0.532692676	12.31531304	4.94E-33	1.93E-32	0.676459633	432	cg13791425	chr3	11569285	11569335	LHX2	Distal Intergenic
24707	V24707	0.532692395	12.31530492	4.94E-33	1.93E-32	0.670825961	432	cg17407609	chrX	22051562	22051612	POLA1	Intron (XM_012106423.2/POLA1, intron 26 of 36)
33135	V33135	0.532676964	12.31485816	4.96E-33	1.93E-32	0.673770835	432	cg24152915	chr21	24034286	24034336	DBX1	Promoter (<=1kb)
24586	V24586	0.532640798	12.31381113	5.02E-33	1.95E-32	0.682617097	432	cg17311369	chr4	64999270	64999320	NEUROD6	Distal Intergenic
2801	V2801	0.532607657	12.31285175	5.07E-33	1.96E-32	0.694932023	432	cg00059897	chr1	24877373	24877423	FAF1	Intron (XM_004001957.3/FAF1, intron 8 of 18)
22281	V22281	0.53257636	12.31194578	5.12E-33	1.98E-32	0.676156998	432	cg15476781	chr12	18204205	18204255	ESRRG	5' UTR
10463	V10463	0.532571813	12.31181416	5.13E-33	1.98E-32	0.694454791	432	cg06144427	chr6	96662338	96662388	HNRNPD	Exon (XR_001434856.1/HNRNPD, exon 9 of 10)
24637	V24637	0.532507649	12.3099569	5.24E-33	2.02E-32	0.680161095	432	cg17348621	chr2	148840430	148840480	39142	Exon (XM_004004673.3/MARCH7, exon 8 of 9)
25607	V25607	0.532357742	12.3056185	5.50E-33	2.11E-32	0.718013782	432	cg18141729	chr4	68754608	68754658	EVX1	Distal Intergenic
29645	V29645	0.532339242	12.30508315	5.53E-33	2.12E-32	0.674539063	432	cg21316226	chr3	173554334	173554384	KIAA1033	Exon (XM_004006690.3/KIAA1033, exon 29 of 33)
3660	V3660	0.532323072	12.30461526	5.56E-33	2.13E-32	0.685794767	432	cg00753411	chr8	28770910	28770960	LACE1	Intron (XM_015097361.1/LACE1, intron 8 of 12)
6888	V6888	0.532294599	12.30379139	5.61E-33	2.15E-32	0.680102896	432	cg03274732	chr10	46880760	46880810	DACH1	Intron (XM_012184753.2/DACH1, intron 1 of 11)
6031	V6031	0.532282415	12.30343884	5.63E-33	2.15E-32	0.673910513	432	cg02582218	chr3	64452920	64452970	LOC105612568	Distal Intergenic
13277	V13277	0.532280873	12.30339423	5.63E-33	2.15E-32	0.696096005	432	cg08379111	chr4	53774924	53774974	FOXP2	Exon (XM_012176772.1/FOXP2, exon 11 of 18)
14302	V14302	0.532264949	12.30293348	5.66E-33	2.16E-32	0.70792206	432	cg09176054	chr17	62315103	62315153	MSI1	Intron (XM_015101673.1/MSI1, intron 4 of 12)
17167	V17167	0.532167957	12.30012739	5.84E-33	2.21E-32	0.675086135	432	cg11470772	chr25	30951263	30951313	C25H10orf11	Intron (XM_012105395.2/C25H10orf11, intron 2 of 5)
19418	V19418	0.532167922	12.30012638	5.84E-33	2.21E-32	0.696806034	432	cg13279718	chr22	30390137	30390187	SHOC2	Exon (XM_004020195.3/SHOC2, exon 2 of 9)
11349	V11349	0.53215134	12.29964666	5.87E-33	2.22E-32	0.682756774	432	cg06797643	chr1	142792511	142792561	ROBO2	Intron (XM_012187741.2/ROBO2, intron 2 of 28)
20952	V20952	0.532089392	12.29785468	5.99E-33	2.26E-32	0.694966943	432	cg14466787	chr22	32069492	32069542	VTI1A	Intron (XM_012102940.2/VTI1A, intron 6 of 7)
6717	V6717	0.532044762	12.29656375	6.08E-33	2.28E-32	0.688960797	432	cg03152095
11947	V11947	0.532044055	12.2965433	6.08E-33	2.28E-32	0.668265202	432	cg07265167	chr25	778648	778698	ACTA1	Exon (XM_004021341.2/ACTA1, exon 4 of 7)
8157	V8157	0.532001978	12.29532631	6.16E-33	2.31E-32	0.660594562	432	cg04302128	chrX	93105296	93105346	RBMX	3' UTR
35599	V35599	0.532000123	12.29527266	6.17E-33	2.31E-32	0.684106993	432	cg26149292	chr9	74555314	74555364	UBR5	Exon (XM_015097892.1/UBR5, exon 9 of 59)
35410	V35410	0.531933857	12.29335621	6.30E-33	2.35E-32	0.682361021	432	cg26010091	chrX	53842530	53842580	SYN1	3' UTR
32080	V32080	0.531903299	12.2924725	6.36E-33	2.37E-32	0.671279914	432	cg23282125	chr1	20895327	20895377	MKNK1	Intron (XM_015091954.1/MKNK1, intron 4 of 11)
6535	V6535	0.531855979	12.29110415	6.46E-33	2.41E-32	0.682558897	432	cg02987967	chr19	30398914	30398964	FOXP1	Intron (XM_015102109.1/FOXP1, intron 5 of 17)
32875	V32875	0.531849497	12.29091671	6.47E-33	2.41E-32	0.675493528	432	cg23929585	chr17	7330611	7330661	LRBA	Intron (XM_015101368.1/LRBA, intron 51 of 56)
11621	V11621	0.531805254	12.28963746	6.56E-33	2.44E-32	0.692033709	432	cg07010334	chr3	46651690	46651740	USP34	Exon (XM_015094329.1/USP34, exon 74 of 79)
23198	V23198	0.531788376	12.28914946	6.60E-33	2.45E-32	0.682442499	432	cg16202181	chr2	138485826	138485876	UBR3	Intron (XM_015093369.1/UBR3, intron 30 of 39)
10623	V10623	0.531665482	12.28559654	6.86E-33	2.54E-32	0.678787597	432	cg06271247	chr10	8382886	8382936	LOC101121613	Distal Intergenic
33568	V33568	0.531658469	12.28539383	6.88E-33	2.55E-32	0.672944408	432	cg24505211	chrX	38297087	38297137	USP9X	5' UTR
7451	V7451	0.531556234	12.28243868	7.11E-33	2.62E-32	0.711600242	432	cg03726556	chr2	183122796	183122846	EN1	Promoter (<=1kb)
30977	V30977	0.531468431	12.27990107	7.31E-33	2.69E-32	0.688448645	432	cg22392274	chr5	86047189	86047239	LOC105615321	Distal Intergenic
915	V915	0.531401007	12.27795267	7.47E-33	2.74E-32	0.687831735	432	cg08912986	chr4	68865706	68865756	HOXA3	Intron (XR_001039954.2/HOXA9, intron 2 of 2)
26073	V26073	0.531318083	12.2755566	7.67E-33	2.81E-32	0.70213707	432	cg18501647	chr20	26279526	26279576	PRRT1	Exon (XM_015102776.1/PRRT1, exon 4 of 5)
4193	V4193	0.53109851	12.26921355	8.23E-33	3.00E-32	0.672048142	432	cg01167862	chr13	50804330	50804380	ATRN	Exon (XM_012188729.2/ATRN, exon 26 of 29)
27143	V27143	0.531077686	12.26861209	8.29E-33	3.02E-32	0.68365304	432	cg19381434	chr25	31330925	31330975	C25H10orf11	Intron (XM_012105395.2/C25H10orf11, intron 2 of 5)
26897	V26897	0.530999301	12.26634826	8.50E-33	3.09E-32	0.680393891	432	cg19184757	chr1	234638849	234638899	MED12L	Exon (XM_015092592.1/MED12L, exon 24 of 44)
18289	V18289	0.530979927	12.26578875	8.55E-33	3.11E-32	0.66772977	432	cg12393130	chr6	13163785	13163835	NEUROG2	Promoter (<=1kb)
32363	V32363	0.530945072	12.26478222	8.65E-33	3.14E-32	0.681045721	432	cg23514247	chr1	227288078	227288128	RSRC1	Intron (XM_012100645.2/RSRC1, intron 3 of 9)
16676	V16676	0.530830242	12.26146657	8.97E-33	3.25E-32	0.721691964	432	cg11077188	chr12	31530486	31530536	AKT3	Intron (XM_012187197.2/AKT3, intron 1 of 11)
27522	V27522	0.530763655	12.25954415	9.16E-33	3.31E-32	0.676413074	432	cg19656359	chr7	9094119	9094169	AP3B1	Intron (XM_012180683.2/AP3B1, intron 6 of 26)
22405	V22405	0.530745811	12.25902904	9.21E-33	3.32E-32	0.695420896	432	cg15582951	chr9	56401555	56401605	ZBTB10	Exon (XM_004011759.3/ZBTB10, exon 3 of 7)
7787	V7787	0.530713778	12.25810431	9.31E-33	3.35E-32	0.685922805	432	cg03993410	chr1	224875284	224875334	KPNA4	3' UTR
23391	V23391	0.530673758	12.25694908	9.43E-33	3.39E-32	0.678612999	432	cg16367356	chr3	69899459	69899509	PSME4	Exon (XM_015094386.1/PSME4, exon 3 of 48)
25834	V25834	0.530603153	12.25491116	9.64E-33	3.46E-32	0.699064159	432	cg18324267	chr12	59550740	59550790	ACBD6	Intron (XM_012187663.1/ACBD6, intron 6 of 7)
13873	V13873	0.530580587	12.25425986	9.71E-33	3.48E-32	0.659733215	432	cg08852769	chr19	43342227	43342277	SLMAP	3' UTR
22592	V22592	0.530500789	12.2519569	9.96E-33	3.56E-32	0.694128876	432	cg15725174	chr7	9026003	9026053	AP3B1	Exon (XM_012180683.2/AP3B1, exon 16 of 27)
17451	V17451	0.53046314	12.25087046	1.01E-32	3.59E-32	0.71937564	432	cg11716762	chr3	132155231	132155281	HOXC4	Promoter (<=1kb)
32359	V32359	0.530451957	12.25054776	1.01E-32	3.60E-32	0.687610578	432	cg23507610	chr14	21461335	21461385	RPGRIP1L	Intron (XM_012189787.2/RPGRIP1L, intron 3 of 25)
14078	V14078	0.530395277	12.24891228	1.03E-32	3.66E-32	0.684106993	432	cg09002189	chr23	54966797	54966847	TCF4	Intron (XM_015103775.1/TCF4, intron 1 of 15)
21727	V21727	0.530385676	12.24863526	1.03E-32	3.67E-32	0.685631809	432	cg15046674	chr3	85360300	85360350	HNRNPLL	Exon (XM_015094428.1/HNRNPLL, exon 6 of 13)
33629	V33629	0.530338709	12.24728017	1.05E-32	3.72E-32	0.679485986	432	cg24557648	chr23	3733814	3733864	ZNF407	Intron (XM_015103570.1/ZNF407, intron 4 of 9)
32232	V32232	0.530331304	12.24706653	1.05E-32	3.72E-32	0.691637955	432	cg23413592	chr3	10324733	10324783	MAPKAP1	Intron (XM_012159507.2/MAPKAP1, intron 5 of 12)
16267	V16267	0.530328494	12.24698547	1.05E-32	3.72E-32	0.670395288	432	cg10740273	chr2	27918425	27918475	LOC101111349	Exon (XM_015093026.1/LOC101111349, exon 12 of 20)
23005	V23005	0.530289184	12.24585136	1.07E-32	3.76E-32	0.67666915	432	cg16054600	chr4	9599333	9599383	ANKIB1	Exon (XM_004007711.3/ANKIB1, exon 15 of 20)
26680	V26680	0.530285621	12.24574859	1.07E-32	3.76E-32	0.650398082	432	cg18998268	chr2	36801314	36801364	CNTFR	Intron (XM_015093062.1/CNTFR, intron 2 of 9)
27305	V27305	0.5301459	12.24171823	1.12E-32	3.93E-32	0.698645125	432	cg19511760	chr6	83989861	83989911	YTHDC1	Exon (XM_012180082.2/YTHDC1, exon 12 of 17)
31399	V31399	0.530069262	12.2395079	1.14E-32	4.02E-32	0.68559689	432	cg22751689	chr2	230923672	230923722	TRIP12	Exon (XM_012147961.2/TRIP12, exon 16 of 40)
1350	V1350	0.529973521	12.23674694	1.18E-32	4.14E-32	0.675842723	432	cg13378802	chr1	120034182	120034232	SON	3' UTR
27499	V27499	0.529951324	12.23610689	1.19E-32	4.16E-32	0.679136791	432	cg19638215	chr7	43362520	43362570	HERC1	Exon (XM_012181379.2/HERC1, exon 45 of 79)
16892	V16892	0.529940289	12.23578871	1.19E-32	4.17E-32	0.675179253	432	cg11236345	chr1	24441397	24441447	ELAVL4	3' UTR
32790	V32790	0.529816818	12.23222886	1.24E-32	4.33E-32	0.673037527	432	cg23846762	chr7	48214312	48214362	RNF111	Exon (XM_012181436.1/RNF111, exon 9 of 14)
18486	V18486	0.529774259	12.23100195	1.26E-32	4.39E-32	0.710401341	432	cg12556490	chr7	8892418	8892468	LOC105615610	Distal Intergenic
18803	V18803	0.529714115	12.22926828	1.28E-32	4.46E-32	0.686970388	432	cg12819630	chr2	47723865	47723915	NR4A3	Intron (XM_012120268.1/NR4A3, intron 3 of 7)
36853	V36853	0.52953713	12.22416744	1.35E-32	4.71E-32	0.663981749	432	cg27161939	chr3	152954330	152954380	GRIP1	Intron (XM_015094035.1/GRIP1, intron 2 of 24)
11354	V11354	0.529501403	12.2231379	1.37E-32	4.76E-32	0.671396313	432	cg06801233	chr7	16116542	16116592	KIF23	Exon (XM_015096843.1/KIF23, exon 20 of 24)
10266	V10266	0.529419593	12.22078066	1.41E-32	4.87E-32	0.656055033	432	cg05985562	chrX	52082671	52082721	CLCN5	3' UTR
6153	V6153	0.529321718	12.21796087	1.45E-32	5.01E-32	0.6798701	432	cg02675830	chr6	69449265	69449315	CHIC2	Exon (XM_004009829.2/CHIC2, exon 6 of 6)
7458	V7458	0.529098758	12.21153893	1.56E-32	5.36E-32	0.671815346	432	cg03734252	chr3	27985238	27985288	PUM2	5' UTR
961	V961	0.52903897	12.20981721	1.59E-32	5.45E-32	0.672781451	432	cg09513654	chr22	32524336	32524386	TCF7L2	Intron (XM_015103420.1/TCF7L2, intron 5 of 14)
27850	V27850	0.5289805	12.20813357	1.62E-32	5.54E-32	0.680312413	432	cg19902869	chr7	63897430	63897480	GMFB	Exon (XM_004010658.2/GMFB, exon 4 of 7)
4401	V4401	0.528978111	12.20806478	1.62E-32	5.54E-32	0.666379551	432	cg01341452	chr10	46700106	46700156	DACH1	Intron (XM_012184753.2/DACH1, intron 3 of 11)
3122	V3122	0.528929145	12.20665496	1.64E-32	5.62E-32	0.673037527	432	cg00300224	chrX	18846018	18846068	CNKSR2	Exon (XM_012106396.1/CNKSR2, exon 15 of 20)
29901	V29901	0.52885618	12.20455431	1.68E-32	5.73E-32	0.703545488	432	cg21528412	chr9	43721122	43721172	SGK3	Exon (XM_012183791.2/SGK3, exon 9 of 17)
10566	V10566	0.528748741	12.20146157	1.74E-32	5.91E-32	0.670756123	432	cg06223553	chr1	198510385	198510435	EIF4A2	3' UTR
24659	V24659	0.528747616	12.2014292	1.74E-32	5.91E-32	0.676133718	432	cg17363691	chr6	43530409	43530459	PPARGC1A	Intron (XM_015096414.1/PPARGC1A, intron 1 of 12)
6850	V6850	0.52872152	12.20067806	1.76E-32	5.94E-32	0.689228513	432	cg03249015	chr18	48106047	48106097	FBXO33	3' UTR
26157	V26157	0.528719397	12.20061697	1.76E-32	5.94E-32	0.684654065	432	cg18582738	chr2	146392328	146392378	IFIH1	Intron (XM_004004655.2/IFIH1, intron 3 of 15)
25078	V25078	0.528659872	12.19890378	1.79E-32	6.05E-32	0.682465779	432	cg17701227	chr2	134569041	134569091	CIR1	Intron (XM_004023448.3/CIR1, intron 7 of 11)
758	V758	0.528656359	12.19880267	1.79E-32	6.05E-32	0.695618773	432	cg07434287	chr2	164443499	164443549	ZEB2	Intron (XM_012138277.2/ZEB2, intron 4 of 14)
21547	V21547	0.528653161	12.19871064	1.79E-32	6.05E-32	0.678845796	432	cg14915305	chr5	86756385	86756435	TRNAS-GGA	Distal Intergenic
21491	V21491	0.528571342	12.19635606	1.84E-32	6.20E-32	0.694059037	432	cg14878567	chr10	54190765	54190815	RNF219	Exon (XM_012184819.1/RNF219, exon 7 of 7)
19583	V19583	0.5285644	12.19615628	1.85E-32	6.20E-32	0.685620169	432	cg13401972	chr9	1767356	1767406	RIMS1	Exon (XM_012184227.2/RIMS1, exon 15 of 39)
37031	V37031	0.528418475	12.19195763	1.93E-32	6.49E-32	0.691416799	432	cg27310935	chr17	61765544	61765594	NAA25	Exon (XM_004017405.3A25, exon 16 of 24)
8702	V8702	0.528403395	12.19152377	1.94E-32	6.51E-32	0.690520533	432	cg04719986	chr11	13070779	13070829	ACACA	Intron (NM_001009256.1/ACACA, intron 41 of 57)
384	V384	0.528388709	12.19110129	1.95E-32	6.54E-32	0.730549865	432	cg03843584	chr3	132549158	132549208	ATP5G2	Promoter (1-2kb)
13921	V13921	0.528167243	12.18473108	2.09E-32	6.99E-32	0.686551355	432	cg08882563	chr1	97524212	97524262	LOC105612134	Distal Intergenic
15332	V15332	0.527987514	12.17956294	2.22E-32	7.38E-32	0.708771766	432	cg09984613	chr3	4032866	4032916	AK8	Intron (XM_004005577.2/AK8, intron 11 of 12)
15629	V15629	0.52797181	12.1791114	2.23E-32	7.40E-32	0.692697179	432	cg10238356	chrX	98980905	98980955	LAMP2	Exon (XM_004022350.3/LAMP2, exon 9 of 9)
35667	V35667	0.527961497	12.17881492	2.23E-32	7.42E-32	0.68557361	432	cg26205390	chr17	35152061	35152111	KIAA1109	Exon (XM_012097536.2/KIAA1109, exon 9 of 88)
413	V413	0.527902925	12.17713102	2.28E-32	7.55E-32	0.679101872	432	cg04181115	chr16	37098554	37098604	NIPBL	Intron (XM_004017042.3/NIPBL, intron 46 of 46)
35114	V35114	0.527783198	12.17368941	2.36E-32	7.83E-32	0.70596657	432	cg25764105	chr15	60659749	60659799	PAX6	Intron (XM_012096162.1/PAX6, intron 6 of 11)
5405	V5405	0.527725357	12.17202697	2.41E-32	7.96E-32	0.699355154	432	cg02106733	chr1	189623031	189623081	DLG1	Exon (XM_004003023.3/DLG1, exon 14 of 21)
27854	V27854	0.527715204	12.17173517	2.42E-32	7.97E-32	0.686667753	432	cg19907120	chr8	39697662	39697712	KLHL32	Intron (XM_012182745.1/KLHL32, intron 4 of 8)
12153	V12153	0.527691168	12.17104437	2.43E-32	8.02E-32	0.682500698	432	cg07434650	chr4	80056821	80056871	INHBA	Distal Intergenic
34198	V34198	0.527597146	12.16834245	2.51E-32	8.24E-32	0.668148803	432	cg25047559	chr2	164443490	164443540	ZEB2	Intron (XM_012138277.2/ZEB2, intron 4 of 14)
26561	V26561	0.527368221	12.16176537	2.70E-32	8.83E-32	0.670115933	432	cg18906876	chr5	90946713	90946763	KIAA0825	Intron (XM_012178948.1/KIAA0825, intron 21 of 21)
33301	V33301	0.527261577	12.15870222	2.79E-32	9.10E-32	0.709970668	432	cg24290768	chr4	53446137	53446187	MDFIC	Intron (XM_015095294.1/MDFIC, intron 1 of 2)
32256	V32256	0.527216473	12.15740683	2.83E-32	9.22E-32	0.675772884	432	cg23434499	chr7	66637788	66637838	NAA30	Exon (XM_015097090.1A30, exon 1 of 3)
7487	V7487	0.527132222	12.15498736	2.90E-32	9.46E-32	0.692033709	432	cg03761512	chr7	29740150	29740200	MEIS2	Intron (XM_012181166.1/MEIS2, intron 8 of 12)
37415	V37415	0.527080958	12.15351532	2.95E-32	9.60E-32	0.675726325	432	cg27629266	chrX	22256586	22256636	ARX	Promoter (3-4kb)
8615	V8615	0.527044394	12.15246548	2.99E-32	9.70E-32	0.69580501	432	cg04647605	chr3	10297408	10297458	MAPKAP1	Exon (XM_012159507.2/MAPKAP1, exon 4 of 13)
16416	V16416	0.526986657	12.15080782	3.04E-32	9.87E-32	0.671617469	432	cg10874705	chr11	8032732	8032782	MSI2	3' UTR
34978	V34978	0.526964442	12.15017003	3.06E-32	9.93E-32	0.679509265	432	cg25658543	chr15	41352757	41352807	EIF4G2	Exon (XM_012096549.1/EIF4G2, exon 12 of 23)
24299	V24299	0.526774506	12.144718	3.25E-32	1.05E-31	0.687401062	432	cg17086562	chr14	5237754	5237804	WWOX	Intron (XM_012189589.2/WWOX, intron 8 of 8)
9700	V9700	0.526689832	12.14228794	3.34E-32	1.07E-31	0.687610578	432	cg05524292	chr23	37871584	37871634	DLGAP1	Exon (XM_004020502.2/DLGAP1, exon 11 of 11)
6921	V6921	0.526604588	12.13984185	3.43E-32	1.10E-31	0.697201788	432	cg03303633	chr2	164468728	164468778	ZEB2	Intron (XM_012138277.2/ZEB2, intron 7 of 14)
23817	V23817	0.526590486	12.13943723	3.45E-32	1.11E-31	0.676785548	432	cg16712916	chr3	65269223	65269273	LOC105612569	Distal Intergenic
29716	V29716	0.526487994	12.13649664	3.56E-32	1.14E-31	0.700670453	432	cg21372540	chrX	22136778	22136828	POLA1	Intron (XM_012106423.2/POLA1, intron 35 of 36)
30257	V30257	0.526434346	12.13495762	3.62E-32	1.16E-31	0.683897476	432	cg21800177	chr4	29810331	29810381	SP8	Distal Intergenic
7549	V7549	0.526409029	12.13423137	3.65E-32	1.17E-31	0.679974858	432	cg03812924	chr14	48143434	48143484	SAMD4B	Intron (XM_015100575.1/SAMD4B, intron 12 of 12)
32712	V32712	0.526247364	12.1295945	3.84E-32	1.22E-31	0.711367446	432	cg23793869
24538	V24538	0.526206537	12.12842367	3.89E-32	1.24E-31	0.697620821	432	cg17263916	chr5	47962612	47962662	PAIP2	3' UTR
22183	V22183	0.526201997	12.1282935	3.89E-32	1.24E-31	0.695281218	432	cg15395261	chr1	273383369	273383419	SATB1	Intron (XM_015092727.1/SATB1, intron 1 of 9)
32869	V32869	0.526176137	12.12755194	3.93E-32	1.25E-31	0.740653227	432	cg23925685	chr2	51407337	51407387	PAX5	5' UTR
15143	V15143	0.526099051	12.12534157	4.02E-32	1.28E-31	0.675249092	432	cg09810328	chr5	24510996	24511046	37681	Exon (XM_004008661.3/MARCH3, exon 2 of 5)
17906	V17906	0.526080996	12.12482388	4.04E-32	1.28E-31	0.673817395	432	cg12097135	chr12	17552611	17552661	USH2A	Intron (XM_015099153.1/USH2A, intron 20 of 71)
29067	V29067	0.52606874	12.12447249	4.06E-32	1.29E-31	0.678717758	432	cg20866050	chr11	39384096	39384146	MED1	Exon (XM_004012840.3/MED1, exon 2 of 17)
35345	V35345	0.526049444	12.12391926	4.08E-32	1.29E-31	0.690823168	432	cg25947654	chr7	8979455	8979505	AP3B1	Intron (XM_012180683.2/AP3B1, intron 22 of 26)
18584	V18584	0.526046405	12.12383214	4.09E-32	1.29E-31	0.677239501	432	cg12633563	chr2	161576009	161576059	LOC101114685	Distal Intergenic
3002	V3002	0.525965711	12.12151877	4.19E-32	1.32E-31	0.6862138	432	cg00208586	chr25	34153269	34153319	LOC105605022	Distal Intergenic
16842	V16842	0.525940459	12.12079489	4.23E-32	1.33E-31	0.671780426	432	cg11205960	chr15	59870249	59870299	LOC101111830	Intron (XM_012096149.2/LOC101111830, intron 19 of 37)
17255	V17255	0.525938036	12.12072542	4.23E-32	1.33E-31	0.715813856	432	cg11551236	chr2	51407396	51407446	PAX5	5' UTR
12736	V12736	0.525935853	12.12066284	4.23E-32	1.33E-31	0.719003166	432	cg07928068	chr12	31530732	31530782	AKT3	Intron (XM_012187197.2/AKT3, intron 1 of 11)
4189	V4189	0.525777167	12.11611454	4.45E-32	1.38E-31	0.669068349	432	cg01166712
35070	V35070	0.525576823	12.11037371	4.74E-32	1.47E-31	0.692289785	432	cg25727636	chr4	102655465	102655515	LOC101105324	5' UTR
14464	V14464	0.525546183	12.10949587	4.79E-32	1.48E-31	0.676808828	432	cg09300383	chr1	215889587	215889637	MECOM	Intron (XM_012099727.1/MECOM, intron 2 of 15)
15800	V15800	0.525537115	12.1092361	4.80E-32	1.49E-31	0.720399944	432	cg10391541
36549	V36549	0.52548061	12.10761735	4.88E-32	1.51E-31	0.689891982	432	cg26929453	chr2	207129343	207129393	INO80D	Exon (XM_012143523.2/INO80D, exon 3 of 12)
23437	V23437	0.525472718	12.10739127	4.90E-32	1.51E-31	0.676319955	432	cg16413525	chr3	27974947	27974997	PUM2	Exon (XM_015094239.1/PUM2, exon 3 of 20)
17616	V17616	0.525354348	12.1040007	5.08E-32	1.57E-31	0.689053916	432	cg11850995	chr2	163990445	163990495	LOC105609180	Distal Intergenic
16817	V16817	0.525325167	12.10316493	5.13E-32	1.58E-31	0.683175808	432	cg11187272	chr2	65420766	65420816	TRPM3	Exon (XM_012123226.2/TRPM3, exon 7 of 27)
26284	V26284	0.525292622	12.10223286	5.18E-32	1.59E-31	0.655938635	432	cg18686900	chr3	75876748	75876798	FOXN2	Promoter (<=1kb)
22560	V22560	0.525214508	12.09999589	5.31E-32	1.63E-31	0.685201136	432	cg15702079
14761	V14761	0.525191719	12.09934334	5.35E-32	1.64E-31	0.682617097	432	cg09537600	chr16	37098200	37098250	NIPBL	Exon (XM_004017042.3/NIPBL, exon 47 of 47)
29134	V29134	0.52516859	12.09868105	5.39E-32	1.65E-31	0.663225161	432	cg20928877	chr14	41311299	41311349	LOC101116502	Distal Intergenic
30569	V30569	0.525150871	12.09817371	5.42E-32	1.66E-31	0.684747183	432	cg22044223	chr22	20624808	20624858	LOC105604251	Distal Intergenic
8504	V8504	0.525098338	12.09666958	5.51E-32	1.68E-31	0.686050843	432	cg04570692	chr1	272373948	272373998	TBC1D5	Intron (XM_015092720.1/TBC1D5, intron 3 of 25)
23968	V23968	0.525027763	12.09464908	5.63E-32	1.71E-31	0.69326753	432	cg16821706	chr2	134778080	134778130	OLA1	Intron (XM_012133444.2/OLA1, intron 7 of 10)
8616	V8616	0.524903314	12.09108668	5.85E-32	1.78E-31	0.669161468	432	cg04647787	chrX	22165245	22165295	POLA1	Intron (XM_012106423.2/POLA1, intron 35 of 36)
33175	V33175	0.524849212	12.08953819	5.95E-32	1.80E-31	0.682919732	432	cg24195523	chrX	21983839	21983889	POLA1	Exon (XM_012106423.2/POLA1, exon 21 of 37)
11490	V11490	0.524816808	12.08861082	6.02E-32	1.82E-31	0.674702021	432	cg06910030	chr22	37612974	37613024	FAM204A	Distal Intergenic
4743	V4743	0.524750519	12.08671377	6.14E-32	1.85E-31	0.673991992	432	cg01599973	chr2	82217230	82217280	NFIB	Intron (NM_001267879.1/NFIB, intron 6 of 7)
29691	V29691	0.524703354	12.08536412	6.23E-32	1.88E-31	0.671803706	432	cg21352559	chr18	34996502	34996552	LOC101122557	Distal Intergenic
33162	V33162	0.52467595	12.08458001	6.29E-32	1.89E-31	0.675493528	432	cg24183320	chr20	23346815	23346865	LOC106991807	Distal Intergenic
31499	V31499	0.524556754	12.0811697	6.53E-32	1.96E-31	0.695642052	432	cg22823874	chr4	33154011	33154061	DMTF1	Exon (XM_015095235.1/DMTF1, exon 8 of 18)
7240	V7240	0.524492825	12.07934088	6.66E-32	2.00E-31	0.681604432	432	cg03569436	chr1	273637191	273637241	LOC105605081	Distal Intergenic
24308	V24308	0.524309455	12.07409616	7.05E-32	2.11E-31	0.682442499	432	cg17092728	chr10	32106203	32106253	PAN3	Exon (XM_012184657.1/PAN3, exon 4 of 19)
20561	V20561	0.524177555	12.07032446	7.35E-32	2.19E-31	0.691114163	432	cg14175847	chr8	55370643	55370693	L3MBTL3	Exon (XM_004011311.2/L3MBTL3, exon 5 of 23)
18446	V18446	0.524103373	12.06820351	7.52E-32	2.24E-31	0.68109228	432	cg12515253	chr1	275243213	275243263	KAT2B	Intron (XM_015091780.1/KAT2B, intron 21 of 21)
29790	V29790	0.524068448	12.06720504	7.60E-32	2.26E-31	0.682977931	432	cg21426641	chr9	71412346	71412396	ZFPM2	Intron (XM_004011795.3/ZFPM2, intron 4 of 6)
35254	V35254	0.524031993	12.0661629	7.69E-32	2.29E-31	0.677449018	432	cg25873624	chr1	67372807	67372857	LOC106990848	Distal Intergenic
3701	V3701	0.524016317	12.06571476	7.73E-32	2.30E-31	0.678403483	432	cg00785632	chr2	138485780	138485830	UBR3	Intron (XM_015093369.1/UBR3, intron 30 of 39)
31926	V31926	0.523851785	12.06101203	8.14E-32	2.41E-31	0.679276469	432	cg23166004	chr25	32294910	32294960	LOC106991576	Distal Intergenic
8256	V8256	0.5237904	12.05925777	8.29E-32	2.46E-31	0.691055964	432	cg04385386	chr8	24322279	24322329	LOC105613116	Distal Intergenic
6989	V6989	0.523742629	12.05789268	8.42E-32	2.49E-31	0.669370984	432	cg03366658	chr19	42095004	42095054	C19H3orf67	Distal Intergenic
31863	V31863	0.52369547	12.05654518	8.54E-32	2.52E-31	0.673107366	432	cg23116972	chr14	40280660	40280710	ZNF536	Intron (XM_015100543.1/ZNF536, intron 9 of 9)
35108	V35108	0.523682274	12.05616815	8.58E-32	2.53E-31	0.678473322	432	cg25760286
29230	V29230	0.523665167	12.05567937	8.62E-32	2.54E-31	0.683431884	432	cg21001818	chr2	151518402	151518452	TRNAC-GCA	Distal Intergenic
15986	V15986	0.523646426	12.05514392	8.67E-32	2.55E-31	0.683105969	432	cg10529588	chr7	75886788	75886838	GPHN	Exon (XM_015097125.1/GPHN, exon 20 of 26)
18269	V18269	0.523545239	12.05225314	8.95E-32	2.63E-31	0.701729677	432	cg12379857	chr14	22118241	22118291	LOC105608131	Promoter (1-2kb)
5085	V5085	0.523504247	12.05108219	9.07E-32	2.66E-31	0.671210075	432	cg01878181	chr18	62577030	62577080	BCL11B	Distal Intergenic
4041	V4041	0.523472598	12.05017815	9.16E-32	2.69E-31	0.666612348	432	cg01050866	chr15	25625382	25625432	LOC105602182	Distal Intergenic
36625	V36625	0.523447267	12.04945462	9.23E-32	2.71E-31	0.674888258	432	cg26984621	chr26	24249104	24249154	TNKS	Exon (XM_004021749.3/TNKS, exon 5 of 27)
26447	V26447	0.523329143	12.046081	9.58E-32	2.80E-31	0.679288109	432	cg18822250	chrX	94121647	94121697	LOC101105554	3' UTR
11199	V11199	0.523293915	12.04507499	9.68E-32	2.83E-31	0.686469876	432	cg06701757	chr12	34840964	34841014	ATP1B1	3' UTR
4508	V4508	0.523280803	12.04470055	9.72E-32	2.84E-31	0.653017041	432	cg01427367	chr3	175871559	175871609	RTCB	Exon (XM_004006705.3/RTCB, exon 7 of 12)
6230	V6230	0.523251922	12.04387587	9.81E-32	2.86E-31	0.683629761	432	cg02736176	chr3	45033146	45033196	EHBP1	Intron (XM_004005849.3/EHBP1, intron 21 of 25)
7791	V7791	0.523231001	12.04327849	9.87E-32	2.88E-31	0.693744762	432	cg03999123	chr8	39357888	39357938	LOC105611309	Intron (XR_001435020.1/LOC105611309, intron 1 of 4)
20294	V20294	0.523204906	12.0425334	9.95E-32	2.90E-31	0.672734892	432	cg13964563	chr22	41723874	41723924	LOC101102859	Distal Intergenic
31074	V31074	0.523043272	12.03791887	1.05E-31	3.04E-31	0.671163516	432	cg22484639	chr25	28098395	28098445	DDIT4	Promoter (<=1kb)
29387	V29387	0.523021121	12.03728659	1.05E-31	3.06E-31	0.687913214	432	cg21131771	chrX	113674734	113674784	LOC101108550	3' UTR
17105	V17105	0.522932814	12.03476603	1.08E-31	3.14E-31	0.697946736	432	cg11421980	chr10	69620749	69620799	LOC105616207	Distal Intergenic
11258	V11258	0.52290619	12.03400615	1.09E-31	3.16E-31	0.680649967	432	cg06743643	chrX	21342678	21342728	KLHL15	Exon (XM_004021970.3/KLHL15, exon 1 of 2)
2124	V2124	0.522899647	12.0338194	1.09E-31	3.17E-31	0.692848496	432	cg21639828	chr1	37477002	37477052	DOCK7	Exon (XM_012164017.2/DOCK7, exon 13 of 39)
21856	V21856	0.522862807	12.03276803	1.11E-31	3.20E-31	0.669266226	432	cg15155511	chr10	2940614	2940664	DIAPH3	Intron (XM_015098041.1/DIAPH3, intron 28 of 28)
9895	V9895	0.522836018	12.03200353	1.12E-31	3.22E-31	0.687424341	432	cg05686715	chr7	8926833	8926883	AP3B1	Intron (XM_012180683.2/AP3B1, intron 26 of 26)
27297	V27297	0.522811446	12.03130232	1.13E-31	3.24E-31	0.683234007	432	cg19506450	chr3	149001329	149001379	CNOT2	Exon (XM_012174561.2/CNOT2, exon 10 of 13)
19333	V19333	0.522801149	12.03100849	1.13E-31	3.24E-31	0.678042648	432	cg13219248	chr23	54869621	54869671	TCF4	Intron (XM_015103776.1/TCF4, intron 3 of 14)
27291	V27291	0.522778867	12.03037266	1.14E-31	3.26E-31	0.675004656	432	cg19500162	chr1	29128462	29128512	USP24	Intron (XM_015092007.1/USP24, intron 59 of 70)
22750	V22750	0.522748637	12.02951007	1.15E-31	3.29E-31	0.675505168	432	cg15850080	chr15	41353339	41353389	EIF4G2	Exon (XM_012096549.1/EIF4G2, exon 14 of 23)
29948	V29948	0.522744864	12.02940239	1.15E-31	3.29E-31	0.676564391	432	cg21565988	chr1	114748333	114748383	LOC105612471	Distal Intergenic
12250	V12250	0.522653187	12.02678669	1.18E-31	3.38E-31	0.696666356	432	cg07520168	chr12	31647286	31647336	AKT3	Intron (XM_012187197.2/AKT3, intron 8 of 11)
24787	V24787	0.522608759	12.02551923	1.20E-31	3.42E-31	0.699110718	432	cg17470118	chr5	67919709	67919759	EBF1	Intron (XM_012178873.2/EBF1, intron 6 of 15)
15156	V15156	0.522597402	12.02519522	1.20E-31	3.43E-31	0.67790297	432	cg09820365	chr24	29937854	29937904	LOC105604757	Distal Intergenic
24488	V24488	0.522508597	12.02266201	1.24E-31	3.52E-31	0.682989571	432	cg17226346	chr20	8756978	8757028	C20H6orf106	Exon (XM_015102663.1/C20H6orf106, exon 3 of 5)
6735	V6735	0.522478509	12.02180378	1.25E-31	3.54E-31	0.677670174	432	cg03163457	chr18	48106625	48106675	FBXO33	3' UTR
13361	V13361	0.522332952	12.01765257	1.31E-31	3.70E-31	0.674853338	432	cg08448119
34388	V34388	0.522252296	12.01535263	1.34E-31	3.79E-31	0.684642425	432	cg25200027	chr20	18750163	18750213	RUNX2	Exon (XM_015102729.1/RUNX2, exon 7 of 11)
26123	V26123	0.522228777	12.01468205	1.35E-31	3.81E-31	0.668020765	432	cg18543597	chr17	17105225	17105275	SCOC	Distal Intergenic
2283	V2283	0.522186618	12.01348004	1.37E-31	3.85E-31	0.690974486	432	cg23268451	chr7	8667376	8667426	TBCA	Intron (XM_015096795.1/TBCA, intron 1 of 3)
2517	V2517	0.52211767	12.01151437	1.40E-31	3.93E-31	0.671058758	432	cg25612765	chr1	97524290	97524340	LOC105612134	Distal Intergenic
26374	V26374	0.52208939	12.01070818	1.41E-31	3.96E-31	0.704814229	432	cg18758604	chr7	71150506	71150556	LOC106991288	Exon (XR_001434951.1/LOC106991288, exon 3 of 3)
4427	V4427	0.521897666	12.00524352	1.49E-31	4.19E-31	0.688332247	432	cg01359455	chr23	3410299	3410349	ZADH2	Distal Intergenic
1362	V1362	0.521880175	12.00474505	1.50E-31	4.21E-31	0.672560294	432	cg13526892	chr17	54781901	54781951	ATXN2	Exon (XM_012097799.2/ATXN2, exon 9 of 23)
6396	V6396	0.521821105	12.00306172	1.53E-31	4.28E-31	0.663620914	432	cg02880697	chrX	22085926	22085976	POLA1	Intron (XM_012106423.2/POLA1, intron 33 of 36)
7702	V7702	0.521774514	12.00173413	1.55E-31	4.33E-31	0.677018344	432	cg03927039	chr3	10092661	10092711	PBX3	Intron (XM_012162805.2/PBX3, intron 4 of 10)
32235	V32235	0.521764962	12.00146196	1.56E-31	4.34E-31	0.676075519	432	cg23414911	chr1	97524159	97524209	LOC105612134	Distal Intergenic
34386	V34386	0.521689493	11.9993117	1.59E-31	4.44E-31	0.665983797	432	cg25199827	chr9	72993604	72993654	RIMS2	Exon (XM_015097882.1/RIMS2, exon 4 of 11)
17169	V17169	0.521661708	11.9985201	1.61E-31	4.47E-31	0.682512338	432	cg11472764	chr3	64908793	64908843	LOC105612568	Intron (XR_001434300.1/LOC105612568, intron 3 of 4)
33871	V33871	0.521620463	11.9973451	1.63E-31	4.53E-31	0.684235031	432	cg24779309	chr3	79344039	79344089	CAMKMT	Intron (XM_004007290.3/CAMKMT, intron 9 of 11)
6514	V6514	0.521517118	11.99440128	1.68E-31	4.67E-31	0.677646894	432	cg02974259	chr14	38548527	38548577	AP1G1	Exon (XM_012190073.2/AP1G1, exon 17 of 20)
10436	V10436	0.521495312	11.99378018	1.69E-31	4.69E-31	0.671116957	432	cg06121356	chrX	110428434	110428484	DOCK11	Intron (XM_015104746.1/DOCK11, intron 29 of 52)
2375	V2375	0.521403611	11.99116848	1.74E-31	4.82E-31	0.667147779	432	cg24186450	chr7	48349025	48349075	SLTM	Exon (XM_015097006.1/SLTM, exon 16 of 22)
11497	V11497	0.521395513	11.99093787	1.75E-31	4.83E-31	0.670744483	432	cg06916066	chr1	39632624	39632674	CACHD1	Intron (XM_012167056.2/CACHD1, intron 4 of 27)
143	V143	0.521337645	11.98928995	1.78E-31	4.90E-31	0.665425086	432	cg01609034	chrX	113674917	113674967	LOC101108550	Exon (XM_015105081.1/LOC101108550, exon 3 of 3)
3594	V3594	0.521331824	11.98912419	1.78E-31	4.90E-31	0.6734682	432	cg00703619	chr1	244520628	244520678	XRN1	Exon (XM_004003873.3/XRN1, exon 27 of 43)
19300	V19300	0.521318135	11.98873438	1.79E-31	4.92E-31	0.672979328	432	cg13190395	chr10	47341273	47341323	DACH1	Distal Intergenic
31341	V31341	0.521288341	11.98788602	1.81E-31	4.96E-31	0.689682466	432	cg22701330	chr9	90889305	90889355	LOC105616100	Distal Intergenic
10807	V10807	0.52124866	11.98675616	1.83E-31	5.01E-31	0.699483192	432	cg06426449	chr23	46248683	46248733	RNF165	Distal Intergenic
9835	V9835	0.52124022	11.98651586	1.83E-31	5.02E-31	0.702125431	432	cg05634634	chr2	135753763	135753813	RAPGEF4	Exon (XM_012133702.2/RAPGEF4, exon 26 of 26)
14778	V14778	0.521221316	11.98597764	1.84E-31	5.05E-31	0.672397337	432	cg09551110	chr4	32089781	32089831	TRA2A	Intron (NM_001130937.1/TRA2A, intron 1 of 7)
10819	V10819	0.521215827	11.98582134	1.85E-31	5.05E-31	0.675959121	432	cg06433155	chr1	120559067	120559117	LOC105609265	Distal Intergenic
31599	V31599	0.5211819	11.98485544	1.87E-31	5.09E-31	0.676901946	432	cg22909904	chr1	24348908	24348958	ELAVL4	Promoter (<=1kb)
3800	V3800	0.521141849	11.98371523	1.89E-31	5.15E-31	0.690427414	432	cg00858997	chr1	245866412	245866462	SLC25A36	Intron (XM_015092641.1/SLC25A36, intron 4 of 6)
684	V684	0.521107979	11.98275103	1.91E-31	5.20E-31	0.680894404	432	cg06675828	chr2	71110087	71110137	RFX3	Exon (XM_012124125.1/RFX3, exon 6 of 18)
19287	V19287	0.5210449	11.98095546	1.95E-31	5.30E-31	0.688052891	432	cg13178126	chrX	82636996	82637046	FMR1	Intron (XM_004022288.2/FMR1, intron 14 of 16)
26394	V26394	0.520966951	11.97873683	1.99E-31	5.42E-31	0.687855014	432	cg18775232	chr2	225625767	225625817	CUL3	Exon (XM_012147164.2/CUL3, exon 16 of 16)
16740	V16740	0.520966852	11.97873404	1.99E-31	5.42E-31	0.668544557	432	cg11132800	chr2	197428068	197428118	HECW2	Exon (XM_012141142.1/HECW2, exon 21 of 23)
11216	V11216	0.52095618	11.9784303	2.00E-31	5.43E-31	0.685340814	432	cg06716213	chr18	41990810	41990860	AKAP6	Intron (XM_004017884.2/AKAP6, intron 10 of 13)
11693	V11693	0.520867323	11.97590154	2.06E-31	5.57E-31	0.676797188	432	cg07054902	chrX	28470277	28470327	DMD	Exon (XM_004021989.3/DMD, exon 10 of 17)
1148	V1148	0.520857817	11.97563104	2.06E-31	5.59E-31	0.703848124	432	cg11390627	chr22	21657438	21657488	FGF8	Promoter (<=1kb)
5028	V5028	0.520812002	11.97432734	2.09E-31	5.66E-31	0.674993016	432	cg01823375	chr1	248754289	248754339	ARMC8	Exon (XM_015092647.1/ARMC8, exon 14 of 22)
28249	V28249	0.520764641	11.97297975	2.12E-31	5.74E-31	0.692231586	432	cg20211977	chr3	10438354	10438404	MAPKAP1	Intron (XM_012159507.2/MAPKAP1, intron 8 of 12)
32749	V32749	0.520654604	11.96984916	2.20E-31	5.92E-31	0.68812273	432	cg23821525	chr11	38278892	38278942	KPNB1	3' UTR
28384	V28384	0.520633541	11.96924997	2.21E-31	5.94E-31	0.689635907	432	cg20318511	chr23	30992658	30992708	SS18	Intron (XM_012103456.2/SS18, intron 7 of 10)
11769	V11769	0.520602348	11.96836263	2.23E-31	5.99E-31	0.673072446	432	cg07120809	chr15	41352575	41352625	EIF4G2	Exon (XM_012096549.1/EIF4G2, exon 11 of 23)
10921	V10921	0.520582505	11.96779817	2.25E-31	6.02E-31	0.689729025	432	cg06501452	chr23	20388539	20388589	KIAA1328	Intron (XM_015103593.1/KIAA1328, intron 2 of 7)
10609	V10609	0.52054997	11.96687272	2.27E-31	6.07E-31	0.708154856	432	cg06257833
8097	V8097	0.520462575	11.96438702	2.33E-31	6.23E-31	0.685794767	432	cg04257237	chr14	37594182	37594232	ZFHX3	Intron (XM_015100188.1/ZFHX3, intron 8 of 14)
33256	V33256	0.520430754	11.96348203	2.35E-31	6.29E-31	0.669347705	432	cg24264009	chr2	164454089	164454139	ZEB2	Intron (XM_012138277.2/ZEB2, intron 4 of 14)
18256	V18256	0.520335772	11.96078102	2.42E-31	6.46E-31	0.676424714	432	cg12371281	chr16	14228603	14228653	ADAMTS6	Intron (XM_015101273.1/ADAMTS6, intron 12 of 24)
928	V928	0.520168118	11.95601429	2.55E-31	6.78E-31	0.686353478	432	cg09057086	chr18	10702853	10702903	LOC105603050	Distal Intergenic
31543	V31543	0.520146584	11.95540212	2.57E-31	6.82E-31	0.683525002	432	cg22864641	chr18	60319593	60319643	VRK1	Intron (XM_015102041.1/VRK1, intron 11 of 12)
28712	V28712	0.520137964	11.95515707	2.58E-31	6.83E-31	0.677495577	432	cg20584529	chr10	46767547	46767597	DACH1	Intron (XM_012184753.2/DACH1, intron 1 of 11)
17953	V17953	0.520105203	11.9542258	2.60E-31	6.90E-31	0.69325589	432	cg12132605	chr23	3519265	3519315	ZNF407	Intron (XM_015103570.1/ZNF407, intron 8 of 9)
19747	V19747	0.520024907	11.95194345	2.67E-31	7.05E-31	0.685224416	432	cg13524924	chr6	42647449	42647499	LOC101103396	Distal Intergenic
24264	V24264	0.520008254	11.95147012	2.68E-31	7.08E-31	0.677041624	432	cg17054542	chr15	36796024	36796074	LOC105602234	Distal Intergenic
19781	V19781	0.519979905	11.95066441	2.71E-31	7.13E-31	0.689181954	432	cg13550531	chr18	43947782	43947832	CFL2	Exon (XM_015102004.1/CFL2, exon 2 of 4)
12552	V12552	0.519899546	11.94838067	2.77E-31	7.30E-31	0.68683071	432	cg07776022	chr23	31708228	31708278	ZNF521	Intron (XM_015103618.1/ZNF521, intron 2 of 5)
32140	V32140	0.519695941	11.94259554	2.95E-31	7.74E-31	0.693919359	432	cg23342110	chr2	136732221	136732271	HAT1	Exon (XM_004004594.2/HAT1, exon 4 of 11)
34729	V34729	0.519694381	11.94255122	2.95E-31	7.74E-31	0.681546233	432	cg25480877	chr22	21396688	21396738	BTRC	Intron (XM_004020119.3/BTRC, intron 4 of 14)
18907	V18907	0.519338693	11.93244893	3.30E-31	8.61E-31	0.681231958	432	cg12900732	chr2	230974323	230974373	TRIP12	Exon (XM_012147961.2/TRIP12, exon 2 of 40)
28020	V28020	0.519330245	11.93220906	3.30E-31	8.62E-31	0.67665751	432	cg20038100	chr16	14189899	14189949	ADAMTS6	Intron (XM_015101273.1/ADAMTS6, intron 10 of 24)
36641	V36641	0.519239365	11.92962872	3.40E-31	8.86E-31	0.680230934	432	cg26995613	chr3	125684674	125684724	ATP2B1	3' UTR
33042	V33042	0.519225133	11.92922468	3.41E-31	8.89E-31	0.699692709	432	cg24077904	chr1	227149255	227149305	RSRC1	Intron (XM_012100645.2/RSRC1, intron 5 of 9)
13951	V13951	0.519138595	11.92676798	3.51E-31	9.10E-31	0.67857808	432	cg08902786	chr2	198659124	198659174	SF3B1	5' UTR
23246	V23246	0.519040673	11.92398849	3.61E-31	9.37E-31	0.697027191	432	cg16253950	chr3	10297402	10297452	MAPKAP1	Exon (XM_012159507.2/MAPKAP1, exon 4 of 13)
5483	V5483	0.519026403	11.92358345	3.63E-31	9.40E-31	0.680370612	432	cg02165309
19101	V19101	0.518999259	11.92281308	3.66E-31	9.47E-31	0.672967688	432	cg13040099	chr3	11867582	11867632	DENND1A	Intron (XM_012163262.2/DENND1A, intron 1 of 20)
17701	V17701	0.518913165	11.92036976	3.76E-31	9.72E-31	0.695071701	432	cg11924156	chrX	109035686	109035736	NKRF	5' UTR
3691	V3691	0.518857562	11.91879194	3.82E-31	9.87E-31	0.704860788	432	cg00777947	chr8	63634761	63634811	REPS1	Exon (XM_004011378.3/REPS1, exon 10 of 20)
14687	V14687	0.518838257	11.91824415	3.84E-31	9.92E-31	0.678205606	432	cg09472391	chr11	20198106	20198156	NUFIP2	3' UTR
7740	V7740	0.518785012	11.9167334	3.91E-31	1.01E-30	0.685108018	432	cg03956142	chr1	226934089	226934139	RSRC1	Intron (XM_012100645.2/RSRC1, intron 7 of 9)
18203	V18203	0.518759961	11.91602266	3.94E-31	1.01E-30	0.683606481	432	cg12320940	chr15	26576886	26576936	LOC105602189	Distal Intergenic
30818	V30818	0.518683102	11.91384216	4.03E-31	1.04E-30	0.696596517	432	cg22263440	chr23	3544624	3544674	ZNF407	Intron (XM_015103570.1/ZNF407, intron 8 of 9)
16157	V16157	0.518655586	11.9130616	4.07E-31	1.04E-30	0.699378434	432	cg10654522	chr6	69544379	69544429	GSX2	Distal Intergenic
33887	V33887	0.518642259	11.91268354	4.08E-31	1.05E-30	0.681930347	432	cg24796250	chr22	32550412	32550462	TCF7L2	Intron (XM_015103420.1/TCF7L2, intron 7 of 14)
13993	V13993	0.518620303	11.91206072	4.11E-31	1.05E-30	0.676517832	432	cg08935709	chr16	3105992	3106042	RANBP17	Intron (XM_012096710.1/RANBP17, intron 19 of 27)
31133	V31133	0.518599685	11.91147589	4.14E-31	1.06E-30	0.675668126	432	cg22523137	chr14	41970261	41970311	ZNF507	Distal Intergenic
29470	V29470	0.518575687	11.9107952	4.17E-31	1.06E-30	0.683303846	432	cg21193029	chr2	130661320	130661370	OSBPL6	Intron (XM_012132743.2/OSBPL6, intron 9 of 24)
240	V240	0.518556238	11.91024356	4.19E-31	1.07E-30	0.678042648	432	cg02443198	chr12	60016843	60016893	XPR1	3' UTR
21728	V21728	0.518553478	11.91016527	4.20E-31	1.07E-30	0.676587671	432	cg15047244	chr23	31828593	31828643	ZNF521	Intron (XM_015103618.1/ZNF521, intron 4 of 5)
4609	V4609	0.518514563	11.90906154	4.25E-31	1.08E-30	0.707770742	432	cg01500797	chr1	193098030	193098080	FGF12	Distal Intergenic
4066	V4066	0.518402178	11.90587438	4.39E-31	1.12E-30	0.690543812	432	cg01068369	chr3	94775436	94775486	SFXN5	Intron (XM_004006070.3/SFXN5, intron 10 of 13)
22912	V22912	0.518329246	11.90380632	4.49E-31	1.14E-30	0.694291834	432	cg15982050	chr11	37766016	37766066	SKAP1	Intron (XM_015098342.1/SKAP1, intron 5 of 13)
14993	V14993	0.51820552	11.90029847	4.67E-31	1.18E-30	0.694140516	432	cg09689442	chr7	9088416	9088466	AP3B1	Intron (XM_012180683.2/AP3B1, intron 7 of 26)
1355	V1355	0.51819644	11.90004106	4.68E-31	1.18E-30	0.67732098	432	cg13411623	chr18	32923844	32923894	CLK3	Exon (XM_015101988.1/CLK3, exon 3 of 12)
23101	V23101	0.518180913	11.8996009	4.70E-31	1.19E-30	0.686632834	432	cg16126692	chr14	25710857	25710907	CNOT1	Exon (XM_004015040.2/CNOT1, exon 2 of 49)
23777	V23777	0.518146029	11.89861202	4.75E-31	1.20E-30	0.690194618	432	cg16687257	chr1	255025875	255025925	DNAJC13	Exon (XM_004003339.3/DNAJC13, exon 55 of 56)
17274	V17274	0.518138058	11.89838608	4.77E-31	1.20E-30	0.678310364	432	cg11567215	chr16	5709912	5709962	CPEB4	Exon (XM_004016878.3/CPEB4, exon 9 of 9)
23870	V23870	0.51804491	11.89574581	4.90E-31	1.23E-30	0.693034733	432	cg16746511	chr2	152180691	152180741	NR4A2	Exon (XM_004004686.2/NR4A2, exon 3 of 8)
37032	V37032	0.518022977	11.89512418	4.94E-31	1.24E-30	0.673805755	432	cg27311171	chr1	95450176	95450226	TBX15	Intron (XM_004002385.3/TBX15, intron 6 of 7)
20530	V20530	0.517986483	11.89408991	4.99E-31	1.25E-30	0.70533802	432	cg14155483	chr3	132179885	132179935	HOXC6	Promoter (<=1kb)
20069	V20069	0.517979608	11.89389507	5.00E-31	1.25E-30	0.685724928	432	cg13780795	chr20	7690826	7690876	SYNGAP1	Exon (XM_015102659.1/SYNGAP1, exon 19 of 20)
12846	V12846	0.517927888	11.89242935	5.08E-31	1.27E-30	0.683536642	432	cg08013737	chr11	13024645	13024695	ACACA	Intron (NM_001009256.1/ACACA, intron 48 of 57)
10433	V10433	0.517846409	11.89012052	5.21E-31	1.30E-30	0.678147407	432	cg06116526	chrX	118045946	118045996	AMMECR1	3' UTR
35569	V35569	0.517811847	11.88914125	5.27E-31	1.31E-30	0.671314834	432	cg26127955	chr5	67730790	67730840	EBF1	Intron (XM_012178873.2/EBF1, intron 6 of 15)
22821	V22821	0.517588976	11.88282753	5.64E-31	1.40E-30	0.666786945	432	cg15911114	chr16	25626479	25626529	FST	3' UTR
21706	V21706	0.517576392	11.8824711	5.66E-31	1.41E-30	0.673666077	432	cg15033935	chr25	31437299	31437349	C25H10orf11	Intron (XM_012105395.2/C25H10orf11, intron 2 of 5)
18784	V18784	0.517543773	11.88154722	5.72E-31	1.42E-30	0.689822144	432	cg12808825	chr2	86673051	86673101	ADAMTSL1	Intron (XM_012126599.2/ADAMTSL1, intron 10 of 29)
13727	V13727	0.517541617	11.88148617	5.72E-31	1.42E-30	0.692545861	432	cg08722395	chr2	165036677	165036727	LOC101123186	Distal Intergenic
30354	V30354	0.517469307	11.87943826	5.85E-31	1.45E-30	0.677984449	432	cg21863869	chr18	13230258	13230308	CHD2	Exon (XM_012098403.2/CHD2, exon 24 of 42)
21102	V21102	0.517428817	11.87829162	5.92E-31	1.46E-30	0.669510662	432	cg14576603	chr25	32241837	32241887	LOC106991576	Intron (XR_001436738.1/LOC106991576, intron 1 of 1)
21797	V21797	0.517408617	11.87771959	5.96E-31	1.47E-30	0.659290902	432	cg15099808	chr17	7342868	7342918	LRBA	Intron (XM_015101368.1/LRBA, intron 53 of 56)
19869	V19869	0.517374087	11.87674182	6.02E-31	1.48E-30	0.680324053	432	cg13627994	chr1	270553336	270553386	ANKRD28	Exon (XM_015092715.1/ANKRD28, exon 25 of 27)
8706	V8706	0.517058006	11.8677937	6.63E-31	1.63E-30	0.685724928	432	cg04722310	chr11	20390620	20390670	TAOK1	Exon (XM_004012516.3/TAOK1, exon 20 of 20)
10901	V10901	0.517005799	11.86631611	6.74E-31	1.65E-30	0.67219946	432	cg06490492	chrX	92488639	92488689	ZIC3	Distal Intergenic
28392	V28392	0.516961954	11.86507528	6.83E-31	1.67E-30	0.701054567	432	cg20321177	chr3	12033197	12033247	DENND1A	Intron (XM_012163262.2/DENND1A, intron 9 of 20)
9554	V9554	0.516924546	11.8640167	6.91E-31	1.69E-30	0.67412003	432	cg05401971	chr21	44354637	44354687	KDM2A	Exon (XM_012102174.2/KDM2A, exon 18 of 22)
27566	V27566	0.516902262	11.86338611	6.95E-31	1.70E-30	0.687168265	432	cg19691194	chr2	135156512	135156562	SP3	Distal Intergenic
20841	V20841	0.516881225	11.86279082	7.00E-31	1.71E-30	0.675132694	432	cg14399520	chr7	29417011	29417061	C7H15orf41	Intron (XM_012181163.2/C7H15orf41, intron 8 of 8)
30164	V30164	0.516814948	11.86091552	7.14E-31	1.74E-30	0.697178508	432	cg21724411	chr7	8667411	8667461	TBCA	Intron (XM_015096795.1/TBCA, intron 1 of 3)
134	V134	0.516814235	11.86089537	7.14E-31	1.74E-30	0.678182326	432	cg01490044	chr1	18637761	18637811	ERI3	Intron (XM_012121196.2/ERI3, intron 7 of 7)
10968	V10968	0.516777284	11.85984991	7.22E-31	1.76E-30	0.672746531	432	cg06535652	chr4	85249627	85249677	KCND2	Exon (XM_015095112.1/KCND2, exon 7 of 7)
10651	V10651	0.516769491	11.85962943	7.24E-31	1.76E-30	0.67538877	432	cg06299803	chr19	14699120	14699170	NKTR	5' UTR
8652	V8652	0.516749022	11.85905033	7.29E-31	1.77E-30	0.677495577	432	cg04679564	chr8	50997735	50997785	SNX14	Exon (XM_012182827.2/SNX14, exon 18 of 25)
36897	V36897	0.516723952	11.85834109	7.34E-31	1.78E-30	0.736078778	432	cg27201382	chr15	56487330	56487380	BDNF	Promoter (<=1kb)
28278	V28278	0.516697799	11.85760124	7.40E-31	1.79E-30	0.684898501	432	cg20239387	chr3	37988915	37988965	TIA1	Exon (XM_012167463.2/TIA1, exon 8 of 13)
24756	V24756	0.516692431	11.85744937	7.41E-31	1.79E-30	0.721598845	432	cg17438987	chr3	132549124	132549174	ATP5G2	Promoter (1-2kb)
11798	V11798	0.516655944	11.85641723	7.50E-31	1.81E-30	0.697143589	432	cg07145999	chr7	66553450	66553500	AP5M1	3' UTR
33999	V33999	0.516616568	11.85530342	7.59E-31	1.83E-30	0.67471366	432	cg24882108	chr3	66010974	66011024	LOC101111446	Distal Intergenic
23115	V23115	0.516460961	11.85090246	7.96E-31	1.91E-30	0.669743458	432	cg16143691	chr11	38360390	38360440	NPEPPS	Exon (XM_012185997.2/NPEPPS, exon 9 of 23)
1075	V1075	0.51644244	11.85037871	8.00E-31	1.92E-30	0.675027936	432	cg10742112	chr1	272670602	272670652	TBC1D5	Distal Intergenic
5310	V5310	0.516289758	11.84606152	8.38E-31	2.01E-30	0.679928299	432	cg02042680	chr2	47585139	47585189	STX17	Exon (XM_015093125.1/STX17, exon 8 of 8)
8708	V8708	0.516283714	11.84589062	8.40E-31	2.01E-30	0.677123103	432	cg04724018	chrX	102248216	102248266	STAG2	3' UTR
13493	V13493	0.516208589	11.84376677	8.59E-31	2.05E-30	0.700973089	432	cg08560335	chr1	63621072	63621122	LOC105609234	Distal Intergenic
25591	V25591	0.516194535	11.84336948	8.63E-31	2.06E-30	0.68816929	432	cg18133238	chr1	37814349	37814399	ATG4C	Distal Intergenic
23232	V23232	0.516174921	11.84281503	8.68E-31	2.07E-30	0.685527051	432	cg16238914	chr6	14527072	14527122	PITX2	Distal Intergenic
1345	V1345	0.515996328	11.83776717	9.17E-31	2.18E-30	0.675749604	432	cg13341941	chr6	83988603	83988653	YTHDC1	Intron (XM_012180082.2/YTHDC1, intron 11 of 16)
33031	V33031	0.515995949	11.83775646	9.17E-31	2.18E-30	0.691032685	432	cg24065099	chr1	121912013	121912063	SCAF4	Exon (XM_015092376.1/SCAF4, exon 19 of 20)
35659	V35659	0.515986377	11.83748595	9.19E-31	2.18E-30	0.678450042	432	cg26195623	chr2	65573834	65573884	TRPM3	Exon (XM_012123226.2/TRPM3, exon 14 of 27)
172	V172	0.515914465	11.83545378	9.40E-31	2.23E-30	0.676494553	432	cg01857866	chr18	32923776	32923826	CLK3	Intron (XM_015101988.1/CLK3, intron 3 of 11)
37248	V37248	0.515886785	11.83467163	9.48E-31	2.25E-30	0.672665053	432	cg27491520	chr11	62042774	62042824	HELZ	Exon (XM_004013156.2/HELZ, exon 9 of 34)
18976	V18976	0.515873662	11.83430082	9.51E-31	2.25E-30	0.686923829	432	cg12945499	chr4	53769203	53769253	FOXP2	Exon (XM_012176772.1/FOXP2, exon 14 of 18)
22364	V22364	0.515825076	11.832928	9.66E-31	2.28E-30	0.678903995	432	cg15552122	chr11	13019078	13019128	ACACA	Intron (NM_001009256.1/ACACA, intron 50 of 57)
31897	V31897	0.51581818	11.83273317	9.68E-31	2.29E-30	0.687913214	432	cg23141081	chr15	34890884	34890934	PIK3C2A	Exon (XM_004016121.3/PIK3C2A, exon 25 of 33)
19607	V19607	0.515812136	11.83256241	9.69E-31	2.29E-30	0.675470249	432	cg13420767	chr8	37431390	37431440	PNISR	Exon (XM_004011253.2/PNISR, exon 12 of 12)
28841	V28841	0.515777815	11.83159275	9.80E-31	2.31E-30	0.697271627	432	cg20678942	chr25	30699932	30699982	SAMD8	Exon (XM_015104461.1/SAMD8, exon 5 of 7)
36904	V36904	0.515764879	11.83122726	9.83E-31	2.32E-30	0.712624546	432	cg27205180
9097	V9097	0.515734692	11.83037444	9.92E-31	2.33E-30	0.681325077	432	cg05067709	chr25	31117911	31117961	C25H10orf11	Intron (XM_012105395.2/C25H10orf11, intron 2 of 5)
13725	V13725	0.5157241	11.83007521	9.96E-31	2.34E-30	0.676180277	432	cg08722258	chr22	6754655	6754705	PRKG1	Exon (XM_012102466.2/PRKG1, exon 4 of 12)
29428	V29428	0.515722283	11.83002387	9.96E-31	2.34E-30	0.672397337	432	cg21163974	chr15	35920139	35920189	SOX6	Intron (XM_015100742.1/SOX6, intron 12 of 18)
18918	V18918	0.515649159	11.82795823	1.02E-30	2.39E-30	0.688425365	432	cg12907232	chrX	38297052	38297102	USP9X	5' UTR
7826	V7826	0.51551734	11.82423506	1.06E-30	2.48E-30	0.684165192	432	cg04037485	chr7	8915949	8915999	LOC105615610	Intron (XR_001434882.1/LOC105615610, intron 1 of 2)
1613	V1613	0.515512734	11.82410499	1.06E-30	2.48E-30	0.721820002	432	cg16264705	chr3	132549204	132549254	ATP5G2	Promoter (1-2kb)
19074	V19074	0.515498942	11.82371547	1.07E-30	2.49E-30	0.701438681	432	cg13020851	chr18	42183897	42183947	NPAS3	Distal Intergenic
31710	V31710	0.515357177	11.81971225	1.11E-30	2.59E-30	0.725160629	432	cg23004138	chr3	132549040	132549090	ATP5G2	Promoter (1-2kb)
37093	V37093	0.515354313	11.81963138	1.11E-30	2.59E-30	0.695234659	432	cg27362456	chr16	69324358	69324408	LOC105602651	Distal Intergenic
16823	V16823	0.515343158	11.81931642	1.12E-30	2.60E-30	0.688402086	432	cg11195606	chr2	47694620	47694670	NR4A3	3' UTR
22356	V22356	0.515246677	11.81659245	1.15E-30	2.68E-30	0.686097402	432	cg15544311	chrX	22165654	22165704	POLA1	Intron (XM_012106423.2/POLA1, intron 35 of 36)
19222	V19222	0.515221213	11.8158736	1.16E-30	2.69E-30	0.697155229	432	cg13132708	chr7	20014461	20014511	NPTN	Exon (XM_004010288.3/NPTN, exon 2 of 9)
22724	V22724	0.515218802	11.81580552	1.16E-30	2.69E-30	0.669510662	432	cg15832538	chr7	82443591	82443641	VSX2	Distal Intergenic
32996	V32996	0.515176046	11.81459855	1.18E-30	2.72E-30	0.685759847	432	cg24035747	chr1	205775640	205775690	MFN1	Exon (XM_012098611.2/MFN1, exon 7 of 15)
19816	V19816	0.515147847	11.81380254	1.19E-30	2.75E-30	0.689333271	432	cg13588911	chr18	46328305	46328355	MIPOL1	Intron (XM_015101770.1/MIPOL1, intron 2 of 13)
15262	V15262	0.514999442	11.80961391	1.24E-30	2.87E-30	0.717629668	432	cg09915899	chr2	83695973	83696023	CCDC171	Exon (XM_004004388.3/CCDC171, exon 22 of 26)
5581	V5581	0.514973563	11.80888358	1.25E-30	2.89E-30	0.672699972	432	cg02231695	chr5	90946773	90946823	KIAA0825	Intron (XM_012178948.1/KIAA0825, intron 21 of 21)
23458	V23458	0.514948053	11.8081637	1.26E-30	2.91E-30	0.683559922	432	cg16433982	chr3	42265628	42265678	LOC101117153	Distal Intergenic
10837	V10837	0.514937109	11.80785486	1.26E-30	2.91E-30	0.681394916	432	cg06448663	chr2	197428074	197428124	HECW2	Exon (XM_012141142.1/HECW2, exon 21 of 23)
36756	V36756	0.514930161	11.8076588	1.27E-30	2.92E-30	0.672234379	432	cg27089055	chr2	133873790	133873840	ATF2	Exon (XM_004004570.3/ATF2, exon 5 of 15)
4992	V4992	0.514926546	11.80755677	1.27E-30	2.92E-30	0.678368563	432	cg01796610	chr14	7643270	7643320	CMIP	Exon (XM_015100145.1/CMIP, exon 24 of 27)
14748	V14748	0.514910491	11.80710374	1.27E-30	2.93E-30	0.681918708	432	cg09530596	chr2	240470695	240470745	TMEM57	5' UTR
12722	V12722	0.514906986	11.80700483	1.28E-30	2.93E-30	0.672571934	432	cg07909547	chr10	84627634	84627684	ANKRD10	Intron (XM_015098017.1/ANKRD10, intron 3 of 8)
20100	V20100	0.514893296	11.80661853	1.28E-30	2.94E-30	0.698423969	432	cg13815701	chr2	159722210	159722260	EPC2	Exon (XM_004004712.2/EPC2, exon 3 of 15)
36872	V36872	0.514794595	11.80383366	1.32E-30	3.02E-30	0.683443524	432	cg27180150	chr15	60308808	60308858	DNAJC24	Intron (XM_012096147.2/DNAJC24, intron 3 of 3)
14750	V14750	0.514785091	11.80356551	1.32E-30	3.02E-30	0.678228885	432	cg09531328	chr1	63756340	63756390	LMO4	Intron (XM_004002167.3/LMO4, intron 2 of 4)
22666	V22666	0.514752709	11.80265194	1.34E-30	3.05E-30	0.665599683	432	cg15785094	chr3	40584339	40584389	ETAA1	Distal Intergenic
10738	V10738	0.514737266	11.80221627	1.34E-30	3.06E-30	0.675109414	432	cg06369774	chr12	19087599	19087649	GPATCH2	Intron (XM_004013599.3/GPATCH2, intron 5 of 9)
15035	V15035	0.51463423	11.79930974	1.39E-30	3.15E-30	0.69835413	432	cg09718446	chr2	84721780	84721830	BNC2	5' UTR
32798	V32798	0.514575122	11.79764255	1.41E-30	3.21E-30	0.696096005	432	cg23852530	chr7	76023504	76023554	MPP5	5' UTR
25459	V25459	0.514567674	11.79743247	1.41E-30	3.21E-30	0.67030217	432	cg18014986	chr19	30110011	30110061	FOXP1	Intron (XM_015102109.1/FOXP1, intron 2 of 17)
32826	V32826	0.514545217	11.7967991	1.42E-30	3.23E-30	0.672606854	432	cg23873921	chr1	69453501	69453551	MTF2	3' UTR
22367	V22367	0.51452831	11.79632225	1.43E-30	3.25E-30	0.661048515	432	cg15557003	chr1	45459211	45459261	LRRC7	3' UTR
2803	V2803	0.514506516	11.79570762	1.44E-30	3.27E-30	0.685445572	432	cg00060633	chr11	20351105	20351155	TAOK1	Exon (XM_004012516.3/TAOK1, exon 4 of 20)
34471	V34471	0.514503102	11.79561133	1.44E-30	3.27E-30	0.683396964	432	cg25278470	chr4	28460089	28460139	TMEM196	Exon (XM_015095215.1/TMEM196, exon 6 of 7)
29173	V29173	0.514481752	11.79500923	1.45E-30	3.28E-30	0.680172735	432	cg20959809	chr10	52743019	52743069	MYCBP2	Intron (XM_015097992.1/MYCBP2, intron 20 of 87)
17252	V17252	0.514459626	11.79438529	1.46E-30	3.30E-30	0.701636558	432	cg11548411	chr22	21208785	21208835	LOC105604254	Promoter (1-2kb)
36751	V36751	0.514425801	11.79343144	1.48E-30	3.33E-30	0.674632182	432	cg27086064	chr2	129865753	129865803	SESTD1	Intron (XM_015093334.1/SESTD1, intron 11 of 17)
7888	V7888	0.514412198	11.79304784	1.48E-30	3.35E-30	0.667625012	432	cg04086827	chr10	32041237	32041287	PAN3	Exon (XM_012184657.1/PAN3, exon 15 of 19)
27613	V27613	0.514320111	11.79045133	1.52E-30	3.43E-30	0.668672595	432	cg19718147	chr13	13098059	13098109	TRNAG-UCC	Promoter (3-4kb)
3449	V3449	0.514287936	11.78954417	1.54E-30	3.47E-30	0.690543812	432	cg00580454	chr5	12786254	12786304	ILF3	Intron (XM_015095830.1/ILF3, intron 18 of 20)
14396	V14396	0.514258828	11.78872354	1.55E-30	3.49E-30	0.689973461	432	cg09248411	chr19	30775228	30775278	FOXP1	Distal Intergenic
12922	V12922	0.514242881	11.78827396	1.56E-30	3.50E-30	0.694000838	432	cg08079261	chr1	227149305	227149355	RSRC1	Intron (XM_012100645.2/RSRC1, intron 5 of 9)
32847	V32847	0.514229482	11.78789624	1.57E-30	3.52E-30	0.684246671	432	cg23899468	chr8	29573928	29573978	SOBP	Intron (XM_015097362.1/SOBP, intron 4 of 9)
9735	V9735	0.514209301	11.78732732	1.58E-30	3.53E-30	0.669289506	432	cg05553771	chr2	70515387	70515437	VLDLR	Exon (XM_012123965.2/VLDLR, exon 9 of 16)
5311	V5311	0.514085154	11.78382788	1.64E-30	3.67E-30	0.702730701	432	cg02043372	chr1	64672695	64672745	LOC101113557	Distal Intergenic
37088	V37088	0.514080204	11.78368835	1.64E-30	3.67E-30	0.667927647	432	cg27361367	chr11	11094558	11094608	TRNAC-ACA	Distal Intergenic
12532	V12532	0.514046608	11.78274146	1.66E-30	3.70E-30	0.681406556	432	cg07759056	chr17	5057806	5057856	FBXW7	5' UTR
31040	V31040	0.514042113	11.78261478	1.66E-30	3.70E-30	0.691661235	432	cg22449113	chr15	53929914	53929964	EMSY	Intron (XM_004016336.3/EMSY, intron 5 of 20)
1334	V1334	0.51404131	11.78259215	1.66E-30	3.70E-30	0.710901853	432	cg13169490	chr18	38060563	38060613	FOXG1	Promoter (3-4kb)
26531	V26531	0.514005149	11.78157304	1.68E-30	3.74E-30	0.685899525	432	cg18884468	chr1	224875220	224875270	KPNA4	3' UTR
3514	V3514	0.513974326	11.78070438	1.69E-30	3.77E-30	0.683978955	432	cg00631268	chr12	67622055	67622105	PROX1	Intron (XM_015099370.1/PROX1, intron 3 of 4)
33621	V33621	0.513965752	11.78046276	1.70E-30	3.78E-30	0.676471273	432	cg24551262	chr1	18659609	18659659	ERI3	Intron (XM_012121196.2/ERI3, intron 6 of 7)
30754	V30754	0.51396059	11.7803173	1.70E-30	3.78E-30	0.672583574	432	cg22209761	chrX	60792253	60792303	OGT	Intron (XM_004022177.3/OGT, intron 4 of 21)
14538	V14538	0.513899864	11.77860609	1.73E-30	3.85E-30	0.714207561	432	cg09363187	chr7	73551356	73551406	HSPA2	Exon (XM_004010719.3/HSPA2, exon 1 of 1)
5280	V5280	0.513872737	11.77784171	1.75E-30	3.88E-30	0.691812552	432	cg02026974	chr8	26168724	26168774	REV3L	Intron (XM_012182594.2/REV3L, intron 24 of 31)
20269	V20269	0.513862803	11.77756182	1.75E-30	3.89E-30	0.652237173	432	cg13943045	chr10	5494490	5494540	PCDH17	Intron (XM_004012040.2/PCDH17, intron 2 of 4)
21891	V21891	0.513852162	11.77726197	1.76E-30	3.89E-30	0.678612999	432	cg15175780	chr3	131150820	131150870	VEZT	Intron (XM_004006262.3/VEZT, intron 11 of 11)
34357	V34357	0.513802192	11.77585407	1.78E-30	3.95E-30	0.686411677	432	cg25172570	chr15	49478343	49478393	NUP98	Exon (XM_015101064.1/NUP98, exon 10 of 33)
26614	V26614	0.513754587	11.77451287	1.81E-30	4.00E-30	0.68943803	432	cg18953741	chr22	32550376	32550426	TCF7L2	Intron (XM_015103420.1/TCF7L2, intron 7 of 14)
13279	V13279	0.513684967	11.7725516	1.85E-30	4.08E-30	0.681976907	432	cg08380206	chr3	10070485	10070535	PBX3	Intron (XM_012162805.2/PBX3, intron 4 of 10)
10536	V10536	0.513624819	11.77085733	1.88E-30	4.15E-30	0.696014526	432	cg06198114	chr3	10322925	10322975	MAPKAP1	Intron (XM_012159507.2/MAPKAP1, intron 5 of 12)
9193	V9193	0.513505864	11.76750698	1.95E-30	4.29E-30	0.668195363	432	cg05134560	chr17	72108713	72108763	DGCR8	Exon (XM_015101467.1/DGCR8, exon 1 of 14)
14891	V14891	0.513489962	11.76705913	1.96E-30	4.30E-30	0.687948133	432	cg09622673	chr22	21345431	21345481	BTRC	Intron (XM_004020119.3/BTRC, intron 2 of 14)
33699	V33699	0.51347019	11.76650233	1.97E-30	4.33E-30	0.684549306	432	cg24611541	chr16	37098083	37098133	NIPBL	3' UTR
29145	V29145	0.513425464	11.76524284	2.00E-30	4.38E-30	0.683618121	432	cg20938109
36305	V36305	0.513409288	11.76478734	2.01E-30	4.40E-30	0.692219946	432	cg26717676	chr10	69622542	69622592	LOC105616207	Distal Intergenic
26714	V26714	0.513360676	11.76341853	2.04E-30	4.46E-30	0.687412701	432	cg19040195
30427	V30427	0.51321758	11.75938979	2.13E-30	4.64E-30	0.679113512	432	cg21923252	chr3	214801134	214801184	CACNA1I	Intron (XM_015093996.1/CACNA1I, intron 8 of 41)
28003	V28003	0.51317529	11.7581993	2.15E-30	4.70E-30	0.693822677	432	cg20020695	chr12	31217981	31218031	ZBTB18	3' UTR
29617	V29617	0.513133537	11.75702402	2.18E-30	4.75E-30	0.68940311	432	cg21298229	chr10	69620534	69620584	LOC105616207	Distal Intergenic
35110	V35110	0.513095872	11.75596385	2.21E-30	4.80E-30	0.673968712	432	cg25762464	chrX	22117623	22117673	POLA1	Intron (XM_012106423.2/POLA1, intron 34 of 36)
23536	V23536	0.513088833	11.75576572	2.21E-30	4.81E-30	0.68302449	432	cg16491260	chr16	14189960	14190010	ADAMTS6	Intron (XM_015101273.1/ADAMTS6, intron 10 of 24)
14563	V14563	0.512972674	11.75249655	2.29E-30	4.97E-30	0.67728606	432	cg09382150	chr9	73056930	73056980	RIMS2	Exon (XM_015097873.1/RIMS2, exon 10 of 22)
22537	V22537	0.512960956	11.7521668	2.30E-30	4.98E-30	0.680638328	432	cg15689693	chr18	43625464	43625514	LOC105603181	Intron (XR_001436091.1/LOC105603181, intron 2 of 3)
23058	V23058	0.512917854	11.75095387	2.33E-30	5.04E-30	0.687773536	432	cg16102730	chr3	10324714	10324764	MAPKAP1	Intron (XM_012159507.2/MAPKAP1, intron 5 of 12)
12439	V12439	0.512901578	11.75049588	2.34E-30	5.06E-30	0.680347332	432	cg07682101	chr10	28841796	28841846	N4BP2L1	Exon (XM_004012135.3/N4BP2L1, exon 5 of 6)
7528	V7528	0.512900094	11.75045412	2.34E-30	5.06E-30	0.681197039	432	cg03799825	chr1	86678686	86678736	RBM15	3' UTR
21282	V21282	0.512835322	11.74863161	2.39E-30	5.16E-30	0.675097774	432	cg14713702	chr14	48539659	48539709	PSMC4	Exon (XM_004015250.3/PSMC4, exon 11 of 11)
6493	V6493	0.512814711	11.7480517	2.40E-30	5.18E-30	0.664458981	432	cg02961896	chr3	85693509	85693559	LOC101119456	Distal Intergenic
11911	V11911	0.512813917	11.74802936	2.40E-30	5.18E-30	0.682814973	432	cg07239853	chr1	64185994	64186044	LOC105609236	Distal Intergenic
29648	V29648	0.512769189	11.74677095	2.43E-30	5.25E-30	0.696049446	432	cg21317803	chr22	20723722	20723772	LOC105604251	Promoter (2-3kb)
3662	V3662	0.512745802	11.74611301	2.45E-30	5.28E-30	0.68240758	432	cg00753997	chr2	82170921	82170971	LOC101121753	Distal Intergenic
29632	V29632	0.512706871	11.74501779	2.48E-30	5.34E-30	0.682919732	432	cg21306693	chr3	214070511	214070561	GTPBP1	Intron (XM_015095029.1/GTPBP1, intron 4 of 15)
4841	V4841	0.512687636	11.74447668	2.49E-30	5.36E-30	0.682093305	432	cg01676370	chr14	17649431	17649481	LOC105616846	Exon (XR_001045006.2/LOC105616846, exon 3 of 3)
20835	V20835	0.512586917	11.74164362	2.57E-30	5.52E-30	0.676727349	432	cg14397160	chr24	30372776	30372826	LOC105604756	Distal Intergenic
5383	V5383	0.512500413	11.73921071	2.64E-30	5.66E-30	0.666717106	432	cg02093669	chr25	31537461	31537511	C25H10orf11	Intron (XM_012105395.2/C25H10orf11, intron 2 of 5)
11481	V11481	0.512421837	11.737001	2.70E-30	5.79E-30	0.69580501	432	cg06903829	chr7	49972025	49972075	TCF12	3' UTR
32075	V32075	0.512394892	11.73624332	2.72E-30	5.83E-30	0.699087438	432	cg23279931	chrX	22117635	22117685	POLA1	Intron (XM_012106423.2/POLA1, intron 34 of 36)
18464	V18464	0.512338792	11.73466591	2.77E-30	5.92E-30	0.677262781	432	cg12536527	chr4	38566407	38566457	CACNA2D1	Exon (XM_015095243.1/CACNA2D1, exon 16 of 40)
31060	V31060	0.512236649	11.73179417	2.86E-30	6.08E-30	0.659174504	432	cg22468573	chr4	44595947	44595997	SLC26A5	Exon (XM_015095256.1/SLC26A5, exon 6 of 18)
35287	V35287	0.512228404	11.73156239	2.86E-30	6.09E-30	0.673014247	432	cg25904692	chr7	44004581	44004631	TPM1	Exon (XM_015096682.1/TPM1, exon 8 of 9)
5036	V5036	0.51217639	11.73010019	2.91E-30	6.18E-30	0.689600987	432	cg01827691	chr13	77547078	77547128	UBE2V1	Promoter (<=1kb)
1762	V1762	0.512148993	11.72933006	2.93E-30	6.22E-30	0.700554055	432	cg17861230	chr5	4680097	4680147	LOC106991161	Exon (LOC106991161/LOC106991161, exon 3 of 3)
13837	V13837	0.512142953	11.72916029	2.94E-30	6.23E-30	0.679928299	432	cg08821418	chr1	25603763	25603813	EPS15	Intron (XM_015091969.1/EPS15, intron 11 of 24)
7095	V7095	0.512119724	11.72850735	2.96E-30	6.27E-30	0.694198715	432	cg03463065	chr5	90895639	90895689	KIAA0825	Intron (XM_012178948.1/KIAA0825, intron 21 of 21)
11990	V11990	0.512110735	11.72825469	2.97E-30	6.28E-30	0.68876292	432	cg07290414	chr20	18682493	18682543	RUNX2	Exon (XM_015102729.1/RUNX2, exon 5 of 11)
4739	V4739	0.512078448	11.72734719	3.00E-30	6.34E-30	0.69897104	432	cg01597530	chr7	14298080	14298130	MAP2K5	Intron (XM_012180834.2/MAP2K5, intron 14 of 17)
16165	V16165	0.512073489	11.72720779	3.00E-30	6.34E-30	0.68559689	432	cg10663134	chr12	41058686	41058736	PEX14	Intron (XM_004013728.3/PEX14, intron 3 of 8)
25891	V25891	0.512042348	11.72633254	3.03E-30	6.39E-30	0.685829686	432	cg18367074	chr2	134981245	134981295	SP3	Exon (XM_012133463.2/SP3, exon 4 of 4)
19552	V19552	0.512032438	11.72605403	3.04E-30	6.41E-30	0.696957352	432	cg13377646	chr18	5972197	5972247	MEF2A	3' UTR
20229	V20229	0.51202495	11.72584359	3.04E-30	6.42E-30	0.64347239	432	cg13912499	chr3	9541868	9541918	MVB12B	Intron (XM_015094187.1/MVB12B, intron 7 of 9)
36728	V36728	0.512005605	11.72529992	3.06E-30	6.45E-30	0.667659931	432	cg27069145	chr3	133063263	133063313	SPRYD3	Exon (XM_004006313.3/SPRYD3, exon 4 of 11)
35418	V35418	0.511919395	11.72287722	3.14E-30	6.61E-30	0.713602291	432	cg26014931	chr7	8893574	8893624	LOC105615610	Distal Intergenic
21333	V21333	0.511898434	11.72228822	3.16E-30	6.64E-30	0.684106993	432	cg14748407	chr22	17436035	17436085	LOC101112525	5' UTR
13115	V13115	0.511859213	11.72118616	3.20E-30	6.72E-30	0.707340069	432	cg08245710	chr23	56340859	56340909	WDR7	Intron (XM_015103784.1/WDR7, intron 20 of 25)
13770	V13770	0.511798563	11.71948207	3.26E-30	6.83E-30	0.676506192	432	cg08764023	chr8	61234679	61234729	BCLAF1	3' UTR
27223	V27223	0.511797608	11.71945523	3.26E-30	6.83E-30	0.706211007	432	cg19447278	chr2	137504966	137505016	TLK1	Intron (XM_015093364.1/TLK1, intron 3 of 20)
7727	V7727	0.511772509	11.71875007	3.28E-30	6.87E-30	0.696026166	432	cg03946394	chr5	66648922	66648972	CLINT1	Exon (XM_004009023.3/CLINT1, exon 3 of 11)
31892	V31892	0.511679179	11.71612814	3.38E-30	7.05E-30	0.680812925	432	cg23134220	chr1	201207379	201207429	ABCC5	5' UTR
25311	V25311	0.511640681	11.71504673	3.42E-30	7.12E-30	0.67668079	432	cg17890086	chr3	9158277	9158327	ZBTB43	Exon (XM_012162712.2/ZBTB43, exon 2 of 3)
839	V839	0.511585936	11.71350902	3.47E-30	7.24E-30	0.673596238	432	cg08167680	chr1	41879340	41879390	SGIP1	Intron (XM_015092023.1/SGIP1, intron 19 of 26)
6270	V6270	0.51157373	11.71316618	3.49E-30	7.26E-30	0.658126921	432	cg02770072
22355	V22355	0.511569127	11.71303691	3.49E-30	7.26E-30	0.692767017	432	cg15543995	chr3	149071795	149071845	CNOT2	Promoter (<=1kb)
14562	V14562	0.51156869	11.71302463	3.49E-30	7.26E-30	0.682698575	432	cg09382101	chr7	32650521	32650571	EIF2AK4	Exon (XM_004010439.3/EIF2AK4, exon 15 of 39)
15527	V15527	0.511559134	11.71275622	3.50E-30	7.27E-30	0.676110439	432	cg10157349	chr3	202587346	202587396	ETV6	Exon (XM_004007556.2/ETV6, exon 7 of 9)
31331	V31331	0.511539833	11.71221413	3.52E-30	7.31E-30	0.686400037	432	cg22691636	chr9	40863115	40863165	YTHDF3	3' UTR
26250	V26250	0.511500557	11.71111109	3.56E-30	7.39E-30	0.686947109	432	cg18661311	chr23	43791986	43792036	RNMT	Exon (XM_004020516.3/RNMT, exon 7 of 11)
30453	V30453	0.51144556	11.7095666	3.62E-30	7.49E-30	0.690369215	432	cg21949868	chrX	107521565	107521615	SMARCA1	Exon (XM_015105052.1/SMARCA1, exon 24 of 26)
287	V287	0.511390804	11.708029	3.68E-30	7.61E-30	0.667217618	432	cg02864518	chr4	102654396	102654446	LOC101105324	5' UTR
30740	V30740	0.511382738	11.70780249	3.69E-30	7.63E-30	0.686260359	432	cg22201504	chrX	92435291	92435341	ZIC3	Exon (XM_015104737.1/ZIC3, exon 3 of 4)
2947	V2947	0.511354905	11.70702097	3.72E-30	7.68E-30	0.685305894	432	cg00169860	chr25	31234083	31234133	C25H10orf11	Intron (XM_012105395.2/C25H10orf11, intron 2 of 5)
32397	V32397	0.511332944	11.70640436	3.75E-30	7.73E-30	0.663562715	432	cg23545926	chr1	64607862	64607912	LOC101113557	Distal Intergenic
13166	V13166	0.511304529	11.70560653	3.78E-30	7.79E-30	0.685026539	432	cg08286003	chr2	22591956	22592006	MSANTD3	Exon (XM_015093015.1/MSANTD3, exon 3 of 3)
28690	V28690	0.511242267	11.70385852	3.85E-30	7.92E-30	0.674899898	432	cg20562817	chr7	30016215	30016265	LOC105610621	Distal Intergenic
16218	V16218	0.511193786	11.70249748	3.91E-30	8.03E-30	0.724683397	432	cg10707128	chr7	82454126	82454176	VSX2	Promoter (<=1kb)
8567	V8567	0.51117667	11.70201701	3.93E-30	8.06E-30	0.68559689	432	cg04610156	chr5	36147722	36147772	NSD1	Intron (XM_012178282.2/NSD1, intron 10 of 22)
32868	V32868	0.511147057	11.70118576	3.96E-30	8.13E-30	0.665366887	432	cg23923691	chr18	46097335	46097385	SLC25A21	Intron (XM_004017901.3/SLC25A21, intron 1 of 9)
2871	V2871	0.511120403	11.70043757	3.99E-30	8.19E-30	0.674189869	432	cg00109303	chr14	21741643	21741693	FTO	Intron (NM_001104931.1/FTO, intron 8 of 8)
24849	V24849	0.511110996	11.70017353	4.00E-30	8.20E-30	0.678217246	432	cg17524006	chrX	120500159	120500209	FRMPD3	Exon (XM_004022732.3/FRMPD3, exon 1 of 15)
14004	V14004	0.511060158	11.6987466	4.07E-30	8.32E-30	0.677786572	432	cg08945781	chr22	17435960	17436010	LOC101112525	5' UTR
35150	V35150	0.510976839	11.69640822	4.17E-30	8.52E-30	0.678717758	432	cg25801549	chr23	47315100	47315150	SKOR2	Distal Intergenic
3710	V3710	0.510942559	11.6954462	4.21E-30	8.60E-30	0.680114536	432	cg00788669	chr6	17861797	17861847	TRNAS-GGA	Distal Intergenic
5048	V5048	0.51092183	11.69486452	4.24E-30	8.64E-30	0.67983518	432	cg01841970	chr2	163028121	163028171	LOC101114685	Distal Intergenic
10666	V10666	0.510856065	11.69301911	4.32E-30	8.80E-30	0.684141913	432	cg06313543	chr19	30383521	30383571	FOXP1	Intron (XM_015102109.1/FOXP1, intron 5 of 17)
7806	V7806	0.510838516	11.69252673	4.34E-30	8.84E-30	0.668241922	432	cg04016899	chr13	75243538	75243588	ZMYND8	Exon (XM_015099511.1/ZMYND8, exon 17 of 26)
35355	V35355	0.510826001	11.69217558	4.36E-30	8.87E-30	0.694932023	432	cg25959798	chr3	62959273	62959323	PAPOLG	3' UTR
33189	V33189	0.51082007	11.69200915	4.37E-30	8.88E-30	0.683920756	432	cg24208420	chr3	68456594	68456644	CCDC88A	Exon (XM_012171252.2/CCDC88A, exon 8 of 31)
24318	V24318	0.510815405	11.69187827	4.38E-30	8.88E-30	0.674376106	432	cg17097703	chr1	244167412	244167462	TRPC1	Exon (XM_012102059.2/TRPC1, exon 2 of 12)
1738	V1738	0.510802172	11.69150697	4.39E-30	8.91E-30	0.669336065	432	cg17659328
34318	V34318	0.510700783	11.68866249	4.53E-30	9.17E-30	0.683827638	432	cg25136868	chr3	62969529	62969579	PAPOLG	Exon (XM_012170877.2/PAPOLG, exon 11 of 23)
36457	V36457	0.510648004	11.68718193	4.60E-30	9.30E-30	0.671664028	432	cg26851215	chr18	42659732	42659782	NPAS3	Intron (XM_015101805.1/NPAS3, intron 3 of 15)
8666	V8666	0.510596502	11.6857373	4.67E-30	9.43E-30	0.660303566	432	cg04690272	chr1	27477065	27477115	LRP8	Exon (XM_015091990.1/LRP8, exon 20 of 21)
34549	V34549	0.510499492	11.68301646	4.81E-30	9.68E-30	0.671186796	432	cg25338834	chr1	201218302	201218352	ABCC5	Intron (XM_004003102.2/ABCC5, intron 10 of 29)
13678	V13678	0.510494758	11.68288369	4.82E-30	9.69E-30	0.711309247	432	cg08693303	chr20	23099670	23099720	TFAP2B	Intron (XM_015102745.1/TFAP2B, intron 8 of 8)
5132	V5132	0.510489045	11.68272346	4.82E-30	9.70E-30	0.698528727	432	cg01919381	chr1	26553261	26553311	ZCCHC11	3' UTR
4443	V4443	0.510369369	11.67936743	5.00E-30	1.00E-29	0.68559689	432	cg01370575	chr18	32923916	32923966	CLK3	Exon (XM_015101988.1/CLK3, exon 3 of 12)
24049	V24049	0.510271769	11.67663088	5.15E-30	1.03E-29	0.689950182	432	cg16895245	chr5	35409298	35409348	FAF2	Exon (XM_004008699.3/FAF2, exon 5 of 11)
33615	V33615	0.510209378	11.67488175	5.24E-30	1.05E-29	0.679125151	432	cg24545857	chr9	84400386	84400436	RUNX1T1	Distal Intergenic
14295	V14295	0.51020702	11.67481562	5.25E-30	1.05E-29	0.662177577	432	cg09170982	chr9	73132433	73132483	RIMS2	Promoter (<=1kb)
7339	V7339	0.510192745	11.67441544	5.27E-30	1.06E-29	0.675132694	432	cg03640592	chr14	37559612	37559662	ZFHX3	Intron (XM_015100188.1/ZFHX3, intron 5 of 14)
23810	V23810	0.510111829	11.67214724	5.40E-30	1.08E-29	0.687575659	432	cg16708405	chr3	46651628	46651678	USP34	Exon (XM_015094329.1/USP34, exon 74 of 79)
7681	V7681	0.510089665	11.67152596	5.43E-30	1.09E-29	0.685119657	432	cg03913353	chr24	30048969	30049019	LOC105604757	Distal Intergenic
5527	V5527	0.510061617	11.67073982	5.48E-30	1.09E-29	0.675726325	432	cg02195448	chr2	164419415	164419465	ZEB2	Intron (XM_012138277.2/ZEB2, intron 1 of 14)
34339	V34339	0.510036423	11.67003368	5.52E-30	1.10E-29	0.653331316	432	cg25156086	chr9	5165855	5165905	ADGRB3	3' UTR
10157	V10157	0.510029056	11.66982719	5.53E-30	1.10E-29	0.687750256	432	cg05901467	chr1	272383932	272383982	TBC1D5	Intron (XM_015092720.1/TBC1D5, intron 3 of 25)
35824	V35824	0.510001186	11.66904611	5.58E-30	1.11E-29	0.681581153	432	cg26317051	chr7	72666837	72666887	PPP2R5E	Exon (XM_012181792.1/PPP2R5E, exon 1 of 13)
5696	V5696	0.509997965	11.66895584	5.59E-30	1.11E-29	0.685410653	432	cg02320378	chr16	17867057	17867107	ZSWIM6	3' UTR
16832	V16832	0.509985254	11.66859959	5.61E-30	1.11E-29	0.711844678	432	cg11201611
27793	V27793	0.509954178	11.66772868	5.66E-30	1.12E-29	0.679381227	432	cg19859330	chr2	18910707	18910757	SMC2	Exon (XM_004004038.2/SMC2, exon 25 of 25)
28334	V28334	0.50992234	11.66683647	5.71E-30	1.13E-29	0.674876618	432	cg20281703	chr1	177639617	177639667	LOC105602007	Intron (XR_001020604.2/LOC105602007, intron 5 of 6)
11929	V11929	0.509894806	11.66606492	5.76E-30	1.14E-29	0.720795698	432	cg07254032	chr16	29105863	29105913	HCN1	Promoter (<=1kb)
15495	V15495	0.50983868	11.6644922	5.86E-30	1.16E-29	0.684723904	432	cg10132456	chr9	40863805	40863855	YTHDF3	3' UTR
17871	V17871	0.509766026	11.66245656	5.99E-30	1.18E-29	0.669440823	432	cg12069228	chr7	14326964	14327014	MAP2K5	Intron (XM_012180834.2/MAP2K5, intron 16 of 17)
22417	V22417	0.509708136	11.66083473	6.09E-30	1.20E-29	0.667892727	432	cg15593664	chr14	43964032	43964082	GPI	Promoter (8-9kb)
29851	V29851	0.509686424	11.66022647	6.13E-30	1.21E-29	0.719224323	432	cg21487207	chr3	132191676	132191726	HOXC8	Distal Intergenic
23126	V23126	0.509685262	11.66019391	6.13E-30	1.21E-29	0.678275445	432	cg16150541	chr16	3206869	3206919	TLX3	Distal Intergenic
24952	V24952	0.509678799	11.66001287	6.14E-30	1.21E-29	0.671885185	432	cg17605604	chr5	99461694	99461744	C5H5orf30	3' UTR
12027	V12027	0.50965937	11.6594686	6.18E-30	1.22E-29	0.657149176	432	cg07323054	chrX	60429892	60429942	NLGN3	Exon (XM_004022166.3/NLGN3, exon 3 of 8)
12512	V12512	0.509637041	11.65884311	6.22E-30	1.22E-29	0.687680417	432	cg07739774	chr2	84321510	84321560	BNC2	Intron (XM_015093230.1/BNC2, intron 3 of 3)
18949	V18949	0.509507036	11.65520174	6.47E-30	1.27E-29	0.68812273	432	cg12933686	chr11	8032731	8032781	MSI2	3' UTR
1361	V1361	0.509330797	11.6502664	6.81E-30	1.33E-29	0.66451718	432	cg13496662
25440	V25440	0.509270779	11.64858597	6.94E-30	1.35E-29	0.694617748	432	cg17999142	chr1	37476954	37477004	DOCK7	Exon (XM_012164017.2/DOCK7, exon 13 of 39)
19044	V19044	0.509208385	11.64683915	7.07E-30	1.38E-29	0.714591675	432	cg12997720	chr4	68820649	68820699	HOXA11	5' UTR
35786	V35786	0.509205228	11.64675077	7.07E-30	1.38E-29	0.656183071	432	cg26289105	chr15	26284912	26284962	LOC105602189	Distal Intergenic
21408	V21408	0.509196465	11.64650543	7.09E-30	1.38E-29	0.683932396	432	cg14812813	chr1	183954596	183954646	STXBP5L	Exon (XM_004002958.3/STXBP5L, exon 20 of 28)
9757	V9757	0.509162524	11.64555529	7.16E-30	1.39E-29	0.679055312	432	cg05573165	chr13	17831311	17831361	PARD3	Exon (XM_015099560.1/PARD3, exon 15 of 23)
10144	V10144	0.509126619	11.64455019	7.24E-30	1.41E-29	0.68497998	432	cg05892496	chr18	40593174	40593224	HECTD1	Exon (XM_012098773.2/HECTD1, exon 24 of 42)
25295	V25295	0.509094372	11.64364756	7.31E-30	1.42E-29	0.680696527	432	cg17876895	chr6	102419817	102419867	WFS1	Exon (XM_012180512.2/WFS1, exon 8 of 13)
24368	V24368	0.509065114	11.64282861	7.37E-30	1.43E-29	0.695583853	432	cg17133467	chr2	240423619	240423669	TMEM57	3' UTR
12593	V12593	0.509053254	11.64249665	7.40E-30	1.43E-29	0.665751001	432	cg07806801	chr15	25156664	25156714	CADM1	3' UTR
27020	V27020	0.509046781	11.64231547	7.41E-30	1.43E-29	0.68111556	432	cg19289878	chr2	154019802	154019852	GALNT13	Exon (XM_004004690.3/GALNT13, exon 10 of 13)
7779	V7779	0.508964414	11.6400102	7.60E-30	1.47E-29	0.690636931	432	cg03989854	chr22	38835344	38835394	INPP5F	Exon (XM_012103020.1/INPP5F, exon 16 of 20)
7295	V7295	0.508962042	11.63994382	7.60E-30	1.47E-29	0.720551262	432	cg03603629	chr22	21006879	21006929	KAZALD1	Distal Intergenic
33469	V33469	0.508958861	11.6398548	7.61E-30	1.47E-29	0.685201136	432	cg24420625	chr19	14699145	14699195	NKTR	5' UTR
3033	V3033	0.508934197	11.63916458	7.67E-30	1.48E-29	0.665553124	432	cg00239815	chr18	58559277	58559327	DICER1	Distal Intergenic
8000	V8000	0.5089117	11.638535	7.72E-30	1.49E-29	0.675144334	432	cg04174442	chr1	227640102	227640152	SHOX2	Distal Intergenic
28273	V28273	0.508910153	11.63849172	7.72E-30	1.49E-29	0.675970761	432	cg20236392	chr2	183410680	183410730	C1QL2	Distal Intergenic
7949	V7949	0.508877188	11.63756922	7.80E-30	1.50E-29	0.707980259	432	cg04129576	chr3	10216227	10216277	PBX3	Intron (XM_012162805.2/PBX3, intron 4 of 10)
2805	V2805	0.508821935	11.63602316	7.93E-30	1.52E-29	0.750477233	432	cg00061093	chr22	41769074	41769124	HMX2	Promoter (3-4kb)
23408	V23408	0.508787121	11.63504906	8.01E-30	1.54E-29	0.693989198	432	cg16384274	chr1	45542972	45543022	SRSF11	Exon (XM_012173588.2/SRSF11, exon 3 of 13)
32835	V32835	0.508666199	11.63166604	8.30E-30	1.59E-29	0.690101499	432	cg23885558	chr2	164505989	164506039	ZEB2	Intron (XM_012138277.2/ZEB2, intron 11 of 14)
27888	V27888	0.508643769	11.63103857	8.36E-30	1.60E-29	0.721878201	432	cg19936176	chr23	20028077	20028127	CELF4	Exon (XM_015103584.1/CELF4, exon 9 of 10)
22197	V22197	0.508530899	11.62788142	8.64E-30	1.65E-29	0.687319583	432	cg15411708	chr4	93696398	93696448	UBE2H	5' UTR
10556	V10556	0.508393389	11.6240357	9.00E-30	1.72E-29	0.667392215	432	cg06216197	chr24	22223532	22223582	RBBP6	Intron (XM_004020845.3/RBBP6, intron 3 of 16)
32313	V32313	0.508347171	11.62274329	9.13E-30	1.74E-29	0.70023978	432	cg23480112	chr15	38498220	38498270	FAR1	Exon (XM_012095716.2/FAR1, exon 6 of 11)
33502	V33502	0.508346845	11.62273418	9.13E-30	1.74E-29	0.677693454	432	cg24455383	chr12	31634558	31634608	AKT3	Intron (XM_012187197.2/AKT3, intron 6 of 11)
11206	V11206	0.508341299	11.62257911	9.14E-30	1.74E-29	0.68368796	432	cg06710458	chr20	23809419	23809469	PKHD1	Intron (XM_015102755.1/PKHD1, intron 59 of 64)
3394	V3394	0.508328596	11.62222391	9.18E-30	1.75E-29	0.67091908	432	cg00540706	chr1	216167144	216167194	MECOM	Exon (XM_012099727.1/MECOM, exon 8 of 16)
13507	V13507	0.508296379	11.62132308	9.27E-30	1.77E-29	0.671326474	432	cg08570512	chr4	101063169	101063219	DGKI	Exon (XM_015095118.1/DGKI, exon 7 of 33)
6110	V6110	0.508274604	11.62071425	9.33E-30	1.78E-29	0.670988919	432	cg02638021	chr8	32519410	32519460	LOC105613327	Distal Intergenic
15503	V15503	0.508256165	11.62019871	9.38E-30	1.78E-29	0.673596238	432	cg10138291	chr14	37786802	37786852	LOC106991599	Intron (XR_001435702.1/LOC106991599, intron 2 of 4)
18724	V18724	0.508254412	11.62014971	9.38E-30	1.78E-29	0.675016296	432	cg12760766	chr26	29752957	29753007	UNC5D	Intron (XM_004021770.3/UNC5D, intron 3 of 16)
34281	V34281	0.508151047	11.61725994	9.67E-30	1.84E-29	0.67920663	432	cg25108269	chr3	9541926	9541976	MVB12B	Intron (XM_015094187.1/MVB12B, intron 7 of 9)
23567	V23567	0.508147007	11.617147	9.69E-30	1.84E-29	0.667613372	432	cg16524811	chr15	36692084	36692134	LOC105602234	Distal Intergenic
12169	V12169	0.508113761	11.61621764	9.78E-30	1.85E-29	0.683362045	432	cg07443558	chr1	63775672	63775722	LMO4	Distal Intergenic
34408	V34408	0.508039595	11.61414455	1.00E-29	1.89E-29	0.701392122	432	cg25228765	chr9	76570406	76570456	RNF19A	Exon (XM_012184055.2/RNF19A, exon 2 of 10)
5577	V5577	0.508000068	11.61303977	1.01E-29	1.91E-29	0.682733495	432	cg02230564	chr22	41812024	41812074	BUB3	Distal Intergenic
28717	V28717	0.5079763	11.61237549	1.02E-29	1.93E-29	0.680766366	432	cg20589448	chr16	22410494	22410544	MAP3K1	Exon (XM_004016971.3/MAP3K1, exon 6 of 20)
17989	V17989	0.507961984	11.61197539	1.02E-29	1.93E-29	0.667508613	432	cg12166338	chr3	198500182	198500232	DERA	Intron (XM_004006820.3/DERA, intron 6 of 8)
25364	V25364	0.507949146	11.61161661	1.03E-29	1.94E-29	0.682605457	432	cg17936504	chr23	3785941	3785991	ZNF407	Intron (XM_015103570.1/ZNF407, intron 3 of 9)
31995	V31995	0.507912648	11.61059661	1.04E-29	1.96E-29	0.693186051	432	cg23214861	chr16	25160927	25160977	ARL15	Intron (XM_004016996.3/ARL15, intron 4 of 4)
10689	V10689	0.507813309	11.60782071	1.07E-29	2.01E-29	0.677600335	432	cg06330726
24159	V24159	0.507629614	11.60268854	1.13E-29	2.12E-29	0.701124406	432	cg16979981	chr3	76420023	76420073	FBXO11	3' UTR
15320	V15320	0.507626203	11.60259326	1.13E-29	2.12E-29	0.692638979	432	cg09975195	chr3	175703496	175703546	BTBD11	Exon (XM_015093958.1/BTBD11, exon 8 of 18)
37099	V37099	0.507473837	11.59833739	1.18E-29	2.21E-29	0.684537666	432	cg27369540	chr1	196509067	196509117	LOC105602682	Distal Intergenic
19684	V19684	0.507463935	11.59806083	1.19E-29	2.22E-29	0.722646429	432	cg13477804	chr3	132549126	132549176	ATP5G2	Promoter (1-2kb)
11085	V11085	0.507406785	11.59646478	1.21E-29	2.26E-29	0.650293323	432	cg06623258	chr1	24349033	24349083	ELAVL4	Promoter (<=1kb)
9283	V9283	0.507363145	11.59524611	1.22E-29	2.28E-29	0.671896825	432	cg05196683	chr14	45447198	45447248	KMT2B	Promoter (<=1kb)
21033	V21033	0.507352269	11.59494242	1.23E-29	2.29E-29	0.677565416	432	cg14529996	chr11	40178305	40178355	TOP2A	Exon (XM_012186068.2/TOP2A, exon 4 of 35)
16765	V16765	0.507335816	11.59448298	1.23E-29	2.30E-29	0.666274793	432	cg11150293	chr6	90066403	90066453	G3BP2	5' UTR
18415	V18415	0.507324444	11.59416542	1.24E-29	2.30E-29	0.671955024	432	cg12488664	chr8	71477949	71477999	STXBP5	Exon (XM_004011402.3/STXBP5, exon 9 of 28)
18858	V18858	0.507322748	11.59411806	1.24E-29	2.30E-29	0.685655089	432	cg12861374	chr20	44917889	44917939	LOC101117887	Intron (XM_015102853.1/LOC101117887, intron 4 of 5)
29704	V29704	0.507272582	11.59271731	1.25E-29	2.34E-29	0.684211752	432	cg21364331	chr22	21445226	21445276	POLL	Distal Intergenic
25196	V25196	0.507244177	11.59192424	1.27E-29	2.35E-29	0.678473322	432	cg17799518	chr14	41071968	41072018	TSHZ3	Distal Intergenic
34944	V34944	0.50715978	11.58956798	1.30E-29	2.40E-29	0.735857622	432	cg25636884	chr8	32138254	32138304	LIN28B	5' UTR
30759	V30759	0.507139436	11.58900004	1.31E-29	2.42E-29	0.681813949	432	cg22213043	chr21	39222428	39222478	CPSF7	Intron (XM_015103135.1/CPSF7, intron 2 of 8)
32923	V32923	0.507073001	11.58714552	1.33E-29	2.46E-29	0.677460657	432	cg23968328	chr17	33969130	33969180	SPRY1	Distal Intergenic
18917	V18917	0.507044497	11.58634988	1.34E-29	2.48E-29	0.679602384	432	cg12906630	chr11	20374655	20374705	TAOK1	Exon (XM_004012516.3/TAOK1, exon 14 of 20)
4924	V4924	0.507038617	11.58618577	1.34E-29	2.48E-29	0.68111556	432	cg01743293	chr15	43762665	43762715	LMO1	Intron (XM_015101044.1/LMO1, intron 1 of 3)
15410	V15410	0.507000336	11.58511728	1.36E-29	2.51E-29	0.696363721	432	cg10051720	chr6	70812731	70812781	CLOCK	Intron (XM_012179341.1/CLOCK, intron 10 of 17)
31292	V31292	0.50700023	11.58511432	1.36E-29	2.51E-29	0.689018996	432	cg22667099	chr22	36250114	36250164	SHTN1	Intron (XM_012102997.2/SHTN1, intron 3 of 16)
10294	V10294	0.506975827	11.58443322	1.37E-29	2.52E-29	0.687133346	432	cg06008935	chr1	203475287	203475337	LOC105603067	Exon (XR_001022021.2/LOC105603067, exon 1 of 2)
19933	V19933	0.506919657	11.58286557	1.39E-29	2.56E-29	0.684735543	432	cg13671198	chr3	10216461	10216511	PBX3	Intron (XM_012162805.2/PBX3, intron 4 of 10)
16054	V16054	0.506919282	11.5828551	1.39E-29	2.56E-29	0.696654716	432	cg10585736	chr15	25662260	25662310	LOC105602182	Promoter (4-5kb)
13705	V13705	0.506891427	11.58207775	1.40E-29	2.58E-29	0.689926902	432	cg08706469	chr17	61610158	61610208	HECTD4	Exon (XM_012097892.2/HECTD4, exon 25 of 77)
32532	V32532	0.506804914	11.57966358	1.44E-29	2.64E-29	0.680405531	432	cg23650312	chrX	92435287	92435337	ZIC3	Exon (XM_015104737.1/ZIC3, exon 3 of 4)
20799	V20799	0.506706395	11.57691475	1.48E-29	2.72E-29	0.683746159	432	cg14368704	chr22	21185088	21185138	LOC105604254	Distal Intergenic
752	V752	0.506678936	11.57614867	1.50E-29	2.74E-29	0.672932768	432	cg07355869	chr13	15107908	15107958	CELF2	Exon (XM_015099432.1/CELF2, exon 15 of 16)
10572	V10572	0.506657207	11.57554245	1.50E-29	2.75E-29	0.679730422	432	cg06227366	chr2	116588768	116588818	WDR33	Exon (XM_012130478.2/WDR33, exon 6 of 19)
10354	V10354	0.506654263	11.57546032	1.51E-29	2.75E-29	0.704499953	432	cg06055800
19075	V19075	0.506649882	11.57533811	1.51E-29	2.75E-29	0.680568489	432	cg13021533	chr16	2973238	2973288	RANBP17	Intron (XM_012096710.1/RANBP17, intron 14 of 27)
4148	V4148	0.50663324	11.57487384	1.52E-29	2.76E-29	0.670313809	432	cg01130418	chr7	81442647	81442697	RBM25	Intron (XM_004010769.3/RBM25, intron 9 of 18)
36076	V36076	0.50660846	11.57418258	1.53E-29	2.78E-29	0.686085762	432	cg26525059	chr8	39697647	39697697	KLHL32	Intron (XM_012182745.1/KLHL32, intron 4 of 8)
6499	V6499	0.506559423	11.57281467	1.55E-29	2.82E-29	0.69071841	432	cg02965730	chr15	40254904	40254954	USP47	3' UTR
35056	V35056	0.506537844	11.57221276	1.56E-29	2.83E-29	0.677181302	432	cg25713925	chr4	92983525	92983575	TNPO3	Exon (XM_015095377.1/TNPO3, exon 8 of 21)
4093	V4093	0.506512224	11.57149814	1.57E-29	2.85E-29	0.682256262	432	cg01088303	chr1	66541560	66541610	ZNF326	Exon (XM_015092093.1/ZNF326, exon 5 of 12)
36530	V36530	0.506502005	11.57121312	1.58E-29	2.86E-29	0.666554148	432	cg26918276	chr25	31234319	31234369	C25H10orf11	Intron (XM_012105395.2/C25H10orf11, intron 2 of 5)
7428	V7428	0.506473998	11.57043196	1.59E-29	2.88E-29	0.658883509	432	cg03709073	chr2	242411309	242411359	HNRNPR	Exon (XM_012152380.2/HNRNPR, exon 7 of 10)
18040	V18040	0.506471005	11.57034849	1.59E-29	2.88E-29	0.656765062	432	cg12206270	chr7	74516468	74516518	FUT8	5' UTR
29078	V29078	0.506470274	11.5703281	1.59E-29	2.88E-29	0.676983425	432	cg20879045	chr19	4556221	4556271	RBMS3	3' UTR
14949	V14949	0.506468796	11.57028687	1.59E-29	2.88E-29	0.695991247	432	cg09658710	chr2	165273383	165273433	ARHGAP15	Intron (XM_004004720.3/ARHGAP15, intron 12 of 13)
31461	V31461	0.506464261	11.57016039	1.59E-29	2.88E-29	0.700006984	432	cg22798915	chr14	37563031	37563081	ZFHX3	Intron (XM_015100188.1/ZFHX3, intron 5 of 14)
15606	V15606	0.506429138	11.56918081	1.61E-29	2.91E-29	0.691079244	432	cg10220846	chr1	68544123	68544173	KIAA1107	Intron (XM_004002191.3/KIAA1107, intron 10 of 16)
571	V571	0.506422884	11.56900639	1.61E-29	2.91E-29	0.678380203	432	cg05647280	chrX	38317234	38317284	USP9X	Intron (XM_004022008.3/USP9X, intron 13 of 44)
14849	V14849	0.506328613	11.56637745	1.66E-29	2.99E-29	0.708387652	432	cg09595479
31867	V31867	0.50630461	11.56570812	1.67E-29	3.01E-29	0.70983099	432	cg23118730	chr7	82453875	82453925	VSX2	Promoter (<=1kb)
2282	V2282	0.506282402	11.56508886	1.68E-29	3.02E-29	0.673991992	432	cg23266553	chr24	6525228	6525278	RBFOX1	Intron (XM_015103814.1/RBFOX1, intron 7 of 16)
13689	V13689	0.506264884	11.56460041	1.69E-29	3.04E-29	0.685317534	432	cg08697532	chr3	10127020	10127070	PBX3	Intron (XM_012162805.2/PBX3, intron 4 of 10)
29177	V29177	0.506247328	11.56411089	1.70E-29	3.05E-29	0.683292206	432	cg20960974	chr2	208769558	208769608	FZD5	3' UTR
5330	V5330	0.506243708	11.56400996	1.70E-29	3.05E-29	0.684095353	432	cg02056765	chr14	6363689	6363739	LOC105609363	Distal Intergenic
10443	V10443	0.506176361	11.56213228	1.73E-29	3.11E-29	0.686493156	432	cg06125958	chr13	39077537	39077587	RALGAPA2	Intron (XM_015099665.1/RALGAPA2, intron 22 of 36)
4115	V4115	0.506174018	11.56206696	1.74E-29	3.11E-29	0.693092932	432	cg01101069	chr1	234638823	234638873	MED12L	Exon (XM_015092592.1/MED12L, exon 24 of 44)
4573	V4573	0.506140492	11.56113228	1.75E-29	3.14E-29	0.677169662	432	cg01468418	chr14	18662572	18662622	LOC105602059	Distal Intergenic
15839	V15839	0.506119787	11.56055508	1.76E-29	3.15E-29	0.696596517	432	cg10422340	chrX	101699923	101699973	GRIA3	Intron (XM_012107365.2/GRIA3, intron 14 of 16)
31281	V31281	0.506111211	11.56031599	1.77E-29	3.16E-29	0.68173247	432	cg22661058	chr3	64908750	64908800	LOC105612568	Intron (XR_001434300.1/LOC105612568, intron 3 of 4)
30269	V30269	0.506109691	11.56027363	1.77E-29	3.16E-29	0.676413074	432	cg21810283	chr1	20804698	20804748	DMBX1	Promoter (5-6kb)
35397	V35397	0.506103917	11.56011266	1.77E-29	3.16E-29	0.679579104	432	cg25997426	chr11	8976527	8976577	MTMR4	3' UTR
7359	V7359	0.506099967	11.56000255	1.77E-29	3.16E-29	0.674864978	432	cg03661236	chr9	22039750	22039800	EFR3A	Exon (XM_012183555.2/EFR3A, exon 21 of 22)
9603	V9603	0.506078551	11.55940556	1.78E-29	3.18E-29	0.662841047	432	cg05443339	chr2	145144396	145144446	FIGN	Distal Intergenic
18470	V18470	0.506052804	11.55868784	1.80E-29	3.20E-29	0.675854363	432	cg12540775	chr7	29541423	29541473	MEIS2	3' UTR
26721	V26721	0.506022967	11.55785616	1.81E-29	3.23E-29	0.689356551	432	cg19044429	chr10	2846726	2846776	DIAPH3	Exon (XM_015098041.1/DIAPH3, exon 27 of 29)
11311	V11311	0.506021274	11.55780897	1.81E-29	3.23E-29	0.670057733	432	cg06783288	chr7	46700717	46700767	RORA	3' UTR
26752	V26752	0.506003766	11.55732096	1.82E-29	3.24E-29	0.66008241	432	cg19075030	chr19	30643382	30643432	FOXP1	Intron (XM_015102109.1/FOXP1, intron 14 of 17)
16556	V16556	0.505973752	11.55648438	1.84E-29	3.27E-29	0.670639724	432	cg10989366	chr22	41812122	41812172	BUB3	Distal Intergenic
18903	V18903	0.505907878	11.55464845	1.88E-29	3.33E-29	0.681336717	432	cg12898126	chr7	14214919	14214969	MAP2K5	Intron (XM_012180834.2/MAP2K5, intron 7 of 17)
19721	V19721	0.505903039	11.55451358	1.88E-29	3.33E-29	0.710063786	432	cg13505793	chr7	8582892	8582942	OTP	Intron (XM_015096753.1/OTP, intron 3 of 7)
8952	V8952	0.505885726	11.55403109	1.89E-29	3.34E-29	0.676482913	432	cg04941359	chr2	91400143	91400193	ELAVL2	3' UTR
5970	V5970	0.505849641	11.55302547	1.91E-29	3.38E-29	0.689112115	432	cg02533142	chr19	31083848	31083898	LOC105603445	Distal Intergenic
17635	V17635	0.505834192	11.55259497	1.92E-29	3.39E-29	0.689018996	432	cg11868140	chr1	205775607	205775657	MFN1	Exon (XM_012098611.2/MFN1, exon 7 of 15)
22171	V22171	0.505801238	11.55167666	1.94E-29	3.42E-29	0.672001583	432	cg15383869	chr7	14350817	14350867	MAP2K5	Intron (XM_004010259.3/MAP2K5, intron 17 of 21)
27369	V27369	0.5057836	11.55118517	1.95E-29	3.43E-29	0.68237266	432	cg19553300	chr2	164468620	164468670	ZEB2	Intron (XM_012138277.2/ZEB2, intron 7 of 14)
8626	V8626	0.505774896	11.55094264	1.95E-29	3.43E-29	0.675761244	432	cg04661272	chr13	77547085	77547135	UBE2V1	Promoter (<=1kb)
34356	V34356	0.505773901	11.55091491	1.95E-29	3.43E-29	0.686027563	432	cg25171965	chr15	53987449	53987499	EMSY	Exon (XM_004016336.3/EMSY, exon 19 of 21)
21168	V21168	0.505757259	11.55045122	1.96E-29	3.45E-29	0.663935189	432	cg14631165	chr17	11408619	11408669	POU4F2	Promoter (<=1kb)
26335	V26335	0.50575307	11.55033449	1.96E-29	3.45E-29	0.675167613	432	cg18725340	chr6	91984893	91984943	CNOT6L	Intron (XM_012180234.2/CNOT6L, intron 5 of 10)
16012	V16012	0.505736804	11.54988126	1.97E-29	3.46E-29	0.694745786	432	cg10555778	chr2	51149753	51149803	ZCCHC7	Intron (XM_015093142.1/ZCCHC7, intron 6 of 8)
34955	V34955	0.50571891	11.54938269	1.98E-29	3.48E-29	0.658732191	432	cg25646471	chrX	29717394	29717444	DMD	Exon (XM_012106463.1/DMD, exon 41 of 78)
16853	V16853	0.505717931	11.5493554	1.98E-29	3.48E-29	0.68686563	432	cg11212450	chr13	17831399	17831449	PARD3	Exon (XM_015099560.1/PARD3, exon 15 of 23)
17594	V17594	0.505714679	11.54926482	1.99E-29	3.48E-29	0.66387699	432	cg11832376	chr5	58067173	58067223	ABLIM3	Intron (XM_012178757.2/ABLIM3, intron 12 of 23)
3703	V3703	0.505699043	11.54882915	2.00E-29	3.49E-29	0.684491107	432	cg00785909	chr5	90314256	90314306	LOC105607625	Intron (XR_001434644.1/LOC105607625, intron 2 of 8)
30174	V30174	0.505680332	11.54830786	2.01E-29	3.51E-29	0.676122078	432	cg21736136	chr18	47894570	47894620	SEC23A	Exon (XM_004017906.3/SEC23A, exon 13 of 20)
11492	V11492	0.505619668	11.54661777	2.04E-29	3.57E-29	0.685201136	432	cg06910518	chr23	30992701	30992751	SS18	Exon (XM_012103456.2/SS18, exon 8 of 11)
2407	V2407	0.505587188	11.54571296	2.06E-29	3.60E-29	0.720853897	432	cg24551749	chr3	132549098	132549148	ATP5G2	Promoter (1-2kb)
1926	V1926	0.505578116	11.54546024	2.07E-29	3.60E-29	0.674993016	432	cg19646128	chr22	32524167	32524217	TCF7L2	Intron (XM_015103420.1/TCF7L2, intron 5 of 14)
34276	V34276	0.505417217	11.54097856	2.17E-29	3.77E-29	0.677646894	432	cg25104121	chr12	25577570	25577620	WDR26	3' UTR
16566	V16566	0.505380953	11.5399686	2.19E-29	3.81E-29	0.685794767	432	cg10995424	chr13	32531011	32531061	ARHGAP12	Exon (XM_015099608.1/ARHGAP12, exon 4 of 19)
21466	V21466	0.505328127	11.53849747	2.23E-29	3.86E-29	0.688099451	432	cg14861451	chr17	17969562	17969612	NAA15	3' UTR
15498	V15498	0.505315792	11.53815398	2.23E-29	3.88E-29	0.675691405	432	cg10133293	chr2	133339934	133339984	LOC105609068	Distal Intergenic
8449	V8449	0.505279342	11.53713899	2.26E-29	3.92E-29	0.680393891	432	cg04534032	chr7	63756523	63756573	LOC105610712	Intron (XR_001434945.1/LOC105610712, intron 1 of 2)
23151	V23151	0.505228258	11.53571656	2.29E-29	3.97E-29	0.679718782	432	cg16169211	chr2	75938432	75938482	PTPRD	Intron (XM_012125604.1/PTPRD, intron 5 of 32)
19187	V19187	0.505221352	11.53552428	2.30E-29	3.98E-29	0.678636279	432	cg13103407	chr22	17442308	17442358	LOC101112525	Exon (XM_015103352.1/LOC101112525, exon 7 of 7)
11914	V11914	0.505143594	11.53335934	2.35E-29	4.06E-29	0.692720458	432	cg07241696	chr2	235489167	235489217	PUM1	3' UTR
4660	V4660	0.505108703	11.53238798	2.37E-29	4.10E-29	0.677705094	432	cg01531932	chr10	47301169	47301219	DACH1	Distal Intergenic
9305	V9305	0.505107659	11.53235893	2.37E-29	4.10E-29	0.66263153	432	cg05205094	chr16	14276515	14276565	ADAMTS6	3' UTR
15477	V15477	0.505097636	11.5320799	2.38E-29	4.11E-29	0.670162492	432	cg10113893	chr15	60629649	60629699	ELP4	Intron (XM_004016368.3/ELP4, intron 9 of 9)
29263	V29263	0.505079304	11.53156955	2.39E-29	4.13E-29	0.700356178	432	cg21028063	chr9	52542505	52542555	ZFHX4	Intron (XM_012183892.2/ZFHX4, intron 1 of 10)
8115	V8115	0.505060669	11.5310508	2.41E-29	4.15E-29	0.686062483	432	cg04268384	chr2	131534090	131534140	AGPS	Exon (XM_015093340.1/AGPS, exon 10 of 20)
23784	V23784	0.505019027	11.52989164	2.44E-29	4.20E-29	0.722727908	432	cg16691593
4447	V4447	0.504974279	11.52864606	2.47E-29	4.25E-29	0.699925505	432	cg01374277	chr6	69452254	69452304	CHIC2	Intron (XM_004009829.2/CHIC2, intron 5 of 5)
15255	V15255	0.50487202	11.52579999	2.54E-29	4.37E-29	0.714591675	432	cg09911121	chr3	132155271	132155321	HOXC4	Promoter (<=1kb)
28039	V28039	0.50486711	11.52566335	2.55E-29	4.37E-29	0.699378434	432	cg20050736	chr26	35412250	35412300	KAT6A	5' UTR
34900	V34900	0.504855794	11.52534841	2.56E-29	4.38E-29	0.692534221	432	cg25601175	chr8	37421295	37421345	PNISR	Intron (XM_004011253.2/PNISR, intron 5 of 11)
36812	V36812	0.504849043	11.52516054	2.56E-29	4.39E-29	0.689985101	432	cg27133206	chr1	94321946	94321996	GDAP2	Exon (XM_004002382.2/GDAP2, exon 9 of 14)
12414	V12414	0.50473363	11.52194892	2.65E-29	4.53E-29	0.683257287	432	cg07662116	chr22	30390409	30390459	SHOC2	Exon (XM_004020195.3/SHOC2, exon 2 of 9)
25807	V25807	0.504716423	11.52147014	2.66E-29	4.55E-29	0.669859857	432	cg18301725	chr17	7020198	7020248	LRBA	Intron (XM_015101368.1/LRBA, intron 37 of 56)
6871	V6871	0.504667125	11.5200985	2.70E-29	4.61E-29	0.671966664	432	cg03263465	chr2	198660672	198660722	SF3B1	Promoter (<=1kb)
27147	V27147	0.504592895	11.51803332	2.76E-29	4.71E-29	0.670057733	432	cg19382448	chr23	22584448	22584498	DTNA	Intron (XM_012103378.2/DTNA, intron 2 of 19)
12384	V12384	0.504548487	11.51679794	2.80E-29	4.77E-29	0.673945433	432	cg07636487	chr7	81251421	81251471	DPF3	Intron (XM_012181974.2/DPF3, intron 1 of 10)
19046	V19046	0.504423312	11.51331612	2.90E-29	4.93E-29	0.674888258	432	cg12999414	chr3	41579718	41579768	MEIS1	3' UTR
18802	V18802	0.50441469	11.5130763	2.91E-29	4.94E-29	0.677227861	432	cg12818942	chr8	36463551	36463601	ASCC3	Intron (XM_012182723.2/ASCC3, intron 39 of 41)
2765	V2765	0.5043933	11.51248139	2.93E-29	4.97E-29	0.675563367	432	cg00036621	chr7	66637814	66637864	NAA30	Exon (XM_015097090.1A30, exon 1 of 3)
11000	V11000	0.504392352	11.51245503	2.93E-29	4.97E-29	0.704686191	432	cg06561225	chr11	62025440	62025490	HELZ	Exon (XM_004013156.2/HELZ, exon 14 of 34)
28420	V28420	0.504372483	11.51190244	2.95E-29	4.99E-29	0.68366468	432	cg20350922	chr19	30652405	30652455	FOXP1	Intron (XM_015102109.1/FOXP1, intron 16 of 17)
30450	V30450	0.504268786	11.50901869	3.04E-29	5.14E-29	0.694606109	432	cg21949505	chr11	48566031	48566081	PITPNC1	Exon (XM_015098885.1/PITPNC1, exon 9 of 10)
30000	V30000	0.504248325	11.50844973	3.05E-29	5.17E-29	0.729409163	432	cg21607628	chr7	14445486	14445536	SKOR1	Intron (XM_015096709.1/SKOR1, intron 8 of 9)
35554	V35554	0.504240551	11.50823355	3.06E-29	5.17E-29	0.672048142	432	cg26113820	chr7	67463095	67463145	ARID4A	Exon (XM_012181719.2/ARID4A, exon 3 of 24)
29967	V29967	0.5041929	11.50690859	3.10E-29	5.24E-29	0.669405904	432	cg21583851	chr4	44596012	44596062	SLC26A5	Exon (XM_015095256.1/SLC26A5, exon 6 of 18)
16917	V16917	0.504183227	11.50663965	3.11E-29	5.26E-29	0.677868051	432	cg11256338	chr2	192118453	192118503	GLS	5' UTR
30939	V30939	0.504074957	11.5036295	3.21E-29	5.42E-29	0.681825589	432	cg22367907	chr12	10158367	10158417	B3GALT2	Exon (XM_004013581.3/B3GALT2, exon 2 of 2)
21849	V21849	0.504014041	11.50193607	3.27E-29	5.51E-29	0.673095726	432	cg15148945	chr13	22131538	22131588	DNAJC1	Intron (XM_004014216.3/DNAJC1, intron 3 of 11)
7444	V7444	0.503978848	11.50095779	3.30E-29	5.56E-29	0.6722111	432	cg03723285
25221	V25221	0.503966101	11.50060348	3.32E-29	5.58E-29	0.688565043	432	cg17824274	chr2	142697587	142697637	GALNT3	Exon (XM_012135249.2/GALNT3, exon 7 of 11)
15533	V15533	0.503950276	11.50016361	3.33E-29	5.60E-29	0.663329919	432	cg10162464	chr4	111631165	111631215	LOC101107593	Promoter (<=1kb)
16991	V16991	0.503878262	11.49816204	3.40E-29	5.71E-29	0.68497998	432	cg11324043	chr5	91289866	91289916	SLF1	Exon (XM_004009082.2/SLF1, exon 20 of 21)
30703	V30703	0.503860078	11.49765665	3.42E-29	5.74E-29	0.677123103	432	cg22174647	chrX	60792692	60792742	OGT	Intron (XM_004022177.3/OGT, intron 4 of 21)
26854	V26854	0.503840565	11.49711437	3.44E-29	5.77E-29	0.674445945	432	cg19147719	chr3	31377864	31377914	ATAD2B	Intron (XM_012165522.2/ATAD2B, intron 16 of 28)
12239	V12239	0.503781301	11.4954674	3.50E-29	5.86E-29	0.696584878	432	cg07509309	chr2	182346253	182346303	LOC105609881	Distal Intergenic
8108	V8108	0.503757635	11.49480975	3.53E-29	5.90E-29	0.677658534	432	cg04264612	chr9	74555271	74555321	UBR5	Exon (XM_015097892.1/UBR5, exon 9 of 59)
25245	V25245	0.503691264	11.49296549	3.59E-29	6.01E-29	0.68624872	432	cg17842740	chr3	131119844	131119894	VEZT	Exon (XM_004006262.3/VEZT, exon 5 of 12)
32688	V32688	0.50368944	11.4929148	3.60E-29	6.01E-29	0.670337089	432	cg23774769	chr3	94220132	94220182	EXOC6B	Exon (XM_012173629.2/EXOC6B, exon 15 of 22)
2115	V2115	0.503644921	11.49167783	3.64E-29	6.08E-29	0.692650619	432	cg21534787	chr19	32464664	32464714	UBA3	Exon (XM_015102335.1/UBA3, exon 2 of 17)
20573	V20573	0.503637987	11.4914852	3.65E-29	6.09E-29	0.672024863	432	cg14186013	chr21	27869168	27869218	PKNOX2	Intron (XM_004019514.2/PKNOX2, intron 2 of 11)
32531	V32531	0.503599579	11.4904181	3.69E-29	6.15E-29	0.666123475	432	cg23649536	chr10	46697148	46697198	DACH1	Intron (XM_012184753.2/DACH1, intron 3 of 11)
34786	V34786	0.503551737	11.48908897	3.74E-29	6.23E-29	0.692662259	432	cg25524961	chr4	16483183	16483233	NXPH1	Intron (XM_004007752.3/NXPH1, intron 2 of 2)
22326	V22326	0.503550068	11.48904261	3.75E-29	6.23E-29	0.681965267	432	cg15515803	chr3	44659930	44659980	WDPCP	Intron (XM_015094321.1/WDPCP, intron 9 of 15)
22357	V22357	0.503535058	11.48862562	3.76E-29	6.25E-29	0.687016948	432	cg15546160	chr15	38750706	38750756	BTBD10	5' UTR
19361	V19361	0.503455024	11.48640242	3.85E-29	6.39E-29	0.682151504	432	cg13234740	chr6	83991207	83991257	YTHDC1	Exon (XM_012180082.2/YTHDC1, exon 14 of 17)
9842	V9842	0.503445733	11.48614433	3.86E-29	6.40E-29	0.681837229	432	cg05638983	chr7	17033876	17033926	LOC106991254	Distal Intergenic
22899	V22899	0.503321169	11.48268465	4.00E-29	6.63E-29	0.679625663	432	cg15974234	chr22	32386045	32386095	TCF7L2	Intron (XM_015103420.1/TCF7L2, intron 3 of 14)
14705	V14705	0.50331309	11.48246028	4.01E-29	6.64E-29	0.655717478	432	cg09487905	chr2	142449496	142449546	SCN1A	Exon (XM_012135111.2/SCN1A, exon 23 of 28)
33289	V33289	0.503285362	11.48169024	4.05E-29	6.69E-29	0.687831735	432	cg24284745	chr22	13245348	13245398	CPEB3	3' UTR
10449	V10449	0.50327296	11.48134582	4.06E-29	6.71E-29	0.701415402	432	cg06132693	chr22	22604019	22604069	CNNM2	Promoter (<=1kb)
28495	V28495	0.503268385	11.48121878	4.07E-29	6.71E-29	0.685946084	432	cg20404157	chr19	49197272	49197322	RAD54L2	5' UTR
7570	V7570	0.50322036	11.47988518	4.12E-29	6.80E-29	0.677251141	432	cg03830740	chr13	29389523	29389573	FAM188A	5' UTR
34227	V34227	0.503198621	11.47928152	4.15E-29	6.84E-29	0.682943011	432	cg25067005	chr2	209320189	209320239	PIKFYVE	Exon (XM_012144293.2/PIKFYVE, exon 13 of 43)
37034	V37034	0.50319157	11.47908575	4.16E-29	6.85E-29	0.675761244	432	cg27311928	chr7	82408810	82408860	LIN52	Intron (XM_004010784.2/LIN52, intron 5 of 5)
36122	V36122	0.503136705	11.47756237	4.23E-29	6.95E-29	0.690799888	432	cg26573499	chr7	29323201	29323251	C7H15orf41	Intron (XM_012181163.2/C7H15orf41, intron 3 of 8)
26628	V26628	0.503131017	11.47740444	4.23E-29	6.96E-29	0.661711984	432	cg18961523	chr2	27918423	27918473	LOC101111349	Exon (XM_015093026.1/LOC101111349, exon 12 of 20)
9528	V9528	0.503102445	11.47661114	4.27E-29	7.01E-29	0.667205978	432	cg05385158	chr14	49931645	49931695	CIC	Exon (XM_012190467.2/CIC, exon 23 of 25)
33384	V33384	0.503076706	11.47589654	4.30E-29	7.06E-29	0.733657696	432	cg24352905	chr7	8594167	8594217	OTP	Promoter (6-7kb)
33459	V33459	0.50299924	11.47374598	4.40E-29	7.21E-29	0.693430487	432	cg24411180	chr5	90355129	90355179	NR2F1	Distal Intergenic
5011	V5011	0.502940015	11.47210198	4.48E-29	7.33E-29	0.690276096	432	cg01810815	chr12	37625904	37625954	DNM3	Intron (XM_015099209.1/DNM3, intron 13 of 21)
21133	V21133	0.502925101	11.471688	4.50E-29	7.35E-29	0.699180557	432	cg14609865	chr2	147255641	147255691	TBR1	5' UTR
17399	V17399	0.502924181	11.47166247	4.50E-29	7.35E-29	0.7321678	432	cg11672180	chr1	38277015	38277065	LOC106990820	Promoter (<=1kb)
15222	V15222	0.502912704	11.47134388	4.51E-29	7.38E-29	0.686434957	432	cg09882598	chr3	183313589	183313639	CAPRIN2	Exon (XM_012175086.2/CAPRIN2, exon 19 of 19)
15284	V15284	0.502889629	11.47070341	4.54E-29	7.42E-29	0.700623894	432	cg09933182	chrX	22136736	22136786	POLA1	Intron (XM_012106423.2/POLA1, intron 35 of 36)
30678	V30678	0.502830533	11.46906321	4.62E-29	7.54E-29	0.685492131	432	cg22152872	chr9	6051295	6051345	ADGRB3	5' UTR
11465	V11465	0.502762059	11.46716291	4.71E-29	7.68E-29	0.642704162	432	cg06893303	chr4	68864085	68864135	HOXA3	Exon (XM_015095103.1/HOXA5, exon 5 of 5)
20052	V20052	0.502699924	11.46543867	4.80E-29	7.81E-29	0.676948505	432	cg13769431	chr2	134726825	134726875	OLA1	Intron (XM_012133444.2/OLA1, intron 4 of 10)
33071	V33071	0.502677847	11.46482606	4.83E-29	7.86E-29	0.689822144	432	cg24096700	chr22	37535140	37535190	FAM204A	Distal Intergenic
17985	V17985	0.502624473	11.46334509	4.91E-29	7.98E-29	0.668253562	432	cg12162688	chr3	195060526	195060576	AEBP2	Exon (XM_015094908.1/AEBP2, exon 6 of 13)
7083	V7083	0.502527447	11.46065321	5.05E-29	8.19E-29	0.681965267	432	cg03455856	chr25	29228127	29228177	PPP3CB	Exon (XM_012105304.2/PPP3CB, exon 8 of 15)
1387	V1387	0.502478346	11.45929108	5.12E-29	8.30E-29	0.679928299	432	cg13872695
31941	V31941	0.502410499	11.45740905	5.22E-29	8.46E-29	0.677646894	432	cg23179251	chr4	53763791	53763841	FOXP2	Intron (XM_012176772.1/FOXP2, intron 17 of 17)
14688	V14688	0.502395139	11.45698301	5.25E-29	8.49E-29	0.671244995	432	cg09472481	chr22	13245720	13245770	CPEB3	3' UTR
26735	V26735	0.502394635	11.45696902	5.25E-29	8.49E-29	0.682745135	432	cg19057807	chr3	45039225	45039275	EHBP1	Intron (XM_004005849.3/EHBP1, intron 21 of 25)
20569	V20569	0.502391886	11.45689277	5.25E-29	8.49E-29	0.673258683	432	cg14182445	chr4	54127917	54127967	FOXP2	Distal Intergenic
27459	V27459	0.502274144	11.4536272	5.43E-29	8.77E-29	0.69517646	432	cg19615848	chr3	132180016	132180066	HOXC6	Promoter (<=1kb)
6962	V6962	0.502247381	11.45288499	5.48E-29	8.83E-29	0.678787597	432	cg03342531	chr5	103630551	103630601	EFNA5	Intron (XM_004009108.2/EFNA5, intron 2 of 4)
18198	V18198	0.502196889	11.4514848	5.56E-29	8.95E-29	0.667147779	432	cg12317253	chrX	22136337	22136387	POLA1	Intron (XM_012106423.2/POLA1, intron 35 of 36)
36155	V36155	0.502122051	11.44940963	5.68E-29	9.14E-29	0.696165844	432	cg26604061	chr6	96727408	96727458	HNRNPDL	3' UTR
35434	V35434	0.502090147	11.44852505	5.73E-29	9.22E-29	0.68428159	432	cg26026354	chr12	74605944	74605994	DENND1B	Intron (XM_012187864.2/DENND1B, intron 11 of 20)
8838	V8838	0.502040969	11.44716158	5.81E-29	9.35E-29	0.66584412	432	cg04840159	chr10	46573456	46573506	DACH1	Intron (XM_012184753.2/DACH1, intron 7 of 11)
33546	V33546	0.502012079	11.44636064	5.86E-29	9.42E-29	0.677879691	432	cg24488657	chr6	83991204	83991254	YTHDC1	Exon (XM_012180082.2/YTHDC1, exon 14 of 17)
25512	V25512	0.501990127	11.44575207	5.90E-29	9.48E-29	0.669242946	432	cg18056194	chr18	48106632	48106682	FBXO33	3' UTR
18292	V18292	0.501985454	11.44562255	5.91E-29	9.48E-29	0.674434305	432	cg12395671	chr6	109674893	109674943	CPEB2	3' UTR
21683	V21683	0.501980603	11.44548804	5.92E-29	9.49E-29	0.665751001	432	cg15012627
27949	V27949	0.501965728	11.4450757	5.94E-29	9.53E-29	0.679718782	432	cg19977232	chr6	68890585	68890635	FIP1L1	Exon (XM_015096503.1/FIP1L1, exon 18 of 18)
24309	V24309	0.501947452	11.44456905	5.97E-29	9.57E-29	0.678752677	432	cg17092784	chr6	91984915	91984965	CNOT6L	Exon (XM_012180234.2/CNOT6L, exon 5 of 11)
25033	V25033	0.501917777	11.44374647	6.03E-29	9.65E-29	0.67280473	432	cg17662386	chrX	43967874	43967924	ARHGEF9	5' UTR
29977	V29977	0.501862638	11.44221809	6.12E-29	9.79E-29	0.671442872	432	cg21590691	chrX	22227671	22227721	POLA1	Intron (XM_012106423.2/POLA1, intron 36 of 36)
27030	V27030	0.501850691	11.44188696	6.14E-29	9.82E-29	0.685119657	432	cg19295318	chr23	55134875	55134925	TCF4	Intron (XM_012103760.2/TCF4, intron 2 of 19)
5101	V5101	0.501818698	11.44100021	6.20E-29	9.89E-29	0.677868051	432	cg01898456	chr6	7099210	7099260	NDST3	Intron (XM_015096357.1/NDST3, intron 6 of 11)
32984	V32984	0.501731849	11.43859327	6.36E-29	1.01E-28	0.672350778	432	cg24025580	chr15	33698274	33698324	GRAMD1B	Exon (XM_012095644.2/GRAMD1B, exon 8 of 22)
14446	V14446	0.501690321	11.43744243	6.44E-29	1.02E-28	0.688599963	432	cg09286326	chr11	20364911	20364961	TAOK1	Exon (XM_004012516.3/TAOK1, exon 10 of 20)
14330	V14330	0.501688642	11.43739591	6.44E-29	1.02E-28	0.677530496	432	cg09192464	chr14	39887947	39887997	ZNF536	Distal Intergenic
34532	V34532	0.501642947	11.43612968	6.53E-29	1.04E-28	0.67409675	432	cg25327462	chr22	21396666	21396716	BTRC	Intron (XM_004020119.3/BTRC, intron 4 of 14)
8722	V8722	0.501623769	11.43559828	6.56E-29	1.04E-28	0.687785176	432	cg04735886	chr1	214340889	214340939	TNIK	3' UTR
13504	V13504	0.501606273	11.4351135	6.60E-29	1.05E-28	0.688425365	432	cg08568054	chr23	19673476	19673526	LOC106991868	Distal Intergenic
35575	V35575	0.501594303	11.43478183	6.62E-29	1.05E-28	0.696910792	432	cg26131826	chr22	21379817	21379867	BTRC	Intron (XM_004020119.3/BTRC, intron 4 of 14)
7586	V7586	0.501594003	11.43477354	6.62E-29	1.05E-28	0.66898687	432	cg03843987	chr2	11272691	11272741	PTBP3	Exon (XM_015092974.1/PTBP3, exon 7 of 14)
24067	V24067	0.501585685	11.43454305	6.64E-29	1.05E-28	0.677623615	432	cg16909474	chr6	87759120	87759170	ANKRD17	3' UTR
27596	V27596	0.501576483	11.4342881	6.65E-29	1.05E-28	0.678857436	432	cg19707231	chr12	78796618	78796668	NAV1	Exon (XM_015099118.1V1, exon 19 of 43)
19132	V19132	0.501569893	11.43410552	6.67E-29	1.05E-28	0.668428159	432	cg13066404	chr23	24185022	24185072	CCDC178	Intron (XM_012103402.2/CCDC178, intron 18 of 20)
30946	V30946	0.501534869	11.43313512	6.73E-29	1.06E-28	0.69196387	432	cg22371751	chr17	18005451	18005501	NAA15	Exon (XM_012097460.2A15, exon 6 of 20)
34935	V34935	0.501521159	11.43275529	6.76E-29	1.07E-28	0.697527703	432	cg25633206	chr8	28976094	28976144	SNX3	Intron (XM_004011226.3/SNX3, intron 1 of 3)
31902	V31902	0.501509291	11.43242651	6.78E-29	1.07E-28	0.679357948	432	cg23145319	chr22	32252378	32252428	TCF7L2	Distal Intergenic
4612	V4612	0.501490088	11.43189449	6.82E-29	1.07E-28	0.675912562	432	cg01502055	chr2	145117021	145117071	FIGN	Distal Intergenic
24398	V24398	0.501489131	11.43186799	6.82E-29	1.07E-28	0.706420523	432	cg17152918	chr2	51407327	51407377	PAX5	5' UTR
6587	V6587	0.501461006	11.43108883	6.88E-29	1.08E-28	0.670360369	432	cg03036119	chr2	156750949	156750999	NEB	Exon (XM_012137607.2/NEB, exon 45 of 161)
32368	V32368	0.501460846	11.43108441	6.88E-29	1.08E-28	0.69260406	432	cg23519325	chr3	37982750	37982800	TIA1	Exon (XM_012167463.2/TIA1, exon 7 of 13)
36045	V36045	0.501422787	11.43003009	6.96E-29	1.09E-28	0.677158022	432	cg26501210	chr1	29128418	29128468	USP24	Intron (XM_015092007.1/USP24, intron 59 of 70)
19031	V19031	0.501325479	11.42733472	7.16E-29	1.12E-28	0.673968712	432	cg12983196	chr12	49079098	49079148	TMEM240	Exon (XM_015099063.1/TMEM240, exon 3 of 8)
24914	V24914	0.501316417	11.42708373	7.17E-29	1.12E-28	0.66392355	432	cg17571655
16518	V16518	0.501310363	11.42691605	7.19E-29	1.12E-28	0.676610951	432	cg10954464	chr1	7468259	7468309	ATG16L1	Exon (XM_015091647.1/ATG16L1, exon 6 of 17)
5006	V5006	0.501308813	11.42687311	7.19E-29	1.12E-28	0.692871776	432	cg01810016	chr18	45482670	45482720	LOC106991744	Exon (LOC106991744/LOC106991744, exon 1 of 1)
32718	V32718	0.501258737	11.42548622	7.30E-29	1.14E-28	0.682593817	432	cg23798080	chr22	31957037	31957087	VTI1A	Intron (XM_012102940.2/VTI1A, intron 4 of 7)
33711	V33711	0.501258375	11.42547619	7.30E-29	1.14E-28	0.68048701	432	cg24620208	chr2	233503017	233503067	ZNF362	Exon (XM_015092848.1/ZNF362, exon 1 of 10)
35293	V35293	0.501246981	11.42516062	7.32E-29	1.14E-28	0.670884161	432	cg25907735	chrX	60790842	60790892	OGT	Intron (XM_004022177.3/OGT, intron 4 of 21)
29835	V29835	0.501220173	11.4244182	7.38E-29	1.15E-28	0.689496229	432	cg21473170	chr11	62038726	62038776	HELZ	Exon (XM_004013156.2/HELZ, exon 12 of 34)
31637	V31637	0.501214581	11.42426335	7.39E-29	1.15E-28	0.671198436	432	cg22948726	chrX	22227525	22227575	POLA1	Intron (XM_012106423.2/POLA1, intron 36 of 36)
34573	V34573	0.501081206	11.42057005	7.68E-29	1.19E-28	0.662037899	432	cg25356922	chr3	216090963	216091013	EP300	Intron (XM_004007010.3/EP300, intron 19 of 32)
8475	V8475	0.501062139	11.42004212	7.72E-29	1.20E-28	0.69517646	432	cg04556535	chr3	45026000	45026050	EHBP1	Intron (XM_004005849.3/EHBP1, intron 21 of 25)
24598	V24598	0.500995953	11.41820965	7.87E-29	1.22E-28	0.685049818	432	cg17318487	chr2	144997755	144997805	FIGN	Distal Intergenic
10260	V10260	0.500933044	11.41646808	8.02E-29	1.24E-28	0.724392402	432	cg05982757	chr3	132175118	132175168	HOXC5	Intron (XM_004006281.3/HOXC5, intron 2 of 2)
15397	V15397	0.500901521	11.41559544	8.09E-29	1.25E-28	0.673340162	432	cg10039119	chr17	15531923	15531973	INPP4B	Exon (XM_012097438.2/INPP4B, exon 26 of 26)
25918	V25918	0.50088213	11.41505865	8.14E-29	1.26E-28	0.683536642	432	cg18385287	chr3	9541954	9542004	MVB12B	Intron (XM_015094187.1/MVB12B, intron 7 of 9)
5936	V5936	0.500856923	11.41436091	8.20E-29	1.27E-28	0.685748207	432	cg02514296	chr2	75938434	75938484	PTPRD	Intron (XM_012125604.1/PTPRD, intron 5 of 32)
19466	V19466	0.500823387	11.41343265	8.28E-29	1.28E-28	0.678671198	432	cg13311046	chr3	213717896	213717946	TMEM184B	Exon (XM_004006989.3/TMEM184B, exon 8 of 8)
3401	V3401	0.500816302	11.41323654	8.29E-29	1.28E-28	0.680999162	432	cg00546281	chr22	21185103	21185153	LOC105604254	Distal Intergenic
21921	V21921	0.500809031	11.4130353	8.31E-29	1.28E-28	0.690893007	432	cg15190612	chr7	72531268	72531318	PPP2R5E	Exon (XM_012181793.2/PPP2R5E, exon 5 of 13)
3506	V3506	0.50078042	11.41224339	8.38E-29	1.29E-28	0.692080268	432	cg00622300	chr2	151548494	151548544	TRNAC-GCA	Distal Intergenic
5019	V5019	0.500761422	11.41171759	8.43E-29	1.30E-28	0.68368796	432	cg01814663	chr2	164408659	164408709	ZEB2	Promoter (9-10kb)
37000	V37000	0.500750376	11.41141188	8.45E-29	1.30E-28	0.675900922	432	cg27282785	chr1	18667292	18667342	ERI3	Intron (XM_012121196.2/ERI3, intron 6 of 7)
43	V43	0.500710325	11.41030343	8.55E-29	1.31E-28	0.686970388	432	cg00431974	chr9	71387379	71387429	ZFPM2	Intron (XM_004011795.3/ZFPM2, intron 4 of 6)
25052	V25052	0.500687185	11.40966307	8.61E-29	1.32E-28	0.681278518	432	cg17676262	chr5	26544899	26544949	ZNF608	Downstream (1-2kb)
19135	V19135	0.500671013	11.40921551	8.65E-29	1.33E-28	0.677099823	432	cg13068696	chr15	50070365	50070415	CLPB	Intron (XM_012096002.1/CLPB, intron 3 of 14)
3076	V3076	0.500661369	11.40894863	8.67E-29	1.33E-28	0.661502468	432	cg00267231	chr3	100322258	100322308	NPAS2	Exon (XM_004006132.3/NPAS2, exon 6 of 20)
15157	V15157	0.500647078	11.40855317	8.71E-29	1.34E-28	0.680789645	432	cg09820740	chr3	63683567	63683617	LOC106991019	Distal Intergenic
33902	V33902	0.500560323	11.40615257	8.93E-29	1.37E-28	0.681639352	432	cg24805210	chr7	21404056	21404106	ACIN1	Intron (XM_004010335.3/ACIN1, intron 9 of 19)
32987	V32987	0.500538817	11.40555753	8.99E-29	1.38E-28	0.685224416	432	cg24028289	chr10	69620578	69620628	LOC105616207	Distal Intergenic
22175	V22175	0.500535206	11.40545763	9.00E-29	1.38E-28	0.686155601	432	cg15385778	chr1	69428325	69428375	MTF2	5' UTR
34518	V34518	0.500524142	11.40515149	9.02E-29	1.38E-28	0.667927647	432	cg25320313	chr1	177579927	177579977	LOC105602007	Intron (XR_001020604.2/LOC105602007, intron 5 of 6)
6432	V6432	0.500487568	11.40413959	9.12E-29	1.39E-28	0.692918335	432	cg02911028	chr1	215669138	215669188	MECOM	Intron (XM_012099727.1/MECOM, intron 1 of 15)
25389	V25389	0.500431103	11.40257746	9.27E-29	1.41E-28	0.668451439	432	cg17950628	chr18	43066922	43066972	NPAS3	Intron (XM_015101805.1/NPAS3, intron 5 of 15)
25743	V25743	0.500394771	11.40157239	9.37E-29	1.43E-28	0.674178229	432	cg18254159	chr2	52004606	52004656	RNF38	3' UTR
36527	V36527	0.500390451	11.40145288	9.38E-29	1.43E-28	0.687831735	432	cg26917764	chr3	10322905	10322955	MAPKAP1	Intron (XM_012159507.2/MAPKAP1, intron 5 of 12)
2394	V2394	0.500352815	11.40041179	9.48E-29	1.44E-28	0.702334947	432	cg24446586	chr4	68820629	68820679	HOXA11	5' UTR
19823	V19823	0.500342368	11.40012281	9.51E-29	1.45E-28	0.672688332	432	cg13592245	chr17	7330436	7330486	LRBA	Intron (XM_015101368.1/LRBA, intron 51 of 56)
8219	V8219	0.500337441	11.39998652	9.53E-29	1.45E-28	0.67985846	432	cg04349239	chrX	120977351	120977401	RBM41	Exon (XM_012107600.2/RBM41, exon 6 of 6)
2578	V2578	0.500317372	11.39943138	9.58E-29	1.46E-28	0.678834156	432	cg26214460	chr6	98601902	98601952	NKX6-1	Distal Intergenic
5460	V5460	0.500291206	11.39870763	9.65E-29	1.47E-28	0.677181302	432	cg02148584	chr6	43301755	43301805	PPARGC1A	Intron (XM_015096413.1/PPARGC1A, intron 1 of 12)
9485	V9485	0.500254885	11.39770305	9.75E-29	1.48E-28	0.668404879	432	cg05348516	chr4	92767043	92767093	CALU	Exon (XM_004008045.2/CALU, exon 3 of 7)
21859	V21859	0.500243499	11.39738814	9.79E-29	1.48E-28	0.688716361	432	cg15156295	chr1	273800815	273800865	LOC105605081	Distal Intergenic
1030	V1030	0.500227219	11.39693789	9.83E-29	1.49E-28	0.676843747	432	cg10289234
11052	V11052	0.500215082	11.39660222	9.87E-29	1.49E-28	0.685177856	432	cg06600309	chr8	56705603	56705653	MED23	Intron (XM_004011322.3/MED23, intron 11 of 29)
15258	V15258	0.500211082	11.39649159	9.88E-29	1.50E-28	0.688378806	432	cg09912328	chr2	134796341	134796391	OLA1	Intron (XM_012133444.2/OLA1, intron 7 of 10)
26325	V26325	0.500195388	11.39605756	9.92E-29	1.50E-28	0.689926902	432	cg18722124	chr14	40085420	40085470	ZNF536	Intron (XM_015100543.1/ZNF536, intron 4 of 9)
2556	V2556	0.500180423	11.39564368	9.97E-29	1.51E-28	0.696026166	432	cg26077120	chr11	39467291	39467341	LOC105610166	Exon (LOC105610166/LOC105610166, exon 1 of 1)
33039	V33039	0.500179039	11.39560542	9.97E-29	1.51E-28	0.674178229	432	cg24075638	chr1	90118393	90118443	RSBN1	Intron (XM_012178899.2/RSBN1, intron 3 of 7)
19745	V19745	0.500145437	11.39467615	1.01E-28	1.52E-28	0.67664587	432	cg13522984	chr4	53928975	53929025	FOXP2	Intron (XM_012176772.1/FOXP2, intron 1 of 17)
8151	V8151	0.500138389	11.39448126	1.01E-28	1.52E-28	0.664063227	432	cg04296683	chrX	113164582	113164632	LRCH2	Exon (XM_015105079.1/LRCH2, exon 22 of 24)
34341	V34341	0.500098687	11.39338338	1.02E-28	1.54E-28	0.692010429	432	cg25160217	chr13	50544784	50544834	PANK2	Promoter (<=1kb)
35413	V35413	0.500035701	11.39164175	1.04E-28	1.57E-28	0.6875291	432	cg26011651	chr10	36676979	36677029	CENPJ	Exon (XM_015098210.1/CENPJ, exon 9 of 18)
12350	V12350	0.500032393	11.39155027	1.04E-28	1.57E-28	0.672781451	432	cg07607664	chr3	40584299	40584349	ETAA1	Distal Intergenic
8741	V8741	0.500013916	11.39103941	1.05E-28	1.57E-28	0.669813297	432	cg04757109	chr12	58284665	58284715	RALGPS2	Exon (XM_015099335.1/RALGPS2, exon 15 of 20)
28074	V28074	0.500011191	11.39096406	1.05E-28	1.57E-28	0.664237825	432	cg20083425	chr25	30539172	30539222	KAT6B	Exon (XM_015104456.1/KAT6B, exon 8 of 18)
6193	V6193	0.499963875	11.38965588	1.06E-28	1.59E-28	0.697865257	432	cg02707087	chr3	10475716	10475766	MAPKAP1	Intron (XM_012159507.2/MAPKAP1, intron 10 of 12)
12170	V12170	0.499885106	11.38747824	1.09E-28	1.63E-28	0.677239501	432	cg07443727	chr1	204464465	204464515	TTC14	Exon (XM_012098470.1/TTC14, exon 10 of 11)
14972	V14972	0.499882037	11.38739339	1.09E-28	1.63E-28	0.678310364	432	cg09672745	chr4	46712133	46712183	ATXN7L1	Exon (XM_012176688.1/ATXN7L1, exon 10 of 13)
6609	V6609	0.499863785	11.38688885	1.09E-28	1.64E-28	0.67856644	432	cg03058520	chr18	32923907	32923957	CLK3	Exon (XM_015101988.1/CLK3, exon 3 of 12)
15848	V15848	0.499850527	11.38652235	1.10E-28	1.64E-28	0.693069653	432	cg10428646	chr5	55051674	55051724	TCERG1	Exon (XM_012179294.1/TCERG1, exon 6 of 22)
3375	V3375	0.499846674	11.38641582	1.10E-28	1.65E-28	0.673863954	432	cg00522519	chr16	8732332	8732382	TNPO1	Exon (XM_004016897.3/TNPO1, exon 24 of 25)
9521	V9521	0.499838408	11.38618735	1.10E-28	1.65E-28	0.697993295	432	cg05378162	chr2	51572904	51572954	PAX5	Intron (XM_012120994.2/PAX5, intron 8 of 8)
34102	V34102	0.499804969	11.38526303	1.11E-28	1.66E-28	0.68113884	432	cg24967006	chr10	26440085	26440135	NBEA	Exon (XM_012184587.1/NBEA, exon 18 of 51)
26571	V26571	0.499800447	11.38513803	1.11E-28	1.66E-28	0.710378061	432	cg18913399	chr6	17225468	17225518	LEF1	Intron (XM_004009633.3/LEF1, intron 3 of 11)
31630	V31630	0.499793216	11.38493815	1.11E-28	1.67E-28	0.708271254	432	cg22942788	chr15	60659875	60659925	PAX6	Intron (XM_012096162.1/PAX6, intron 6 of 11)
18688	V18688	0.499723346	11.38300698	1.14E-28	1.70E-28	0.686900549	432	cg12732278	chr7	14351355	14351405	MAP2K5	Exon (XM_004010259.3/MAP2K5, exon 19 of 22)
33760	V33760	0.499688738	11.38205047	1.15E-28	1.72E-28	0.685073098	432	cg24665462	chrX	22165218	22165268	POLA1	Intron (XM_012106423.2/POLA1, intron 35 of 36)
29565	V29565	0.499678885	11.38177817	1.15E-28	1.72E-28	0.66771813	432	cg21250241	chr1	273529273	273529323	LOC105605081	Distal Intergenic
8797	V8797	0.499637051	11.38062204	1.17E-28	1.74E-28	0.703114815	432	cg04808014	chr11	39467303	39467353	LOC105610166	Exon (LOC105610166/LOC105610166, exon 1 of 1)
16734	V16734	0.499600901	11.37962307	1.18E-28	1.75E-28	0.678729398	432	cg11127743	chr14	33716176	33716226	DYNC1LI2	Exon (XM_004015048.2/DYNC1LI2, exon 13 of 13)
12235	V12235	0.49957884	11.37901343	1.19E-28	1.76E-28	0.679579104	432	cg07504030	chr5	44876342	44876392	SMAD5	Exon (XM_012178533.1/SMAD5, exon 2 of 7)
25723	V25723	0.49956798	11.37871335	1.19E-28	1.77E-28	0.68179067	432	cg18238089	chr3	37981965	37982015	TIA1	Intron (XM_012167463.2/TIA1, intron 6 of 12)
23917	V23917	0.499539762	11.37793362	1.20E-28	1.78E-28	0.665902319	432	cg16779048	chr5	25267003	25267053	LOC105608683	Distal Intergenic
1327	V1327	0.499539418	11.37792411	1.20E-28	1.78E-28	0.685375733	432	cg13067886
15441	V15441	0.499512922	11.377192	1.21E-28	1.79E-28	0.712717665	432	cg10082575	chr18	42948397	42948447	NPAS3	Intron (XM_015101805.1/NPAS3, intron 4 of 15)
369	V369	0.499504934	11.3769713	1.21E-28	1.80E-28	0.678031008	432	cg03708116	chr14	47281924	47281974	SPRED3	Exon (XM_015100562.1/SPRED3, exon 2 of 6)
26740	V26740	0.499500032	11.37683583	1.21E-28	1.80E-28	0.666740386	432	cg19065012	chr6	53911525	53911575	TRNAC-GCA	Promoter (7-8kb)
34056	V34056	0.499448284	11.37540608	1.23E-28	1.82E-28	0.685794767	432	cg24935223	chr15	35666916	35666966	SOX6	Intron (XM_015100742.1/SOX6, intron 6 of 18)
36953	V36953	0.499408009	11.37429337	1.25E-28	1.84E-28	0.698912841	432	cg27244752	chr3	10216282	10216332	PBX3	Intron (XM_012162805.2/PBX3, intron 4 of 10)
26086	V26086	0.499333096	11.37222388	1.27E-28	1.88E-28	0.675016296	432	cg18511505	chr2	242422362	242422412	HNRNPR	Distal Intergenic
35400	V35400	0.499314177	11.37170127	1.28E-28	1.89E-28	0.700449297	432	cg25999088	chr4	102656002	102656052	LOC101105324	5' UTR
30958	V30958	0.499295172	11.3711763	1.29E-28	1.90E-28	0.673584598	432	cg22377555	chr3	63214998	63215048	BCL11A	Intron (XM_012170922.2/BCL11A, intron 2 of 5)
11407	V11407	0.499282188	11.37081764	1.29E-28	1.90E-28	0.681231958	432	cg06845220	chr16	4871384	4871434	CREBRF	3' UTR
13558	V13558	0.499237948	11.36959568	1.31E-28	1.93E-28	0.700135022	432	cg08608749
27087	V27087	0.499230258	11.36938327	1.31E-28	1.93E-28	0.694198715	432	cg19337633	chr14	34797656	34797706	NFATC3	Exon (XM_004015086.3/NFATC3, exon 2 of 11)
26880	V26880	0.499162945	11.36752416	1.34E-28	1.97E-28	0.670791042	432	cg19173326	chr4	8752279	8752329	LOC105614943	Distal Intergenic
16990	V16990	0.49906531	11.36482787	1.37E-28	2.02E-28	0.672699972	432	cg11323349	chr23	25516014	25516064	TRAPPC8	Exon (XM_012103423.2/TRAPPC8, exon 8 of 29)
19833	V19833	0.499059562	11.36466915	1.38E-28	2.02E-28	0.683839277	432	cg13604976	chr1	69428263	69428313	MTF2	Intron (XM_004002200.3/MTF2, intron 1 of 12)
10286	V10286	0.499020636	11.36359427	1.39E-28	2.04E-28	0.667450414	432	cg06001140	chr12	17958065	17958115	USH2A	Downstream (2-3kb)
27697	V27697	0.499020189	11.36358193	1.39E-28	2.04E-28	0.676564391	432	cg19783477	chr1	69451160	69451210	MTF2	Exon (XM_004002200.3/MTF2, exon 12 of 13)
34749	V34749	0.498921285	11.36085112	1.43E-28	2.10E-28	0.682943011	432	cg25496747	chr22	8292949	8292999	A1CF	Exon (XM_012102459.2/A1CF, exon 8 of 11)
13601	V13601	0.498901775	11.36031246	1.44E-28	2.11E-28	0.680987522	432	cg08636454	chr22	36305271	36305321	SHTN1	Distal Intergenic
15653	V15653	0.498892714	11.36006231	1.44E-28	2.12E-28	0.691370239	432	cg10248578	chr1	273033996	273034046	SATB1	Distal Intergenic
24417	V24417	0.498868806	11.35940228	1.45E-28	2.13E-28	0.69007822	432	cg17170619	chr12	31976457	31976507	CEP170	Promoter (<=1kb)
18141	V18141	0.49886205	11.35921577	1.46E-28	2.13E-28	0.657672968	432	cg12280932	chr11	19702293	19702343	SUPT6H	Exon (XM_004012503.3/SUPT6H, exon 11 of 38)
16532	V16532	0.498856419	11.3590603	1.46E-28	2.13E-28	0.701112767	432	cg10967140	chr24	3123095	3123145	CREBBP	Exon (XM_015104056.1/CREBBP, exon 4 of 34)
29388	V29388	0.498855229	11.35902746	1.46E-28	2.13E-28	0.675726325	432	cg21132526	chr1	273333021	273333071	SATB1	Intron (XM_015092727.1/SATB1, intron 8 of 9)
12823	V12823	0.498730651	11.35558859	1.51E-28	2.21E-28	0.673596238	432	cg07998596	chr19	17093885	17093935	SETD5	Exon (XM_015102308.1/SETD5, exon 7 of 24)
12145	V12145	0.498675825	11.35407532	1.54E-28	2.24E-28	0.672327498	432	cg07425611	chr23	18159466	18159516	LOC105604416	Distal Intergenic
259	V259	0.498665702	11.35379593	1.54E-28	2.24E-28	0.678799236	432	cg02649349	chr1	204146251	204146301	FXR1	Exon (XM_012098342.2/FXR1, exon 14 of 17)
36713	V36713	0.498654038	11.35347403	1.55E-28	2.25E-28	0.662503492	432	cg27050612	chr11	37928480	37928530	NFE2L1	Intron (XM_015098735.1/NFE2L1, intron 2 of 6)
2857	V2857	0.498638656	11.3530495	1.55E-28	2.26E-28	0.683711239	432	cg00101175	chr14	35978126	35978176	NFAT5	5' UTR
11761	V11761	0.498626262	11.35270745	1.56E-28	2.27E-28	0.686784151	432	cg07115423	chr6	23712726	23712776	PPP3CA	Exon (XM_015096395.1/PPP3CA, exon 4 of 13)
21643	V21643	0.498596775	11.35189367	1.57E-28	2.28E-28	0.685108018	432	cg14987417	chr1	46648389	46648439	NEGR1	3' UTR
32449	V32449	0.498564083	11.3509915	1.59E-28	2.30E-28	0.660897197	432	cg23589620	chr4	25210886	25210936	BZW2	Intron (XM_004007770.3/BZW2, intron 1 of 11)
22871	V22871	0.498482266	11.34873381	1.63E-28	2.35E-28	0.672315858	432	cg15950887	chr14	35966153	35966203	NFAT5	Promoter (<=1kb)
29400	V29400	0.498467875	11.34833672	1.63E-28	2.36E-28	0.671105317	432	cg21143166	chr9	82001870	82001920	INTS8	Exon (XM_012184111.2/INTS8, exon 8 of 27)
33936	V33936	0.498398343	11.34641825	1.67E-28	2.41E-28	0.668009126	432	cg24833372	chr3	95700382	95700432	TET3	3' UTR
5334	V5334	0.498366254	11.34553294	1.68E-28	2.43E-28	0.680556849	432	cg02057523	chr1	26907059	26907109	ZYG11B	Exon (XM_012145294.2/ZYG11B, exon 3 of 14)
14056	V14056	0.498362566	11.34543121	1.68E-28	2.43E-28	0.668800633	432	cg08986529	chr2	220364625	220364675	LOC101117564	3' UTR
29714	V29714	0.498320395	11.34426781	1.70E-28	2.46E-28	0.685352454	432	cg21371528	chr26	35411964	35412014	KAT6A	Exon (XM_015104631.1/KAT6A, exon 1 of 21)
9914	V9914	0.498285336	11.34330066	1.72E-28	2.48E-28	0.681918708	432	cg05704605	chr13	75243654	75243704	ZMYND8	Exon (XM_015099511.1/ZMYND8, exon 17 of 26)
25003	V25003	0.498243783	11.34215442	1.74E-28	2.50E-28	0.668695875	432	cg17642487	chr1	114506175	114506225	PBX1	Intron (XM_012185380.2/PBX1, intron 2 of 9)
31503	V31503	0.498239536	11.34203728	1.74E-28	2.51E-28	0.668090604	432	cg22825789	chrX	60791489	60791539	OGT	Intron (XM_004022177.3/OGT, intron 4 of 21)
7824	V7824	0.498212005	11.34127788	1.76E-28	2.52E-28	0.678391843	432	cg04036118	chr12	53261350	53261400	RC3H1	3' UTR
21758	V21758	0.498208613	11.34118431	1.76E-28	2.53E-28	0.682454139	432	cg15061730	chr23	50790250	50790300	MEX3C	Exon (XM_015103552.1/MEX3C, exon 10 of 10)
23051	V23051	0.498171946	11.34017297	1.78E-28	2.55E-28	0.672909489	432	cg16098283	chr2	152850966	152851016	NR4A2	Distal Intergenic
27510	V27510	0.498143963	11.33940116	1.79E-28	2.57E-28	0.66010569	432	cg19646346	chr3	58166091	58166141	LOC101107266	Exon (XM_015094352.1/LOC101107266, exon 4 of 4)
25098	V25098	0.49803746	11.33646397	1.85E-28	2.64E-28	0.685154577	432	cg17714851	chr3	178761430	178761480	RBFOX2	Exon (XR_001434413.1/RBFOX2, exon 6 of 12)
13283	V13283	0.498030878	11.33628246	1.85E-28	2.65E-28	0.67217618	432	cg08383062	chr3	117120921	117120971	PPFIA2	Exon (XM_012174010.2/PPFIA2, exon 7 of 29)
14513	V14513	0.498011215	11.33574022	1.86E-28	2.66E-28	0.685852966	432	cg09343813	chr9	71387398	71387448	ZFPM2	Intron (XM_004011795.3/ZFPM2, intron 4 of 6)
36608	V36608	0.49797943	11.33486374	1.88E-28	2.68E-28	0.671512711	432	cg26975329
5536	V5536	0.497963461	11.33442342	1.89E-28	2.69E-28	0.711320886	432	cg02203207	chr3	125503460	125503510	POC1B	Exon (XM_004006245.2/POC1B, exon 12 of 12)
13858	V13858	0.497955935	11.33421589	1.89E-28	2.70E-28	0.689135394	432	cg08841430	chrX	37872808	37872858	MED14	Exon (XM_015104695.1/MED14, exon 27 of 33)
33577	V33577	0.497917713	11.33316203	1.91E-28	2.73E-28	0.679695502	432	cg24511235	chr18	41892764	41892814	AKAP6	Intron (XM_004017884.2/AKAP6, intron 7 of 13)
11800	V11800	0.497874903	11.33198168	1.93E-28	2.76E-28	0.721156532	432	cg07149402	chr15	60667470	60667520	PAX6	Intron (XM_012096162.1/PAX6, intron 2 of 11)
20754	V20754	0.497869635	11.33183644	1.94E-28	2.76E-28	0.682279542	432	cg14333067	chr11	17522882	17522932	RHOT1	Exon (XM_015098512.1/RHOT1, exon 18 of 19)
3547	V3547	0.497832508	11.33081287	1.96E-28	2.79E-28	0.694303473	432	cg00665868	chr7	8915926	8915976	LOC105615610	Intron (XR_001434882.1/LOC105615610, intron 1 of 2)
29623	V29623	0.497798027	11.32986226	1.98E-28	2.81E-28	0.683967315	432	cg21302471	chr3	84914586	84914636	SOS1	Exon (XM_015094424.1/SOS1, exon 6 of 23)
29779	V29779	0.497792816	11.32971861	1.98E-28	2.82E-28	0.696875873	432	cg21420628	chr2	164468721	164468771	ZEB2	Intron (XM_012138277.2/ZEB2, intron 7 of 14)
12043	V12043	0.497775407	11.32923869	1.99E-28	2.83E-28	0.73980352	432	cg07339555
30865	V30865	0.497725318	11.32785794	2.02E-28	2.87E-28	0.680533569	432	cg22307154	chr3	46650543	46650593	USP34	Exon (XM_015094329.1/USP34, exon 73 of 79)
3311	V3311	0.497704932	11.32729601	2.03E-28	2.88E-28	0.651981097	432	cg00470694	chr5	91487325	91487375	MCTP1	Intron (XM_012178961.1/MCTP1, intron 13 of 23)
29975	V29975	0.497701671	11.32720612	2.03E-28	2.88E-28	0.673398361	432	cg21589847	chr2	36801363	36801413	CNTFR	Intron (XM_015093062.1/CNTFR, intron 2 of 9)
4260	V4260	0.497696613	11.3270667	2.04E-28	2.89E-28	0.654704814	432	cg01229752	chr14	37607783	37607833	ZFHX3	Exon (XM_015100188.1/ZFHX3, exon 13 of 15)
18944	V18944	0.497685848	11.32676996	2.04E-28	2.89E-28	0.679567464	432	cg12929402	chr15	60506331	60506381	ELP4	Intron (XM_004016368.3/ELP4, intron 7 of 9)
20329	V20329	0.497579857	11.32384865	2.11E-28	2.98E-28	0.665483285	432	cg13991371	chr3	197706256	197706306	LOC105613112	Distal Intergenic
28326	V28326	0.497572212	11.32363797	2.11E-28	2.99E-28	0.667528023	432	cg20276424	chr3	215352694	215352744	TNRC6B	Exon (XM_012175680.2/TNRC6B, exon 8 of 25)
1948	V1948	0.497564987	11.32343885	2.11E-28	2.99E-28	0.673538039	432	cg19863209	chr16	4841651	4841701	CREBRF	Intron (XM_004016872.2/CREBRF, intron 2 of 8)
8026	V8026	0.497559404	11.323285	2.12E-28	2.99E-28	0.657486731	432	cg04193717	chr14	29877527	29877577	LOC101102924	Distal Intergenic
23773	V23773	0.497544675	11.32287906	2.13E-28	3.00E-28	0.680265853	432	cg16682215	chr8	61234744	61234794	BCLAF1	3' UTR
30833	V30833	0.497526986	11.32239159	2.14E-28	3.02E-28	0.673305243	432	cg22276147	chr21	23935040	23935090	LOC105604025	Promoter (<=1kb)
9111	V9111	0.497449782	11.32026412	2.19E-28	3.08E-28	0.688518484	432	cg05079374	chr15	36123784	36123834	LOC105602230	Distal Intergenic
9354	V9354	0.497419178	11.31942084	2.20E-28	3.11E-28	0.68556197	432	cg05247547	chrX	42038990	42039040	KDM6A	Exon (XM_015104862.1/KDM6A, exon 28 of 31)
4080	V4080	0.497419165	11.31942048	2.20E-28	3.11E-28	0.680265853	432	cg01079453
30597	V30597	0.497301013	11.31616518	2.28E-28	3.21E-28	0.661281311	432	cg22073073	chr25	15644749	15644799	ANK3	Exon (XM_012105105.2/ANK3, exon 3 of 25)
11117	V11117	0.497297015	11.31605502	2.28E-28	3.21E-28	0.688634882	432	cg06642440	chr11	8425041	8425091	DYNLL2	Intron (XM_004012391.3/DYNLL2, intron 2 of 2)
15649	V15649	0.497238411	11.31444058	2.32E-28	3.26E-28	0.663958469	432	cg10247007	chr11	39521875	39521925	PPP1R1B	Promoter (5-6kb)
15958	V15958	0.497193893	11.31321425	2.35E-28	3.30E-28	0.666263153	432	cg10509379	chr3	197899951	197900001	LMO3	Intron (XM_015094915.1/LMO3, intron 3 of 4)
15933	V15933	0.497157932	11.31222372	2.38E-28	3.34E-28	0.672129621	432	cg10492151	chr19	1690185	1690235	SLC4A7	Exon (XM_012099292.2/SLC4A7, exon 18 of 26)
3234	V3234	0.497140876	11.31175392	2.39E-28	3.35E-28	0.676215197	432	cg00405803	chr5	85460392	85460442	LOC101105819	Distal Intergenic
4662	V4662	0.497131663	11.31150016	2.39E-28	3.36E-28	0.674038551	432	cg01534197	chr12	44394023	44394073	CAMTA1	Intron (XM_012187375.1/CAMTA1, intron 3 of 23)
6456	V6456	0.497126475	11.31135726	2.40E-28	3.36E-28	0.667031381	432	cg02933226	chr23	20035885	20035935	CELF4	Intron (XM_015103584.1/CELF4, intron 9 of 9)
22007	V22007	0.497087216	11.31027597	2.42E-28	3.40E-28	0.678298724	432	cg15257945	chr2	244723842	244723892	EIF4G3	3' UTR
19545	V19545	0.497048821	11.30921852	2.45E-28	3.43E-28	0.677227861	432	cg13371970	chr22	32524291	32524341	TCF7L2	Intron (XM_015103420.1/TCF7L2, intron 5 of 14)
36299	V36299	0.497006955	11.30806555	2.48E-28	3.47E-28	0.659523699	432	cg26713204	chr2	152684604	152684654	NR4A2	Distal Intergenic
17336	V17336	0.496986578	11.30750439	2.49E-28	3.49E-28	0.6785548	432	cg11622231
19432	V19432	0.496927302	11.30587208	2.54E-28	3.54E-28	0.647488127	432	cg13290565	chrX	30761569	30761619	DMD	Promoter (<=1kb)
5007	V5007	0.496914761	11.30552676	2.55E-28	3.56E-28	0.682652016	432	cg01810127	chr1	177463615	177463665	ZBTB20	Distal Intergenic
35341	V35341	0.496912449	11.3054631	2.55E-28	3.56E-28	0.675796164	432	cg25946066	chr5	46728545	46728595	FAM13B	Exon (XM_012178550.1/FAM13B, exon 16 of 26)
12643	V12643	0.496874893	11.304429	2.58E-28	3.59E-28	0.675831083	432	cg07853606	chr14	9863372	9863422	MBTPS1	Exon (XM_004014937.3/MBTPS1, exon 3 of 23)
21060	V21060	0.49682798	11.30313733	2.61E-28	3.64E-28	0.665774281	432	cg14548925	chr4	46959598	46959648	ATXN7L1	Promoter (<=1kb)
27507	V27507	0.496825933	11.30308096	2.61E-28	3.64E-28	0.688087811	432	cg19643902	chr9	39142786	39142836	CHD7	Exon (XM_015097778.1/CHD7, exon 9 of 41)
33722	V33722	0.496811827	11.30269259	2.62E-28	3.65E-28	0.691207282	432	cg24633967	chr5	43618136	43618186	C5H5orf24	3' UTR
35219	V35219	0.49677983	11.30181167	2.65E-28	3.68E-28	0.673817395	432	cg25848520	chr15	61407326	61407376	EIF3M	Intron (XM_004016379.2/EIF3M, intron 8 of 10)
755	V755	0.496676956	11.29897967	2.73E-28	3.79E-28	0.682663656	432	cg07392883	chr14	25710898	25710948	CNOT1	5' UTR
5021	V5021	0.496670391	11.29879895	2.73E-28	3.80E-28	0.672362417	432	cg01818075	chr3	63287177	63287227	BCL11A	Exon (XM_012170922.2/BCL11A, exon 4 of 6)
23636	V23636	0.496666693	11.29869716	2.73E-28	3.80E-28	0.688599963	432	cg16573711	chr15	38796802	38796852	BTBD10	Intron (XM_012095724.1/BTBD10, intron 8 of 9)
7936	V7936	0.496584444	11.29643325	2.80E-28	3.89E-28	0.681662632	432	cg04118365	chr3	192298625	192298675	C2CD5	Exon (XM_004006785.3/C2CD5, exon 24 of 27)
33701	V33701	0.496579363	11.29629338	2.80E-28	3.89E-28	0.668835553	432	cg24613152	chr5	22102109	22102159	ADAMTS19	Intron (XM_012178168.2/ADAMTS19, intron 9 of 27)
30621	V30621	0.496568977	11.29600754	2.81E-28	3.90E-28	0.698819723	432	cg22097793	chr5	28256611	28256661	SNX24	Intron (XM_012178225.1/SNX24, intron 3 of 6)
5931	V5931	0.49654865	11.29544809	2.83E-28	3.92E-28	0.701333923	432	cg02508649	chr7	8893580	8893630	LOC105615610	Distal Intergenic
15298	V15298	0.496524294	11.29477776	2.85E-28	3.94E-28	0.664400782	432	cg09954563	chrX	48608065	48608115	WNK3	Exon (XM_012106629.2/WNK3, exon 18 of 23)
23746	V23746	0.496493362	11.29392648	2.87E-28	3.97E-28	0.702393146	432	cg16665024	chr1	140862808	140862858	SAMSN1	Intron (XM_004002825.3/SAMSN1, intron 2 of 8)
5888	V5888	0.496488372	11.29378915	2.88E-28	3.98E-28	0.692871776	432	cg02480299	chr25	32462393	32462443	KCNMA1	Intron (NM_001303455.1/KCNMA1, intron 18 of 25)
25647	V25647	0.496351664	11.29002727	2.99E-28	4.13E-28	0.677635255	432	cg18176337	chr10	76264826	76264876	PCCA	Intron (XM_015098256.1/PCCA, intron 14 of 23)
37053	V37053	0.496335571	11.28958446	3.00E-28	4.14E-28	0.663993389	432	cg27334722
29656	V29656	0.496283138	11.28814183	3.05E-28	4.20E-28	0.670104293	432	cg21327742	chr15	74648890	74648940	AMBRA1	Exon (XM_015101147.1/AMBRA1, exon 7 of 20)
31824	V31824	0.496270915	11.28780555	3.06E-28	4.21E-28	0.685666729	432	cg23091169	chr23	30992684	30992734	SS18	Exon (XM_012103456.2/SS18, exon 8 of 11)
35900	V35900	0.496235797	11.2868394	3.09E-28	4.25E-28	0.683117609	432	cg26376143	chr13	32265430	32265480	EPC1	3' UTR
19718	V19718	0.496234295	11.28679806	3.09E-28	4.25E-28	0.671326474	432	cg13505192	chr3	135315548	135315598	DIP2B	Exon (XM_012174302.1/DIP2B, exon 5 of 38)
1485	V1485	0.496196748	11.28576515	3.13E-28	4.29E-28	0.672315858	432	cg14905969	chr5	50242844	50242894	PCDH1	Exon (XM_015096110.1/PCDH1, exon 6 of 6)
35212	V35212	0.496163844	11.28486	3.16E-28	4.33E-28	0.695374337	432	cg25841906	chr1	227016765	227016815	RSRC1	Intron (XM_012100645.2/RSRC1, intron 6 of 9)
19154	V19154	0.496022582	11.28097447	3.28E-28	4.50E-28	0.686586274	432	cg13081277	chr22	32251684	32251734	VTI1A	3' UTR
23413	V23413	0.495921275	11.27818835	3.38E-28	4.63E-28	0.685759847	432	cg16388915	chr4	96517480	96517530	CHCHD3	Intron (XM_012176231.2/CHCHD3, intron 6 of 8)
849	V849	0.495858736	11.27646865	3.44E-28	4.70E-28	0.683839277	432	cg08294161	chr23	50700518	50700568	SMAD4	Exon (NM_001267886.1/SMAD4, exon 7 of 12)
28333	V28333	0.495800084	11.27485592	3.50E-28	4.78E-28	0.679299749	432	cg20280919	chr17	61918856	61918906	MAPKAPK5	Exon (XM_004017408.3/MAPKAPK5, exon 5 of 14)
18368	V18368	0.495793025	11.27466185	3.51E-28	4.79E-28	0.650235124	432	cg12457066	chr7	44004578	44004628	TPM1	Exon (XM_015096682.1/TPM1, exon 8 of 9)
20153	V20153	0.495769927	11.27402678	3.53E-28	4.82E-28	0.682477419	432	cg13852712	chr19	43342236	43342286	SLMAP	3' UTR
11535	V11535	0.495750497	11.27349256	3.55E-28	4.84E-28	0.674178229	432	cg06942745	chr6	43178864	43178914	PPARGC1A	Exon (XM_012179735.2/PPARGC1A, exon 8 of 13)
4374	V4374	0.49574366	11.27330458	3.56E-28	4.84E-28	0.688728001	432	cg01326399	chr1	227149375	227149425	RSRC1	Intron (XM_012100645.2/RSRC1, intron 5 of 9)
36563	V36563	0.495739116	11.27317967	3.56E-28	4.85E-28	0.669126548	432	cg26934556	chr1	69825230	69825280	FNBP1L	Intron (XM_012176510.2/FNBP1L, intron 10 of 15)
12518	V12518	0.495703655	11.27220476	3.60E-28	4.89E-28	0.691009405	432	cg07744439	chr24	29851543	29851593	LOC105604757	Distal Intergenic
2428	V2428	0.495695984	11.27199387	3.60E-28	4.90E-28	0.680417171	432	cg24702760	chr8	48104418	48104468	SRSF12	Exon (XM_012182791.2/SRSF12, exon 2 of 5)
695	V695	0.495625418	11.27005399	3.68E-28	4.99E-28	0.685317534	432	cg06765617	chr9	42454333	42454383	ARMC1	Distal Intergenic
33612	V33612	0.495612663	11.26970338	3.69E-28	5.01E-28	0.696992271	432	cg24539487	chr5	47959038	47959088	PAIP2	Exon (XM_012178592.1/PAIP2, exon 2 of 4)
13319	V13319	0.495534489	11.26755459	3.77E-28	5.12E-28	0.675575007	432	cg08415410	chr24	7907641	7907691	C24H16orf72	Intron (XM_015104074.1/C24H16orf72, intron 4 of 4)
17810	V17810	0.495509545	11.26686899	3.80E-28	5.15E-28	0.680196015	432	cg12012124	chr24	22229157	22229207	RBBP6	Exon (XM_004020845.3/RBBP6, exon 7 of 17)
28079	V28079	0.495491365	11.26636933	3.82E-28	5.18E-28	0.680801285	432	cg20086673	chr16	37197146	37197196	NIPBL	Intron (XM_004017042.3/NIPBL, intron 7 of 46)
3890	V3890	0.495485609	11.26621113	3.83E-28	5.18E-28	0.689077195	432	cg00920973	chr7	8967079	8967129	AP3B1	Intron (XM_012180683.2/AP3B1, intron 22 of 26)
20390	V20390	0.495447275	11.2651576	3.87E-28	5.23E-28	0.683711239	432	cg14032310	chr5	79397626	79397676	ATG10	Intron (XM_012178918.2/ATG10, intron 5 of 7)
29072	V29072	0.495440261	11.26496484	3.88E-28	5.24E-28	0.687098426	432	cg20870434	chr3	156699364	156699414	MON2	Exon (XM_012174633.1/MON2, exon 27 of 32)
32403	V32403	0.495365303	11.26290492	3.96E-28	5.35E-28	0.694012478	432	cg23551268	chr24	30057611	30057661	LOC105604757	Distal Intergenic
5567	V5567	0.495338598	11.26217109	3.99E-28	5.38E-28	0.678903995	432	cg02225097	chr14	40431780	40431830	LOC105606393	Distal Intergenic
11171	V11171	0.495284669	11.26068925	4.05E-28	5.46E-28	0.678112487	432	cg06678857	chr6	69545876	69545926	GSX2	Distal Intergenic
11996	V11996	0.49524006	11.25946357	4.10E-28	5.53E-28	0.655182047	432	cg07291847	chr2	155824496	155824546	FMNL2	Intron (XM_012137115.1/FMNL2, intron 23 of 23)
4274	V4274	0.495162925	11.2573444	4.19E-28	5.65E-28	0.670779402	432	cg01240843	chr18	46347855	46347905	MIPOL1	Intron (XM_015101770.1/MIPOL1, intron 5 of 13)
15667	V15667	0.495095227	11.25548467	4.28E-28	5.75E-28	0.678124127	432	cg10259539	chr22	32547397	32547447	TCF7L2	Intron (XM_015103420.1/TCF7L2, intron 6 of 14)
33811	V33811	0.49506789	11.25473373	4.31E-28	5.79E-28	0.671675668	432	cg24719193	chr1	9915192	9915242	SFPQ	3' UTR
36430	V36430	0.495005789	11.25302797	4.39E-28	5.89E-28	0.694070677	432	cg26820958	chr4	103793527	103793577	BRAF	Intron (XM_004008111.2/BRAF, intron 14 of 17)
35376	V35376	0.494989453	11.25257926	4.41E-28	5.92E-28	0.695269578	432	cg25973323	chr25	30535306	30535356	KAT6B	Exon (XM_015104456.1/KAT6B, exon 7 of 18)
5087	V5087	0.494961611	11.25181457	4.44E-28	5.96E-28	0.672304218	432	cg01879724	chr2	145144404	145144454	FIGN	Distal Intergenic
36634	V36634	0.494864685	11.24915268	4.57E-28	6.12E-28	0.659290902	432	cg26991209	chr23	19496298	19496348	LOC106991868	Distal Intergenic
6207	V6207	0.494857979	11.24896852	4.57E-28	6.13E-28	0.66772977	432	cg02715589	chr1	88942573	88942623	WNT2B	Distal Intergenic
21414	V21414	0.494843946	11.24858315	4.59E-28	6.15E-28	0.676541112	432	cg14815794	chr2	39151513	39151563	PPP2R2A	Intron (XM_004004173.3/PPP2R2A, intron 3 of 9)
1784	V1784	0.494832419	11.24826661	4.61E-28	6.16E-28	0.705582456	432	cg18093372	chr2	183123070	183123120	EN1	Promoter (<=1kb)
9869	V9869	0.494788212	11.24705271	4.67E-28	6.24E-28	0.679730422	432	cg05661289	chr6	58748547	58748597	UBE2K	Exon (XM_012180482.2/UBE2K, exon 6 of 7)
34225	V34225	0.494774214	11.24666836	4.68E-28	6.26E-28	0.670651364	432	cg25065244	chr20	16327587	16327637	UBR2	Exon (XM_012100674.2/UBR2, exon 12 of 48)
34231	V34231	0.494738936	11.24569969	4.73E-28	6.32E-28	0.690834808	432	cg25069285	chr13	69263504	69263554	TOP1	3' UTR
207	V207	0.494735834	11.24561452	4.74E-28	6.32E-28	0.678345284	432	cg02159819	chr6	83975535	83975585	YTHDC1	Exon (XM_012180082.2/YTHDC1, exon 6 of 17)
25946	V25946	0.494712419	11.24497162	4.77E-28	6.36E-28	0.666565788	432	cg18409232	chr13	22131521	22131571	DNAJC1	Intron (XM_004014216.3/DNAJC1, intron 3 of 11)
5588	V5588	0.494694544	11.24448085	4.79E-28	6.39E-28	0.665262129	432	cg02237910	chr1	24441232	24441282	ELAVL4	3' UTR
22978	V22978	0.494671112	11.24383753	4.82E-28	6.43E-28	0.66772977	432	cg16032864	chr6	93561645	93561695	NAA11	Distal Intergenic
31168	V31168	0.49466202	11.24358792	4.84E-28	6.44E-28	0.694338393	432	cg22548438	chr2	183123151	183123201	EN1	Promoter (<=1kb)
33988	V33988	0.494600973	11.24191199	4.92E-28	6.54E-28	0.667985846	432	cg24873842	chr1	66541372	66541422	ZNF326	Exon (XM_015092093.1/ZNF326, exon 5 of 12)
34807	V34807	0.494591353	11.24164791	4.93E-28	6.56E-28	0.682512338	432	cg25539758	chr15	61806634	61806684	CSTF3	Exon (XM_004016384.3/CSTF3, exon 18 of 21)
12514	V12514	0.494569781	11.24105573	4.96E-28	6.59E-28	0.690369215	432	cg07741383	chr10	15138708	15138758	LOC101102822	Exon (XM_015097968.1/LOC101102822, exon 5 of 6)
26998	V26998	0.494560373	11.24079745	4.98E-28	6.61E-28	0.687598938	432	cg19269615	chr19	29989044	29989094	EIF4E3	Distal Intergenic
33753	V33753	0.494537628	11.24017311	5.01E-28	6.65E-28	0.677565416	432	cg24662750	chr2	51444461	51444511	PAX5	Intron (XM_012120994.2/PAX5, intron 4 of 8)
34770	V34770	0.494531408	11.24000236	5.02E-28	6.66E-28	0.695048422	432	cg25511621	chr20	6587056	6587106	MLIP	Distal Intergenic
18279	V18279	0.494509122	11.23939063	5.05E-28	6.69E-28	0.693290809	432	cg12387075	chr2	165273372	165273422	ARHGAP15	Intron (XM_004004720.3/ARHGAP15, intron 12 of 13)
30916	V30916	0.494496189	11.23903564	5.07E-28	6.72E-28	0.672956048	432	cg22351690	chr14	35972764	35972814	NFAT5	Intron (XM_015100522.1/NFAT5, intron 2 of 12)
37041	V37041	0.494491441	11.23890532	5.08E-28	6.72E-28	0.680521929	432	cg27317479	chr15	25160806	25160856	CADM1	Intron (XM_004016040.3/CADM1, intron 8 of 9)
9113	V9113	0.49445194	11.23782114	5.13E-28	6.79E-28	0.69516482	432	cg05081037	chr2	164521218	164521268	ZEB2	3' UTR
29672	V29672	0.49444858	11.23772891	5.14E-28	6.80E-28	0.685690008	432	cg21337763
35841	V35841	0.494427511	11.23715063	5.17E-28	6.83E-28	0.686015923	432	cg26334230	chr6	96662294	96662344	HNRNPD	Intron (XM_015096581.1/HNRNPD, intron 8 of 8)
18582	V18582	0.494347697	11.2349602	5.29E-28	6.98E-28	0.68175575	432	cg12631819	chr16	35406859	35406909	RICTOR	Exon (XM_004017028.3/RICTOR, exon 28 of 38)
3726	V3726	0.494344012	11.23485908	5.29E-28	6.99E-28	0.671733867	432	cg00797540	chr23	3419743	3419793	ZADH2	Promoter (9-10kb)
26705	V26705	0.494317809	11.23413999	5.33E-28	7.04E-28	0.687447621	432	cg19026055	chr9	83900396	83900446	LOC106991354	Exon (XR_001435152.1/LOC106991354, exon 2 of 2)
25231	V25231	0.494299446	11.2336361	5.36E-28	7.07E-28	0.647150573	432	cg17830621	chr5	43099803	43099853	TCF7	3' UTR
20614	V20614	0.494269524	11.23281503	5.40E-28	7.12E-28	0.675284012	432	cg14222444	chr5	54921505	54921555	POU4F3	Promoter (7-8kb)
14015	V14015	0.494242592	11.23207602	5.45E-28	7.17E-28	0.675551727	432	cg08956303	chr15	74089351	74089401	PHF21A	Exon (XM_012096319.2/PHF21A, exon 16 of 20)
20755	V20755	0.494175304	11.23022977	5.55E-28	7.30E-28	0.699320235	432	cg14333389	chr22	32252455	32252505	TCF7L2	Distal Intergenic
22330	V22330	0.494117763	11.22865109	5.64E-28	7.41E-28	0.688017972	432	cg15517596	chr3	74129645	74129695	NRXN1	Intron (XM_015094031.1/NRXN1, intron 20 of 22)
21655	V21655	0.494113239	11.22852697	5.65E-28	7.41E-28	0.683478443	432	cg14992303	chr6	91995312	91995362	CNOT6L	Exon (XM_012180234.2/CNOT6L, exon 4 of 11)
24043	V24043	0.494112501	11.22850671	5.65E-28	7.41E-28	0.68174411	432	cg16888434	chr2	198648611	198648661	SF3B1	Exon (XM_012141371.2/SF3B1, exon 10 of 23)
2916	V2916	0.494066466	11.22724381	5.72E-28	7.50E-28	0.692976534	432	cg00146174	chr3	46642732	46642782	USP34	Exon (XM_015094329.1/USP34, exon 67 of 79)
30547	V30547	0.494043865	11.2266238	5.76E-28	7.55E-28	0.648861626	432	cg22029056	chrX	38479265	38479315	DDX3X	3' UTR
17044	V17044	0.494008599	11.22565641	5.82E-28	7.62E-28	0.696759475	432	cg11381542	chr2	136604672	136604722	DLX1	Distal Intergenic
25072	V25072	0.493957104	11.22424392	5.90E-28	7.72E-28	0.684700624	432	cg17695612	chr7	62621409	62621459	DDHD1	Exon (XM_015097079.1/DDHD1, exon 12 of 18)
37161	V37161	0.493886211	11.22229948	6.02E-28	7.87E-28	0.670953999	432	cg27416592	chr3	66001920	66001970	LOC101111446	Distal Intergenic
13585	V13585	0.493886038	11.22229476	6.02E-28	7.87E-28	0.667380575	432	cg08628894	chr3	93021938	93021988	ZNF638	Exon (XM_012173609.2/ZNF638, exon 2 of 29)
30273	V30273	0.493884256	11.22224588	6.03E-28	7.87E-28	0.681325077	432	cg21811232	chr11	35381055	35381105	TOB1	3' UTR
22147	V22147	0.493878151	11.22207844	6.04E-28	7.88E-28	0.670686284	432	cg15363953	chr12	40955780	40955830	CASZ1	Promoter (8-9kb)
17159	V17159	0.493842553	11.22110215	6.10E-28	7.95E-28	0.693081292	432	cg11464376	chr7	9093029	9093079	AP3B1	Intron (XM_012180683.2/AP3B1, intron 6 of 26)
27634	V27634	0.493819061	11.22045788	6.14E-28	7.99E-28	0.684467828	432	cg19732321	chr1	214336348	214336398	TNIK	Exon (XM_012099241.2/TNIK, exon 32 of 33)
14324	V14324	0.493816365	11.22038395	6.14E-28	8.00E-28	0.665867399	432	cg09189709	chr3	12741897	12741947	RC3H2	3' UTR
34059	V34059	0.493774355	11.21923192	6.22E-28	8.08E-28	0.680987522	432	cg24937065	chr7	29323209	29323259	C7H15orf41	Intron (XM_012181163.2/C7H15orf41, intron 3 of 8)
2784	V2784	0.493742453	11.21835711	6.27E-28	8.15E-28	0.698575286	432	cg00046033
34540	V34540	0.493710992	11.21749443	6.33E-28	8.21E-28	0.702986777	432	cg25334215	chr15	61854263	61854313	CSTF3	Exon (XM_004016384.3/CSTF3, exon 3 of 21)
27938	V27938	0.493684065	11.21675609	6.38E-28	8.27E-28	0.664587019	432	cg19971619	chr3	211003883	211003933	KDM5A	Exon (XM_015094999.1/KDM5A, exon 20 of 28)
14338	V14338	0.493653365	11.21591433	6.43E-28	8.34E-28	0.675214173	432	cg09200783	chr7	65883771	65883821	TMEM260	Intron (XM_004010675.3/TMEM260, intron 4 of 16)
4911	V4911	0.493578428	11.21385982	6.57E-28	8.50E-28	0.671640749	432	cg01732872	chr2	199555063	199555113	LOC106990596	Distal Intergenic
11548	V11548	0.493518433	11.2122151	6.68E-28	8.64E-28	0.678484961	432	cg06951357	chrX	42011367	42011417	KDM6A	Exon (XM_015104862.1/KDM6A, exon 18 of 31)
19261	V19261	0.493516265	11.21215566	6.69E-28	8.64E-28	0.695572213	432	cg13160087	chr8	38373101	38373151	LOC105615867	Distal Intergenic
3008	V3008	0.493472448	11.21095452	6.77E-28	8.75E-28	0.659255983	432	cg00213533	chrX	18124749	18124799	LOC101105138	Distal Intergenic
6860	V6860	0.493467187	11.21081033	6.78E-28	8.76E-28	0.691265481	432	cg03257834	chr12	31774903	31774953	SDCCAG8	Intron (XM_004013657.3/SDCCAG8, intron 14 of 17)
12323	V12323	0.493417118	11.2094379	6.88E-28	8.87E-28	0.685201136	432	cg07588875	chr3	42794193	42794243	SPRED2	Exon (XM_012168209.1/SPRED2, exon 2 of 7)
23497	V23497	0.493392266	11.20875672	6.93E-28	8.93E-28	0.691032685	432	cg16461475	chr7	14707022	14707072	PIAS1	Exon (XM_015096836.1/PIAS1, exon 2 of 14)
35077	V35077	0.493370023	11.20814708	6.97E-28	8.98E-28	0.658313158	432	cg25729868	chr10	46697483	46697533	DACH1	Intron (XM_012184753.2/DACH1, intron 3 of 11)
18336	V18336	0.493288006	11.2058993	7.13E-28	9.18E-28	0.690962846	432	cg12433841	chr15	28600088	28600138	KMT2A	Promoter (<=1kb)
27436	V27436	0.493276838	11.20559324	7.16E-28	9.21E-28	0.672478816	432	cg19600714	chr15	63869003	63869053	SLC1A2	Intron (XM_012096233.2/SLC1A2, intron 10 of 10)
25042	V25042	0.49326009	11.20513427	7.19E-28	9.25E-28	0.673945433	432	cg17669262	chr3	147809535	147809585	KIF21A	Exon (XM_004006453.3/KIF21A, exon 29 of 38)
9477	V9477	0.493249837	11.2048533	7.21E-28	9.27E-28	0.685108018	432	cg05339934	chr1	203386891	203386941	SOX2	Distal Intergenic
21214	V21214	0.493130795	11.20159137	7.46E-28	9.56E-28	0.682116584	432	cg14664922	chr15	40260004	40260054	USP47	Exon (XM_012095768.2/USP47, exon 24 of 28)
31928	V31928	0.4931163	11.20119421	7.49E-28	9.59E-28	0.681953627	432	cg23167410	chr10	75895419	75895469	CLYBL	Intron (XM_012184910.1/CLYBL, intron 3 of 7)
9287	V9287	0.493087296	11.20039957	7.55E-28	9.66E-28	0.673654437	432	cg05198893	chr25	7914217	7914267	RBM34	Promoter (4-5kb)
11427	V11427	0.493069934	11.19992388	7.59E-28	9.71E-28	0.659977652	432	cg06864501	chr6	98216196	98216246	TRNAS-GGA	Distal Intergenic
36548	V36548	0.493067809	11.19986566	7.59E-28	9.71E-28	0.665657882	432	cg26928850	chr7	42798123	42798173	CSNK1G1	Exon (XM_012181366.2/CSNK1G1, exon 4 of 12)
33536	V33536	0.493053019	11.19946046	7.62E-28	9.74E-28	0.666623987	432	cg24479895	chr21	43886708	43886758	RBM4B	3' UTR
23801	V23801	0.493044092	11.19921589	7.64E-28	9.76E-28	0.699215476	432	cg16699500	chr7	8667473	8667523	TBCA	Intron (XM_015096795.1/TBCA, intron 1 of 3)
29801	V29801	0.493042415	11.19916995	7.65E-28	9.76E-28	0.670011174	432	cg21445170	chr17	24802512	24802562	PCDH10	Distal Intergenic
5757	V5757	0.493022134	11.19861435	7.69E-28	9.81E-28	0.709004563	432	cg02368037	chr20	35807115	35807165	CDKAL1	Intron (XM_015102823.1/CDKAL1, intron 8 of 13)
22914	V22914	0.492995369	11.19788111	7.75E-28	9.87E-28	0.672502095	432	cg15983398	chr2	165122067	165122117	LOC101123186	Distal Intergenic
36785	V36785	0.492982874	11.19753883	7.77E-28	9.90E-28	0.659698296	432	cg27113680	chr2	200579603	200579653	SATB2	Intron (XM_012141769.2/SATB2, intron 9 of 10)
8436	V8436	0.492977127	11.1973814	7.79E-28	9.91E-28	0.687692057	432	cg04525811	chr2	137562705	137562755	TLK1	Intron (XM_015093364.1/TLK1, intron 12 of 20)
20829	V20829	0.492932449	11.19615753	7.89E-28	1.00E-27	0.67155927	432	cg14391592	chr14	43404460	43404510	KCTD15	Promoter (3-4kb)
34058	V34058	0.492907871	11.19548427	7.94E-28	1.01E-27	0.689647546	432	cg24937063	chr1	25973816	25973866	NRDC	Exon (XM_004001969.3/NRDC, exon 9 of 31)
14488	V14488	0.492884607	11.19484705	7.99E-28	1.02E-27	0.680847844	432	cg09320415	chr2	237371249	237371299	EPB41	Exon (XM_012150396.2/EPB41, exon 9 of 22)
15663	V15663	0.492877579	11.19465455	8.01E-28	1.02E-27	0.685690008	432	cg10257214	chr10	73818860	73818910	MBNL2	Intron (XM_015098006.1/MBNL2, intron 5 of 9)
29316	V29316	0.492875732	11.19460397	8.01E-28	1.02E-27	0.689938542	432	cg21081239	chr15	25961844	25961894	TRNAC-GCA	Distal Intergenic
24987	V24987	0.492851363	11.19393649	8.07E-28	1.02E-27	0.67471366	432	cg17634341	chr9	74555300	74555350	UBR5	Exon (XM_015097892.1/UBR5, exon 9 of 59)
23920	V23920	0.492828745	11.19331703	8.12E-28	1.03E-27	0.69067185	432	cg16782576	chr2	51146038	51146088	ZCCHC7	Intron (XM_015093142.1/ZCCHC7, intron 6 of 8)
28978	V28978	0.492821198	11.19311033	8.14E-28	1.03E-27	0.67732098	432	cg20781048	chr23	16840607	16840657	LOC101106384	Distal Intergenic
17368	V17368	0.492815019	11.1929411	8.15E-28	1.03E-27	0.691358599	432	cg11643979	chr2	164468773	164468823	ZEB2	Intron (XM_012138277.2/ZEB2, intron 7 of 14)
12167	V12167	0.492800448	11.19254201	8.19E-28	1.04E-27	0.68301285	432	cg07442866	chr1	215150157	215150207	PHC3	Intron (XM_012099500.2/PHC3, intron 13 of 14)
26950	V26950	0.492769744	11.19170113	8.26E-28	1.04E-27	0.713427693	432	cg19238264	chr23	54764183	54764233	TCF4	3' UTR
11869	V11869	0.492734492	11.19073572	8.34E-28	1.05E-27	0.681034081	432	cg07210941	chr9	71852513	71852563	ZFPM2	Distal Intergenic
37146	V37146	0.492704238	11.18990723	8.41E-28	1.06E-27	0.705093584	432	cg27405041	chr7	29708719	29708769	MEIS2	Intron (XM_012181166.1/MEIS2, intron 8 of 12)
7666	V7666	0.492680331	11.18925255	8.47E-28	1.07E-27	0.682361021	432	cg03905612	chr5	89508792	89508842	LOC101121262	Distal Intergenic
13347	V13347	0.492679583	11.18923209	8.47E-28	1.07E-27	0.712473228	432	cg08436831	chr18	45603071	45603121	LOC101105284	Distal Intergenic
2581	V2581	0.492641757	11.18819631	8.56E-28	1.08E-27	0.684421268	432	cg26234118	chr15	75428643	75428693	CELF1	Exon (XM_015101159.1/CELF1, exon 5 of 13)
37024	V37024	0.492632422	11.1879407	8.58E-28	1.08E-27	0.673747556	432	cg27306684	chr5	47159944	47159994	EGR1	Downstream (1-2kb)
30518	V30518	0.492613899	11.18743352	8.63E-28	1.09E-27	0.692906695	432	cg22008756	chr4	46728084	46728134	ATXN7L1	Intron (XM_012176688.1/ATXN7L1, intron 6 of 12)
24828	V24828	0.492587859	11.18672053	8.69E-28	1.09E-27	0.695025142	432	cg17506882	chr14	6595179	6595229	LOC105609364	Intron (XR_001044935.2/LOC105609364, intron 1 of 4)
4416	V4416	0.492579234	11.18648437	8.71E-28	1.10E-27	0.674015271	432	cg01352953	chr24	7908169	7908219	C24H16orf72	3' UTR
16153	V16153	0.492565019	11.18609517	8.75E-28	1.10E-27	0.664924574	432	cg10652918	chr3	78659189	78659239	SRBD1	Intron (XM_004005979.2/SRBD1, intron 16 of 20)
34448	V34448	0.492549892	11.18568103	8.78E-28	1.10E-27	0.676971785	432	cg25259085	chr25	24795605	24795655	CCAR1	Intron (XM_012105193.2/CCAR1, intron 10 of 24)
31976	V31976	0.492504934	11.18445015	8.90E-28	1.12E-27	0.682919732	432	cg23200795	chr24	30261205	30261255	LOC101106855	Downstream (<1kb)
36495	V36495	0.492483209	11.18385539	8.95E-28	1.12E-27	0.665064252	432	cg26885075	chr5	85361302	85361352	LOC101105819	Distal Intergenic
1705	V1705	0.492455044	11.18308436	9.02E-28	1.13E-27	0.678252165	432	cg17269514	chr18	32923956	32924006	CLK3	Exon (XM_015101988.1/CLK3, exon 3 of 12)
3007	V3007	0.492447513	11.1828782	9.04E-28	1.13E-27	0.662375454	432	cg00211803
14417	V14417	0.492361456	11.18052252	9.26E-28	1.16E-27	0.667136139	432	cg09262631	chr3	100322265	100322315	NPAS2	Exon (XM_004006132.3/NPAS2, exon 6 of 20)
27680	V27680	0.49234151	11.17997658	9.31E-28	1.16E-27	0.674527423	432	cg19770439	chr11	19875171	19875221	PHF12	Exon (XM_012185409.1/PHF12, exon 8 of 14)
25082	V25082	0.492334755	11.17979169	9.33E-28	1.17E-27	0.680184375	432	cg17704721	chr1	226960999	226961049	RSRC1	Intron (XM_012100645.2/RSRC1, intron 7 of 9)
11386	V11386	0.492323165	11.17947444	9.36E-28	1.17E-27	0.67410839	432	cg06829904	chrX	58758647	58758697	PJA1	Distal Intergenic
13362	V13362	0.492296497	11.17874454	9.43E-28	1.18E-27	0.675516808	432	cg08448599	chr24	30004443	30004493	LOC105604757	Distal Intergenic
33150	V33150	0.492291204	11.17859967	9.45E-28	1.18E-27	0.666880063	432	cg24173251
26199	V26199	0.492279898	11.17829024	9.48E-28	1.18E-27	0.675912562	432	cg18619851	chr1	100425774	100425824	CELF3	Exon (XM_015091687.1/CELF3, exon 2 of 13)
36712	V36712	0.492267214	11.1779431	9.51E-28	1.19E-27	0.680649967	432	cg27050569	chr1	20477163	20477213	PIK3R3	Intron (XM_004001927.3/PIK3R3, intron 1 of 9)
36163	V36163	0.492218106	11.17659913	9.64E-28	1.20E-27	0.66582084	432	cg26609986	chr4	52714183	52714233	TFEC	Distal Intergenic
30348	V30348	0.492138602	11.17442346	9.86E-28	1.23E-27	0.659255983	432	cg21858349	chrX	77382548	77382598	MECP2	3' UTR
29155	V29155	0.492133327	11.17427912	9.88E-28	1.23E-27	0.686469876	432	cg20947400	chr14	41061272	41061322	TSHZ3	Distal Intergenic
32206	V32206	0.492077752	11.17275842	1.00E-27	1.25E-27	0.686528075	432	cg23393094	chr3	10126975	10127025	PBX3	Intron (XM_012162805.2/PBX3, intron 4 of 10)
31223	V31223	0.492054757	11.17212925	1.01E-27	1.25E-27	0.687214824	432	cg22597345	chr7	13988426	13988476	IQCH	Intron (XM_012180817.2/IQCH, intron 11 of 22)
14061	V14061	0.492036273	11.17162353	1.01E-27	1.26E-27	0.673235404	432	cg08988723	chr1	90101590	90101640	RSBN1	Exon (XM_012178899.2/RSBN1, exon 5 of 8)
28979	V28979	0.492016895	11.17109334	1.02E-27	1.27E-27	0.67856644	432	cg20781076
5552	V5552	0.491996699	11.17054078	1.03E-27	1.27E-27	0.683932396	432	cg02211077	chr26	32076420	32076470	WHSC1L1	Exon (XM_012105932.1/WHSC1L1, exon 14 of 23)
2320	V2320	0.491978973	11.17005583	1.03E-27	1.28E-27	0.662689729	432	cg23641297	chr2	147415439	147415489	LOC106990956	Intron (XR_001434109.1/LOC106990956, intron 1 of 1)
4736	V4736	0.491977049	11.1700032	1.03E-27	1.28E-27	0.683455163	432	cg01594275	chr3	216090830	216090880	EP300	Intron (XM_004007010.3/EP300, intron 19 of 32)
17941	V17941	0.491931369	11.1687535	1.05E-27	1.29E-27	0.670127572	432	cg12126599	chr10	46204681	46204731	LOC105616179	Distal Intergenic
29115	V29115	0.491912948	11.16824958	1.05E-27	1.30E-27	0.722239035	432	cg20914508	chr1	178468041	178468091	GAP43	Promoter (<=1kb)
12312	V12312	0.49187604	11.16723994	1.06E-27	1.31E-27	0.65372707	432	cg07582800	chr3	190495942	190495992	SOX5	Intron (XM_015094048.1/SOX5, intron 5 of 20)
29807	V29807	0.491869037	11.16704836	1.06E-27	1.31E-27	0.70660676	432	cg21450314	chr13	76678168	76678218	CSE1L	Exon (XM_004014624.3/CSE1L, exon 16 of 25)
24151	V24151	0.491850599	11.16654402	1.07E-27	1.32E-27	0.675900922	432	cg16972496	chr15	13954741	13954791	FAM76B	Exon (XM_004015986.3/FAM76B, exon 4 of 10)
7098	V7098	0.491846461	11.16643083	1.07E-27	1.32E-27	0.665343607	432	cg03466412	chr19	11956335	11956385	SCN5A	Exon (XM_015102253.1/SCN5A, exon 17 of 30)
29308	V29308	0.49177873	11.16457821	1.09E-27	1.35E-27	0.67919499	432	cg21074294	chr2	164414000	164414050	ZEB2	Promoter (3-4kb)
27331	V27331	0.491693367	11.16224356	1.12E-27	1.38E-27	0.681860508	432	cg19528122	chr12	49696441	49696491	SPEN	Intron (XM_015099297.1/SPEN, intron 2 of 17)
32275	V32275	0.491684607	11.162004	1.12E-27	1.38E-27	0.666251513	432	cg23446296	chr10	45646904	45646954	KLHL1	Distal Intergenic
32632	V32632	0.491606542	11.15986919	1.15E-27	1.41E-27	0.675295651	432	cg23728569	chr16	37097646	37097696	NIPBL	3' UTR
17585	V17585	0.49155419	11.15843768	1.16E-27	1.43E-27	0.677344259	432	cg11829296	chr4	30295997	30296047	SP4	3' UTR
20442	V20442	0.491514506	11.1573526	1.18E-27	1.44E-27	0.68816929	432	cg14079717	chr5	28064515	28064565	PRDM6	Exon (XM_015095668.1/PRDM6, exon 7 of 10)
19180	V19180	0.491473754	11.15623841	1.19E-27	1.46E-27	0.682721855	432	cg13098892	chr22	22960055	22960105	PCGF6	Exon (XM_004020155.3/PCGF6, exon 8 of 10)
13350	V13350	0.491431496	11.15508307	1.20E-27	1.48E-27	0.680358972	432	cg08438560	chrX	42011389	42011439	KDM6A	Exon (XM_015104862.1/KDM6A, exon 18 of 31)
651	V651	0.491413353	11.15458709	1.21E-27	1.48E-27	0.666193314	432	cg06330379	chrX	113674940	113674990	LOC101108550	Exon (XM_015105081.1/LOC101108550, exon 3 of 3)
14171	V14171	0.491319562	11.15202316	1.24E-27	1.52E-27	0.683897476	432	cg09075948	chr25	33771986	33772036	LOC105605020	Distal Intergenic
4132	V4132	0.491302323	11.15155193	1.25E-27	1.53E-27	0.688972437	432	cg01118512	chr4	53402417	53402467	MDFIC	Distal Intergenic
23050	V23050	0.491243349	11.14993998	1.27E-27	1.55E-27	0.708632089	432	cg16097670	chr2	228098377	228098427	IRS1	Promoter (<=1kb)
32415	V32415	0.491238456	11.14980623	1.27E-27	1.55E-27	0.677833132	432	cg23561549	chr3	34116165	34116215	CAD	Exon (XM_015094267.1/CAD, exon 14 of 40)
13311	V13311	0.491232906	11.14965455	1.27E-27	1.55E-27	0.711320886	432	cg08406509	chr4	68763639	68763689	EVX1	Promoter (<=1kb)
15069	V15069	0.491217567	11.1492353	1.28E-27	1.56E-27	0.680196015	432	cg09747157	chr3	10065333	10065383	PBX3	Exon (XM_012162805.2/PBX3, exon 5 of 11)
16401	V16401	0.491212562	11.14909851	1.28E-27	1.56E-27	0.712717665	432	cg10861899	chr2	132900222	132900272	HOXD10	Exon (XM_004004565.2/HOXD10, exon 2 of 2)
4220	V4220	0.491198481	11.14871366	1.28E-27	1.57E-27	0.689507869	432	cg01194316
33957	V33957	0.491197975	11.14869983	1.28E-27	1.57E-27	0.691800913	432	cg24853943	chr3	18047136	18047186	KIDINS220	Intron (XM_015094209.1/KIDINS220, intron 24 of 31)
14126	V14126	0.491191683	11.14852787	1.29E-27	1.57E-27	0.653785269	432	cg09040561	chrX	45507962	45508012	ZC3H12B	Exon (XM_004022034.3/ZC3H12B, exon 7 of 7)
6100	V6100	0.491163835	11.14776678	1.30E-27	1.58E-27	0.674969736	432	cg02632559	chr12	70126513	70126563	RCOR3	Exon (XM_012187793.1/RCOR3, exon 9 of 10)
1132	V1132	0.491115233	11.14643856	1.31E-27	1.60E-27	0.691568116	432	cg11275974	chr3	132179824	132179874	HOXC6	Promoter (<=1kb)
6099	V6099	0.491080811	11.14549791	1.33E-27	1.61E-27	0.687121706	432	cg02632558	chr9	52675270	52675320	ZFHX4	Intron (XM_012183892.2/ZFHX4, intron 4 of 10)
28570	V28570	0.491075438	11.14535108	1.33E-27	1.62E-27	0.671489431	432	cg20453574	chr16	13476931	13476981	SREK1	5' UTR
37080	V37080	0.491065683	11.14508451	1.33E-27	1.62E-27	0.685038179	432	cg27357895	chr14	21837190	21837240	FTO	Intron (NM_001104931.1/FTO, intron 8 of 8)
16241	V16241	0.491060795	11.14495093	1.33E-27	1.62E-27	0.691090884	432	cg10722512	chr1	233314105	233314155	MBNL1	3' UTR
19275	V19275	0.491039583	11.14437133	1.34E-27	1.63E-27	0.68940311	432	cg13166660	chr1	117532730	117532780	POU2F1	3' UTR
37200	V37200	0.491035349	11.14425563	1.34E-27	1.63E-27	0.66648431	432	cg27454350	chr1	177755309	177755359	LOC105602007	Intron (XR_001020604.2/LOC105602007, intron 4 of 6)
21503	V21503	0.491028874	11.1440787	1.35E-27	1.63E-27	0.679462706	432	cg14884696	chr11	38360355	38360405	NPEPPS	Exon (XM_012185997.2/NPEPPS, exon 9 of 23)
21871	V21871	0.490954215	11.14203876	1.38E-27	1.67E-27	0.705466058	432	cg15160939	chr15	50618015	50618065	FCHSD2	Exon (XM_004016298.3/FCHSD2, exon 5 of 20)
30515	V30515	0.490950395	11.14193439	1.38E-27	1.67E-27	0.674585622	432	cg22007471	chr12	44341856	44341906	CAMTA1	Exon (XM_012187375.1/CAMTA1, exon 4 of 24)
28444	V28444	0.490931403	11.1414155	1.38E-27	1.68E-27	0.682279542	432	cg20371748	chrX	49426915	49426965	HUWE1	3' UTR
21308	V21308	0.490896602	11.14046471	1.40E-27	1.69E-27	0.671291554	432	cg14728138	chr7	47034548	47034598	TRNAC-GCA	Promoter (7-8kb)
35522	V35522	0.490894392	11.14040435	1.40E-27	1.69E-27	0.6568931	432	cg26092669	chr7	20651652	20651702	PCK2	Exon (XM_015096868.1/PCK2, exon 5 of 10)
22219	V22219	0.490796623	11.13773347	1.44E-27	1.74E-27	0.686725952	432	cg15428926	chr2	84351368	84351418	BNC2	Intron (XM_015093230.1/BNC2, intron 2 of 3)
36085	V36085	0.490759832	11.13672848	1.45E-27	1.75E-27	0.669568861	432	cg26536257	chr1	249625337	249625387	LOC105604262	Distal Intergenic
13844	V13844	0.49073258	11.13598411	1.46E-27	1.77E-27	0.663946829	432	cg08826760	chr2	134709400	134709450	OLA1	Intron (XM_012133444.2/OLA1, intron 4 of 10)
11953	V11953	0.490713174	11.13545406	1.47E-27	1.78E-27	0.674282987	432	cg07266476	chr19	30804194	30804244	FOXP1	Distal Intergenic
36042	V36042	0.49069333	11.13491206	1.48E-27	1.78E-27	0.690427414	432	cg26499416	chr23	32854251	32854301	TTC39C	Intron (XM_015103624.1/TTC39C, intron 5 of 13)
19691	V19691	0.490681442	11.13458737	1.48E-27	1.79E-27	0.688204209	432	cg13484596	chr1	177733195	177733245	LOC105602007	Intron (XR_001020604.2/LOC105602007, intron 4 of 6)
13542	V13542	0.490677698	11.13448511	1.49E-27	1.79E-27	0.698796443	432	cg08594046	chr1	66543395	66543445	ZNF326	Intron (XM_015092093.1/ZNF326, intron 5 of 11)
25079	V25079	0.490655214	11.13387102	1.50E-27	1.80E-27	0.690869727	432	cg17702669	chr22	23017528	23017578	TAF5	Exon (XM_004020157.3/TAF5, exon 3 of 11)
9460	V9460	0.49065001	11.13372889	1.50E-27	1.80E-27	0.683734519	432	cg05325167	chr2	241165071	241165121	SRRM1	Intron (XM_015093684.1/SRRM1, intron 8 of 18)
12613	V12613	0.490643469	11.13355026	1.50E-27	1.81E-27	0.676063879	432	cg07828495	chr7	47323322	47323372	LOC105610560	Distal Intergenic
9836	V9836	0.490628299	11.13313594	1.51E-27	1.81E-27	0.698307571	432	cg05634856	chr8	39357833	39357883	LOC105611309	Intron (XR_001435020.1/LOC105611309, intron 1 of 4)
31918	V31918	0.490612611	11.13270749	1.51E-27	1.82E-27	0.673898873	432	cg23159827	chr2	135091693	135091743	SP3	Distal Intergenic
19150	V19150	0.490611206	11.13266915	1.51E-27	1.82E-27	0.709260639	432	cg13078884	chr4	68763519	68763569	EVX1	Promoter (<=1kb)
5910	V5910	0.490594719	11.13221888	1.52E-27	1.82E-27	0.656823261	432	cg02497242	chr2	136722460	136722510	HAT1	Exon (XM_004004594.2/HAT1, exon 7 of 11)
9883	V9883	0.490536484	11.13062859	1.55E-27	1.85E-27	0.676913586	432	cg05671661
6073	V6073	0.490533931	11.13055886	1.55E-27	1.85E-27	0.697923457	432	cg02611007	chr7	14369654	14369704	MAP2K5	Intron (XM_004010259.3/MAP2K5, intron 19 of 21)
6310	V6310	0.490494864	11.12949208	1.56E-27	1.87E-27	0.662480212	432	cg02793450	chr15	33813989	33814039	ZNF202	Promoter (<=1kb)
15260	V15260	0.490481236	11.12911997	1.57E-27	1.88E-27	0.676867027	432	cg09913581	chr1	18637727	18637777	ERI3	Intron (XM_012121196.2/ERI3, intron 7 of 7)
19800	V19800	0.490430484	11.12773421	1.59E-27	1.91E-27	0.675866002	432	cg13571262	chr7	8915975	8916025	LOC105615610	Intron (XR_001434882.1/LOC105615610, intron 1 of 2)
8971	V8971	0.490421601	11.12749168	1.60E-27	1.91E-27	0.655228606	432	cg04958293	chrX	38625438	38625488	CASK	3' UTR
1892	V1892	0.490419464	11.12743331	1.60E-27	1.91E-27	0.716465686	432	cg19233240	chr11	11342498	11342548	BCAS3	Intron (XM_012185238.1/BCAS3, intron 23 of 24)
22176	V22176	0.490390984	11.12665575	1.61E-27	1.92E-27	0.668835553	432	cg15388054	chr8	50932909	50932959	SYNCRIP	3' UTR
17552	V17552	0.490390683	11.12664754	1.61E-27	1.92E-27	0.68301285	432	cg11805060	chr7	43343644	43343694	HERC1	Exon (XM_012181379.2/HERC1, exon 38 of 79)
16240	V16240	0.490376664	11.12626478	1.62E-27	1.93E-27	0.676599311	432	cg10721494	chr11	47419713	47419763	DDX42	Intron (XM_012186311.2/DDX42, intron 4 of 17)
14053	V14053	0.490360624	11.12582688	1.62E-27	1.94E-27	0.651259428	432	cg08984427	chr12	58228255	58228305	RALGPS2	Exon (XM_015099335.1/RALGPS2, exon 8 of 20)
17490	V17490	0.490290111	11.12390188	1.66E-27	1.98E-27	0.671896825	432	cg11749379	chr17	58486350	58486400	MED13L	3' UTR
21412	V21412	0.490286075	11.12379169	1.66E-27	1.98E-27	0.676343235	432	cg14815090	chr4	46220367	46220417	KMT2E	5' UTR
21598	V21598	0.490257972	11.12302454	1.67E-27	1.99E-27	0.664912934	432	cg14950255	chr14	37607786	37607836	ZFHX3	Exon (XM_015100188.1/ZFHX3, exon 13 of 15)
5313	V5313	0.490225618	11.12214139	1.69E-27	2.01E-27	0.686644473	432	cg02044006	chr5	55051609	55051659	TCERG1	Intron (XM_012179294.1/TCERG1, intron 5 of 21)
36308	V36308	0.490213264	11.12180415	1.69E-27	2.01E-27	0.667950927	432	cg26717772	chr1	226144542	226144592	IQCJ	Exon (XM_012100514.2/IQCJ, exon 4 of 4)
25011	V25011	0.490183265	11.12098532	1.71E-27	2.03E-27	0.667031381	432	cg17651763	chr11	12314291	12314341	USP32	Exon (XM_015098474.1/USP32, exon 27 of 34)
5874	V5874	0.490182437	11.12096274	1.71E-27	2.03E-27	0.66132787	432	cg02470288	chr2	163689512	163689562	LOC105609180	Distal Intergenic
15022	V15022	0.490166448	11.12052631	1.71E-27	2.04E-27	0.685701648	432	cg09709853	chr5	85029999	85030049	TMEM161B	Exon (XM_012178937.1/TMEM161B, exon 8 of 12)
12375	V12375	0.490155331	11.1202229	1.72E-27	2.04E-27	0.698540367	432	cg07630144	chr7	73536536	73536586	ZBTB1	Exon (XM_004010718.3/ZBTB1, exon 2 of 3)
12437	V12437	0.490153585	11.12017522	1.72E-27	2.04E-27	0.66520393	432	cg07680348	chr6	13341037	13341087	AP1AR	Exon (XM_015096373.1/AP1AR, exon 4 of 8)
11668	V11668	0.490148538	11.12003747	1.72E-27	2.04E-27	0.676156998	432	cg07034180	chr5	100520597	100520647	LOC105609312	Distal Intergenic
3605	V3605	0.490140222	11.1198105	1.73E-27	2.05E-27	0.683338765	432	cg00715063	chr7	14706994	14707044	PIAS1	Exon (XM_015096836.1/PIAS1, exon 2 of 14)
32044	V32044	0.490072223	11.11795467	1.76E-27	2.09E-27	0.685468852	432	cg23250289	chr8	48104453	48104503	SRSF12	Exon (XM_012182791.2/SRSF12, exon 2 of 5)
6808	V6808	0.49006005	11.11762248	1.77E-27	2.09E-27	0.691265481	432	cg03215611	chr1	245866274	245866324	SLC25A36	Intron (XM_015092641.1/SLC25A36, intron 4 of 6)
30181	V30181	0.490041624	11.11711961	1.78E-27	2.10E-27	0.692743738	432	cg21738950	chr22	32525256	32525306	TCF7L2	Intron (XM_015103420.1/TCF7L2, intron 5 of 14)
4147	V4147	0.490030503	11.11681613	1.78E-27	2.11E-27	0.683909116	432	cg01130242	chr3	10337521	10337571	MAPKAP1	Intron (XM_012159507.2/MAPKAP1, intron 5 of 12)
8206	V8206	0.490019392	11.11651291	1.79E-27	2.11E-27	0.681813949	432	cg04339551	chr1	267504995	267505045	DYRK1A	Exon (XM_004003407.3/DYRK1A, exon 4 of 12)
14381	V14381	0.490012513	11.1163252	1.79E-27	2.12E-27	0.67860136	432	cg09228482	chr7	9004975	9005025	AP3B1	Intron (XM_012180683.2/AP3B1, intron 20 of 26)
25623	V25623	0.489971856	11.11521574	1.81E-27	2.14E-27	0.695339417	432	cg18158719	chr1	10083550	10083600	ZMYM4	Exon (XM_015091852.1/ZMYM4, exon 5 of 30)
82	V82	0.489908174	11.11347809	1.84E-27	2.17E-27	0.680300773	432	cg00861228	chr3	31377888	31377938	ATAD2B	Intron (XM_012165522.2/ATAD2B, intron 16 of 28)
6900	V6900	0.489904172	11.11336892	1.84E-27	2.17E-27	0.66324844	432	cg03286410	chrX	60792672	60792722	OGT	Intron (XM_004022177.3/OGT, intron 4 of 21)
9752	V9752	0.489893121	11.11306737	1.85E-27	2.18E-27	0.665238849	432	cg05570066	chr1	249625126	249625176	LOC105604262	Distal Intergenic
427	V427	0.489827381	11.11127375	1.88E-27	2.22E-27	0.667427135	432	cg04347414
31456	V31456	0.48981871	11.11103721	1.89E-27	2.22E-27	0.665134091	432	cg22795763	chr14	25682388	25682438	CNOT1	Exon (XM_004015040.2/CNOT1, exon 20 of 49)
10740	V10740	0.489811962	11.1108531	1.89E-27	2.22E-27	0.673712636	432	cg06374441	chr1	46648376	46648426	NEGR1	3' UTR
17304	V17304	0.489811799	11.11084866	1.89E-27	2.22E-27	0.688902598	432	cg11591224	chr1	37476978	37477028	DOCK7	Exon (XM_012164017.2/DOCK7, exon 13 of 39)
27900	V27900	0.489805734	11.11068319	1.90E-27	2.23E-27	0.665029332	432	cg19946506	chr2	133051440	133051490	KIAA1715	Intron (XM_012133174.2/KIAA1715, intron 6 of 12)
27074	V27074	0.489805578	11.11067893	1.90E-27	2.23E-27	0.680743086	432	cg19329104	chr3	150295745	150295795	CPSF6	Exon (XM_015094759.1/CPSF6, exon 4 of 10)
14915	V14915	0.489803045	11.11060983	1.90E-27	2.23E-27	0.668940311	432	cg09635069	chr3	205664912	205664962	LOC105608615	3' UTR
36590	V36590	0.48979051	11.11026787	1.90E-27	2.23E-27	0.680952603	432	cg26962970	chr22	21396705	21396755	BTRC	Intron (XM_004020119.3/BTRC, intron 4 of 14)
14581	V14581	0.489776222	11.10987808	1.91E-27	2.24E-27	0.674958097	432	cg09394345	chr18	10638652	10638702	LOC105603050	Distal Intergenic
33234	V33234	0.489771912	11.10976049	1.91E-27	2.24E-27	0.673794115	432	cg24249775	chr11	40537364	40537414	KRT10	Promoter (<=1kb)
24248	V24248	0.489769337	11.10969025	1.92E-27	2.24E-27	0.653610671	432	cg17041137	chr1	250533236	250533286	STAG1	Exon (XM_012102945.2/STAG1, exon 5 of 34)
16030	V16030	0.489766277	11.10960676	1.92E-27	2.24E-27	0.683548282	432	cg10569638	chr3	74129445	74129495	NRXN1	Intron (XM_015094031.1/NRXN1, intron 20 of 22)
22514	V22514	0.489760051	11.10943694	1.92E-27	2.25E-27	0.676738989	432	cg15671915	chr23	34711363	34711413	LOC105604459	Exon (XR_001023985.2/LOC105604459, exon 2 of 2)
10041	V10041	0.489685677	11.1074081	1.96E-27	2.29E-27	0.681429835	432	cg05803741	chr12	49694510	49694560	SPEN	Exon (XM_015099297.1/SPEN, exon 3 of 18)
21658	V21658	0.489681944	11.10730627	1.96E-27	2.29E-27	0.683478443	432	cg14992835	chr25	24509853	24509903	RUFY2	Exon (XM_015104392.1/RUFY2, exon 12 of 17)
23717	V23717	0.489669361	11.10696306	1.97E-27	2.30E-27	0.682337741	432	cg16637621	chr17	44920303	44920353	SFSWAP	Intron (XM_004017303.3/SFSWAP, intron 1 of 19)
21451	V21451	0.489640847	11.10618529	1.99E-27	2.32E-27	0.683571562	432	cg14851231	chr3	35557664	35557714	SPDYA	Exon (XM_012167122.2/SPDYA, exon 7 of 8)
25947	V25947	0.489621145	11.10564791	2.00E-27	2.33E-27	0.674643822	432	cg18409580	chr25	24797973	24798023	CCAR1	Intron (XM_012105193.2/CCAR1, intron 13 of 24)
29602	V29602	0.489616225	11.10551372	2.00E-27	2.33E-27	0.689822144	432	cg21286076	chr5	60561683	60561733	GLRA1	Promoter (<=1kb)
20735	V20735	0.489615841	11.10550325	2.00E-27	2.33E-27	0.663562715	432	cg14315889	chr14	20568146	20568196	LOC105608140	Distal Intergenic
10488	V10488	0.489586632	11.10470659	2.02E-27	2.35E-27	0.669952975	432	cg06165608	chr15	35646087	35646137	SOX6	Exon (XM_015100742.1/SOX6, exon 6 of 19)
1347	V1347	0.489560403	11.10399125	2.03E-27	2.36E-27	0.669440823	432	cg13354982	chr19	16895726	16895776	BRPF1	3' UTR
20588	V20588	0.489509246	11.10259609	2.06E-27	2.39E-27	0.680975882	432	cg14201131	chr15	45956045	45956095	APBB1	Exon (XM_015101051.1/APBB1, exon 12 of 17)
29272	V29272	0.489425239	11.10030525	2.11E-27	2.45E-27	0.656346028	432	cg21040165	chr13	61075876	61075926	ASXL1	Exon (XM_015099825.1/ASXL1, exon 13 of 14)
11266	V11266	0.48941254	11.09995897	2.12E-27	2.45E-27	0.684817022	432	cg06750881	chr2	164955040	164955090	GTDC1	Intron (XM_012138353.2/GTDC1, intron 6 of 10)
9195	V9195	0.489365918	11.09868772	2.14E-27	2.48E-27	0.697900177	432	cg05136263	chr3	79091361	79091411	SIX2	Promoter (<=1kb)
3965	V3965	0.48933045	11.09772068	2.16E-27	2.51E-27	0.689228513	432	cg00988788	chr3	63956929	63956979	LOC106991019	Distal Intergenic
21216	V21216	0.489304492	11.09701295	2.18E-27	2.53E-27	0.71240339	432	cg14666740	chr13	67033186	67033236	SLC32A1	Exon (XM_004014569.3/SLC32A1, exon 3 of 4)
22428	V22428	0.489274846	11.0962047	2.20E-27	2.55E-27	0.676203557	432	cg15601638	chr3	45039247	45039297	EHBP1	Intron (XM_004005849.3/EHBP1, intron 21 of 25)
17489	V17489	0.489217648	11.09464536	2.23E-27	2.59E-27	0.67920663	432	cg11748993	chr13	22130339	22130389	DNAJC1	Exon (XM_004014216.3/DNAJC1, exon 4 of 12)
23236	V23236	0.489141342	11.09256531	2.28E-27	2.64E-27	0.678880715	432	cg16242634	chr7	43304149	43304199	HERC1	Exon (XM_012181379.2/HERC1, exon 23 of 79)
28491	V28491	0.489124987	11.0921195	2.29E-27	2.65E-27	0.687540739	432	cg20402480	chr6	43920633	43920683	DHX15	Exon (XM_004009739.3/DHX15, exon 12 of 14)
2830	V2830	0.489115811	11.09186939	2.30E-27	2.66E-27	0.673945433	432	cg00079224	chr24	26281311	26281361	LOC106991889	Promoter (1-2kb)
33004	V33004	0.489094749	11.09129529	2.31E-27	2.67E-27	0.683338765	432	cg24042348	chr8	85547914	85547964	QKI	3' UTR
9380	V9380	0.489071123	11.09065135	2.33E-27	2.69E-27	0.649664773	432	cg05266211	chr4	49245704	49245754	NRCAM	Intron (XM_015095275.1/NRCAM, intron 26 of 29)
881	V881	0.48905817	11.09029829	2.34E-27	2.70E-27	0.682721855	432	cg08498064	chr14	25710894	25710944	CNOT1	5' UTR
9796	V9796	0.489053113	11.09016047	2.34E-27	2.70E-27	0.668300121	432	cg05605496	chr3	44110552	44110602	VPS54	Exon (XR_001037701.2/VPS54, exon 6 of 19)
36113	V36113	0.489047366	11.09000383	2.34E-27	2.70E-27	0.691032685	432	cg26561972	chr3	175703470	175703520	BTBD11	Exon (XM_015093958.1/BTBD11, exon 8 of 18)
1092	V1092	0.488942474	11.08714519	2.41E-27	2.78E-27	0.670232331	432	cg10931167	chr3	150295739	150295789	CPSF6	Exon (XM_015094759.1/CPSF6, exon 4 of 10)
21624	V21624	0.48894067	11.08709603	2.41E-27	2.78E-27	0.701752957	432	cg14973446	chr2	185013218	185013268	TRNAW-CCA	Distal Intergenic
6844	V6844	0.488916449	11.086436	2.43E-27	2.80E-27	0.673037527	432	cg03237342	chr7	50131169	50131219	TCF12	Intron (XM_012181474.1/TCF12, intron 4 of 19)
15051	V15051	0.488909191	11.08623823	2.43E-27	2.80E-27	0.673037527	432	cg09732542	chr1	248754693	248754743	ARMC8	Exon (XM_015092647.1/ARMC8, exon 13 of 22)
19345	V19345	0.488898397	11.08594408	2.44E-27	2.81E-27	0.676145358	432	cg13227584	chr8	5689683	5689733	PHIP	3' UTR
31276	V31276	0.488896466	11.08589147	2.44E-27	2.81E-27	0.703312692	432	cg22660049
30701	V30701	0.488859954	11.08489656	2.47E-27	2.83E-27	0.666204954	432	cg22174191	chr8	26567059	26567109	CDK19	Promoter (<=1kb)
32051	V32051	0.488859656	11.08488842	2.47E-27	2.83E-27	0.651748301	432	cg23257903	chr3	64747626	64747676	LOC105612568	Exon (XR_001434300.1/LOC105612568, exon 5 of 5)
16480	V16480	0.488849099	11.08460076	2.48E-27	2.84E-27	0.667869448	432	cg10924987	chr7	62633183	62633233	DDHD1	Exon (XM_015097079.1/DDHD1, exon 10 of 18)
12151	V12151	0.488831586	11.08412359	2.49E-27	2.85E-27	0.698447248	432	cg07431199	chr7	33456407	33456457	DLL4	Promoter (3-4kb)
29191	V29191	0.488824999	11.0839441	2.49E-27	2.86E-27	0.679497625	432	cg20970027	chr25	43026502	43026552	DRGX	Downstream (1-2kb)
1681	V1681	0.488806904	11.08345108	2.50E-27	2.87E-27	0.663062203	432	cg17002377	chrX	113674871	113674921	LOC101108550	Exon (XM_015105081.1/LOC101108550, exon 3 of 3)
16595	V16595	0.488780772	11.08273907	2.52E-27	2.89E-27	0.685445572	432	cg11014690	chr3	10070414	10070464	PBX3	Intron (XM_012162805.2/PBX3, intron 4 of 10)
23442	V23442	0.488724951	11.08121827	2.56E-27	2.93E-27	0.681685911	432	cg16419429	chr1	257301687	257301737	BRWD1	Exon (XM_012103761.2/BRWD1, exon 1 of 38)
20611	V20611	0.488691095	11.08029593	2.59E-27	2.96E-27	0.671105317	432	cg14220710	chrX	22384294	22384344	ARX	Distal Intergenic
9846	V9846	0.488687549	11.08019931	2.59E-27	2.96E-27	0.685969364	432	cg05642781	chr1	19117045	19117095	C1H1orf228	Intron (XM_015091934.1/C1H1orf228, intron 2 of 12)
19306	V19306	0.488647812	11.07911682	2.62E-27	2.99E-27	0.667927647	432	cg13193654	chr22	21397026	21397076	BTRC	Intron (XM_004020119.3/BTRC, intron 4 of 14)
11351	V11351	0.488639057	11.07887833	2.62E-27	3.00E-27	0.678415122	432	cg06798772	chr25	30951335	30951385	C25H10orf11	Intron (XM_012105395.2/C25H10orf11, intron 2 of 5)
19471	V19471	0.488549538	11.07643991	2.69E-27	3.07E-27	0.680871124	432	cg13313753	chr8	37431425	37431475	PNISR	Exon (XM_004011253.2/PNISR, exon 12 of 12)
29957	V29957	0.488519513	11.07562211	2.71E-27	3.09E-27	0.714451997	432	cg21574459	chr23	56353347	56353397	WDR7	Intron (XM_015103784.1/WDR7, intron 20 of 25)
17613	V17613	0.488486908	11.0747341	2.74E-27	3.12E-27	0.709854269	432	cg11848212
17902	V17902	0.488417743	11.07285044	2.79E-27	3.18E-27	0.682198063	432	cg12094196	chr6	70838915	70838965	CLOCK	5' UTR
19469	V19469	0.488416861	11.07282643	2.79E-27	3.18E-27	0.667625012	432	cg13313407	chr2	152185860	152185910	NR4A2	3' UTR
34754	V34754	0.488414154	11.07275269	2.79E-27	3.18E-27	0.67535385	432	cg25499940	chr17	68094888	68094938	EWSR1	Intron (XM_012098020.2/EWSR1, intron 9 of 16)
10118	V10118	0.488409185	11.07261739	2.80E-27	3.18E-27	0.680754726	432	cg05867048	chr17	54381715	54381765	CUX2	Intron (XM_015101404.1/CUX2, intron 1 of 25)
1246	V1246	0.488408382	11.07259551	2.80E-27	3.18E-27	0.678112487	432	cg12288943	chr7	43304105	43304155	HERC1	Exon (XM_012181379.2/HERC1, exon 23 of 79)
10849	V10849	0.488392302	11.07215761	2.81E-27	3.20E-27	0.680277493	432	cg06457237	chr23	23812494	23812544	ASXL3	Intron (XM_015103606.1/ASXL3, intron 3 of 13)
7050	V7050	0.488367229	11.07147485	2.83E-27	3.22E-27	0.674934817	432	cg03427491	chr14	37173379	37173429	LOC106991598	Distal Intergenic
35774	V35774	0.488362528	11.07134682	2.83E-27	3.22E-27	0.66199134	432	cg26282474	chr3	4136176	4136226	DDX31	Intron (XM_012160866.2/DDX31, intron 17 of 19)
13293	V13293	0.488335295	11.07060526	2.86E-27	3.24E-27	0.671198436	432	cg08391895	chr1	86673541	86673591	RBM15	Exon (XM_012178197.2/RBM15, exon 3 of 5)
25840	V25840	0.488322089	11.07024568	2.87E-27	3.25E-27	0.686458236	432	cg18329378	chr1	248754593	248754643	ARMC8	Exon (XM_015092647.1/ARMC8, exon 13 of 22)
31141	V31141	0.488321989	11.07024296	2.87E-27	3.25E-27	0.678007729	432	cg22527583	chr2	163013376	163013426	LOC101114685	Distal Intergenic
24342	V24342	0.488278311	11.06905364	2.90E-27	3.29E-27	0.685981004	432	cg17115241	chr9	19284008	19284058	KHDRBS3	3' UTR
10495	V10495	0.488265001	11.06869125	2.91E-27	3.30E-27	0.679439426	432	cg06169018	chr16	16946989	16947039	IPO11	Exon (XM_004016947.3/IPO11, exon 16 of 30)
30018	V30018	0.488241723	11.06805746	2.93E-27	3.32E-27	0.675284012	432	cg21615655	chr21	17305957	17306007	ALG8	Exon (XM_004019429.3/ALG8, exon 10 of 13)
6134	V6134	0.488225623	11.06761911	2.94E-27	3.33E-27	0.685876245	432	cg02658957	chr25	30539167	30539217	KAT6B	Exon (XM_015104456.1/KAT6B, exon 8 of 18)
7558	V7558	0.488193691	11.06674973	2.97E-27	3.36E-27	0.703207934	432	cg03821809	chr9	28364454	28364504	RNF139	Exon (XM_015097657.1/RNF139, exon 4 of 4)
23892	V23892	0.488100339	11.06420838	3.05E-27	3.44E-27	0.688087811	432	cg16767177	chr7	19982790	19982840	NPTN	Intron (XM_004010288.3/NPTN, intron 6 of 8)
10173	V10173	0.488064791	11.06324071	3.08E-27	3.47E-27	0.673130645	432	cg05914600	chr13	35117828	35117878	WAC	3' UTR
37005	V37005	0.488048252	11.0627905	3.09E-27	3.49E-27	0.673607878	432	cg27290305
20824	V20824	0.488009059	11.0617237	3.13E-27	3.52E-27	0.682710215	432	cg14387632	chr11	25422472	25422522	TRNAW-CCA	Distal Intergenic
34218	V34218	0.487953669	11.06021613	3.17E-27	3.58E-27	0.682430859	432	cg25060297	chr4	33154049	33154099	DMTF1	Exon (XM_015095235.1/DMTF1, exon 8 of 18)
15416	V15416	0.487932142	11.05963022	3.19E-27	3.60E-27	0.669289506	432	cg10053944	chr9	59136455	59136505	EXT1	Intron (XM_004011769.3/EXT1, intron 1 of 10)
4779	V4779	0.487905841	11.05891443	3.22E-27	3.62E-27	0.695607133	432	cg01635585	chr1	155292070	155292120	EPHA3	Distal Intergenic
1284	V1284	0.4879008	11.05877724	3.22E-27	3.62E-27	0.716011733	432	cg12651099	chr1	86556211	86556261	KCNC4	Promoter (<=1kb)
12677	V12677	0.48789207	11.05853967	3.23E-27	3.63E-27	0.680696527	432	cg07878960	chr7	43304143	43304193	HERC1	Exon (XM_012181379.2/HERC1, exon 23 of 79)
2982	V2982	0.487858504	11.05762621	3.26E-27	3.66E-27	0.684223391	432	cg00196544	chr14	25710801	25710851	CNOT1	Exon (XM_004015040.2/CNOT1, exon 2 of 49)
35082	V35082	0.487854003	11.05750371	3.26E-27	3.67E-27	0.703696806	432	cg25734186	chr22	32252282	32252332	VTI1A	3' UTR
28861	V28861	0.487811369	11.05634354	3.30E-27	3.71E-27	0.685527051	432	cg20690201	chr5	67061931	67061981	LOC106991199	Distal Intergenic
14419	V14419	0.487807501	11.05623828	3.31E-27	3.71E-27	0.654227582	432	cg09263213	chr1	66541368	66541418	ZNF326	Exon (XM_015092093.1/ZNF326, exon 5 of 12)
32733	V32733	0.487776922	11.0554062	3.33E-27	3.74E-27	0.673002607	432	cg23812660	chr2	164419373	164419423	ZEB2	Intron (XM_012138277.2/ZEB2, intron 1 of 14)
17781	V17781	0.487740271	11.05440893	3.37E-27	3.78E-27	0.674422665	432	cg11987676	chr22	22065914	22065964	GBF1	Intron (XM_012102855.2/GBF1, intron 4 of 38)
16866	V16866	0.487720129	11.05386088	3.39E-27	3.79E-27	0.685946084	432	cg11221149	chr1	18680570	18680620	ERI3	3' UTR
20872	V20872	0.487678032	11.05271552	3.43E-27	3.83E-27	0.697946736	432	cg14419939	chr1	90092561	90092611	LOC105615308	Exon (XM_012178899.2/RSBN1, exon 7 of 8)
33651	V33651	0.487645045	11.05181805	3.46E-27	3.87E-27	0.701764596	432	cg24574398	chr1	273340043	273340093	SATB1	Intron (XM_015092727.1/SATB1, intron 8 of 9)
13255	V13255	0.487637632	11.05161637	3.46E-27	3.87E-27	0.683874197	432	cg08362119	chr15	26175475	26175525	LOC105602189	Distal Intergenic
33345	V33345	0.487635756	11.05156535	3.47E-27	3.87E-27	0.6785548	432	cg24325388	chr3	149753639	149753689	FRS2	Exon (XM_012174585.2/FRS2, exon 5 of 9)
1022	V1022	0.487630968	11.05143509	3.47E-27	3.88E-27	0.698808083	432	cg10180465	chr12	42863033	42863083	RERE	Exon (XM_015099047.1/RERE, exon 4 of 21)
26941	V26941	0.48761781	11.05107712	3.48E-27	3.89E-27	0.692185027	432	cg19227202	chr7	66553583	66553633	AP5M1	3' UTR
4729	V4729	0.487597056	11.0505125	3.50E-27	3.90E-27	0.691207282	432	cg01591148	chrX	43862696	43862746	ARHGEF9	Exon (XM_012106573.2/ARHGEF9, exon 6 of 10)
20890	V20890	0.48758573	11.05020439	3.52E-27	3.92E-27	0.686539715	432	cg14428370	chr10	53959171	53959221	POU4F1	Distal Intergenic
12364	V12364	0.487571177	11.04980851	3.53E-27	3.93E-27	0.69262734	432	cg07619251	chr13	11953458	11953508	TAF3	Intron (XM_004014182.3/TAF3, intron 3 of 6)
35483	V35483	0.487508248	11.04809669	3.59E-27	3.99E-27	0.709749511	432	cg26062249	chr22	20705453	20705503	LOC105604251	Intron (XR_001023689.2/LOC105604251, intron 1 of 2)
22420	V22420	0.487507435	11.04807456	3.59E-27	3.99E-27	0.683501723	432	cg15595499	chr3	62973827	62973877	PAPOLG	Exon (XM_012170877.2/PAPOLG, exon 7 of 23)
28255	V28255	0.487456739	11.04669563	3.64E-27	4.05E-27	0.682104945	432	cg20217707	chr2	165013472	165013522	GTDC1	Intron (XM_012138353.2/GTDC1, intron 7 of 10)
11941	V11941	0.487450085	11.04651464	3.65E-27	4.06E-27	0.684747183	432	cg07259781	chr6	37361482	37361532	LCORL	Exon (XM_015096407.1/LCORL, exon 4 of 7)
8213	V8213	0.487410324	11.04543319	3.69E-27	4.10E-27	0.701799516	432	cg04343139	chr16	8737793	8737843	TNPO1	Intron (XM_004016897.3/TNPO1, intron 20 of 24)
11833	V11833	0.487406005	11.04531574	3.69E-27	4.10E-27	0.691463358	432	cg07172031	chr7	19063296	19063346	ARIH1	Exon (XM_015096710.1/ARIH1, exon 6 of 17)
10850	V10850	0.487403681	11.04525252	3.70E-27	4.10E-27	0.710203464	432	cg06457419	chr22	32550562	32550612	TCF7L2	Intron (XM_015103420.1/TCF7L2, intron 7 of 14)
8351	V8351	0.487386858	11.044795	3.71E-27	4.12E-27	0.677239501	432	cg04461329	chr18	55699045	55699095	CPSF2	Exon (XM_004017954.3/CPSF2, exon 16 of 16)
20268	V20268	0.487290671	11.04217916	3.81E-27	4.22E-27	0.677740013	432	cg13942194	chr15	53978984	53979034	EMSY	Exon (XM_004016336.3/EMSY, exon 15 of 21)
14422	V14422	0.487282289	11.04195122	3.82E-27	4.23E-27	0.675796164	432	cg09267036	chr18	43947770	43947820	CFL2	Intron (XM_015102004.1/CFL2, intron 2 of 3)
8646	V8646	0.487243916	11.04090776	3.86E-27	4.27E-27	0.670197411	432	cg04676614	chr19	43412333	43412383	SLMAP	Exon (XM_012099840.2/SLMAP, exon 4 of 24)
35273	V35273	0.487242531	11.04087009	3.87E-27	4.27E-27	0.680871124	432	cg25888520	chr13	66892854	66892904	RALGAPB	Exon (XM_004014567.3/RALGAPB, exon 8 of 30)
28185	V28185	0.487237903	11.04074424	3.87E-27	4.28E-27	0.682931372	432	cg20167150	chr1	67445852	67445902	ZNF644	Exon (XM_012175832.2/ZNF644, exon 6 of 8)
32803	V32803	0.487210882	11.04000951	3.90E-27	4.31E-27	0.695199739	432	cg23856718	chr14	39765019	39765069	URI1	Intron (XM_004015132.3/URI1, intron 4 of 10)
28957	V28957	0.487209925	11.03998349	3.90E-27	4.31E-27	0.664214545	432	cg20761435	chr14	41682758	41682808	LOC105607554	Distal Intergenic
36760	V36760	0.487193924	11.03954843	3.92E-27	4.32E-27	0.691009405	432	cg27092966	chr7	9088551	9088601	AP3B1	Intron (XM_012180683.2/AP3B1, intron 7 of 26)
16461	V16461	0.487171109	11.03892808	3.94E-27	4.35E-27	0.682442499	432	cg10910781	chr12	37224745	37224795	VAMP4	Exon (XM_004013694.3/VAMP4, exon 6 of 8)
27895	V27895	0.487140151	11.03808638	3.98E-27	4.38E-27	0.696584878	432	cg19941852	chr18	6026988	6027038	MEF2A	Exon (XM_004017715.3/MEF2A, exon 4 of 10)
21611	V21611	0.487121062	11.03756737	4.00E-27	4.40E-27	0.673782475	432	cg14962578	chr11	52998064	52998114	TNRC6C	Exon (XM_012186506.2/TNRC6C, exon 14 of 24)
8657	V8657	0.487113932	11.03737352	4.01E-27	4.41E-27	0.69703883	432	cg04684673	chr4	68514257	68514307	HIBADH	Intron (XM_004008248.2/HIBADH, intron 6 of 9)
34670	V34670	0.487102619	11.03706594	4.02E-27	4.42E-27	0.685259335	432	cg25430306	chr12	17977235	17977285	ESRRG	Intron (XM_004013593.3/ESRRG, intron 6 of 6)
31097	V31097	0.487099061	11.03696922	4.02E-27	4.42E-27	0.668963591	432	cg22499652	chr1	60476034	60476084	PRKACB	5' UTR
32877	V32877	0.487092242	11.03678384	4.03E-27	4.43E-27	0.719247602	432	cg23931487	chr3	132549036	132549086	ATP5G2	Promoter (1-2kb)
34150	V34150	0.487084108	11.03656269	4.04E-27	4.44E-27	0.679683863	432	cg25007534	chr1	63756236	63756286	LMO4	Intron (XM_004002167.3/LMO4, intron 2 of 4)
10776	V10776	0.487077821	11.03639178	4.05E-27	4.44E-27	0.665064252	432	cg06407466	chr2	164454049	164454099	ZEB2	Intron (XM_012138277.2/ZEB2, intron 4 of 14)
17130	V17130	0.487046305	11.03553499	4.08E-27	4.48E-27	0.677414098	432	cg11445228	chr2	192118506	192118556	GLS	5' UTR
17769	V17769	0.487032237	11.03515255	4.10E-27	4.50E-27	0.656497346	432	cg11978813	chr18	54051610	54051660	TP53BP1	Exon (XM_004017930.3/TP53BP1, exon 25 of 28)
30883	V30883	0.487025819	11.0349781	4.10E-27	4.50E-27	0.698109694	432	cg22322375	chr15	40254874	40254924	USP47	3' UTR
18994	V18994	0.487023892	11.0349257	4.11E-27	4.50E-27	0.690893007	432	cg12958327	chr6	92011716	92011766	CNOT6L	5' UTR
35247	V35247	0.486994125	11.03411651	4.14E-27	4.54E-27	0.667031381	432	cg25869468	chr1	245227645	245227695	RASA2	Exon (XM_015092636.1/RASA2, exon 9 of 19)
10001	V10001	0.486980061	11.03373422	4.16E-27	4.55E-27	0.673561319	432	cg05775572	chr19	43342295	43342345	SLMAP	Exon (XM_012099826.2/SLMAP, exon 23 of 24)
37465	V37465	0.486976839	11.03364664	4.16E-27	4.55E-27	0.692173387	432	cg27665352	chr14	39812441	39812491	URI1	Distal Intergenic
32032	V32032	0.486943805	11.0327487	4.20E-27	4.59E-27	0.676180277	432	cg23240071	chr3	132724638	132724688	PCBP2	Exon (XM_015094612.1/PCBP2, exon 15 of 15)
31248	V31248	0.486940847	11.0326683	4.20E-27	4.59E-27	0.684828662	432	cg22619645	chr1	161407321	161407371	DCBLD2	Exon (XM_012188531.2/DCBLD2, exon 10 of 16)
21385	V21385	0.486931578	11.03241635	4.21E-27	4.60E-27	0.679101872	432	cg14795764	chr12	49694517	49694567	SPEN	Exon (XM_015099297.1/SPEN, exon 3 of 18)
7578	V7578	0.486910377	11.03184008	4.24E-27	4.63E-27	0.679008753	432	cg03835304	chr24	22243903	22243953	RBBP6	Exon (XM_004020844.3/RBBP6, exon 16 of 18)
23202	V23202	0.486907547	11.03176317	4.24E-27	4.63E-27	0.647697644	432	cg16205393	chr9	51673125	51673175	HNF4G	Distal Intergenic
17210	V17210	0.486902034	11.03161332	4.25E-27	4.63E-27	0.694920384	432	cg11517256	chr1	36333670	36333720	NFIA	3' UTR
28153	V28153	0.486900153	11.03156221	4.25E-27	4.63E-27	0.696596517	432	cg20140365	chr6	69454543	69454593	CHIC2	Intron (XM_004009829.2/CHIC2, intron 3 of 5)
1513	V1513	0.486879773	11.03100829	4.27E-27	4.66E-27	0.666286433	432	cg15229748	chr21	43886756	43886806	RBM4B	3' UTR
7878	V7878	0.486802576	11.02891021	4.37E-27	4.75E-27	0.682477419	432	cg04080945	chr10	47301145	47301195	DACH1	Distal Intergenic
19608	V19608	0.486775448	11.02817298	4.40E-27	4.79E-27	0.670744483	432	cg13421440	chr1	76677684	76677734	RTCA	5' UTR
6369	V6369	0.486728796	11.02690521	4.46E-27	4.84E-27	0.67985846	432	cg02856943	chr2	149171312	149171362	BAZ2B	Exon (XM_012136148.2/BAZ2B, exon 5 of 38)
14066	V14066	0.486709965	11.02639349	4.48E-27	4.87E-27	0.679753701	432	cg08991661	chr14	36631898	36631948	LOC105606377	Intron (XR_001435696.1/LOC105606377, intron 1 of 2)
27407	V27407	0.486705851	11.02628171	4.48E-27	4.87E-27	0.646580222	432	cg19575317	chrX	16118866	16118916	RS1	Downstream (<1kb)
13038	V13038	0.486691318	11.0258868	4.50E-27	4.89E-27	0.682966291	432	cg08181354	chr18	38065583	38065633	FOXG1	3' UTR
24945	V24945	0.486649669	11.02475512	4.55E-27	4.94E-27	0.687645498	432	cg17603248	chr22	21440903	21440953	POLL	Distal Intergenic
36968	V36968	0.486638646	11.02445561	4.57E-27	4.96E-27	0.715511221	432	cg27256262	chr23	24612895	24612945	KLHL14	Exon (XM_015103607.1/KLHL14, exon 4 of 11)
11625	V11625	0.486630741	11.02424083	4.58E-27	4.97E-27	0.695490735	432	cg07010768	chr22	31988723	31988773	VTI1A	Intron (XM_012102940.2/VTI1A, intron 6 of 7)
1603	V1603	0.486621685	11.02399478	4.59E-27	4.97E-27	0.670756123	432	cg16201028
24490	V24490	0.486581739	11.02290944	4.64E-27	5.02E-27	0.676261756	432	cg17228011	chr7	72666928	72666978	PPP2R5E	Exon (XM_012181792.1/PPP2R5E, exon 1 of 13)
4581	V4581	0.486557681	11.02225582	4.67E-27	5.05E-27	0.70664168	432	cg01475790	chr13	22495581	22495631	BMI1	3' UTR
36828	V36828	0.486504444	11.02080953	4.74E-27	5.12E-27	0.66643775	432	cg27145887	chr16	16947036	16947086	IPO11	Exon (XM_004016947.3/IPO11, exon 16 of 30)
34156	V34156	0.48649525	11.02055975	4.75E-27	5.13E-27	0.673503119	432	cg25011740	chr21	35520939	35520989	ZBTB44	Exon (XM_012101922.2/ZBTB44, exon 5 of 6)
28859	V28859	0.486357565	11.01681973	4.94E-27	5.33E-27	0.659546978	432	cg20689344	chr7	18522386	18522436	MYO9A	Exon (XM_012180885.2/MYO9A, exon 22 of 39)
32212	V32212	0.486333897	11.01617688	4.97E-27	5.36E-27	0.68175575	432	cg23396613	chr22	32054464	32054514	VTI1A	Intron (XM_012102940.2/VTI1A, intron 6 of 7)
12476	V12476	0.486304476	11.01537782	5.01E-27	5.40E-27	0.690834808	432	cg07707239	chr13	29389544	29389594	FAM188A	5' UTR
6368	V6368	0.486300445	11.01526834	5.01E-27	5.41E-27	0.69322097	432	cg02854502	chr23	3419894	3419944	ZADH2	Promoter (9-10kb)
1158	V1158	0.486269589	11.01443033	5.06E-27	5.45E-27	0.689763945	432	cg11471728	chrX	54216893	54216943	RBM10	Exon (XM_012106808.1/RBM10, exon 5 of 23)
34832	V34832	0.486268303	11.01439541	5.06E-27	5.45E-27	0.690555452	432	cg25558559	chr25	32462405	32462455	KCNMA1	Intron (NM_001303455.1/KCNMA1, intron 18 of 25)
28062	V28062	0.486253229	11.01398601	5.08E-27	5.47E-27	0.693954279	432	cg20074403	chr22	20653125	20653175	LOC105604251	Distal Intergenic
30845	V30845	0.486249879	11.01389505	5.09E-27	5.47E-27	0.658045442	432	cg22289282	chr3	116582679	116582729	LIN7A	Intron (XM_004006220.2/LIN7A, intron 3 of 5)
21970	V21970	0.486189136	11.01224547	5.17E-27	5.56E-27	0.67157091	432	cg15235378	chr5	49399731	49399781	LOC101122274	Exon (XM_015096076.1/LOC101122274, exon 5 of 5)
5042	V5042	0.486167183	11.01164934	5.20E-27	5.59E-27	0.673095726	432	cg01838095	chr25	24798182	24798232	CCAR1	Exon (XM_012105193.2/CCAR1, exon 14 of 25)
18408	V18408	0.486115029	11.01023317	5.28E-27	5.66E-27	0.670581525	432	cg12483296	chr3	98103326	98103376	TMEM182	Distal Intergenic
12708	V12708	0.486042741	11.00827041	5.38E-27	5.77E-27	0.666123475	432	cg07899808	chr2	184621567	184621617	INHBB	Downstream (1-2kb)
11716	V11716	0.486042196	11.00825563	5.39E-27	5.77E-27	0.680533569	432	cg07081182	chr12	68503816	68503866	RPS6KC1	5' UTR
25916	V25916	0.486039247	11.00817555	5.39E-27	5.77E-27	0.689496229	432	cg18384829	chr18	6026962	6027012	MEF2A	Exon (XM_004017715.3/MEF2A, exon 4 of 10)
17142	V17142	0.486032062	11.00798049	5.40E-27	5.78E-27	0.685177856	432	cg11452666	chr9	71490624	71490674	ZFPM2	Intron (XM_004011795.3/ZFPM2, intron 4 of 6)
5575	V5575	0.486009039	11.00735543	5.43E-27	5.82E-27	0.698226092	432	cg02229362	chr23	3419753	3419803	ZADH2	Promoter (9-10kb)
5441	V5441	0.485999049	11.00708421	5.45E-27	5.83E-27	0.68431651	432	cg02135871	chr1	215118510	215118560	PHC3	Exon (XM_012099500.2/PHC3, exon 7 of 15)
16490	V16490	0.485975305	11.00643958	5.49E-27	5.87E-27	0.689344911	432	cg10932466	chr3	12727426	12727476	RC3H2	Exon (XM_015094202.1/RC3H2, exon 10 of 20)
15772	V15772	0.485889741	11.00411682	5.62E-27	6.00E-27	0.680382252	432	cg10354618	chr5	84269974	84270024	RASA1	Exon (XM_015096185.1/RASA1, exon 20 of 26)
3054	V3054	0.485878009	11.00379835	5.63E-27	6.02E-27	0.678764317	432	cg00251636	chr16	6501903	6501953	MSX2	3' UTR
10679	V10679	0.48587679	11.00376525	5.64E-27	6.02E-27	0.680952603	432	cg06325045	chr5	47959041	47959091	PAIP2	Exon (XM_012178592.1/PAIP2, exon 2 of 4)
9031	V9031	0.485869345	11.00356317	5.65E-27	6.03E-27	0.68430487	432	cg05010272	chr5	99386802	99386852	PPIP5K2	Exon (XM_015096227.1/PPIP5K2, exon 27 of 28)
36318	V36318	0.485747536	11.000257	5.84E-27	6.22E-27	0.660233728	432	cg26724535	chr6	14144825	14144875	LOC101120332	Distal Intergenic
4619	V4619	0.485710216	10.99924415	5.90E-27	6.28E-27	0.689100475	432	cg01509444	chr7	65878266	65878316	TMEM260	Exon (XM_004010675.3/TMEM260, exon 3 of 17)
35482	V35482	0.485598535	10.99621347	6.09E-27	6.47E-27	0.696096005	432	cg26059407	chr8	34906061	34906111	GRIK2	3' UTR
33798	V33798	0.485577449	10.9956413	6.12E-27	6.51E-27	0.686935469	432	cg24704298	chr3	91127767	91127817	BIRC6	Intron (XM_012173585.1/BIRC6, intron 66 of 73)
22476	V22476	0.485528246	10.99430627	6.20E-27	6.60E-27	0.655822237	432	cg15649265	chr24	530916	530966	FBXL16	Intron (XM_015103843.1/FBXL16, intron 7 of 7)
18338	V18338	0.485505339	10.99368475	6.24E-27	6.63E-27	0.732388956	432	cg12434982	chr12	74890056	74890106	LHX9	Intron (XM_015099405.1/LHX9, intron 5 of 7)
13005	V13005	0.485494421	10.99338853	6.26E-27	6.65E-27	0.666530869	432	cg08162897	chrX	117988760	117988810	AMMECR1	Exon (XM_012107546.2/AMMECR1, exon 5 of 9)
7966	V7966	0.485442455	10.99197866	6.35E-27	6.74E-27	0.685841326	432	cg04142398	chr5	85537447	85537497	MEF2C	Exon (XM_012177548.2/MEF2C, exon 8 of 11)
1320	V1320	0.485400899	10.99085127	6.43E-27	6.82E-27	0.661688705	432	cg13016707	chr2	110259436	110259486	CLCN3	Exon (XM_004005343.3/CLCN3, exon 13 of 14)
14745	V14745	0.485388648	10.99051892	6.45E-27	6.84E-27	0.66584412	432	cg09529217	chrX	50312383	50312433	MAGED1	Exon (XM_004022074.3/MAGED1, exon 9 of 15)
28047	V28047	0.485365652	10.98989511	6.49E-27	6.88E-27	0.686935469	432	cg20059238	chr3	44660072	44660122	WDPCP	Intron (XM_015094321.1/WDPCP, intron 9 of 15)
1971	V1971	0.485349731	10.98946323	6.52E-27	6.91E-27	0.679939939	432	cg20128261	chr17	69413825	69413875	SMTN	Intron (XM_015101717.1/SMTN, intron 19 of 20)
17171	V17171	0.485337614	10.98913453	6.54E-27	6.93E-27	0.689263432	432	cg11473228	chr16	14076418	14076468	ADAMTS6	Exon (XM_015101273.1/ADAMTS6, exon 5 of 25)
35234	V35234	0.485335266	10.98907085	6.54E-27	6.93E-27	0.683385325	432	cg25860081	chr3	93022241	93022291	ZNF638	Exon (XM_012173609.2/ZNF638, exon 2 of 29)
29293	V29293	0.485289239	10.98782236	6.63E-27	7.01E-27	0.711798119	432	cg21057587	chr7	82453863	82453913	VSX2	Promoter (<=1kb)
2397	V2397	0.485265724	10.98718455	6.67E-27	7.05E-27	0.670988919	432	cg24462704	chr1	9918265	9918315	SFPQ	Exon (XM_015091851.1/SFPQ, exon 14 of 16)
32594	V32594	0.485188944	10.9851021	6.81E-27	7.20E-27	0.706560201	432	cg23696484
23974	V23974	0.485168861	10.98455743	6.85E-27	7.24E-27	0.672269299	432	cg16825463	chr11	35481679	35481729	LUC7L3	3' UTR
26264	V26264	0.485125397	10.98337871	6.93E-27	7.32E-27	0.675307291	432	cg18673419	chr9	52533945	52533995	LOC106991349	Promoter (2-3kb)
4108	V4108	0.485087833	10.98236004	7.00E-27	7.39E-27	0.657416892	432	cg01096814	chr23	24644025	24644075	KLHL14	Intron (XM_015103607.1/KLHL14, intron 4 of 10)
36091	V36091	0.485087783	10.98235868	7.00E-27	7.39E-27	0.654169383	432	cg26544327	chr2	143963108	143963158	GRB14	Exon (XM_012135480.2/GRB14, exon 8 of 10)
2811	V2811	0.484967977	10.97911008	7.24E-27	7.62E-27	0.678973834	432	cg00067520	chr20	10189315	10189365	BRPF3	Exon (XM_015102680.1/BRPF3, exon 6 of 14)
35450	V35450	0.484966801	10.97907821	7.24E-27	7.62E-27	0.661933141	432	cg26039576	chr3	102461990	102462040	INPP4A	Exon (XM_012173810.2/INPP4A, exon 23 of 23)
36565	V36565	0.484937621	10.97828705	7.30E-27	7.68E-27	0.694256914	432	cg26934853	chr21	29476106	29476156	KIRREL3	Intron (XM_015103107.1/KIRREL3, intron 1 of 16)
27085	V27085	0.484912067	10.97759425	7.35E-27	7.73E-27	0.683466803	432	cg19337222	chr21	35520701	35520751	ZBTB44	3' UTR
25564	V25564	0.484883153	10.97681037	7.41E-27	7.79E-27	0.686155601	432	cg18105886	chr10	28841832	28841882	N4BP2L1	Exon (XM_004012135.3/N4BP2L1, exon 5 of 6)
33238	V33238	0.4848721	10.97651072	7.43E-27	7.81E-27	0.682570537	432	cg24252591	chr1	227327058	227327108	RSRC1	Intron (XM_012100645.2/RSRC1, intron 3 of 9)
16831	V16831	0.484865	10.97631822	7.44E-27	7.82E-27	0.689752305	432	cg11201460	chr2	51572792	51572842	PAX5	Intron (XM_012120994.2/PAX5, intron 8 of 8)
1844	V1844	0.484836829	10.97555452	7.50E-27	7.87E-27	0.680638328	432	cg18619814	chr7	78384950	78385000	SRSF5	Intron (XM_012181923.2/SRSF5, intron 6 of 8)
28969	V28969	0.484803735	10.97465741	7.57E-27	7.93E-27	0.675272372	432	cg20773292	chr3	135315532	135315582	DIP2B	Exon (XM_012174302.1/DIP2B, exon 5 of 38)
13997	V13997	0.484786441	10.97418863	7.61E-27	7.97E-27	0.736067138	432	cg08938156	chr1	238860602	238860652	ZIC1	Promoter (<=1kb)
6340	V6340	0.484748175	10.97315135	7.69E-27	8.05E-27	0.693430487	432	cg02820960	chr1	53378305	53378355	ZZZ3	Promoter (<=1kb)
30957	V30957	0.484744952	10.97306398	7.69E-27	8.05E-27	0.671966664	432	cg22377379	chrX	102237834	102237884	STAG2	Exon (XM_004022364.3/STAG2, exon 33 of 36)
12203	V12203	0.484731726	10.97270549	7.72E-27	8.07E-27	0.688937517	432	cg07475202	chr4	30296780	30296830	SP4	3' UTR
9702	V9702	0.484703217	10.97193278	7.78E-27	8.12E-27	0.680812925	432	cg05528944	chr15	28642894	28642944	KMT2A	Exon (XM_012095526.2/KMT2A, exon 32 of 34)
8629	V8629	0.484676241	10.97120163	7.84E-27	8.18E-27	0.672385697	432	cg04663744	chr2	84639616	84639666	BNC2	Intron (XM_015093219.1/BNC2, intron 1 of 6)
16500	V16500	0.484673861	10.97113711	7.85E-27	8.18E-27	0.674981376	432	cg10935894	chr15	71602303	71602353	TTC17	Exon (XM_012096262.2/TTC17, exon 13 of 25)
29817	V29817	0.484653757	10.97059224	7.89E-27	8.22E-27	0.683525002	432	cg21458384	chr7	72666870	72666920	PPP2R5E	Exon (XM_012181792.1/PPP2R5E, exon 1 of 13)
22636	V22636	0.484648122	10.97043952	7.90E-27	8.23E-27	0.67792625	432	cg15762979	chr3	131752120	131752170	NCKAP1L	Exon (XM_004006271.3/NCKAP1L, exon 12 of 31)
35485	V35485	0.484644378	10.97033806	7.91E-27	8.23E-27	0.685177856	432	cg26063662	chr1	24442267	24442317	ELAVL4	3' UTR
3184	V3184	0.4846393	10.97020042	7.92E-27	8.24E-27	0.677809852	432	cg00359760	chr12	37224763	37224813	VAMP4	Exon (XM_004013694.3/VAMP4, exon 6 of 8)
8839	V8839	0.484628999	10.96992125	7.94E-27	8.26E-27	0.679625663	432	cg04840997	chr16	3206754	3206804	TLX3	Distal Intergenic
16681	V16681	0.484588228	10.96881631	8.03E-27	8.34E-27	0.736102058	432	cg11084334	chr19	17012895	17012945	LHFPL4	Promoter (<=1kb)
30136	V30136	0.484578684	10.96855767	8.05E-27	8.36E-27	0.67918335	432	cg21702953	chr7	28302881	28302931	LOC106991264	Distal Intergenic
13159	V13159	0.484561094	10.96808097	8.09E-27	8.40E-27	0.680789645	432	cg08281432	chr16	25160909	25160959	ARL15	Intron (XM_004016996.3/ARL15, intron 4 of 4)
7109	V7109	0.484553189	10.96786677	8.11E-27	8.41E-27	0.684688984	432	cg03472582	chr1	273340094	273340144	SATB1	Intron (XM_015092727.1/SATB1, intron 8 of 9)
20661	V20661	0.484551013	10.9678078	8.11E-27	8.41E-27	0.659779775	432	cg14257669	chr12	68137493	68137543	LOC106991472	Distal Intergenic
9763	V9763	0.484531385	10.96727591	8.16E-27	8.45E-27	0.669685259	432	cg05576116	chrX	49421520	49421570	HUWE1	Exon (XM_012106641.2/HUWE1, exon 78 of 85)
12220	V12220	0.484497921	10.9663691	8.23E-27	8.52E-27	0.695642052	432	cg07491547	chr7	34797053	34797103	ZNF106	Exon (XM_012181289.1/ZNF106, exon 16 of 19)
22114	V22114	0.484431309	10.96456418	8.39E-27	8.67E-27	0.715813856	432	cg15343536	chr1	36007622	36007672	NFIA	Intron (XM_012160811.2/NFIA, intron 2 of 10)
23584	V23584	0.484314508	10.96139972	8.66E-27	8.94E-27	0.669580501	432	cg16535512	chr14	40344062	40344112	ZNF536	Intron (XM_015100543.1/ZNF536, intron 9 of 9)
31750	V31750	0.484276612	10.96037309	8.75E-27	9.03E-27	0.70028634	432	cg23033318	chr1	227148376	227148426	RSRC1	Intron (XM_012100645.2/RSRC1, intron 5 of 9)
24600	V24600	0.484258467	10.95988156	8.79E-27	9.07E-27	0.675749604	432	cg17320717	chr6	45656770	45656820	RBPJ	Exon (XM_012179768.2/RBPJ, exon 6 of 11)
19324	V19324	0.484227903	10.95905363	8.87E-27	9.14E-27	0.692767017	432	cg13209256	chr14	6595477	6595527	LOC105609364	Intron (XR_001044935.2/LOC105609364, intron 1 of 4)
27486	V27486	0.48420081	10.95831976	8.93E-27	9.20E-27	0.66642611	432	cg19629835
1518	V1518	0.484169806	10.95747996	9.01E-27	9.27E-27	0.678263805	432	cg15283949	chr3	12203842	12203892	DENND1A	Intron (XM_012163262.2/DENND1A, intron 16 of 20)
35994	V35994	0.484161645	10.95725892	9.03E-27	9.29E-27	0.684991619	432	cg26452091	chr17	11393164	11393214	POU4F2	Distal Intergenic
19625	V19625	0.484129916	10.95639951	9.11E-27	9.36E-27	0.690567092	432	cg13433278	chr2	136602812	136602862	DLX1	Distal Intergenic
27887	V27887	0.484124417	10.95625059	9.12E-27	9.37E-27	0.669289506	432	cg19935914	chr3	133108739	133108789	EIF4B	Exon (XM_004006314.3/EIF4B, exon 5 of 15)
35592	V35592	0.484109496	10.95584648	9.16E-27	9.40E-27	0.6785548	432	cg26144663	chr14	39887894	39887944	ZNF536	Distal Intergenic
31672	V31672	0.484041739	10.95401143	9.33E-27	9.58E-27	0.678787597	432	cg22978368	chr12	41042583	41042633	PEX14	Intron (XM_004013728.3/PEX14, intron 4 of 8)
27175	V27175	0.484029535	10.95368092	9.36E-27	9.60E-27	0.678054288	432	cg19411464	chr1	45546408	45546458	SRSF11	Intron (XM_012173588.2/SRSF11, intron 3 of 12)
22849	V22849	0.484026197	10.95359054	9.37E-27	9.61E-27	0.675144334	432	cg15932677	chr3	80044740	80044790	LRPPRC	Distal Intergenic
24339	V24339	0.484022228	10.95348306	9.38E-27	9.61E-27	0.691253841	432	cg17114460	chr11	19848101	19848151	FLOT2	Exon (XM_015098543.1/FLOT2, exon 4 of 12)
15918	V15918	0.484013655	10.95325088	9.40E-27	9.63E-27	0.673770835	432	cg10481534	chr7	18808745	18808795	LOC101110145	Intron (XM_012180886.2/LOC101110145, intron 22 of 32)
31436	V31436	0.483944812	10.95138666	9.58E-27	9.80E-27	0.678741037	432	cg22781066	chr3	70017509	70017559	ERLEC1	Exon (XM_015093888.1/ERLEC1, exon 8 of 15)
19413	V19413	0.483927855	10.95092749	9.63E-27	9.84E-27	0.673596238	432	cg13276805	chr21	28778760	28778810	FAM118B	Exon (XM_012101888.2/FAM118B, exon 4 of 8)
22736	V22736	0.483921039	10.95074294	9.64E-27	9.85E-27	0.691661235	432	cg15840391	chr3	12743412	12743462	RC3H2	3' UTR
27477	V27477	0.483798395	10.94742231	9.97E-27	1.02E-26	0.680743086	432	cg19625557	chr10	76383904	76383954	PCCA	Intron (XM_015098256.1/PCCA, intron 21 of 23)
24977	V24977	0.483786952	10.94711252	1.00E-26	1.02E-26	0.673875594	432	cg17627640	chr26	31975310	31975360	LSM1	Exon (XM_004021778.2/LSM1, exon 3 of 4)
17831	V17831	0.48377064	10.94667091	1.00E-26	1.02E-26	0.685073098	432	cg12033551	chr17	62395856	62395906	SRSF9	Intron (XM_012097912.1/SRSF9, intron 2 of 4)
15219	V15219	0.48375199	10.94616601	1.01E-26	1.03E-26	0.692487662	432	cg09881550	chr8	37268748	37268798	PRDM13	Promoter (<=1kb)
5869	V5869	0.483707589	10.94496404	1.02E-26	1.04E-26	0.676285036	432	cg02468520	chr2	85208431	85208481	CNTLN	Intron (XM_015093231.1/CNTLN, intron 9 of 26)
2485	V2485	0.483688359	10.94444347	1.03E-26	1.05E-26	0.681581153	432	cg25359492	chr11	27109866	27109916	CHD3	Exon (XM_015098627.1/CHD3, exon 40 of 43)
36492	V36492	0.483685656	10.94437032	1.03E-26	1.05E-26	0.687063507	432	cg26881112	chr20	44504466	44504516	TFAP2A	Distal Intergenic
26851	V26851	0.483685035	10.9443535	1.03E-26	1.05E-26	0.675633206	432	cg19145110	chr1	12755845	12755895	LOC105603815	Distal Intergenic
36304	V36304	0.483684023	10.94432611	1.03E-26	1.05E-26	0.673747556	432	cg26717518	chr3	9992946	9992996	TRNAC-ACA	Distal Intergenic
23542	V23542	0.483558598	10.94093122	1.06E-26	1.08E-26	0.695397616	432	cg16495386	chr11	62042755	62042805	HELZ	Exon (XM_004013156.2/HELZ, exon 9 of 34)
11881	V11881	0.483529668	10.94014824	1.07E-26	1.09E-26	0.677262781	432	cg07219649	chr5	85537406	85537456	MEF2C	Exon (XM_012177548.2/MEF2C, exon 8 of 11)
15379	V15379	0.483511221	10.939649	1.08E-26	1.09E-26	0.651049912	432	cg10018321	chr10	46877354	46877404	DACH1	Intron (XM_012184753.2/DACH1, intron 1 of 11)
36438	V36438	0.483480136	10.93880774	1.09E-26	1.10E-26	0.662747928	432	cg26828604	chr3	68274220	68274270	PPP4R3B	Exon (XM_004005937.3/PPP4R3B, exon 13 of 16)
22705	V22705	0.483429996	10.93745088	1.10E-26	1.12E-26	0.684153552	432	cg15813117	chr3	45039253	45039303	EHBP1	Intron (XM_004005849.3/EHBP1, intron 21 of 25)
24761	V24761	0.483374778	10.93595671	1.12E-26	1.13E-26	0.671989943	432	cg17443147	chr14	37502404	37502454	ZFHX3	Intron (XM_015100188.1/ZFHX3, intron 4 of 14)
5136	V5136	0.483366541	10.93573382	1.12E-26	1.13E-26	0.683862557	432	cg01924571	chr8	58813465	58813515	TCF21	Distal Intergenic
11004	V11004	0.483347777	10.9352261	1.13E-26	1.14E-26	0.70408092	432	cg06562958	chr2	134774614	134774664	OLA1	Intron (XM_012133444.2/OLA1, intron 5 of 10)
13843	V13843	0.483315776	10.93436023	1.14E-26	1.15E-26	0.667392215	432	cg08826468	chr24	26849414	26849464	SRCAP	Exon (XM_004020909.3/SRCAP, exon 14 of 36)
18053	V18053	0.483311401	10.93424187	1.14E-26	1.15E-26	0.685713288	432	cg12212178	chr15	60373568	60373618	IMMP1L	5' UTR
15402	V15402	0.483286011	10.9335549	1.15E-26	1.16E-26	0.671838626	432	cg10042751	chr2	144997690	144997740	FIGN	Distal Intergenic
18845	V18845	0.483282685	10.93346492	1.15E-26	1.16E-26	0.681429835	432	cg12847291	chr1	36333630	36333680	NFIA	3' UTR
10386	V10386	0.483234785	10.93216898	1.16E-26	1.17E-26	0.668707515	432	cg06078629
37417	V37417	0.483215569	10.93164913	1.17E-26	1.18E-26	0.678310364	432	cg27632562	chr13	60870042	60870092	TM9SF4	Exon (XM_012189030.1/TM9SF4, exon 11 of 20)
22690	V22690	0.483205863	10.93138656	1.17E-26	1.18E-26	0.679334668	432	cg15804249	chr7	14210412	14210462	MAP2K5	Intron (XM_012180834.2/MAP2K5, intron 7 of 17)
24576	V24576	0.483192117	10.9310147	1.18E-26	1.19E-26	0.693151131	432	cg17299060	chr6	69454390	69454440	CHIC2	Intron (XM_004009829.2/CHIC2, intron 3 of 5)
18567	V18567	0.483180219	10.93069283	1.18E-26	1.19E-26	0.67281637	432	cg12617092	chr12	63751648	63751698	EDEM3	3' UTR
25757	V25757	0.483177578	10.93062137	1.18E-26	1.19E-26	0.676494553	432	cg18264421
12615	V12615	0.483167763	10.93035585	1.18E-26	1.19E-26	0.690567092	432	cg07829577	chr18	40572454	40572504	HECTD1	Exon (XM_012098773.2/HECTD1, exon 37 of 42)
20814	V20814	0.48314035	10.92961429	1.19E-26	1.20E-26	0.67791461	432	cg14381517	chr2	148353280	148353330	LOC101109676	Distal Intergenic
27915	V27915	0.483124907	10.92919656	1.20E-26	1.20E-26	0.68687727	432	cg19959167	chr1	42178844	42178894	MIER1	Exon (XM_015092045.1/MIER1, exon 14 of 15)
27642	V27642	0.483116221	10.92896161	1.20E-26	1.21E-26	0.684491107	432	cg19744965	chr22	31953495	31953545	VTI1A	Intron (XM_012102940.2/VTI1A, intron 4 of 7)
26601	V26601	0.483098297	10.92847677	1.21E-26	1.21E-26	0.663423038	432	cg18940406
35462	V35462	0.483075317	10.92785519	1.22E-26	1.22E-26	0.67029053	432	cg26047375	chr9	84352030	84352080	TRNAS-AGA	Distal Intergenic
7184	V7184	0.483071972	10.92776471	1.22E-26	1.22E-26	0.672001583	432	cg03532626	chr19	13797430	13797480	CTNNB1	Exon (XM_015102079.1/CTNNB1, exon 5 of 16)
37291	V37291	0.483044837	10.92703076	1.23E-26	1.23E-26	0.653354595	432	cg27521727	chrX	45507966	45508016	ZC3H12B	Exon (XM_004022034.3/ZC3H12B, exon 7 of 7)
29099	V29099	0.483038697	10.92686468	1.23E-26	1.23E-26	0.683839277	432	cg20900721	chr2	35582436	35582486	HNRNPK	Intron (XM_004004108.3/HNRNPK, intron 5 of 16)
28363	V28363	0.482984254	10.92539222	1.25E-26	1.25E-26	0.691288761	432	cg20305611	chr3	125687687	125687737	ATP2B1	3' UTR
37427	V37427	0.482977924	10.925221	1.25E-26	1.25E-26	0.650398082	432	cg27640306	chr4	25210948	25210998	BZW2	Exon (XM_004007770.3/BZW2, exon 2 of 12)
34359	V34359	0.482967891	10.92494966	1.25E-26	1.25E-26	0.664261104	432	cg25174758	chr15	25154517	25154567	CADM1	3' UTR
34839	V34839	0.482966731	10.92491829	1.25E-26	1.25E-26	0.676285036	432	cg25563495	chr1	18667306	18667356	ERI3	Intron (XM_012121196.2/ERI3, intron 6 of 7)
18059	V18059	0.48289748	10.9230455	1.28E-26	1.28E-26	0.680615048	432	cg12214761	chr2	152180758	152180808	NR4A2	Exon (XM_004004686.2/NR4A2, exon 3 of 8)
35998	V35998	0.482884351	10.92269046	1.28E-26	1.28E-26	0.676541112	432	cg26455630	chr4	9599330	9599380	ANKIB1	Exon (XM_004007711.3/ANKIB1, exon 15 of 20)
34458	V34458	0.482881946	10.92262543	1.28E-26	1.28E-26	0.677146382	432	cg25269791	chr3	181630112	181630162	DNM1L	Exon (XM_015094867.1/DNM1L, exon 22 of 22)
15932	V15932	0.482814194	10.92079336	1.30E-26	1.30E-26	0.661001955	432	cg10491932	chr5	89473026	89473076	LOC101121262	Distal Intergenic
31177	V31177	0.482780083	10.91987102	1.32E-26	1.31E-26	0.676482913	432	cg22557786
21152	V21152	0.482755433	10.91920453	1.33E-26	1.32E-26	0.688332247	432	cg14621998	chr1	69428326	69428376	MTF2	5' UTR
14827	V14827	0.482746787	10.91897077	1.33E-26	1.32E-26	0.68683071	432	cg09578613	chr16	37100481	37100531	NIPBL	Exon (XM_004017042.3/NIPBL, exon 45 of 47)
36582	V36582	0.482744579	10.91891106	1.33E-26	1.32E-26	0.68048701	432	cg26954891	chr11	12472233	12472283	GGNBP2	Exon (XM_012185257.2/GGNBP2, exon 14 of 14)
14079	V14079	0.482718212	10.9181982	1.34E-26	1.33E-26	0.686097402	432	cg09002775	chr14	25390831	25390881	CSNK2A2	Exon (XM_015100179.1/CSNK2A2, exon 4 of 11)
33773	V33773	0.482646781	10.91626703	1.37E-26	1.36E-26	0.674224788	432	cg24676367	chr1	214338633	214338683	TNIK	Exon (XM_012099241.2/TNIK, exon 33 of 33)
9995	V9995	0.482645763	10.91623951	1.37E-26	1.36E-26	0.688832759	432	cg05769662	chr15	28600097	28600147	KMT2A	Promoter (<=1kb)
35299	V35299	0.482610925	10.91529772	1.38E-26	1.37E-26	0.667869448	432	cg25912670	chr7	27707316	27707366	LOC105615667	Distal Intergenic
22250	V22250	0.482579373	10.9144448	1.39E-26	1.38E-26	0.691684514	432	cg15447133	chr1	235597539	235597589	TSC22D2	Exon (XM_004003260.3/TSC22D2, exon 3 of 5)
22305	V22305	0.482529916	10.91310796	1.41E-26	1.40E-26	0.710052146	432	cg15503346	chr5	85477640	85477690	LOC101105819	Intron (XR_001040782.2/LOC101105819, intron 1 of 3)
16270	V16270	0.48252372	10.91294047	1.41E-26	1.40E-26	0.673316882	432	cg10746804	chr14	41181560	41181610	LOC106991602	Exon (XR_001435707.1/LOC106991602, exon 2 of 2)
4013	V4013	0.482519395	10.91282357	1.41E-26	1.40E-26	0.687179905	432	cg01029944	chr4	98936191	98936241	CNOT4	Exon (XM_012177185.2/CNOT4, exon 10 of 11)
17205	V17205	0.482516885	10.91275572	1.42E-26	1.40E-26	0.666635627	432	cg11514271	chr15	56601773	56601823	BDNF	Distal Intergenic
2901	V2901	0.482509939	10.91256797	1.42E-26	1.40E-26	0.658220039	432	cg00130134	chr25	4085875	4085925	EGLN1	Exon (XM_015104286.1/EGLN1, exon 5 of 7)
37264	V37264	0.482442593	10.91074773	1.44E-26	1.43E-26	0.691044324	432	cg27504082	chr2	71030357	71030407	RFX3	3' UTR
22174	V22174	0.482344821	10.90810542	1.48E-26	1.46E-26	0.70344073	432	cg15385409	chr8	37270693	37270743	PRDM13	Promoter (2-3kb)
2998	V2998	0.482341262	10.90800925	1.48E-26	1.46E-26	0.673735916	432	cg00205619	chr20	35807107	35807157	CDKAL1	Intron (XM_015102823.1/CDKAL1, intron 8 of 13)
17153	V17153	0.482340651	10.90799273	1.48E-26	1.46E-26	0.670709563	432	cg11462657	chrX	42011279	42011329	KDM6A	Exon (XM_015104862.1/KDM6A, exon 18 of 31)
19172	V19172	0.482326342	10.90760606	1.49E-26	1.47E-26	0.687168265	432	cg13091892	chr19	30494398	30494448	FOXP1	5' UTR
11727	V11727	0.482302373	10.90695836	1.50E-26	1.48E-26	0.690753329	432	cg07091001
16451	V16451	0.482273922	10.90618956	1.51E-26	1.49E-26	0.669557221	432	cg10901833	chr2	39121101	39121151	PPP2R2A	Exon (XM_004004173.3/PPP2R2A, exon 10 of 10)
34311	V34311	0.48227267	10.90615572	1.51E-26	1.49E-26	0.687889934	432	cg25133517	chr22	21680224	21680274	MGEA5	Intron (XM_015103386.1/MGEA5, intron 11 of 16)
23368	V23368	0.482221667	10.90477762	1.53E-26	1.51E-26	0.682617097	432	cg16343538	chr18	40577513	40577563	HECTD1	Exon (XM_012098773.2/HECTD1, exon 31 of 42)
16498	V16498	0.482197175	10.90411585	1.54E-26	1.52E-26	0.673968712	432	cg10935025	chr2	136937842	136937892	DYNC1I2	Exon (XM_012133845.1/DYNC1I2, exon 5 of 17)
14627	V14627	0.482188663	10.90388586	1.55E-26	1.52E-26	0.678426762	432	cg09426590	chr16	37139984	37140034	NIPBL	Exon (XM_004017042.3/NIPBL, exon 27 of 47)
31125	V31125	0.48215547	10.90298908	1.56E-26	1.53E-26	0.673014247	432	cg22515758	chr19	17096062	17096112	SETD5	5' UTR
18372	V18372	0.482147323	10.90276896	1.56E-26	1.53E-26	0.665553124	432	cg12458581	chr9	2862031	2862081	OGFRL1	Exon (XM_015097622.1/OGFRL1, exon 7 of 12)
27156	V27156	0.482143577	10.90266776	1.57E-26	1.53E-26	0.674306267	432	cg19390002	chr15	36026135	36026185	SOX6	3' UTR
5146	V5146	0.482134467	10.90242162	1.57E-26	1.54E-26	0.688017972	432	cg01932125	chr21	17670610	17670660	RSF1	3' UTR
24437	V24437	0.482128812	10.90226884	1.57E-26	1.54E-26	0.720702579	432	cg17183951	chr10	75981347	75981397	LOC105616228	Intron (XR_001043211.2/LOC105616228, intron 3 of 3)
29194	V29194	0.482117499	10.90196324	1.58E-26	1.54E-26	0.67093072	432	cg20971724	chr14	25710843	25710893	CNOT1	Exon (XM_004015040.2/CNOT1, exon 2 of 49)
17260	V17260	0.482060612	10.90042642	1.60E-26	1.57E-26	0.712612906	432	cg11552971	chr8	85450107	85450157	QKI	5' UTR
25117	V25117	0.48205627	10.90030912	1.60E-26	1.57E-26	0.676552752	432	cg17731968	chr7	8667517	8667567	TBCA	Intron (XM_015096795.1/TBCA, intron 1 of 3)
26283	V26283	0.482044288	10.89998545	1.61E-26	1.57E-26	0.678217246	432	cg18685260	chr4	68041871	68041921	JAZF1	Intron (XM_015095333.1/JAZF1, intron 1 of 4)
31429	V31429	0.48198935	10.89850143	1.63E-26	1.60E-26	0.654402179	432	cg22776920	chr8	58695771	58695821	EYA4	Exon (XM_012182929.2/EYA4, exon 19 of 20)
35226	V35226	0.481949371	10.89742155	1.65E-26	1.61E-26	0.716733402	432	cg25854701	chr1	67245064	67245114	BARHL2	Promoter (1-2kb)
11060	V11060	0.481946835	10.89735307	1.65E-26	1.61E-26	0.685911165	432	cg06605797	chr11	35057388	35057438	MBTD1	Exon (XM_012185843.2/MBTD1, exon 15 of 18)
10591	V10591	0.481933688	10.89699795	1.66E-26	1.62E-26	0.689775584	432	cg06245192	chr10	69620432	69620482	LOC105616207	Distal Intergenic
27902	V27902	0.48192985	10.8968943	1.66E-26	1.62E-26	0.675737964	432	cg19949384	chr4	52783229	52783279	TFEC	Distal Intergenic
35923	V35923	0.481894749	10.89594627	1.68E-26	1.63E-26	0.667531893	432	cg26394231	chr2	234545724	234545774	KHDRBS1	3' UTR
17755	V17755	0.481885233	10.89568924	1.68E-26	1.64E-26	0.694024118	432	cg11970445	chr15	24161561	24161611	ZBTB16	Intron (XM_012096530.2/ZBTB16, intron 5 of 7)
8761	V8761	0.481831695	10.89424333	1.71E-26	1.66E-26	0.678857436	432	cg04774357	chr9	74555256	74555306	UBR5	Intron (XM_015097892.1/UBR5, intron 8 of 58)
8234	V8234	0.481811188	10.89368952	1.71E-26	1.67E-26	0.701601639	432	cg04363039	chr7	8936564	8936614	AP3B1	Intron (XM_012180683.2/AP3B1, intron 25 of 26)
19727	V19727	0.481808113	10.89360649	1.72E-26	1.67E-26	0.657393612	432	cg13509896	chr1	120559037	120559087	LOC105609265	Distal Intergenic
5308	V5308	0.481799495	10.89337377	1.72E-26	1.67E-26	0.688204209	432	cg02042105	chr3	84988998	84989048	ARHGEF33	3' UTR
14384	V14384	0.481792789	10.89319267	1.72E-26	1.67E-26	0.680277493	432	cg09235324	chr3	90494850	90494900	LTBP1	Exon (XM_015094442.1/LTBP1, exon 18 of 40)
16442	V16442	0.481778376	10.89280343	1.73E-26	1.68E-26	0.666519229	432	cg10894546	chr5	85872068	85872118	LOC105615321	Distal Intergenic
10725	V10725	0.481725062	10.89136378	1.76E-26	1.70E-26	0.659919452	432	cg06360539	chr1	215150187	215150237	PHC3	Exon (XM_012099500.2/PHC3, exon 14 of 15)
23979	V23979	0.481718229	10.89117926	1.76E-26	1.71E-26	0.679311388	432	cg16831375	chr3	85613912	85613962	ATL2	Exon (XM_015094430.1/ATL2, exon 12 of 14)
30799	V30799	0.481710058	10.89095863	1.76E-26	1.71E-26	0.682163144	432	cg22247803	chrX	28471008	28471058	DMD	Exon (XM_004021987.3/DMD, exon 9 of 16)
11368	V11368	0.481676124	10.89004236	1.78E-26	1.72E-26	0.687622218	432	cg06813117	chr1	238860613	238860663	ZIC1	Promoter (<=1kb)
8140	V8140	0.481654708	10.88946413	1.79E-26	1.73E-26	0.68815765	432	cg04291050	chr2	134580978	134581028	SP9	Exon (XM_015092810.1/SP9, exon 10 of 10)
15684	V15684	0.481630124	10.88880034	1.80E-26	1.74E-26	0.674795139	432	cg10276283	chr1	90093839	90093889	LOC105615308	Exon (XR_001433783.1/LOC105615308, exon 2 of 3)
34160	V34160	0.481618256	10.88847992	1.81E-26	1.75E-26	0.678450042	432	cg25018297	chr25	30547526	30547576	KAT6B	Exon (XM_015104456.1/KAT6B, exon 12 of 18)
27441	V27441	0.481600033	10.88798792	1.82E-26	1.76E-26	0.68686563	432	cg19604134	chr11	24229669	24229719	ZZEF1	Exon (XM_012185517.2/ZZEF1, exon 25 of 54)
20836	V20836	0.481592653	10.88778869	1.82E-26	1.76E-26	0.69323261	432	cg14397495
21098	V21098	0.481579201	10.88742551	1.83E-26	1.76E-26	0.669976255	432	cg14574905	chr2	185673853	185673903	CLASP1	Intron (XM_012140433.1/CLASP1, intron 22 of 39)
1292	V1292	0.481574328	10.88729393	1.83E-26	1.77E-26	0.682011826	432	cg12717057	chr13	69570815	69570865	CHD6	Exon (XM_015099499.1/CHD6, exon 18 of 39)
4487	V4487	0.481563961	10.88701406	1.83E-26	1.77E-26	0.677821492	432	cg01405801	chr19	30457782	30457832	FOXP1	Intron (XM_015102109.1/FOXP1, intron 6 of 17)
20070	V20070	0.481563367	10.88699803	1.83E-26	1.77E-26	0.664156346	432	cg13782531	chr11	38360390	38360440	NPEPPS	Exon (XM_012185997.2/NPEPPS, exon 9 of 23)
6887	V6887	0.481529877	10.88609391	1.85E-26	1.78E-26	0.686667753	432	cg03273505	chr2	164408585	164408635	ZEB2	Promoter (9-10kb)
9437	V9437	0.481518101	10.885776	1.86E-26	1.79E-26	0.695583853	432	cg05310717	chr1	227368637	227368687	SHOX2	Exon (XM_015092577.1/SHOX2, exon 5 of 8)
9768	V9768	0.48149411	10.88512835	1.87E-26	1.80E-26	0.699180557	432	cg05578628	chr25	38928336	38928386	CCSER2	3' UTR
5741	V5741	0.481490897	10.88504164	1.87E-26	1.80E-26	0.702381507	432	cg02354041	chr3	10216289	10216339	PBX3	Intron (XM_012162805.2/PBX3, intron 4 of 10)
20736	V20736	0.481483236	10.88483481	1.87E-26	1.80E-26	0.672595214	432	cg14318001	chr7	78384675	78384725	SRSF5	Intron (XM_012181923.2/SRSF5, intron 6 of 8)
17265	V17265	0.481440882	10.88369152	1.90E-26	1.82E-26	0.698796443	432	cg11560663	chr5	14332925	14332975	ELAVL1	3' UTR
36324	V36324	0.48142886	10.88336702	1.90E-26	1.83E-26	0.678112487	432	cg26727940	chr2	234545328	234545378	KHDRBS1	3' UTR
16788	V16788	0.481417793	10.8830683	1.91E-26	1.83E-26	0.677542136	432	cg11166378	chr3	183333341	183333391	IPO8	Intron (XM_012175076.2/IPO8, intron 1 of 23)
25863	V25863	0.481308185	10.88010993	1.97E-26	1.89E-26	0.682605457	432	cg18343911	chr13	69598483	69598533	CHD6	Exon (XM_015099499.1/CHD6, exon 9 of 39)
16336	V16336	0.481297277	10.87981555	1.97E-26	1.89E-26	0.676890306	432	cg10799141	chrX	18899167	18899217	CNKSR2	3' UTR
7129	V7129	0.48127938	10.87933255	1.98E-26	1.90E-26	0.690264457	432	cg03483643	chr22	17442191	17442241	LOC101112525	Exon (XM_015103352.1/LOC101112525, exon 7 of 7)
32067	V32067	0.481245995	10.87843159	2.00E-26	1.92E-26	0.674376106	432	cg23272565	chr22	47834275	47834325	MGMT	Intron (XM_015103292.1/MGMT, intron 2 of 4)
16514	V16514	0.481221263	10.87776415	2.01E-26	1.93E-26	0.65243505	432	cg10951023	chrX	60792677	60792727	OGT	Intron (XM_004022177.3/OGT, intron 4 of 21)
13744	V13744	0.48121764	10.8776664	2.01E-26	1.93E-26	0.683827638	432	cg08738827	chr21	43886831	43886881	RBM4B	3' UTR
14751	V14751	0.481160913	10.87613563	2.05E-26	1.96E-26	0.656066673	432	cg09531545	chr1	37911767	37911817	ATG4C	Distal Intergenic
877	V877	0.481129521	10.87528858	2.06E-26	1.97E-26	0.687889934	432	cg08486684	chr2	183123076	183123126	EN1	Promoter (<=1kb)
8698	V8698	0.481122405	10.87509659	2.07E-26	1.98E-26	0.708096657	432	cg04713304	chr15	43756948	43756998	LMO1	Intron (XM_015101044.1/LMO1, intron 1 of 3)
35526	V35526	0.481099368	10.87447501	2.08E-26	1.99E-26	0.661805103	432	cg26097619	chr13	79566237	79566287	LOC105608649	Distal Intergenic
28085	V28085	0.481083074	10.87403536	2.09E-26	2.00E-26	0.682337741	432	cg20092403	chr7	65823768	65823818	TMEM260	Distal Intergenic
14659	V14659	0.481055086	10.87328023	2.11E-26	2.01E-26	0.665064252	432	cg09451873	chr2	163556012	163556062	LOC105609180	Distal Intergenic
7999	V7999	0.481030611	10.87261991	2.12E-26	2.02E-26	0.673247043	432	cg04173950	chr2	9749082	9749132	ZNF618	Intron (XM_012112514.1/ZNF618, intron 2 of 17)
31777	V31777	0.480999639	10.87178432	2.14E-26	2.04E-26	0.681336717	432	cg23050114	chr14	35978038	35978088	NFAT5	Promoter (<=1kb)
32625	V32625	0.480980059	10.87125611	2.15E-26	2.05E-26	0.680638328	432	cg23720268	chr15	53887534	53887584	EMSY	Distal Intergenic
29391	V29391	0.480959959	10.87071387	2.16E-26	2.06E-26	0.675435329	432	cg21137565	chr2	230990444	230990494	TRIP12	Promoter (<=1kb)
26286	V26286	0.480944736	10.87030322	2.17E-26	2.07E-26	0.686365118	432	cg18687363	chr11	19868470	19868520	PHF12	3' UTR
3052	V3052	0.480939665	10.8701664	2.17E-26	2.07E-26	0.67154763	432	cg00251385	chr11	13129197	13129247	ACACA	Intron (NM_001009256.1/ACACA, intron 25 of 57)
27860	V27860	0.480937803	10.87011617	2.17E-26	2.07E-26	0.66584412	432	cg19911083	chr11	46328127	46328177	TLK2	Exon (XM_015098857.1/TLK2, exon 6 of 22)
29567	V29567	0.480920297	10.86964395	2.18E-26	2.08E-26	0.671978303	432	cg21252537	chr15	38498138	38498188	FAR1	Exon (XM_012095716.2/FAR1, exon 6 of 11)
34735	V34735	0.480919106	10.8696118	2.18E-26	2.08E-26	0.680300773	432	cg25485747	chr25	32048473	32048523	C25H10orf11	Intron (XM_012105396.2/C25H10orf11, intron 6 of 6)
19512	V19512	0.48089727	10.86902278	2.20E-26	2.09E-26	0.645555918	432	cg13345581	chr12	19753048	19753098	LOC101121364	Distal Intergenic
35092	V35092	0.480879569	10.86854533	2.21E-26	2.10E-26	0.684770463	432	cg25743630	chr19	17096285	17096335	SETD5	5' UTR
15275	V15275	0.480858072	10.86796546	2.22E-26	2.11E-26	0.671279914	432	cg09922578	chr25	29228167	29228217	PPP3CB	Exon (XM_012105304.2/PPP3CB, exon 8 of 15)
6800	V6800	0.480834092	10.86731866	2.24E-26	2.12E-26	0.663935189	432	cg03208781	chr14	38149227	38149277	PMFBP1	Distal Intergenic
22350	V22350	0.480820632	10.86695559	2.24E-26	2.13E-26	0.672048142	432	cg15539292	chr1	110539086	110539136	DEDD	Exon (XM_012184730.2/DEDD, exon 6 of 7)
17474	V17474	0.480777676	10.86579701	2.27E-26	2.15E-26	0.704220598	432	cg11731532	chr5	91386868	91386918	MCTP1	Intron (XM_012178961.1/MCTP1, intron 19 of 23)
14467	V14467	0.480769465	10.86557556	2.28E-26	2.16E-26	0.681522954	432	cg09307266	chr8	61234800	61234850	BCLAF1	3' UTR
19161	V19161	0.480734275	10.86462651	2.30E-26	2.18E-26	0.690497253	432	cg13084728	chr12	77180446	77180496	ZNF281	3' UTR
18344	V18344	0.480714821	10.86410184	2.31E-26	2.19E-26	0.679602384	432	cg12441103	chr15	36375083	36375133	LOC105602230	Distal Intergenic
26358	V26358	0.480703736	10.8638029	2.32E-26	2.19E-26	0.68492178	432	cg18744652	chr2	159970946	159970996	MBD5	Exon (XM_015093425.1/MBD5, exon 7 of 13)
3069	V3069	0.480691929	10.86348449	2.32E-26	2.20E-26	0.659954372	432	cg00261096	chr2	47301906	47301956	TEX10	Exon (XM_015093124.1/TEX10, exon 3 of 17)
2918	V2918	0.480691509	10.86347316	2.32E-26	2.20E-26	0.704371915	432	cg00146676	chr6	13158247	13158297	NEUROG2	Promoter (5-6kb)
14978	V14978	0.480681214	10.86319554	2.33E-26	2.20E-26	0.692697179	432	cg09679440	chr6	37285119	37285169	LCORL	3' UTR
8926	V8926	0.480675583	10.86304368	2.33E-26	2.20E-26	0.687156625	432	cg04914580	chr1	220069377	220069427	SLITRK3	Exon (XM_004003193.3/SLITRK3, exon 2 of 2)
6566	V6566	0.480619764	10.86153846	2.37E-26	2.24E-26	0.683967315	432	cg03013117	chr19	43385286	43385336	SLMAP	Exon (XM_012099840.2/SLMAP, exon 14 of 24)
21694	V21694	0.480600755	10.86102589	2.38E-26	2.25E-26	0.696107645	432	cg15024034	chr8	73659932	73659982	LATS1	Exon (XM_004011406.3/LATS1, exon 5 of 8)
2985	V2985	0.480598733	10.86097136	2.38E-26	2.25E-26	0.686295279	432	cg00197325	chr10	54083433	54083483	POU4F1	Distal Intergenic
5110	V5110	0.480590213	10.86074161	2.39E-26	2.25E-26	0.67728606	432	cg01901707	chr5	67951314	67951364	EBF1	Intron (XM_012178873.2/EBF1, intron 4 of 15)
33179	V33179	0.480590035	10.86073682	2.39E-26	2.25E-26	0.649560015	432	cg24199085	chr1	165672993	165673043	TRNAW-CCA	Distal Intergenic
29485	V29485	0.480544802	10.85951718	2.42E-26	2.28E-26	0.690776609	432	cg21201513	chr1	36333677	36333727	NFIA	3' UTR
31404	V31404	0.480535081	10.85925507	2.42E-26	2.28E-26	0.662922525	432	cg22756585	chr14	35977976	35978026	NFAT5	Exon (XM_015100522.1/NFAT5, exon 3 of 13)
29334	V29334	0.480520404	10.85885935	2.43E-26	2.29E-26	0.672374057	432	cg21091297	chr3	192091654	192091704	ETNK1	Intron (XM_012175197.1/ETNK1, intron 4 of 7)
13201	V13201	0.480510605	10.85859514	2.44E-26	2.30E-26	0.686004283	432	cg08316250	chr4	8534024	8534074	CDK14	Intron (XM_012176290.2/CDK14, intron 14 of 14)
31590	V31590	0.480504878	10.85844075	2.44E-26	2.30E-26	0.684607505	432	cg22902874	chr3	175703479	175703529	BTBD11	Exon (XM_015093958.1/BTBD11, exon 8 of 18)
23942	V23942	0.480438748	10.85665785	2.49E-26	2.34E-26	0.656299469	432	cg16797109	chr3	136987276	136987326	DDX23	Exon (XM_004006391.2/DDX23, exon 9 of 17)
613	V613	0.480404934	10.85574628	2.51E-26	2.36E-26	0.639200577	432	cg05932603	chr1	42122305	42122355	MIER1	5' UTR
8874	V8874	0.480386854	10.85525888	2.52E-26	2.37E-26	0.680149455	432	cg04868728	chr10	28659279	28659329	PDS5B	Exon (XM_015098132.1/PDS5B, exon 3 of 35)
34019	V34019	0.480303609	10.85301493	2.58E-26	2.42E-26	0.66137443	432	cg24901230	chr2	73577808	73577858	KIAA2026	Exon (XM_015093204.1/KIAA2026, exon 4 of 7)
24582	V24582	0.480273545	10.85220458	2.60E-26	2.44E-26	0.686062483	432	cg17309452	chr16	35416102	35416152	RICTOR	Exon (XM_004017028.3/RICTOR, exon 34 of 38)
18330	V18330	0.480216255	10.85066045	2.64E-26	2.48E-26	0.659104665	432	cg12425407	chr18	41989502	41989552	AKAP6	Intron (XM_004017884.2/AKAP6, intron 10 of 13)
23288	V23288	0.480212276	10.85055322	2.65E-26	2.48E-26	0.65499581	432	cg16283106	chr10	74689395	74689445	FARP1	Intron (XM_015098245.1/FARP1, intron 13 of 26)
8645	V8645	0.480188751	10.84991919	2.66E-26	2.49E-26	0.652993761	432	cg04676354	chr13	17831359	17831409	PARD3	Exon (XM_015099560.1/PARD3, exon 15 of 23)
11954	V11954	0.480172218	10.8494736	2.67E-26	2.50E-26	0.676168638	432	cg07266482	chr3	79372989	79373039	CAMKMT	Intron (XM_004007290.3/CAMKMT, intron 6 of 11)
28637	V28637	0.480158199	10.84909582	2.68E-26	2.51E-26	0.678694478	432	cg20510807	chr15	24161643	24161693	ZBTB16	Intron (XM_012096530.2/ZBTB16, intron 5 of 7)
25546	V25546	0.480157909	10.849088	2.68E-26	2.51E-26	0.657801006	432	cg18085060	chr25	24798014	24798064	CCAR1	Exon (XM_012105193.2/CCAR1, exon 14 of 25)
21091	V21091	0.480155161	10.84901392	2.69E-26	2.51E-26	0.685829686	432	cg14569995	chr3	73531785	73531835	LOC105612039	Exon (XM_015094031.1/NRXN1, exon 7 of 23)
22154	V22154	0.480130991	10.84836256	2.70E-26	2.52E-26	0.676319955	432	cg15369693	chr19	30398945	30398995	FOXP1	Intron (XM_015102109.1/FOXP1, intron 5 of 17)
30933	V30933	0.480027851	10.84558326	2.78E-26	2.59E-26	0.6900433	432	cg22362271	chr4	68514328	68514378	HIBADH	Intron (XM_004008248.2/HIBADH, intron 6 of 9)
17238	V17238	0.480015968	10.84526305	2.79E-26	2.60E-26	0.659605177	432	cg11534866	chr2	151652281	151652331	TRNAC-GCA	Distal Intergenic
18563	V18563	0.479961901	10.84380626	2.83E-26	2.64E-26	0.685247695	432	cg12614110	chr3	195031211	195031261	AEBP2	Exon (XM_015094908.1/AEBP2, exon 9 of 13)
30553	V30553	0.479925873	10.84283557	2.86E-26	2.66E-26	0.676087159	432	cg22033193	chr2	164413905	164413955	ZEB2	Promoter (3-4kb)
291	V291	0.479919323	10.84265911	2.86E-26	2.66E-26	0.65562436	432	cg02878041	chr11	35603030	35603080	CACNA1G	Exon (XM_015098338.1/CACNA1G, exon 33 of 47)
30200	V30200	0.479918579	10.84263906	2.86E-26	2.66E-26	0.669499022	432	cg21749099	chr4	98964357	98964407	CNOT4	Exon (XM_012177186.2/CNOT4, exon 9 of 10)
11585	V11585	0.479918225	10.84262953	2.86E-26	2.66E-26	0.687424341	432	cg06989214	chr17	52492560	52492610	RSRC2	5' UTR
6578	V6578	0.479913156	10.84249296	2.87E-26	2.67E-26	0.682686935	432	cg03030097	chr1	10445255	10445305	CLSPN	Exon (XM_004001792.3/CLSPN, exon 14 of 25)
33844	V33844	0.479881304	10.84163485	2.89E-26	2.69E-26	0.691393519	432	cg24758605	chr1	227287904	227287954	RSRC1	Intron (XM_012100645.2/RSRC1, intron 3 of 9)
29729	V29729	0.479846366	10.84069362	2.92E-26	2.71E-26	0.678508241	432	cg21385340	chr9	68518668	68518718	EMC2	Exon (XM_012184291.2/EMC2, exon 4 of 10)
29684	V29684	0.479843027	10.84060367	2.92E-26	2.71E-26	0.691137443	432	cg21347683	chr17	61764382	61764432	NAA25	Intron (XM_004017405.3A25, intron 15 of 23)
20541	V20541	0.479834422	10.84037187	2.93E-26	2.72E-26	0.672304218	432	cg14161189	chr12	1577293	1577343	MDM4	Intron (XM_012186936.1/MDM4, intron 5 of 10)
2996	V2996	0.47981534	10.83985782	2.94E-26	2.73E-26	0.648465872	432	cg00204462	chr3	216091063	216091113	EP300	Exon (XM_004007010.3/EP300, exon 20 of 33)
15921	V15921	0.479739394	10.83781207	3.01E-26	2.79E-26	0.675051215	432	cg10485227	chr7	8588438	8588488	OTP	Promoter (<=1kb)
28212	V28212	0.479735697	10.83771248	3.01E-26	2.79E-26	0.685445572	432	cg20189614	chr1	63820647	63820697	LMO4	Distal Intergenic
23575	V23575	0.479730669	10.83757704	3.01E-26	2.79E-26	0.672094702	432	cg16526871	chr5	90946368	90946418	KIAA0825	Intron (XM_012178948.1/KIAA0825, intron 21 of 21)
35314	V35314	0.479689492	10.83646795	3.05E-26	2.82E-26	0.696224043	432	cg25922845	chr2	164520453	164520503	ZEB2	3' UTR
22531	V22531	0.479646624	10.83531338	3.08E-26	2.85E-26	0.718793649	432	cg15682828	chr10	76003124	76003174	ZIC2	Promoter (<=1kb)
26552	V26552	0.479629733	10.83485846	3.10E-26	2.86E-26	0.682070025	432	cg18901929	chr1	37476999	37477049	DOCK7	Exon (XM_012164017.2/DOCK7, exon 13 of 39)
26507	V26507	0.479627718	10.83480419	3.10E-26	2.86E-26	0.681953627	432	cg18872272	chr1	190395439	190395489	ACAP2	Exon (XM_015092490.1/ACAP2, exon 22 of 23)
4877	V4877	0.479554917	10.83284362	3.16E-26	2.92E-26	0.684502747	432	cg01700800	chr5	99385885	99385935	PPIP5K2	Exon (XM_015096227.1/PPIP5K2, exon 26 of 28)
11127	V11127	0.479550099	10.83271388	3.16E-26	2.92E-26	0.689670826	432	cg06648649	chr1	120889949	120889999	PAXBP1	Exon (XM_015092372.1/PAXBP1, exon 9 of 19)
31495	V31495	0.479547503	10.83264396	3.17E-26	2.92E-26	0.690776609	432	cg22821471	chr11	22153612	22153662	CRK	Exon (XM_015098563.1/CRK, exon 4 of 4)
17696	V17696	0.479538188	10.83239313	3.17E-26	2.93E-26	0.707770742	432	cg11922307	chr1	104915929	104915979	MEF2D	Intron (XM_015092302.1/MEF2D, intron 3 of 13)
12428	V12428	0.479534006	10.83228049	3.18E-26	2.93E-26	0.724904553	432	cg07675629	chr3	132223101	132223151	HOXC10	Promoter (<=1kb)
181	V181	0.479524757	10.83203142	3.19E-26	2.93E-26	0.676576031	432	cg01933423	chr7	72666894	72666944	PPP2R5E	Exon (XM_012181792.1/PPP2R5E, exon 1 of 13)
17601	V17601	0.479517176	10.83182729	3.19E-26	2.94E-26	0.690520533	432	cg11838208	chr7	74516537	74516587	FUT8	Exon (XM_012181844.2/FUT8, exon 4 of 12)
15354	V15354	0.479503698	10.83146436	3.20E-26	2.95E-26	0.662957445	432	cg09998202	chr1	203386776	203386826	SOX2	Distal Intergenic
23486	V23486	0.479470339	10.83056608	3.23E-26	2.97E-26	0.650933513	432	cg16454504	chr23	50718893	50718943	SMAD4	Intron (NM_001267886.1/SMAD4, intron 11 of 11)
23378	V23378	0.479457064	10.83020865	3.24E-26	2.98E-26	0.689635907	432	cg16357781	chr12	18996585	18996635	GPATCH2	Intron (XM_004013599.3/GPATCH2, intron 8 of 9)
28344	V28344	0.479400805	10.82869385	3.29E-26	3.03E-26	0.680091256	432	cg20292243	chr26	18017096	18017146	PCM1	Exon (XM_012105796.2/PCM1, exon 6 of 43)
17081	V17081	0.479348535	10.82728655	3.34E-26	3.07E-26	0.683490083	432	cg11406677	chr12	62595664	62595714	SMG7	Exon (XM_015099354.1/SMG7, exon 5 of 23)
4864	V4864	0.479341743	10.82710371	3.35E-26	3.07E-26	0.671489431	432	cg01692291	chr1	243865690	243865740	U2SURP	Exon (XM_012102001.2/U2SURP, exon 13 of 28)
26761	V26761	0.479338968	10.82702899	3.35E-26	3.07E-26	0.672117981	432	cg19079970	chr14	37594187	37594237	ZFHX3	Intron (XM_015100188.1/ZFHX3, intron 8 of 14)
1237	V1237	0.479337364	10.82698583	3.35E-26	3.07E-26	0.69831921	432	cg12231969	chr2	183120731	183120781	EN1	Intron (XM_015092820.1/EN1, intron 1 of 10)
33021	V33021	0.479326097	10.82668248	3.36E-26	3.08E-26	0.672234379	432	cg24056720	chr15	75414965	75415015	CELF1	3' UTR
[truncated: 35,493 more rows]
