# Supplementary material for: Castration delays epigenetic aging and feminises DNA methylation at androgen-regulated loci
Source: bioRxiv preprint, doi:10.1101/2020.11.16.385369, version 1 (2020-11-17)
Supplement: Supplemental Table 3 [file 385369_file04.csv]

CpG ID	p-value	Chromosome	Start	End	Gene Symbol	Annotation
cg21524116	1.05464E-27	chr4	94890709	94890759	MKLN1	Intron (XM_004008073.3/MKLN1, intron 2 of 18)
cg01822430	1.31786E-13	chr3	40547540	40547590	ETAA1	Distal Intergenic
cg05771328	7.94602E-12	chr26	31203876	31203926	LOC105607919	Promoter (2-3kb)
cg15851301	1.62353E-09	chr1	63776218	63776268	LMO4	Distal Intergenic
cg00658920	2.46451E-09	chr2	73617764	73617814	KIAA2026	5' UTR
cg17489709	4.52836E-09	chr19	17096803	17096853	SETD5	5' UTR
cg04968468	4.9702E-09	chr23	45311949	45311999	SLC14A2	Intron (XM_012103628.2/SLC14A2, intron 2 of 20)
cg12129962	6.5937E-09	chr2	163841674	163841724	LOC105609180	Distal Intergenic
cg11082332	1.47452E-08	chr1	63776225	63776275	LMO4	Distal Intergenic
cg03197661	1.6787E-08	chrX	54216899	54216949	RBM10	Exon (XM_012106808.1/RBM10, exon 5 of 23)
cg12863556	2.02382E-08	chr1	63776309	63776359	LMO4	Distal Intergenic
cg03121178	2.1427E-08	chr18	35557047	35557097	NOVA1	Exon (XM_012098747.1/NOVA1, exon 4 of 4)
cg18315252	2.38262E-08	chrX	37358029	37358079	LOC105605432	Distal Intergenic
cg09315446	2.71374E-08	chr12	31317614	31317664	ZBTB18	Distal Intergenic
cg07324453	2.53222E-07	chr24	2276922	2276972	LOC101118752	Promoter (<=1kb)
cg06579027	3.38095E-07	chr3	214755541	214755591	CACNA1I	Exon (XM_015093996.1/CACNA1I, exon 4 of 42)
cg06145973	3.60285E-07	chr12	41022400	41022450	LOC105616615	Intron (XM_012187936.2/LOC105616615, intron 3 of 3)
cg14592546	3.70961E-07	chr23	32034610	32034660	LOC105604449	Distal Intergenic
cg11035838	3.7227E-07
cg20017216	3.74972E-07	chr1	215109514	215109564	PHC3	Intron (XM_012099500.2/PHC3, intron 4 of 14)
cg07158748	5.69715E-07	chr2	216329673	216329723	FN1	Exon (XM_004004906.3/FN1, exon 32 of 45)
cg12357722	5.93482E-07	chr20	9284879	9284929	LOC105603666	Intron (XM_004018765.3/SCUBE3, intron 15 of 21)
cg01090134	7.00362E-07	chr9	84913359	84913409	RUNX1T1	3' UTR
cg12120400	1.17487E-06	chr2	81416491	81416541	LOC101121497	Distal Intergenic
cg08979438	1.23572E-06	chr7	14199815	14199865	MAP2K5	Exon (XM_012180834.2/MAP2K5, exon 5 of 18)
cg01675333	1.50265E-06	chr18	35557745	35557795	NOVA1	Exon (XM_012098747.1/NOVA1, exon 4 of 4)
cg24451994	1.60252E-06	chr12	13195967	13196017	BRINP3	Exon (XM_004013591.2/BRINP3, exon 2 of 8)
cg03032396	1.74027E-06	chr5	90521115	90521165	FAM172A	Intron (XM_012178947.2/FAM172A, intron 8 of 10)
cg19124333	2.00016E-06
cg20424596	2.39323E-06	chr23	23758983	23759033	ASXL3	Exon (XM_015103606.1/ASXL3, exon 7 of 14)
cg06959732	2.88722E-06	chr3	85206969	85207019	SRSF7	Intron (XM_012173447.1/SRSF7, intron 3 of 7)
cg25996664	3.21876E-06	chr3	110662575	110662625	KCNC2	3' UTR
cg03275335	3.41801E-06	chr2	32748385	32748435	GAS1	Distal Intergenic
cg04758190	3.99567E-06	chr11	26709358	26709408	FGF11	Exon (XM_004012656.3/FGF11, exon 2 of 5)
cg12603816	4.45905E-06	chr20	15274821	15274871	LOC105603703	Distal Intergenic
cg21349273	4.70007E-06	chr5	58984225	58984275	SLC6A7	Exon (XM_004008971.2/SLC6A7, exon 5 of 14)
cg22698853	5.06306E-06	chr10	53862340	53862390	POU4F1	Distal Intergenic
cg14319933	5.87543E-06	chr2	213659153	213659203	LOC105611887	Distal Intergenic
cg16080654	6.08277E-06
cg13468491	6.68747E-06	chr5	28126038	28126088	PRDM6	Intron (XM_015095668.1/PRDM6, intron 5 of 9)
cg26112867	6.6927E-06	chrX	54216935	54216985	RBM10	Exon (XM_012106808.1/RBM10, exon 5 of 23)
cg20318153	7.56221E-06	chr11	23815556	23815606	TRPV3	Exon (XM_015098579.1/TRPV3, exon 9 of 14)
cg05072035	7.58143E-06	chr19	43342292	43342342	SLMAP	Exon (XM_012099826.2/SLMAP, exon 23 of 24)
cg04627377	7.71501E-06	chr1	103695041	103695091	ZBTB7B	Exon (XM_012182605.1/ZBTB7B, exon 5 of 5)
cg13296708	8.01743E-06	chr14	40865563	40865613	TSHZ3	Distal Intergenic
cg22489511	8.29507E-06	chr2	73617678	73617728	KIAA2026	Exon (XM_015093204.1/KIAA2026, exon 1 of 7)
cg13869290	9.01722E-06	chr3	97598558	97598608	LOC105612338	Distal Intergenic
cg14411132	1.02507E-05	chr16	14196158	14196208	ADAMTS6	Exon (XM_015101273.1/ADAMTS6, exon 11 of 25)
cg20683822	1.07678E-05	chr2	130211128	130211178	TTN	Exon (XM_012132536.2/TTN, exon 3 of 46)
cg03329528	1.0894E-05	chr12	41012661	41012711	LOC105616615	Promoter (1-2kb)
cg10427592	1.10764E-05	chr14	52037827	52037877	FOSB	Intron (XM_012190549.2/FOSB, intron 1 of 4)
cg05219494	1.11151E-05	chr2	136602480	136602530	DLX1	Distal Intergenic
cg09771641	1.114E-05	chr6	29401680	29401730	BMPR1B	Intron (NM_001009431.1/BMPR1B, intron 1 of 10)
cg05369916	1.14189E-05	chr4	102695879	102695929	LOC101105324	Exon (XM_004008102.2/LOC101105324, exon 10 of 10)
cg12661492	1.23151E-05	chr12	40965628	40965678	CASZ1	Intron (XM_015099220.1/CASZ1, intron 2 of 14)
cg05620664	1.38667E-05	chrX	95460719	95460769	MIR106A	Distal Intergenic
cg27643971	1.43096E-05	chr2	13167461	13167511	LOC101114239	Exon (XM_012113867.2/LOC101114239, exon 4 of 5)
cg15403305	1.43974E-05	chr1	12704130	12704180	LOC105603815	Distal Intergenic
cg25940230	1.45934E-05	chr12	41022444	41022494	LOC105616615	Intron (XM_012187936.2/LOC105616615, intron 3 of 3)
cg15061507	1.56125E-05	chr5	77313593	77313643	LOC101120408	Intron (XM_015095546.1/LOC101120408, intron 5 of 28)
cg13927500	1.592E-05	chr11	20019819	20019869	TIAF1	Downstream (2-3kb)
cg16927935	1.61981E-05	chr15	60525701	60525751	ELP4	Intron (XM_004016368.3/ELP4, intron 9 of 9)
cg15216075	1.62533E-05	chr20	44494565	44494615	TFAP2A	Exon (NM_001009745.1/TFAP2A, exon 11 of 16)
cg17588371	1.66825E-05	chr5	90325296	90325346	NR2F1	Intron (XM_012179315.2/NR2F1, intron 2 of 4)
cg05686124	1.7371E-05	chr7	46418439	46418489	RORA	Intron (XM_015096689.1/RORA, intron 2 of 11)
cg02669060	1.7724E-05	chr1	63776249	63776299	LMO4	Distal Intergenic
cg07184727	1.79995E-05	chr20	23472480	23472530	LOC106991807	Intron (XR_001436375.1/LOC106991807, intron 2 of 2)
cg07102105	1.80939E-05	chr15	60740482	60740532	LOC105602422	Distal Intergenic
cg13704497	1.82848E-05	chr20	26720890	26720940	PRRC2A	Exon (XM_015102789.1/PRRC2A, exon 1 of 35)
cg25654577	1.86591E-05	chr7	47323563	47323613	LOC105610560	Downstream (<1kb)
cg25150443	1.87516E-05	chr8	38435335	38435385	LOC105615867	Distal Intergenic
cg11875079	1.90758E-05	chr18	35555459	35555509	NOVA1	3' UTR
cg14254659	1.92495E-05	chr2	81739897	81739947	LOC101120890	Distal Intergenic
cg02159798	1.93755E-05	chr7	46418392	46418442	RORA	Intron (XM_015096689.1/RORA, intron 2 of 11)
cg08545950	1.98143E-05	chr18	50443593	50443643	LRFN5	Exon (XM_012098859.2/LRFN5, exon 4 of 4)
cg25568354	1.9973E-05	chr5	44107729	44107779	LOC101104574	Exon (XM_015096050.1/LOC101104574, exon 6 of 9)
cg06123051	2.04759E-05	chr2	102390393	102390443	HMBOX1	3' UTR
cg11164048	2.16571E-05	chr15	24120403	24120453	ZBTB16	Intron (XM_012096530.2/ZBTB16, intron 4 of 7)
cg14849852	2.27031E-05	chr22	21332518	21332568	BTRC	Intron (XM_004020119.3/BTRC, intron 2 of 14)
cg01952529	2.2758E-05	chr18	42893001	42893051	NPAS3	Intron (XM_015101805.1/NPAS3, intron 4 of 15)
cg04167324	2.32157E-05	chr7	14078530	14078580	IQCH	Intron (XM_012180817.2/IQCH, intron 18 of 22)
cg19867914	2.42478E-05	chr2	165493822	165493872	ARHGAP15	Intron (XM_004004720.3/ARHGAP15, intron 8 of 13)
cg08441764	2.4367E-05	chr17	54609803	54609853	CUX2	Intron (XM_015101404.1/CUX2, intron 4 of 25)
cg11729436	2.50168E-05	chr20	23112635	23112685	TFAP2B	Distal Intergenic
cg14475919	2.52019E-05	chr4	46295520	46295570	SRPK2	Exon (XR_001039835.2/SRPK2, exon 17 of 18)
cg09369406	2.75262E-05	chr10	11549671	11549721	ELF1	5' UTR
cg03436378	2.82916E-05	chr2	136602761	136602811	DLX1	Distal Intergenic
cg14274584	2.88672E-05	chr2	134936737	134936787	SP3	Exon (XM_012133463.2/SP3, exon 1 of 4)
cg13133981	3.28003E-05	chr5	85345824	85345874	LOC106991172	Distal Intergenic
cg20279791	3.33811E-05	chr12	18533928	18533978	ESRRG	Intron (XM_015099156.1/ESRRG, intron 1 of 9)
cg11411958	3.35094E-05	chr2	47450050	47450100	INVS	Intron (XM_012120186.2/INVS, intron 3 of 16)
cg24561861	3.36913E-05	chr22	43644635	43644685	LOC105604337	Promoter (1-2kb)
cg16130810	3.43593E-05	chr18	61725807	61725857	TRNAS-GGA	Distal Intergenic
cg04926767	3.49081E-05	chr21	40318469	40318519	BSCL2	Promoter (<=1kb)
cg22070544	3.74366E-05	chr7	66091643	66091693	OTX2	Promoter (<=1kb)
cg09998296	3.76682E-05	chr15	60746395	60746445	LOC105602422	Distal Intergenic
cg04833497	3.80814E-05	chr2	164955522	164955572	GTDC1	Intron (XM_012138353.2/GTDC1, intron 6 of 10)
cg15406797	3.90288E-05	chr1	114537982	114538032	PBX1	Intron (XM_012185380.2/PBX1, intron 2 of 9)
cg15651233	3.93063E-05	chr18	9704552	9704602	NR2F2	Promoter (<=1kb)
cg25682789	3.9946E-05	chr5	88628126	88628176	LOC101107352	Distal Intergenic
cg21686258	4.13095E-05	chr9	84057524	84057574	TRNAS-AGA	Distal Intergenic
cg15637759	4.2096E-05	chr3	134252601	134252651	SCN8A	Exon (XM_015094657.1/SCN8A, exon 5 of 28)
cg02731116	4.27472E-05	chr9	84057567	84057617	TRNAS-AGA	Distal Intergenic
cg21791714	4.44297E-05	chr19	29949196	29949246	EIF4E3	3' UTR
cg25304096	4.47202E-05	chr15	36265150	36265200	LOC105602230	Distal Intergenic
cg03401071	4.50822E-05	chr11	31278988	31279038	HS3ST3A1	Intron (XM_015098326.1/HS3ST3A1, intron 2 of 2)
cg21811373	4.59119E-05	chr9	41513335	41513385	LOC101112402	Distal Intergenic
cg04404551	4.63724E-05	chr9	52391993	52392043	LOC105611157	Distal Intergenic
cg16963526	4.66115E-05	chr7	12522946	12522996	RAB11A	Exon (XM_004010248.3/RAB11A, exon 3 of 5)
cg01511856	4.68151E-05	chr15	24120296	24120346	ZBTB16	Intron (XM_012096530.2/ZBTB16, intron 4 of 7)
cg07792339	4.7045E-05	chr21	22621401	22621451	NELL1	Exon (XM_004019441.3/NELL1, exon 16 of 20)
cg10313530	4.79777E-05	chr6	93747601	93747651	GK2	Distal Intergenic
cg18585875	4.79968E-05	chr2	164519232	164519282	ZEB2	Exon (XM_012138277.2/ZEB2, exon 15 of 15)
cg18034053	4.84323E-05	chr24	7740313	7740363	USP7	Intron (XM_004020762.3/USP7, intron 8 of 30)
cg06070445	4.8731E-05	chr1	197667639	197667689	BCL6	Intron (XM_012097363.2/BCL6, intron 1 of 9)
cg22979709	4.89106E-05	chr5	36188795	36188845	NSD1	Exon (XM_012178282.2/NSD1, exon 23 of 23)
cg05482254	4.92641E-05	chr1	228897976	228898026	TIPARP	Intron (XM_004003222.3/TIPARP, intron 2 of 5)
cg15571405	5.01715E-05	chr4	94826071	94826121	MKLN1	Intron (XM_004008073.3/MKLN1, intron 1 of 18)
cg11284212	5.0482E-05	chr17	41527764	41527814	GRIA2	Exon (XM_004017290.3/GRIA2, exon 12 of 17)
cg04472379	5.111E-05	chr5	44107770	44107820	LOC101104574	Exon (XM_015096050.1/LOC101104574, exon 6 of 9)
cg02169632	5.25427E-05	chr13	63991114	63991164	MMP24	Exon (XM_015099849.1/MMP24, exon 10 of 10)
cg07891322	5.38642E-05	chr2	49117386	49117436	GABBR2	Exon (XM_012120473.2/GABBR2, exon 9 of 20)
cg02687104	5.40747E-05	chr22	47217573	47217623	LOC105604346	Distal Intergenic
cg09521449	5.58294E-05
cg18764936	5.68748E-05	chr3	215349149	215349199	TNRC6B	Exon (XM_012175680.2/TNRC6B, exon 7 of 25)
cg07944873	5.75714E-05	chr22	13576872	13576922	IDE	Intron (XM_015103327.1/IDE, intron 16 of 25)
cg04295534	5.90921E-05	chr19	30647913	30647963	FOXP1	Intron (XM_015102109.1/FOXP1, intron 14 of 17)
cg09683967	5.91793E-05	chr4	15511841	15511891	MIOS	Exon (XM_012176377.2/MIOS, exon 3 of 12)
cg01961426	5.91814E-05	chr18	10190370	10190420	LOC105603048	Distal Intergenic
cg17715941	5.92045E-05	chr25	31144078	31144128	C25H10orf11	Intron (XM_012105395.2/C25H10orf11, intron 2 of 5)
cg01272490	6.28217E-05	chr2	136602786	136602836	DLX1	Distal Intergenic
cg26767155	6.3061E-05	chrX	8086632	8086682	MID1	Exon (XM_012106212.2/MID1, exon 2 of 10)
cg21560397	6.6475E-05	chr3	133061605	133061655	SPRYD3	Exon (XM_004006313.3/SPRYD3, exon 2 of 11)
cg18527971	6.67157E-05	chr2	132251462	132251512	LOC105609042	Intron (XR_001434090.1/LOC105609042, intron 4 of 7)
cg24059119	6.70661E-05	chr14	39948205	39948255	ZNF536	Promoter (<=1kb)
cg22906630	6.73286E-05	chr23	54853197	54853247	TCF4	Intron (XM_012103767.2/TCF4, intron 1 of 12)
cg22300018	6.80775E-05	chr18	9419569	9419619	LOC101113177	Distal Intergenic
cg23094811	7.03253E-05	chr3	169702504	169702554	ANO4	Exon (XM_015094821.1/ANO4, exon 8 of 28)
cg08573776	7.05257E-05	chr1	114537656	114537706	PBX1	Intron (XM_012185380.2/PBX1, intron 2 of 9)
cg09699901	7.12769E-05	chr22	36745797	36745847	EMX2	Downstream (1-2kb)
cg21897795	7.46818E-05	chr7	8892619	8892669	LOC105615610	Distal Intergenic
cg02929405	7.53968E-05	chr2	82550535	82550585	TRNAH-GUG	Promoter (<=1kb)
cg03112636	7.54178E-05	chr20	44500821	44500871	TFAP2A	Exon (NM_001009745.1/TFAP2A, exon 15 of 16)
cg20881186	7.55924E-05	chr9	85206742	85206792	LOC105616118	Distal Intergenic
cg16255876	7.58082E-05	chr9	72058370	72058420	ZFPM2	Distal Intergenic
cg15661483	7.61991E-05	chr19	11365868	11365918	CTDSPL	Exon (XM_012100320.1/CTDSPL, exon 3 of 7)
cg15436852	7.77407E-05	chr20	17681360	17681410	TMEM63B	Exon (XM_012100740.2/TMEM63B, exon 21 of 24)
cg19835617	7.97839E-05	chr5	48616572	48616622	PURA	Promoter (<=1kb)
cg08225840	7.99674E-05	chr2	164050597	164050647	LOC105609180	Distal Intergenic
cg18380508	8.069E-05	chr1	138929759	138929809	TRNAS-GGA	Distal Intergenic
cg20897906	8.12576E-05	chr2	182346682	182346732	LOC105609881	Distal Intergenic
cg25668121	8.16176E-05	chr12	75975194	75975244	LOC105613171	Distal Intergenic
cg07344086	8.39663E-05	chr22	40382455	40382505	FGFR2	Exon (XM_012103036.2/FGFR2, exon 7 of 17)
cg08926550	8.40692E-05	chr3	133061608	133061658	SPRYD3	Exon (XM_004006313.3/SPRYD3, exon 2 of 11)
cg25266356	8.4106E-05	chr8	25029551	25029601	RFPL4B	Distal Intergenic
cg00000165	8.44396E-05	chr1	67255053	67255103	BARHL2	Distal Intergenic
cg03477060	8.59654E-05	chr3	63183148	63183198	BCL11A	Distal Intergenic
cg26604767	8.61879E-05	chr1	38286145	38286195	FOXD3	Distal Intergenic
cg10587537	8.68018E-05	chr11	53987606	53987656	SRSF2	3' UTR
cg18945109	8.68563E-05	chr5	44107542	44107592	LOC101104574	Intron (XM_015096048.1/LOC101104574, intron 6 of 8)
cg23871793	8.68965E-05	chr8	37618497	37618547	FAXC	Distal Intergenic
cg10264911	8.93931E-05	chr7	58615151	58615201	FBN1	Exon (XM_012181624.2/FBN1, exon 3 of 65)
cg20681197	9.08559E-05	chr11	46456076	46456126	MRC2	Exon (XM_015098369.1/MRC2, exon 7 of 34)
cg14323200	9.16704E-05	chr9	37833949	37833999	TOX	Intron (XM_015097774.1/TOX, intron 1 of 7)
cg16882893	9.28009E-05	chr19	50194656	50194706	RBM5	Intron (XM_004018446.3/RBM5, intron 6 of 24)
cg08072036	9.46042E-05	chr5	90591099	90591149	FAM172A	Intron (XM_012178947.2/FAM172A, intron 6 of 10)
cg25258174	9.49597E-05	chr2	132870350	132870400	MIR10B	Promoter (1-2kb)
cg24548483	9.61625E-05	chr20	23080180	23080230	TFAP2B	Intron (XM_015102745.1/TFAP2B, intron 1 of 8)
cg06438433	9.73041E-05	chr1	103695008	103695058	ZBTB7B	Exon (XM_012182605.1/ZBTB7B, exon 5 of 5)
cg26773629	9.92053E-05	chr1	138929811	138929861	TRNAS-GGA	Distal Intergenic
cg08074847	0.000100153	chr12	61944170	61944220	DHX9	5' UTR
cg04584667	0.000102411	chr5	50632359	50632409	SPRY4	Downstream (1-2kb)
cg07893689	0.00010332	chr3	81870824	81870874	LOC106991055	Intron (XR_001434315.1/LOC106991055, intron 2 of 2)
cg20271991	0.00010472	chr14	39948246	39948296	ZNF536	Promoter (<=1kb)
cg04330548	0.000107571	chr25	23331388	23331438	CTNNA3	Exon (XM_004021401.3/LRRTM3, exon 3 of 3)
cg18568529	0.000108141	chr8	26164196	26164246	REV3L	Exon (XM_012182594.2/REV3L, exon 22 of 32)
cg05253023	0.000109079	chr17	7055131	7055181	LRBA	5' UTR
cg17644722	0.000109473	chr18	42307765	42307815	NPAS3	Promoter (<=1kb)
cg15651616	0.000109523	chr23	45311605	45311655	SLC14A2	Intron (XM_012103628.2/SLC14A2, intron 2 of 20)
cg12761282	0.000110548	chr13	52088914	52088964	TGM3	Promoter (<=1kb)
cg05284821	0.00011138	chr9	72058219	72058269	ZFPM2	Distal Intergenic
cg04198941	0.000112403	chr7	8892536	8892586	LOC105615610	Distal Intergenic
cg07693105	0.000112719	chr10	26156364	26156414	NBEA	Intron (XM_012184587.1/NBEA, intron 33 of 50)
cg14571240	0.000112993
cg13868888	0.000113337	chr14	39948248	39948298	ZNF536	Promoter (<=1kb)
cg02393105	0.000116402	chr1	114342977	114343027	TRNAC-ACA	Distal Intergenic
cg25348293	0.000116535	chr3	132819925	132819975	SP1	Exon (XM_012174189.2/SP1, exon 4 of 7)
cg01494053	0.00011822	chr2	36977292	36977342	FAM219A	Exon (XM_015093068.1/FAM219A, exon 2 of 6)
cg14725330	0.000119086	chr20	46890866	46890916	RREB1	Exon (XM_015102623.1/RREB1, exon 15 of 20)
cg22089879	0.000120537	chr9	37964686	37964736	TOX	Intron (XM_004011695.3/TOX, intron 1 of 8)
cg00662931	0.000120813	chr13	12018172	12018222	GATA3	Promoter (3-4kb)
cg06941007	0.000121063	chr2	132870282	132870332	MIR10B	Promoter (1-2kb)
cg02886454	0.000121176	chr18	9199581	9199631	LOC101113177	Distal Intergenic
cg23505448	0.000122035	chr18	31698283	31698333	LINGO1	Distal Intergenic
cg26771379	0.000122233	chr9	59422516	59422566	MED30	Distal Intergenic
cg15954878	0.000123461	chrX	30640007	30640057	DMD	Promoter (<=1kb)
cg10581670	0.000123568	chr8	37683713	37683763	FBXL4	Distal Intergenic
cg23012040	0.00012427	chr2	164733555	164733605	GTDC1	Intron (XM_012138353.2/GTDC1, intron 3 of 10)
cg12825194	0.000126133	chr5	44107695	44107745	LOC101104574	Exon (XM_015096050.1/LOC101104574, exon 6 of 9)
cg21532697	0.000126797	chr25	33784625	33784675	LOC105605020	Promoter (1-2kb)
cg02275662	0.000127239	chr26	31156104	31156154	LOC105607919	Distal Intergenic
cg15792779	0.000128108
cg24579452	0.000131685	chr25	33784622	33784672	LOC105605020	Promoter (1-2kb)
cg16612602	0.000131724	chr23	3040760	3040810	LOC105604384	Distal Intergenic
cg03533765	0.000132891	chr2	161023046	161023096	LOC105609664	Distal Intergenic
cg04546455	0.000133648	chr12	31723572	31723622	SDCCAG8	Intron (XM_004013657.3/SDCCAG8, intron 16 of 17)
cg26132310	0.000137481	chr3	63204602	63204652	BCL11A	Exon (XM_012170922.2/BCL11A, exon 2 of 6)
cg21734251	0.000138441	chr13	13173104	13173154	TRNAG-UCC	Distal Intergenic
cg03458585	0.0001393	chr3	63183162	63183212	BCL11A	Distal Intergenic
cg23567910	0.000139739	chr14	39948087	39948137	ZNF536	Promoter (<=1kb)
cg17386116	0.000140337	chr1	103695034	103695084	ZBTB7B	Exon (XM_012182605.1/ZBTB7B, exon 5 of 5)
cg05860955	0.000140642	chr7	14362220	14362270	MAP2K5	Intron (XM_004010259.3/MAP2K5, intron 19 of 21)
cg13686952	0.000141012	chr11	39652222	39652272	IKZF3	Intron (XM_012186051.2/IKZF3, intron 2 of 2)
cg02600043	0.000142416	chr2	92321322	92321372	IZUMO3	Distal Intergenic
cg05108467	0.000143593	chr18	9705015	9705065	NR2F2	Promoter (<=1kb)
cg03951988	0.00014463
cg24302947	0.00014565	chr13	12007282	12007332	GATA3	Distal Intergenic
cg02112674	0.000145693	chr3	134157622	134157672	SCN8A	3' UTR
cg21330727	0.000146426	chr11	39989280	39989330	RAPGEFL1	Intron (XM_015098765.1/RAPGEFL1, intron 2 of 17)
cg24911138	0.00014712	chr19	50197048	50197098	RBM5	Exon (XM_004018446.3/RBM5, exon 6 of 25)
cg12916599	0.000148579	chr1	142887110	142887160	ROBO2	Intron (XM_012187741.2/ROBO2, intron 2 of 28)
cg24579136	0.000149769	chr5	90344141	90344191	NR2F1	Distal Intergenic
cg13387869	0.000150126	chr2	40585169	40585219	NEFM	3' UTR
cg25670404	0.000152825	chr1	113574953	113575003	LOC101111064	Distal Intergenic
cg22314954	0.000153356	chr1	114537592	114537642	PBX1	Intron (XM_012185380.2/PBX1, intron 2 of 9)
cg21287024	0.000154227	chr1	114625762	114625812	PBX1	Intron (XM_012185380.2/PBX1, intron 2 of 9)
cg26056026	0.000155434	chr21	45035860	45035910	LRP5	Intron (XM_015102992.1/LRP5, intron 5 of 27)
cg09117488	0.000155887	chr11	39466735	39466785	LOC105610166	Exon (LOC105610166/LOC105610166, exon 1 of 1)
cg26470591	0.000159906	chr9	46657698	46657748	NCOA2	5' UTR
cg19435191	0.000162451	chr2	44185800	44185850	LOC101120470	Distal Intergenic
cg18936678	0.000162629	chr3	9335431	9335481	LMX1B	Distal Intergenic
cg05810333	0.000164289	chr23	31896143	31896193	ZNF521	Intron (XM_015103618.1/ZNF521, intron 4 of 5)
cg12613764	0.00016519	chr9	84362953	84363003	RUNX1T1	Distal Intergenic
cg01241934	0.000165717	chr2	239288940	239288990	ARID1A	Exon (XM_015093664.1/ARID1A, exon 1 of 13)
cg17233785	0.000167408	chr7	20014208	20014258	NPTN	Exon (XM_004010288.3/NPTN, exon 2 of 9)
cg00935474	0.000169006	chr1	35699985	35700035	LOC106990409	Distal Intergenic
cg11998644	0.000169224	chr7	27736395	27736445	LOC105615667	Distal Intergenic
cg13502730	0.000169554	chr1	67254610	67254660	BARHL2	Distal Intergenic
cg18654962	0.000170121
cg25882772	0.00017145	chr2	183118177	183118227	EN1	Intron (XM_015092820.1/EN1, intron 10 of 10)
cg02733100	0.000172498	chr3	64568301	64568351	LOC105612568	Distal Intergenic
cg22097199	0.000173688	chr15	36796638	36796688	LOC105602234	Distal Intergenic
cg26023682	0.000174362	chr12	67636558	67636608	PROX1	Intron (XM_015099370.1/PROX1, intron 1 of 4)
cg16108895	0.00017725	chr1	22947453	22947503	AGBL4	Intron (XM_015091781.1/AGBL4, intron 6 of 12)
cg23052369	0.000178568	chr2	182575624	182575674	LOC105609891	Promoter (<=1kb)
cg18720302	0.000179244	chr26	31204110	31204160	LOC105607919	Promoter (2-3kb)
cg14017612	0.000179341	chr2	136602576	136602626	DLX1	Distal Intergenic
cg15129083	0.000179747	chr3	132180136	132180186	HOXC6	Promoter (<=1kb)
cg15827607	0.000181113	chr23	31480755	31480805	ZNF521	Distal Intergenic
cg11832532	0.000181999	chr5	48616607	48616657	PURA	Promoter (<=1kb)
cg18068695	0.000182144	chr5	26484939	26484989	ZNF608	Exon (XM_015095945.1/ZNF608, exon 4 of 10)
cg21089549	0.000182222	chr13	13173108	13173158	TRNAG-UCC	Distal Intergenic
cg07264916	0.000185125	chr2	206862256	206862306	NRP2	Exon (XM_012143443.2/NRP2, exon 16 of 16)
cg14814052	0.000185325	chr7	66306725	66306775	LOC101114782	Distal Intergenic
cg03787614	0.000185399	chr8	35029731	35029781	GRIK2	Intron (XM_012182720.2/GRIK2, intron 12 of 15)
cg17835092	0.000186662	chr2	233481817	233481867	ZNF362	Exon (XM_015092848.1/ZNF362, exon 8 of 10)
cg21827016	0.000187034	chr6	111192595	111192645	LDB2	Intron (XM_004010007.3/LDB2, intron 2 of 7)
cg12521448	0.000187106	chr10	35344257	35344307	LOC105609559	Distal Intergenic
cg01374899	0.00018758	chr3	63215089	63215139	BCL11A	Intron (XM_012170922.2/BCL11A, intron 2 of 5)
cg21471303	0.000187609	chr13	76621530	76621580	ARFGEF2	Exon (XM_015099925.1/ARFGEF2, exon 26 of 36)
cg13463879	0.000188048	chr5	85526821	85526871	MEF2C	3' UTR
cg14344369	0.000188401	chr3	63180013	63180063	BCL11A	Distal Intergenic
cg20236179	0.000188776	chr14	52037884	52037934	FOSB	Exon (XM_012190549.2/FOSB, exon 2 of 5)
cg14944561	0.000189466	chr2	164955556	164955606	GTDC1	Intron (XM_012138353.2/GTDC1, intron 6 of 10)
cg08000020	0.000190031
cg26125311	0.00019292	chr1	214336268	214336318	TNIK	Intron (XM_012099241.2/TNIK, intron 31 of 32)
cg12875098	0.000193775	chr1	114537488	114537538	PBX1	Intron (XM_012185380.2/PBX1, intron 2 of 9)
cg07150184	0.000196243	chr20	17681399	17681449	TMEM63B	Exon (XM_012100740.2/TMEM63B, exon 21 of 24)
cg21969011	0.000196515	chr8	43034606	43034656	LOC101107027	Distal Intergenic
cg11421449	0.000196613	chr11	50461146	50461196	BAHCC1	Intron (XM_015098920.1/BAHCC1, intron 3 of 38)
cg24950900	0.000198602	chr2	246343235	246343285	UBR4	Exon (XM_015092876.1/UBR4, exon 58 of 109)
cg23238433	0.000200498	chr1	103694949	103694999	ZBTB7B	Exon (XM_012182605.1/ZBTB7B, exon 5 of 5)
cg14912619	0.00020339	chr20	41271537	41271587	LOC105603855	Distal Intergenic
cg06020087	0.000204939	chr12	13195908	13195958	BRINP3	Exon (XM_004013591.2/BRINP3, exon 2 of 8)
cg26497004	0.000205103	chr14	36981081	36981131	LOC105606377	Intron (XR_001435696.1/LOC105606377, intron 2 of 2)
cg18666517	0.000205683	chr4	102695904	102695954	LOC101105324	Exon (XM_004008102.2/LOC101105324, exon 10 of 10)
cg27378109	0.000207461	chr22	31919296	31919346	VTI1A	Intron (XM_012102940.2/VTI1A, intron 3 of 7)
cg25636395	0.000209493	chr4	79026481	79026531	GLI3	Intron (XM_012177448.1/GLI3, intron 11 of 17)
cg11043376	0.000211031	chr15	59871615	59871665	LOC101111830	Intron (XM_012096149.2/LOC101111830, intron 19 of 37)
cg26575674	0.000213045	chr17	66170175	66170225	LOC101105359	Distal Intergenic
cg23571447	0.000214789	chr6	69533480	69533530	GSX2	Promoter (3-4kb)
cg18202122	0.000215252	chr10	48568592	48568642	LOC106991372	Distal Intergenic
cg01971426	0.000215373	chr1	125579232	125579282	LOC105610400	Distal Intergenic
cg21716905	0.000216675	chr7	29657327	29657377	MEIS2	Intron (XM_012181166.1/MEIS2, intron 9 of 12)
cg18445981	0.000216851	chr22	46762691	46762741	LOC105604346	Distal Intergenic
cg10101368	0.000219322
cg10039823	0.000219973	chr20	22490857	22490907	DEFB112	Distal Intergenic
cg02040823	0.000220043	chr21	33371815	33371865	OPCML	Intron (XM_012101904.2/OPCML, intron 1 of 7)
cg13311201	0.000220724	chr3	63205298	63205348	BCL11A	Intron (XM_012170922.2/BCL11A, intron 2 of 5)
cg20350072	0.000221393	chr7	8892570	8892620	LOC105615610	Distal Intergenic
cg11005692	0.000221466	chr6	116133366	116133416	SLBP	Distal Intergenic
cg26545086	0.000226444
cg23718844	0.000227948	chr18	9419645	9419695	LOC101113177	Distal Intergenic
cg08666298	0.000229453	chr11	48048449	48048499	DDX5	Intron (XM_004013032.3/DDX5, intron 11 of 12)
cg13322472	0.000230189	chr10	47065546	47065596	DACH1	Distal Intergenic
cg16484095	0.000231527	chr23	16686091	16686141	LOC101106384	Distal Intergenic
cg18866404	0.000232144	chr15	29659836	29659886	PVRL1	Exon (XM_015100773.1/PVRL1, exon 5 of 5)
cg18656175	0.000232773	chr10	48568680	48568730	LOC106991372	Distal Intergenic
cg21257656	0.000232928	chr20	35558464	35558514	CDKAL1	Intron (XM_015102823.1/CDKAL1, intron 12 of 13)
cg07679770	0.000234859	chr10	53364480	53364530	SLAIN1	Distal Intergenic
cg11299873	0.000238287	chr2	164519474	164519524	ZEB2	Exon (XM_012138277.2/ZEB2, exon 15 of 15)
cg22208091	0.000240241	chr5	77306468	77306518	LOC101120408	Intron (XM_015095546.1/LOC101120408, intron 4 of 28)
cg13602621	0.000240421	chr2	137906688	137906738	LOC105607491	Intron (XR_001030958.2/LOC105607491, intron 1 of 2)
cg19843353	0.000241619	chr5	37822719	37822769	TRIM41	Promoter (<=1kb)
cg02364050	0.000243093	chr11	47118118	47118168	TANC2	Exon (XM_015098859.1/TANC2, exon 27 of 28)
cg06670018	0.000246781	chr2	136602643	136602693	DLX1	Distal Intergenic
cg03372131	0.000247373	chr5	90344136	90344186	NR2F1	Distal Intergenic
cg23505674	0.000247771	chr13	53299844	53299894	RTEL1	Exon (XM_015099778.1/RTEL1, exon 25 of 36)
cg14420219	0.000249504	chr2	164955330	164955380	GTDC1	Intron (XM_012138353.2/GTDC1, intron 6 of 10)
cg08911427	0.000249678	chr20	16777721	16777771	SRF	5' UTR
cg25412421	0.000250429	chr14	37924795	37924845	LOC106991599	Exon (XR_001435702.1/LOC106991599, exon 3 of 5)
cg11923491	0.00025089	chr9	52592811	52592861	ZFHX4	Intron (XM_012183892.2/ZFHX4, intron 3 of 10)
cg07296993	0.000251264	chr3	133061590	133061640	SPRYD3	Intron (XM_004006313.3/SPRYD3, intron 1 of 10)
cg13908214	0.000252678	chr20	23112546	23112596	TFAP2B	Distal Intergenic
cg12143045	0.000253509	chr7	2999411	2999461	KCNN2	Exon (XM_004010178.3/KCNN2, exon 5 of 16)
cg26441853	0.00025717	chr3	97598404	97598454	LOC105612338	Distal Intergenic
cg04441307	0.000258524	chrX	54216834	54216884	RBM10	Intron (XM_012106815.2/RBM10, intron 2 of 19)
cg02761880	0.000259546	chr18	45226242	45226292	LOC106991743	Intron (XR_001436095.1/LOC106991743, intron 1 of 2)
cg01336859	0.000260493	chr14	25655204	25655254	CNOT1	Exon (XM_004015040.2/CNOT1, exon 48 of 49)
cg17834517	0.000260907	chr24	3920919	3920969	GLYR1	Exon (XM_015104068.1/GLYR1, exon 10 of 16)
cg11128281	0.000265488	chr17	7055067	7055117	LRBA	Promoter (<=1kb)
cg08957853	0.000266291	chr19	50197014	50197064	RBM5	Exon (XM_004018446.3/RBM5, exon 6 of 25)
cg04351740	0.000267046	chr1	66465713	66465763	LRRC8D	Exon (XM_004002183.3/LRRC8D, exon 2 of 2)
cg06712913	0.000267523	chr17	7059961	7060011	LRBA	Intron (XM_015101368.1/LRBA, intron 38 of 56)
cg23874845	0.00026783	chr3	94700340	94700390	SPR	Distal Intergenic
cg11641421	0.000268379	chr3	26864843	26864893	TRNAC-ACA	Distal Intergenic
cg23452206	0.000269557	chr2	164955491	164955541	GTDC1	Intron (XM_012138353.2/GTDC1, intron 6 of 10)
cg16302658	0.000272776
cg05497416	0.000275977	chr3	97612548	97612598	LOC105612338	Distal Intergenic
cg15464531	0.000276006	chr22	21332636	21332686	BTRC	Intron (XM_004020119.3/BTRC, intron 2 of 14)
cg01441716	0.00027652	chrX	45507865	45507915	ZC3H12B	Exon (XM_004022034.3/ZC3H12B, exon 7 of 7)
cg00952114	0.00027697	chr7	8892652	8892702	LOC105615610	Distal Intergenic
cg25579186	0.000277119	chr19	50098590	50098640	SLC38A3	Exon (XM_012100031.1/SLC38A3, exon 11 of 14)
cg16159306	0.000277788	chr3	112389893	112389943	ZDHHC17	Intron (XM_015093909.1/ZDHHC17, intron 9 of 18)
cg24196036	0.000277904	chr10	45726525	45726575	KLHL1	Distal Intergenic
cg05772542	0.000278865	chr2	81739842	81739892	LOC101120890	Distal Intergenic
cg25651791	0.000281667	chr3	10995546	10995596	OLFML2A	Promoter (6-7kb)
cg17950076	0.000282166	chr2	134936155	134936205	SP3	5' UTR
cg06607996	0.000282838	chr1	103683914	103683964	ZBTB7B	Intron (XM_012182605.1/ZBTB7B, intron 1 of 4)
cg26660486	0.000282913	chr11	47118094	47118144	TANC2	Exon (XM_015098859.1/TANC2, exon 27 of 28)
cg10480724	0.00028318
cg18428069	0.000283235	chr2	134815475	134815525	OLA1	Intron (XM_012133444.2/OLA1, intron 7 of 10)
cg00044472	0.000288417	chr2	164456499	164456549	ZEB2	Intron (XM_012138277.2/ZEB2, intron 5 of 14)
cg21858607	0.00028907	chr19	30195626	30195676	FOXP1	Intron (XM_015102109.1/FOXP1, intron 3 of 17)
cg02380426	0.000289644	chr20	44500810	44500860	TFAP2A	Exon (NM_001009745.1/TFAP2A, exon 15 of 16)
cg17711602	0.000290407	chr13	12007342	12007392	GATA3	Distal Intergenic
cg25908356	0.000292501	chr2	222364633	222364683	EPHA4	Distal Intergenic
cg25879427	0.000294422	chr11	48120644	48120694	SMURF2	Exon (XM_015098881.1/SMURF2, exon 9 of 18)
cg13008977	0.000294713	chr16	665414	665464	SLIT3	Exon (XM_015101217.1/SLIT3, exon 6 of 39)
cg24978178	0.000297747	chr1	63776135	63776185	LMO4	Distal Intergenic
cg05338529	0.000299698	chr1	13321772	13321822	RRAGC	Distal Intergenic
cg07853634	0.000302776	chr15	26073787	26073837	TRNAC-GCA	Distal Intergenic
cg22748772	0.000304199	chr24	41874293	41874343	LOC105604839	Distal Intergenic
cg15829742	0.000304772	chr1	250983860	250983910	MSL2	Exon (XM_004003317.3/MSL2, exon 2 of 2)
cg00674815	0.000306765	chr16	14229090	14229140	ADAMTS6	Exon (XM_015101273.1/ADAMTS6, exon 13 of 25)
cg15689830	0.000307914	chr8	26164190	26164240	REV3L	Exon (XM_012182594.2/REV3L, exon 22 of 32)
cg11368968	0.000310739	chr8	26079391	26079441	REV3L	5' UTR
cg07028853	0.000311357	chr14	41920898	41920948	ZNF507	Distal Intergenic
cg13540458	0.000312486	chr1	114625704	114625754	PBX1	Intron (XM_012185380.2/PBX1, intron 2 of 9)
cg15131523	0.000313034	chr9	77794598	77794648	OSR2	3' UTR
cg08500171	0.000314665	chr20	26720886	26720936	PRRC2A	Exon (XM_015102789.1/PRRC2A, exon 1 of 35)
cg10694470	0.000314999
cg00896947	0.000318695	chr4	91988921	91988971	SND1	Intron (XM_012177455.1/SND1, intron 10 of 27)
cg12135110	0.000318755	chr2	199924314	199924364	LOC106990596	Distal Intergenic
cg02102645	0.000319989	chr6	69533708	69533758	GSX2	Promoter (3-4kb)
cg05037737	0.000321634	chr14	56457175	56457225	LOC101102332	Promoter (<=1kb)
cg11099350	0.000324673	chr5	85209328	85209378	LOC106991172	Intron (LOC106991172/LOC106991172, intron 3 of 4)
cg19977633	0.000325027	chr5	50132405	50132455	ARAP3	Distal Intergenic
cg04832088	0.000325829	chr9	72011294	72011344	ZFPM2	Distal Intergenic
cg02334049	0.000327368	chr5	85557574	85557624	MEF2C	Exon (XM_012177548.2/MEF2C, exon 6 of 11)
cg17775617	0.000327779	chr8	36707632	36707682	SIM1	Distal Intergenic
cg09985959	0.000329342	chr4	72254245	72254295	ADAM22	Exon (XM_012176914.2/ADAM22, exon 24 of 29)
cg06173875	0.000332134	chr13	74183945	74183995	SLC12A5	Promoter (<=1kb)
cg24998454	0.000332233	chr18	35557028	35557078	NOVA1	Exon (XM_012098747.1/NOVA1, exon 4 of 4)
cg08933909	0.000337409	chr15	24120300	24120350	ZBTB16	Intron (XM_012096530.2/ZBTB16, intron 4 of 7)
cg24830580	0.000338323	chr18	36233809	36233859	TRNAS-GGA	Distal Intergenic
cg06639082	0.000341411	chr3	63193282	63193332	BCL11A	Promoter (4-5kb)
cg17156238	0.000341897	chr14	21956520	21956570	LOC105601845	Distal Intergenic
cg22033619	0.000343274	chr3	63183067	63183117	BCL11A	Distal Intergenic
cg12904021	0.000344092	chr10	46714342	46714392	DACH1	Intron (XM_012184753.2/DACH1, intron 2 of 11)
cg14011255	0.00034415	chr7	66239576	66239626	OTX2	Distal Intergenic
cg04227740	0.000344246	chr20	16777786	16777836	SRF	Exon (XM_012100695.2/SRF, exon 1 of 6)
cg24765252	0.000348636	chr9	77794583	77794633	OSR2	3' UTR
cg20563526	0.000353188	chr24	29924636	29924686	LOC105604757	Distal Intergenic
cg21045107	0.000353584	chr1	203375471	203375521	SOX2	Promoter (1-2kb)
cg20505337	0.000359825	chrX	49398229	49398279	HUWE1	Exon (XM_012106641.2/HUWE1, exon 51 of 85)
cg11792642	0.000361643	chr25	32622555	32622605	KCNMA1	Intron (NM_001303455.1/KCNMA1, intron 8 of 25)
cg24380618	0.000362119	chr17	52621829	52621879	CLIP1	Exon (XM_012097743.2/CLIP1, exon 10 of 18)
cg17718742	0.000366946	chr1	268522675	268522725	ERG	Exon (XM_015091773.1/ERG, exon 6 of 11)
cg07605328	0.00036933	chr2	164456502	164456552	ZEB2	Intron (XM_012138277.2/ZEB2, intron 5 of 14)
cg21768236	0.000369378	chr1	233469168	233469218	MBNL1	Promoter (<=1kb)
cg19961390	0.000381999	chr1	19426499	19426549	ZSWIM5	Exon (XM_012124465.2/ZSWIM5, exon 14 of 14)
cg09189380	0.000382043	chr3	7918450	7918500	DNM1	Intron (XM_015094164.1/DNM1, intron 13 of 24)
cg15800651	0.000382088	chr5	86047584	86047634	LOC105615321	Distal Intergenic
cg15393941	0.000382188	chr1	33373728	33373778	TRNAS-GGA	Downstream (1-2kb)
cg22717202	0.000383605	chr2	165278461	165278511	ARHGAP15	Intron (XM_004004720.3/ARHGAP15, intron 12 of 13)
cg17346246	0.000385617
cg25707473	0.000386853	chr21	11671656	11671706	DLG2	Intron (XM_012101656.2/DLG2, intron 20 of 25)
cg15446958	0.000390147	chr1	30572680	30572730	TRNAW-CCA	Distal Intergenic
cg27018912	0.000391997
cg19302474	0.000393782	chr8	43034561	43034611	LOC101107027	Distal Intergenic
cg13099136	0.000396232	chr2	164256627	164256677	TRNAC-GCA	Distal Intergenic
cg03598688	0.000398034	chr7	13492220	13492270	SMAD6	Distal Intergenic
cg20986125	0.000402314	chr22	26318110	26318160	SORCS1	3' UTR
cg24829928	0.000402348	chr25	32452583	32452633	KCNMA1	Exon (NM_001303455.1/KCNMA1, exon 21 of 26)
cg16237236	0.000402401	chr12	45248524	45248574	CHD5	Exon (XM_012187945.2/CHD5, exon 40 of 42)
cg12768069	0.000402602	chr20	23825194	23825244	PKHD1	Intron (XM_015102755.1/PKHD1, intron 58 of 64)
cg17199893	0.000406015	chr11	37405006	37405056	MIR10A	Promoter (6-7kb)
cg26828026	0.000406244	chr9	84362972	84363022	RUNX1T1	Distal Intergenic
cg05167834	0.000406388	chr23	47166137	47166187	SKOR2	Distal Intergenic
cg25531090	0.000408774	chr2	88060309	88060359	LOC101101960	Distal Intergenic
cg09495541	0.000410259	chr2	163278733	163278783	LOC105609180	Distal Intergenic
cg04431616	0.00041046	chr1	114625781	114625831	PBX1	Intron (XM_012185380.2/PBX1, intron 2 of 9)
cg00092013	0.000411897	chr1	13831105	13831155	MACF1	Exon (XM_015091883.1/MACF1, exon 63 of 100)
cg10839301	0.000413748	chr7	28666035	28666085	LOC105610615	Distal Intergenic
cg20779731	0.000414165	chr25	29475422	29475472	NDST2	Exon (XM_015104451.1/NDST2, exon 15 of 17)
cg06550953	0.000414962	chr10	46545743	46545793	DACH1	Exon (XM_012184753.2/DACH1, exon 8 of 12)
cg11720786	0.000415277	chr2	54788557	54788607	LOC101110740	Intron (XM_015093166.1/LOC101110740, intron 4 of 19)
cg21963283	0.000415488	chr5	26445374	26445424	ZNF608	Intron (XM_015095945.1/ZNF608, intron 3 of 9)
cg02968098	0.000418471	chr3	11206655	11206705	NR6A1	3' UTR
cg06280003	0.000420538	chr3	132157455	132157505	HOXC4	Promoter (1-2kb)
cg18771300	0.000428388
cg21967337	0.000437896	chr5	79097040	79097090	LOC105606746	Intron (XM_012179309.2/LOC105606746, intron 1 of 1)
cg08402623	0.000439219	chr13	6572601	6572651	TASP1	Intron (XM_004014161.3/TASP1, intron 10 of 13)
cg23347753	0.000442356	chr3	44992575	44992625	OTX1	Promoter (2-3kb)
cg01105418	0.000442875	chr12	31223076	31223126	ZBTB18	Intron (XM_015099192.1/ZBTB18, intron 1 of 2)
cg06645733	0.000444007	chr25	30951683	30951733	C25H10orf11	Intron (XM_012105395.2/C25H10orf11, intron 2 of 5)
cg21846055	0.000445569	chr14	39948343	39948393	ZNF536	Promoter (<=1kb)
cg11167862	0.000446911	chr2	54788570	54788620	LOC101110740	Intron (XM_015093166.1/LOC101110740, intron 4 of 19)
cg03425126	0.000447745	chr1	238889640	238889690	LOC105604038	Promoter (9-10kb)
cg11674963	0.000447798	chrX	22085943	22085993	POLA1	Intron (XM_012106423.2/POLA1, intron 33 of 36)
cg14791398	0.00044811	chr1	273384493	273384543	SATB1	Exon (XM_015092727.1/SATB1, exon 1 of 10)
cg00948634	0.000448484	chr2	38395704	38395754	STMN4	3' UTR
cg03904834	0.000451398	chr8	45705593	45705643	LOC106990392	Distal Intergenic
cg02979539	0.000452033	chr9	84602365	84602415	RUNX1T1	Distal Intergenic
cg02905739	0.000453567	chr15	1445517	1445567	GRIA4	Exon (XM_012095292.2/GRIA4, exon 15 of 16)
cg13105228	0.000454556	chr15	25198212	25198262	CADM1	Exon (XM_004016040.3/CADM1, exon 6 of 10)
cg26757097	0.000454874	chr20	7534528	7534578	RGL2	Exon (XM_015102651.1/RGL2, exon 18 of 20)
cg04585382	0.000455974	chr8	29022626	29022676	NR2E1	Promoter (<=1kb)
cg23916624	0.000458062	chr11	48048436	48048486	DDX5	Intron (XM_004013032.3/DDX5, intron 11 of 12)
cg24667723	0.000461319	chr2	54788494	54788544	LOC101110740	Intron (XM_015093166.1/LOC101110740, intron 4 of 19)
cg17826245	0.000465584	chr2	164955563	164955613	GTDC1	Intron (XM_012138353.2/GTDC1, intron 6 of 10)
cg06491768	0.000468471	chr1	63754123	63754173	LMO4	Intron (XM_004002167.3/LMO4, intron 2 of 4)
cg10746994	0.000471646	chr11	13046642	13046692	ACACA	Intron (NM_001009256.1/ACACA, intron 45 of 57)
cg26899327	0.000471851	chr5	90337782	90337832	NR2F1	Distal Intergenic
cg12269412	0.000472354	chr7	8892567	8892617	LOC105615610	Distal Intergenic
cg11150973	0.000477351	chr2	144980381	144980431	FIGN	Exon (XM_012135549.2/FIGN, exon 2 of 2)
cg14182735	0.000477401	chr2	154008148	154008198	GALNT13	Exon (XM_004004690.3/GALNT13, exon 11 of 13)
cg13489443	0.00047887	chr6	98791255	98791305	NKX6-1	Distal Intergenic
cg03995116	0.000480298	chr17	56603394	56603444	TAOK3	Exon (XM_015101646.1/TAOK3, exon 15 of 21)
cg14106853	0.000483633	chr2	220324327	220324377	DES	Exon (XM_004004952.3/DES, exon 5 of 9)
cg26524453	0.000487543	chr7	20508112	20508162	RABGGTA	Exon (XM_004010300.3/RABGGTA, exon 4 of 17)
cg17829746	0.000488079	chr12	67634867	67634917	PROX1	Exon (XM_015099370.1/PROX1, exon 2 of 5)
cg19426872	0.000489172	chr11	9005075	9005125	38231	Exon (XM_012185173.2/SEPT4, exon 10 of 12)
cg11054001	0.000490385	chr2	161954871	161954921	LOC101114685	Distal Intergenic
cg03174925	0.00049487	chr12	49697652	49697702	SPEN	Exon (XM_015099297.1/SPEN, exon 2 of 18)
cg20798091	0.000496347	chr2	222207812	222207862	TRNAS-GGA	Distal Intergenic
cg08317941	0.000496539	chr20	23472653	23472703	LOC106991807	Intron (XR_001436375.1/LOC106991807, intron 2 of 2)
cg12206159	0.00049654	chr13	49043734	49043784	LOC101118207	Distal Intergenic
cg25573807	0.00050011	chr4	30220881	30220931	SP4	Exon (XM_015095217.1/SP4, exon 3 of 6)
cg03158071	0.000500583	chr7	29544611	29544661	MEIS2	Exon (XM_012181166.1/MEIS2, exon 12 of 13)
cg00919407	0.000500804	chr22	14738569	14738619	LGI1	Exon (XM_012102587.2/LGI1, exon 3 of 8)
cg16277100	0.000504016	chr6	14526882	14526932	PITX2	Distal Intergenic
cg12723790	0.000504427	chr1	138929556	138929606	TRNAS-GGA	Distal Intergenic
cg20162200	0.000505277	chr5	34030955	34031005	LOC105611207	Distal Intergenic
cg06940357	0.000508445	chr12	47396654	47396704	TP73	Intron (XM_012187410.2/TP73, intron 3 of 13)
cg21715204	0.000510299	chr21	28039979	28040029	PKNOX2	Exon (XM_004019514.2/PKNOX2, exon 9 of 12)
cg15377343	0.000511005	chr2	84901125	84901175	BNC2	Distal Intergenic
cg18305324	0.000514135	chr20	26720932	26720982	PRRC2A	Exon (XM_015102789.1/PRRC2A, exon 1 of 35)
cg05387692	0.000515256	chr25	30820818	30820868	LOC106991580	Intron (XR_001436731.1/LOC106991580, intron 5 of 6)
cg00885424	0.000516927	chr2	42633941	42633991	PEBP4	Intron (XM_012119233.2/PEBP4, intron 4 of 6)
cg24052926	0.000517841	chr11	26709336	26709386	FGF11	Exon (XM_004012656.3/FGF11, exon 2 of 5)
cg17392875	0.000518092	chr5	90324474	90324524	NR2F1	Intron (XM_012179315.2/NR2F1, intron 2 of 4)
cg04968182	0.000524684	chr5	14720792	14720842	HNRNPM	Exon (XM_012177978.2/HNRNPM, exon 15 of 17)
cg12389415	0.000525084	chr6	114995507	114995557	HTT	Exon (NM_001142638.1/HTT, exon 14 of 92)
cg09617216	0.000525407	chr17	68067218	68067268	EMID1	Intron (XM_015101420.1/EMID1, intron 19 of 19)
cg21812916	0.000525514	chr15	50033743	50033793	CLPB	Intron (XM_012096002.1/CLPB, intron 4 of 14)
cg12961607	0.000527405	chr3	85206773	85206823	SRSF7	Intron (XM_012173447.1/SRSF7, intron 3 of 7)
cg04769602	0.000530547	chr17	41490373	41490423	GRIA2	3' UTR
cg01193554	0.00053454	chr1	15671185	15671235	FOXO6	Intron (XM_015091659.1/FOXO6, intron 1 of 10)
cg04870330	0.000534647	chr15	74173647	74173697	PHF21A	Intron (XM_012096319.2/PHF21A, intron 7 of 19)
cg16573364	0.000536782	chr5	85527365	85527415	MEF2C	Exon (XM_012177548.2/MEF2C, exon 11 of 11)
cg08611749	0.000539052	chr8	39149549	39149599	LOC105611309	Intron (XR_001435020.1/LOC105611309, intron 2 of 4)
cg20123148	0.000540965	chr5	90995048	90995098	KIAA0825	Intron (XM_012178948.1/KIAA0825, intron 19 of 21)
cg21761702	0.000543656	chr3	10126825	10126875	PBX3	Intron (XM_012162805.2/PBX3, intron 4 of 10)
cg19577529	0.000544842	chr8	30905949	30905999	PRDM1	5' UTR
cg18954869	0.000547892	chr20	23080134	23080184	TFAP2B	Intron (XM_015102745.1/TFAP2B, intron 1 of 8)
cg11009477	0.000548409	chr10	41661859	41661909	LOC101121273	Distal Intergenic
cg15159280	0.000553563	chr3	97595948	97595998	LOC105612338	Distal Intergenic
cg15905834	0.000560071	chr18	10867973	10868023	LOC105603050	Intron (XR_001436039.1/LOC105603050, intron 1 of 5)
cg19044425	0.00056022	chr11	20019817	20019867	TIAF1	Downstream (2-3kb)
cg14485755	0.000560336	chr15	71323336	71323386	LOC105602424	Distal Intergenic
cg26765160	0.000564029	chr15	74907316	74907366	LRP4	Exon (XM_015100817.1/LRP4, exon 40 of 40)
cg16193888	0.000564961	chr2	56370676	56370726	LOC101111526	Distal Intergenic
cg23028216	0.000566482	chr2	31171178	31171228	C2H9orf3	Intron (XM_015093035.1/C2H9orf3, intron 16 of 16)
cg02262384	0.000567418	chr3	132716967	132717017	MAP3K12	Exon (XM_012174186.2/MAP3K12, exon 8 of 14)
cg15644076	0.000571852	chr3	97386449	97386499	LOC105612338	Distal Intergenic
cg04633983	0.000573975	chr1	67254503	67254553	BARHL2	Distal Intergenic
cg10853504	0.000577626	chr5	49867852	49867902	LOC101105495	Exon (XM_015096092.1/LOC101105495, exon 1 of 4)
cg00218447	0.00057916	chr3	132174525	132174575	HOXC5	Exon (XM_004006281.3/HOXC5, exon 3 of 3)
cg11215098	0.000579959	chr14	20568190	20568240	LOC105608140	Distal Intergenic
cg03504834	0.000585391	chr4	54045609	54045659	FOXP2	Promoter (<=1kb)
cg00438946	0.00058679	chr20	8400553	8400603	LOC101115236	Exon (XM_004018761.3/LOC101115236, exon 2 of 5)
cg19104094	0.000587779	chr22	21332541	21332591	BTRC	Intron (XM_004020119.3/BTRC, intron 2 of 14)
cg05737610	0.000590645	chr5	103670569	103670619	EFNA5	Intron (XM_004009108.2/EFNA5, intron 1 of 4)
cg21227553	0.000591985	chr3	67490586	67490636	CCDC85A	Exon (XM_004005934.3/CCDC85A, exon 5 of 7)
cg00240737	0.000593199	chr8	35357909	35357959	GRIK2	Exon (XM_012182720.2/GRIK2, exon 3 of 16)
cg23999281	0.000594091	chr14	19195576	19195626	LOC105608360	Distal Intergenic
cg20726986	0.000598883	chr22	36745804	36745854	EMX2	Downstream (1-2kb)
cg14466734	0.000603806	chr9	37834065	37834115	TOX	5' UTR
cg04270539	0.000606155	chr5	67782334	67782384	EBF1	Intron (XM_012178873.2/EBF1, intron 6 of 15)
cg04812757	0.000608117	chr20	22413670	22413720	DEFB112	Distal Intergenic
cg02039091	0.000608749	chr18	42972815	42972865	NPAS3	Intron (XM_015101805.1/NPAS3, intron 4 of 15)
cg00197024	0.000615862	chr2	213382726	213382776	ERBB4	Intron (XM_004004897.3/ERBB4, intron 1 of 26)
cg26236652	0.000617317	chr2	164456489	164456539	ZEB2	Intron (XM_012138277.2/ZEB2, intron 5 of 14)
cg16034279	0.000623274	chr2	201021053	201021103	TRNAW-CCA	Distal Intergenic
cg11866161	0.000625543	chr20	15966616	15966666	TRERF1	Exon (XM_015102716.1/TRERF1, exon 18 of 19)
cg09723377	0.000628756	chr8	90418093	90418143	DLL1	Promoter (1-2kb)
cg05894849	0.000633851	chr20	15397468	15397518	FOXP4	Promoter (8-9kb)
cg06166628	0.000634748	chr17	7053174	7053224	LRBA	Intron (XM_015101368.1/LRBA, intron 37 of 56)
cg22669570	0.000635666	chr23	10970090	10970140	CDH7	Exon (XM_015103579.1/CDH7, exon 3 of 12)
cg22820182	0.000639113	chr14	39736875	39736925	URI1	Intron (XM_004015132.3/URI1, intron 1 of 10)
cg08397726	0.000639729	chr24	30061780	30061830	LOC105604757	Distal Intergenic
cg25101569	0.000642701	chr13	80313081	80313131	LOC105608654	Distal Intergenic
cg27205174	0.000643827	chr20	46890928	46890978	RREB1	Exon (XM_015102623.1/RREB1, exon 15 of 20)
cg17494610	0.000645016	chr1	181040552	181040602	LOC101104286	Distal Intergenic
cg00766988	0.000645112	chr13	3434054	3434104	JAG1	Intron (XM_015099531.1/JAG1, intron 2 of 28)
cg10953135	0.000645243	chr13	13043804	13043854	TRNAG-UCC	Distal Intergenic
cg08667099	0.000645334	chr5	86047642	86047692	LOC105615321	Distal Intergenic
cg01996115	0.000645672	chr15	53986955	53987005	EMSY	Exon (XM_004016336.3/EMSY, exon 19 of 21)
cg21777134	0.000647019	chr3	97896323	97896373	LOC105612338	Distal Intergenic
cg10739156	0.000648698	chrX	21136576	21136626	SAT1	Intron (XM_004021966.3/SAT1, intron 3 of 5)
cg13110304	0.0006521	chr25	34311926	34311976	LOC105605025	Promoter (8-9kb)
cg24657259	0.000657915	chr1	120736514	120736564	LOC105609268	Distal Intergenic
cg03158654	0.000661441	chr3	63193224	63193274	BCL11A	Promoter (4-5kb)
cg03452756	0.000665018	chr26	14563135	14563185	LOC101114586	Exon (XM_012105774.2/LOC101114586, exon 11 of 22)
cg03443502	0.000666247	chr2	182346547	182346597	LOC105609881	Distal Intergenic
cg10668448	0.000669341	chr6	17235861	17235911	LEF1	Intron (XM_004009633.3/LEF1, intron 5 of 11)
cg05107826	0.000672798	chr7	13316323	13316373	SMAD6	Intron (XM_004010255.3/SMAD6, intron 1 of 3)
cg15436482	0.000674749	chr14	24337079	24337129	HERPUD1	3' UTR
cg08731760	0.000674861	chr15	36055829	36055879	LOC105602230	Distal Intergenic
cg12784172	0.000677858	chr18	54004998	54005048	ADAL	Exon (XM_004017928.3/ZSCAN29, exon 1 of 5)
cg02157959	0.000682667	chr25	31281912	31281962	C25H10orf11	Intron (XM_012105395.2/C25H10orf11, intron 2 of 5)
cg22418428	0.000683067	chr11	20019843	20019893	TIAF1	Downstream (2-3kb)
cg05425369	0.000688147	chr3	66131632	66131682	LOC101111446	Distal Intergenic
cg23177112	0.000688543	chr2	136602589	136602639	DLX1	Distal Intergenic
cg14647057	0.000690794	chr4	68872012	68872062	HOXA3	Intron (XM_015095340.1/HOXA3, intron 2 of 7)
cg19619003	0.000691831	chr1	15671210	15671260	FOXO6	Intron (XM_015091659.1/FOXO6, intron 1 of 10)
cg20444682	0.000692541	chr22	46991271	46991321	LOC105604346	Distal Intergenic
cg12291306	0.000694689	chrX	120464522	120464572	FRMPD3	Exon (XM_004022732.3/FRMPD3, exon 11 of 15)
cg02097817	0.000696371	chr18	56876591	56876641	UNC79	5' UTR
cg23643143	0.000699962	chr3	116298215	116298265	PTPRQ	Intron (XM_015094552.1/PTPRQ, intron 43 of 61)
cg05756833	0.000702982	chr19	30195664	30195714	FOXP1	Intron (XM_015102109.1/FOXP1, intron 3 of 17)
cg01670963	0.000706686
cg21245531	0.000707104	chr20	43925177	43925227	NEDD9	Intron (XM_015102845.1/NEDD9, intron 1 of 6)
cg04017541	0.000707193	chr8	36707671	36707721	SIM1	Distal Intergenic
cg09175523	0.000709104	chr3	4197145	4197195	CFAP77	Intron (XM_004007129.3/CFAP77, intron 5 of 5)
cg03012773	0.000709209	chr3	33838795	33838845	DPYSL5	3' UTR
cg06135680	0.00071246	chr20	17936776	17936826	CCNI2	Distal Intergenic
cg16267458	0.000713001	chr2	51429994	51430044	PAX5	Exon (XM_012120994.2/PAX5, exon 2 of 9)
cg11543317	0.000713038	chr10	73818942	73818992	MBNL2	Intron (XM_015098006.1/MBNL2, intron 5 of 9)
cg05434345	0.000713916	chr9	2083530	2083580	RIMS1	Exon (XM_012184227.2/RIMS1, exon 1 of 39)
cg15004147	0.000713933	chr20	23571667	23571717	LOC106991807	Distal Intergenic
cg06597890	0.000715603	chr1	227640280	227640330	SHOX2	Distal Intergenic
cg24878162	0.000717778	chr7	63638504	63638554	BMP4	Intron (XM_012180609.2/BMP4, intron 1 of 3)
cg06023161	0.000722583	chr20	26721038	26721088	PRRC2A	5' UTR
cg05450652	0.000726451	chr2	182457291	182457341	LOC105609881	Distal Intergenic
cg19376385	0.000728106	chr8	39571846	39571896	MMS22L	Intron (XM_012182736.1/MMS22L, intron 14 of 24)
cg13772153	0.000728184	chrX	122073639	122073689	GLRA4	Exon (XM_004022463.3/GLRA4, exon 7 of 9)
cg20126035	0.000733648	chr7	66091635	66091685	OTX2	Promoter (<=1kb)
cg20807423	0.000737085	chr3	190964326	190964376	SOX5	Intron (XM_015094048.1/SOX5, intron 12 of 20)
cg20429727	0.000738636	chr2	144977159	144977209	FIGN	Intron (XM_012135549.2/FIGN, intron 1 of 1)
cg17359136	0.000739889	chr11	50461337	50461387	BAHCC1	Intron (XM_015098920.1/BAHCC1, intron 3 of 38)
cg12336777	0.000744161	chr2	164456519	164456569	ZEB2	Intron (XM_012138277.2/ZEB2, intron 5 of 14)
cg18713298	0.000747263	chr3	63564573	63564623	LOC106991019	Distal Intergenic
cg17485177	0.000748705	chr14	36981088	36981138	LOC105606377	Intron (XR_001435696.1/LOC105606377, intron 2 of 2)
cg06974979	0.000748875	chr3	66131589	66131639	LOC101111446	Distal Intergenic
cg10189682	0.000751243	chr3	41670375	41670425	MEIS1	Intron (XM_012168162.2/MEIS1, intron 7 of 11)
cg07988062	0.000755948	chr14	41682747	41682797	LOC105607554	Distal Intergenic
cg19103271	0.000759153	chr24	41874173	41874223	LOC105604839	Distal Intergenic
cg01726872	0.000762142	chr3	132219128	132219178	HOXC10	Exon (XM_004006284.3/HOXC10, exon 2 of 2)
cg20465666	0.000767786	chr3	132206131	132206181	HOXC9	Exon (XM_004006282.3/HOXC9, exon 2 of 2)
cg18470619	0.000769455	chr9	84914011	84914061	RUNX1T1	3' UTR
cg12469892	0.00077176	chr7	16338339	16338389	TRNAF-GAA	Distal Intergenic
cg01901658	0.000774595	chr10	53862156	53862206	POU4F1	Distal Intergenic
cg03819788	0.000774911	chr2	144517966	144518016	FIGN	Distal Intergenic
cg27010853	0.000775958	chr2	144981288	144981338	FIGN	Exon (XM_012135549.2/FIGN, exon 2 of 2)
cg22185702	0.000779134	chr8	37618471	37618521	FAXC	Distal Intergenic
cg21090817	0.000783789	chr5	85214273	85214323	LOC106991172	Intron (LOC106991172/LOC106991172, intron 3 of 4)
cg11404844	0.000787214	chr2	165623097	165623147	ARHGAP15	Intron (XM_004004720.3/ARHGAP15, intron 6 of 13)
cg02456804	0.000787617	chr1	116099333	116099383	FAM78B	Exon (XM_004002724.3/FAM78B, exon 2 of 2)
cg11772199	0.000787761	chr9	84249741	84249791	TRNAS-AGA	Distal Intergenic
cg24283073	0.000789897	chr3	63171770	63171820	BCL11A	Distal Intergenic
cg23047311	0.00079244	chr18	61656225	61656275	TRNAS-GGA	Distal Intergenic
cg25457539	0.000794016	chr15	63289653	63289703	EHF	Intron (XM_012096218.2/EHF, intron 1 of 8)
cg11498355	0.000798131	chr11	50508896	50508946	LOC106991405	Promoter (<=1kb)
cg08521601	0.000802158	chr9	42256369	42256419	LOC105609787	Distal Intergenic
cg19569703	0.000802346	chr12	71958768	71958818	LOC105609964	Exon (XR_001044199.2/LOC105609964, exon 2 of 2)
cg24799921	0.000808955
cg16238815	0.00081398	chr18	45280055	45280105	LOC106991743	Intron (XR_001436095.1/LOC106991743, intron 1 of 2)
cg05742632	0.000814573	chr1	38132067	38132117	LOC106990797	Distal Intergenic
cg22496127	0.000817361	chr2	165334867	165334917	ARHGAP15	Exon (XM_004004720.3/ARHGAP15, exon 12 of 14)
cg19872412	0.000818906	chr13	23236934	23236984	LOC105612306	Promoter (5-6kb)
cg27526720	0.000819399	chr1	273096927	273096977	SATB1	Distal Intergenic
cg05086458	0.00082323	chr3	94700379	94700429	SPR	Distal Intergenic
cg20795363	0.000827128	chr2	146694335	146694385	DPP4	Exon (XM_012135683.2/DPP4, exon 10 of 27)
cg14382932	0.000827909	chrX	120464438	120464488	FRMPD3	Exon (XM_004022732.3/FRMPD3, exon 11 of 15)
cg05232130	0.000828707	chr5	77012040	77012090	LOC101120408	Intron (XM_015095546.1/LOC101120408, intron 1 of 28)
cg00451044	0.000829333	chr5	77308512	77308562	LOC101120408	Exon (XM_015095546.1/LOC101120408, exon 5 of 29)
cg00720180	0.000831413	chr23	18743812	18743862	LOC105604417	Distal Intergenic
cg02142270	0.00083592	chr5	90591780	90591830	FAM172A	Intron (XM_012178947.2/FAM172A, intron 6 of 10)
cg09200936	0.000843538	chr18	61654015	61654065	TRNAS-GGA	Distal Intergenic
cg20167424	0.000849597	chr20	16777687	16777737	SRF	5' UTR
cg26495931	0.000851388	chr3	63204565	63204615	BCL11A	Exon (XM_012170922.2/BCL11A, exon 2 of 6)
cg03810004	0.000852101	chr17	69577662	69577712	PATZ1	Exon (XM_004017496.3/PATZ1, exon 4 of 6)
cg19625359	0.000852363	chr3	97993321	97993371	LOC105612338	Distal Intergenic
cg15452502	0.000854191	chr2	54665923	54665973	LOC101110483	Distal Intergenic
cg15324373	0.000856556	chr7	63117260	63117310	LOC105610715	Distal Intergenic
cg01951460	0.000859128	chr19	31678472	31678522	MITF	Intron (XM_004018332.2/MITF, intron 2 of 9)
cg16387780	0.000861936
cg10934081	0.000862054	chr17	66965445	66965495	MN1	Distal Intergenic
cg00027863	0.000862127	chr11	26824165	26824215	SENP3	3' UTR
cg08787394	0.000865188	chr2	133499181	133499231	LOC105611827	Distal Intergenic
cg25764105	0.00087345	chr15	60659749	60659799	PAX6	Intron (XM_012096162.1/PAX6, intron 6 of 11)
cg08067367	0.000873519	chr19	45541541	45541591	ERC2	Intron (XM_015102117.1/ERC2, intron 19 of 19)
cg17905888	0.000878815	chr2	152744491	152744541	NR4A2	Distal Intergenic
cg23384377	0.000878889	chr6	80841331	80841381	EPHA5	Exon (XM_015096523.1/EPHA5, exon 5 of 18)
cg19778148	0.000882707	chr18	58503485	58503535	DICER1	Distal Intergenic
cg21630674	0.000882918	chr2	164955494	164955544	GTDC1	Intron (XM_012138353.2/GTDC1, intron 6 of 10)
cg00439253	0.000894788	chr11	48120713	48120763	SMURF2	Exon (XM_015098881.1/SMURF2, exon 9 of 18)
cg05341330	0.000896809	chr13	21753938	21753988	SKIDA1	Distal Intergenic
cg09082371	0.000898109	chr12	17611256	17611306	USH2A	Intron (XM_015099153.1/USH2A, intron 19 of 71)
cg20261774	0.000898497	chr15	43758528	43758578	LMO1	Intron (XM_015101044.1/LMO1, intron 1 of 3)
cg15383487	0.000898833	chr2	165278467	165278517	ARHGAP15	Intron (XM_004004720.3/ARHGAP15, intron 12 of 13)
cg11592089	0.000899593	chr23	43357113	43357163	CEP76	Exon (XM_015103683.1/CEP76, exon 3 of 12)
cg21823557	0.000902275	chr5	58984218	58984268	SLC6A7	Exon (XM_004008971.2/SLC6A7, exon 5 of 14)
cg26016635	0.000906927	chr6	30707836	30707886	GRID2	Exon (XM_004009703.3/GRID2, exon 16 of 16)
cg11102471	0.000907172	chr23	45311915	45311965	SLC14A2	Intron (XM_012103628.2/SLC14A2, intron 2 of 20)
cg21532698	0.000912668	chr7	2999303	2999353	KCNN2	5' UTR
cg27192328	0.000918069	chrX	21136588	21136638	SAT1	Intron (XM_004021966.3/SAT1, intron 3 of 5)
cg05575054	0.000919099	chr22	33435821	33435871	ADRB1	Exon (XM_015103422.1/ADRB1, exon 2 of 3)
cg24150369	0.000920274	chr12	49697661	49697711	SPEN	Exon (XM_015099297.1/SPEN, exon 2 of 18)
cg01662148	0.000923017	chr12	29599419	29599469	SMYD3	Intron (XM_012187175.2/SMYD3, intron 11 of 12)
cg02136286	0.00092446	chr23	24184954	24185004	CCDC178	Intron (XM_012103402.2/CCDC178, intron 18 of 20)
cg14715280	0.000925497	chr13	74896228	74896278	SLC2A10	Distal Intergenic
cg05575208	0.000926919	chr3	132174536	132174586	HOXC5	Exon (XM_004006281.3/HOXC5, exon 3 of 3)
cg14419276	0.000933956	chr19	45298955	45299005	ERC2	Intron (XM_012099885.2/ERC2, intron 16 of 17)
cg03183633	0.000936435	chr3	97993143	97993193	LOC105612338	Distal Intergenic
cg12774429	0.000938468	chr7	22986702	22986752	CHD8	3' UTR
cg02351382	0.00094547	chr17	11225509	11225559	TTC29	Intron (XM_004017213.3/TTC29, intron 9 of 12)
cg21304316	0.000950251	chr8	2175681	2175731	FILIP1	Intron (XM_015097290.1/FILIP1, intron 1 of 6)
cg04478143	0.000950882	chr7	64141650	64141700	SAMD4A	Exon (XM_012181684.1/SAMD4A, exon 5 of 15)
cg18406120	0.000952077	chr5	10509311	10509361	LYL1	Downstream (1-2kb)
cg03675182	0.000953238	chr19	50197098	50197148	RBM5	Exon (XM_004018446.3/RBM5, exon 6 of 25)
cg08496735	0.000956357	chr12	31222162	31222212	ZBTB18	Intron (XM_015099192.1/ZBTB18, intron 1 of 2)
cg21816476	0.000961578	chr7	29189663	29189713	LOC105615668	Distal Intergenic
cg24943275	0.000963751	chr11	24365314	24365364	UBE2G1	3' UTR
cg24872971	0.000965275	chr9	46569831	46569881	NCOA2	Exon (XM_012183833.2/NCOA2, exon 9 of 21)
cg11028837	0.000966737	chr14	37233262	37233312	LOC106991598	Distal Intergenic
cg23178698	0.000967463	chr12	31774882	31774932	SDCCAG8	Intron (XM_004013657.3/SDCCAG8, intron 14 of 17)
cg27258395	0.000975516	chr1	73019727	73019777	PTBP2	Exon (XM_015092131.1/PTBP2, exon 9 of 14)
cg26743515	0.000977266	chr17	59441739	59441789	TBX3	Distal Intergenic
cg20323457	0.000978855	chr4	10002338	10002388	CDK6	Intron (XM_012177413.2/CDK6, intron 4 of 8)
cg04712261	0.000979916	chr2	145084824	145084874	FIGN	Distal Intergenic
cg09702366	0.000992857	chr7	30016185	30016235	LOC105610621	Distal Intergenic
cg20473430	0.000994724	chr5	86059204	86059254	LOC105615321	Distal Intergenic
cg14620903	0.000995079	chr5	44107680	44107730	LOC101104574	Exon (XM_015096050.1/LOC101104574, exon 6 of 9)
cg14830513	0.000997052	chr13	80380946	80380996	LOC105608654	Distal Intergenic
cg19121824	0.000999135	chr23	15601209	15601259	LOC101114074	Distal Intergenic
cg16021982	0.001001233	chr8	28817032	28817082	LACE1	Intron (XM_015097361.1/LACE1, intron 7 of 12)
cg03650138	0.001004065	chr14	52037892	52037942	FOSB	Exon (XM_012190549.2/FOSB, exon 2 of 5)
cg05962837	0.001008019	chr2	164397983	164398033	LOC105609181	Distal Intergenic
cg17803027	0.001008887	chr15	41349725	41349775	EIF4G2	Exon (XM_012096549.1/EIF4G2, exon 5 of 23)
cg02260294	0.001009104	chr23	3536398	3536448	ZNF407	Intron (XM_015103570.1/ZNF407, intron 8 of 9)
cg02153665	0.001010996	chr3	132820038	132820088	SP1	Exon (XM_012174189.2/SP1, exon 4 of 7)
cg25127532	0.001012052	chr22	43644486	43644536	LOC105604337	Promoter (1-2kb)
cg02344882	0.00101453	chr20	23112513	23112563	TFAP2B	Distal Intergenic
cg00045146	0.001017092	chr2	147246481	147246531	TBR1	Distal Intergenic
cg04521819	0.001019144	chr4	91988920	91988970	SND1	Intron (XM_012177455.1/SND1, intron 10 of 27)
cg18406453	0.001021046	chr7	77531430	77531480	ACTN1	Exon (XM_015097138.1/ACTN1, exon 21 of 23)
cg20651417	0.001024395	chr11	37932949	37932999	NFE2L1	Exon (XM_015098735.1/NFE2L1, exon 2 of 7)
cg00282704	0.001029962	chr13	21753965	21754015	SKIDA1	Distal Intergenic
cg17162190	0.001030015	chr15	24141415	24141465	ZBTB16	Intron (XM_012096530.2/ZBTB16, intron 4 of 7)
cg03744408	0.001030739	chr13	65918982	65919032	NNAT	Intron (XM_004014828.3/NNAT, intron 2 of 3)
cg12307359	0.001033119	chr14	41700313	41700363	LOC105607554	Promoter (5-6kb)
cg23797553	0.001035362	chr20	22413486	22413536	DEFB112	Distal Intergenic
cg23764151	0.001042306	chr1	37798551	37798601	ATG4C	Distal Intergenic
cg06952484	0.001043024	chr7	30229145	30229195	TMCO5A	Distal Intergenic
cg07698120	0.001043689	chr1	63527260	63527310	LOC105609233	Distal Intergenic
cg16079333	0.001043954	chr23	54866731	54866781	TCF4	Intron (XM_012103767.2/TCF4, intron 1 of 12)
cg16561874	0.001047561	chr18	56876579	56876629	UNC79	5' UTR
cg18753841	0.001052442	chr15	43364362	43364412	TRIM66	5' UTR
cg10957569	0.001056304	chr1	239052045	239052095	LOC105604038	Intron (XR_001433908.1/LOC105604038, intron 1 of 2)
cg02165311	0.00105861	chr3	97993189	97993239	LOC105612338	Distal Intergenic
cg14454643	0.001061989	chr8	38707336	38707386	LOC105615867	Distal Intergenic
cg07754940	0.001062369	chr22	9530426	9530476	PTEN	Distal Intergenic
cg20817759	0.001062542	chr4	69545693	69545743	LOC106991133	Promoter (2-3kb)
cg23233532	0.001062548	chr2	82418188	82418238	NFIB	Intron (NM_001267879.1/NFIB, intron 1 of 7)
cg21909259	0.001062977	chr3	12161995	12162045	DENND1A	Intron (XM_012163262.2/DENND1A, intron 10 of 20)
cg23434234	0.001068542	chr4	54046195	54046245	FOXP2	Promoter (<=1kb)
cg09244589	0.001068923	chr14	40215597	40215647	ZNF536	Intron (XM_015100543.1/ZNF536, intron 6 of 9)
cg06654037	0.00107383	chr7	29536611	29536661	MEIS2	Distal Intergenic
cg27230145	0.001075513	chr17	62982075	62982125	GIT2	3' UTR
cg13385016	0.0010795	chr6	14901164	14901214	PITX2	3' UTR
cg18295685	0.001079753	chr5	103631352	103631402	EFNA5	Intron (XM_004009108.2/EFNA5, intron 2 of 4)
cg15126562	0.0010854	chr7	29189667	29189717	LOC105615668	Distal Intergenic
cg21407702	0.001085547	chr2	132860515	132860565	HOXD3	Intron (XM_004004563.3/HOXD3, intron 1 of 4)
cg14625962	0.001086581	chr3	85206579	85206629	SRSF7	Intron (XM_012173447.1/SRSF7, intron 3 of 7)
cg14400627	0.001091522	chr8	43034358	43034408	LOC101107027	Distal Intergenic
cg17172158	0.001098035	chr3	197421726	197421776	LOC105613112	Distal Intergenic
cg25162386	0.001099637	chr3	213712610	213712660	MAFF	Exon (XM_015093991.1/MAFF, exon 3 of 4)
cg03774447	0.00110164	chr24	27196627	27196677	BCKDK	Exon (XM_004020920.2/BCKDK, exon 10 of 12)
cg23620526	0.001103251	chr17	13406318	13406368	LOC105602739	Distal Intergenic
cg00474657	0.001104317	chr24	25876391	25876441	SPNS1	Exon (XM_015104149.1/SPNS1, exon 4 of 13)
cg00308763	0.001108101	chr13	66055569	66055619	CTNNBL1	Distal Intergenic
cg23402580	0.001110213	chr3	162130706	162130756	ZBTB39	Exon (XM_015094790.1/ZBTB39, exon 2 of 2)
cg17705149	0.001113767	chr2	32706587	32706637	GAS1	Downstream (1-2kb)
cg03622918	0.001116099
cg05262711	0.001116462	chr24	2275938	2275988	LOC101118752	Exon (XM_015104030.1/LOC101118752, exon 2 of 11)
cg20367539	0.001116929	chr3	46359254	46359304	XPO1	Promoter (<=1kb)
cg02985186	0.001116952	chr9	1748469	1748519	RIMS1	Exon (XM_012184227.2/RIMS1, exon 24 of 39)
cg24260717	0.001118671	chr25	31344457	31344507	C25H10orf11	Intron (XM_012105395.2/C25H10orf11, intron 2 of 5)
cg27166543	0.001119034	chrX	49731797	49731847	KDM5C	Exon (XM_015104892.1/KDM5C, exon 7 of 24)
cg23573900	0.001119624	chr5	48190414	48190464	CXXC5	Intron (XM_015095695.1/CXXC5, intron 1 of 5)
cg15213173	0.001126363	chr10	81007175	81007225	EFNB2	Distal Intergenic
cg15264026	0.001138168	chr22	48196500	48196550	LOC106991861	Promoter (3-4kb)
cg18573296	0.001139294	chr25	31198196	31198246	C25H10orf11	Intron (XM_012105395.2/C25H10orf11, intron 2 of 5)
cg09722599	0.001143842	chr2	223437436	223437486	PAX3	Intron (XM_015093551.1/PAX3, intron 5 of 9)
cg21464565	0.001152607	chr4	68903420	68903470	HOXA2	Intron (XM_004007943.2/HOXA2, intron 1 of 1)
cg20901186	0.001157829	chr13	56012744	56012794	PHACTR3	Exon (XM_004014426.3/PHACTR3, exon 2 of 13)
cg19328475	0.001159684	chr5	28137520	28137570	PRDM6	Intron (XM_015095668.1/PRDM6, intron 4 of 9)
cg15512887	0.001159711	chr9	77033793	77033843	VPS13B	Intron (XM_015097610.1/VPS13B, intron 41 of 60)
cg01371095	0.00116	chr9	13499344	13499394	DGAT1	Promoter (4-5kb)
cg11676114	0.001163222	chr5	67656935	67656985	EBF1	Exon (XM_012178873.2/EBF1, exon 9 of 16)
cg04882125	0.001165773	chr5	67666318	67666368	EBF1	Intron (XM_012178873.2/EBF1, intron 8 of 15)
cg15343900	0.001167178	chr1	273097015	273097065	SATB1	Distal Intergenic
cg02427264	0.001173998	chr15	43808666	43808716	RIC3	Distal Intergenic
cg12436917	0.00117842	chr17	41492419	41492469	GRIA2	Exon (XM_004017290.3/GRIA2, exon 15 of 17)
cg07887749	0.001183698	chr1	10578110	10578160	AGO1	Intron (XM_004001794.2/AGO1, intron 4 of 18)
cg05312831	0.00118913	chr1	64428473	64428523	LOC101113557	Intron (LOC101113557/LOC101113557, intron 2 of 6)
cg23118330	0.001192588	chr3	97598159	97598209	LOC105612338	Distal Intergenic
cg07340207	0.001193879	chr2	165334895	165334945	ARHGAP15	Exon (XM_004004720.3/ARHGAP15, exon 12 of 14)
cg01981662	0.001202666	chr7	29758640	29758690	MEIS2	Exon (XM_012181166.1/MEIS2, exon 4 of 13)
cg24310367	0.001202996	chr2	220519922	220519972	SLC4A3	Intron (XM_012156716.2/SLC4A3, intron 5 of 22)
cg14372662	0.001203598	chr3	7920099	7920149	DNM1	Exon (XM_015094164.1/DNM1, exon 13 of 25)
cg12716758	0.00120419	chr17	7220173	7220223	LRBA	Intron (XM_015101368.1/LRBA, intron 47 of 56)
cg10726346	0.001206801	chr2	82418192	82418242	NFIB	Intron (NM_001267879.1/NFIB, intron 1 of 7)
cg02265245	0.00121059	chrX	36860987	36861037	TRNAS-GGA	Distal Intergenic
cg09084957	0.001211474	chr13	25790847	25790897	FZD8	Distal Intergenic
cg08401998	0.001214145	chr5	44107829	44107879	LOC101104574	Intron (XM_015096048.1/LOC101104574, intron 6 of 8)
cg13145648	0.001214771	chr3	34232596	34232646	SNX17	Intron (XM_012166748.2/SNX17, intron 8 of 15)
cg22469358	0.001216238	chr5	85349984	85350034	LOC101105819	Distal Intergenic
cg04336027	0.001216784	chr1	249743673	249743723	LOC105604262	Distal Intergenic
cg12316900	0.001218305	chr2	246344116	246344166	UBR4	Exon (XM_015092876.1/UBR4, exon 60 of 109)
cg02732915	0.001220723	chr6	94417309	94417359	PRDM8	Intron (XM_015096576.1/PRDM8, intron 1 of 11)
cg14136831	0.001226595	chr16	42099919	42099969	CDH6	Exon (XM_004017072.3/CDH6, exon 11 of 12)
cg13681420	0.001231612	chr11	48048441	48048491	DDX5	Intron (XM_004013032.3/DDX5, intron 11 of 12)
cg23523862	0.001234264	chr1	114537486	114537536	PBX1	Intron (XM_012185380.2/PBX1, intron 2 of 9)
cg12121908	0.001235329	chr2	238614895	238614945	AHDC1	Promoter (9-10kb)
cg21256163	0.00123672	chr3	215349087	215349137	TNRC6B	Exon (XM_012175680.2/TNRC6B, exon 7 of 25)
cg01512145	0.001248856
cg16278770	0.001256838	chr5	90312187	90312237	LOC105607625	Intron (XR_001434644.1/LOC105607625, intron 2 of 8)
cg13493426	0.00125685	chr18	42972734	42972784	NPAS3	Intron (XM_015101805.1/NPAS3, intron 4 of 15)
cg12799992	0.00125954	chr3	98435393	98435443	TMEM182	Distal Intergenic
cg23592313	0.001265648	chr2	164254951	164255001	TRNAC-GCA	Distal Intergenic
cg25856090	0.001274224	chr4	106126307	106126357	CLCN1	Exon (XM_004008136.3/CLCN1, exon 10 of 24)
cg24273108	0.001274957	chr7	46985210	46985260	TRNAC-GCA	Distal Intergenic
cg10400841	0.001285081	chr17	54399788	54399838	CUX2	Intron (XM_015101404.1/CUX2, intron 1 of 25)
cg00485323	0.001285601	chr6	94417319	94417369	PRDM8	Intron (XM_015096576.1/PRDM8, intron 1 of 11)
cg22206913	0.001287029	chr14	26242092	26242142	LOC101101914	Distal Intergenic
cg09914254	0.001287425	chr18	42972486	42972536	NPAS3	Intron (XM_015101805.1/NPAS3, intron 4 of 15)
cg13127008	0.001291323	chr2	57024916	57024966	TRNAF-GAA	Distal Intergenic
cg11800893	0.001293949	chr3	5880803	5880853	PRDM12	Distal Intergenic
cg19233240	0.001296257	chr11	11342498	11342548	BCAS3	Intron (XM_012185238.1/BCAS3, intron 23 of 24)
cg18550730	0.001299869	chr14	39833274	39833324	URI1	Distal Intergenic
cg03064169	0.001304255	chr24	26200399	26200449	YPEL3	Promoter (<=1kb)
cg17712210	0.001307055	chr9	72006734	72006784	ZFPM2	Distal Intergenic
cg12904782	0.001307282	chr24	29865470	29865520	LOC105604757	Distal Intergenic
cg02303671	0.001307538	chr15	25346305	25346355	CADM1	Intron (XM_004016040.3/CADM1, intron 1 of 9)
cg22110364	0.001310551	chr5	48616673	48616723	PURA	Promoter (<=1kb)
cg06105149	0.001310624	chr13	74485993	74486043	SLC35C2	Distal Intergenic
cg08669389	0.0013113	chr3	169702457	169702507	ANO4	5' UTR
cg22386201	0.001315392	chr15	24120456	24120506	ZBTB16	Intron (XM_012096530.2/ZBTB16, intron 4 of 7)
cg06347640	0.001317226	chr20	18297653	18297703	SUPT3H	Intron (XM_015102734.1/SUPT3H, intron 11 of 12)
cg18709938	0.001318249	chr3	12745631	12745681	RC3H2	3' UTR
cg07425439	0.001318888	chr20	11638963	11639013	MDGA1	Distal Intergenic
cg01052727	0.001319007	chr3	63193155	63193205	BCL11A	Promoter (4-5kb)
cg25543045	0.001320513	chr3	171618029	171618079	LOC101122853	Promoter (2-3kb)
cg25091185	0.001322093	chr3	63205316	63205366	BCL11A	Intron (XM_012170922.2/BCL11A, intron 2 of 5)
cg21815808	0.001324117	chr7	16784586	16784636	LOC106991254	Intron (LOC106991254/LOC106991254, intron 2 of 2)
cg19998594	0.001329697	chr15	43729138	43729188	LMO1	Distal Intergenic
cg19241319	0.001336615	chr22	40397358	40397408	FGFR2	Intron (XM_012103036.2/FGFR2, intron 5 of 16)
cg10429476	0.001337488	chr11	45723513	45723563	ITGB3	Exon (XR_001435336.1/ITGB3, exon 4 of 13)
cg23274273	0.001338876	chr26	32092138	32092188	WHSC1L1	3' UTR
cg06878859	0.001340404	chr12	45248463	45248513	CHD5	Exon (XM_012187945.2/CHD5, exon 40 of 42)
cg01844642	0.001342128	chr19	48956391	48956441	GPR62	Exon (XM_015102394.1/GPR62, exon 4 of 10)
cg17368890	0.001345187	chr18	42985753	42985803	NPAS3	Intron (XM_015101805.1/NPAS3, intron 4 of 15)
cg21448578	0.001347934	chr2	144851799	144851849	FIGN	Promoter (1-2kb)
cg09061197	0.001353068	chr1	250983833	250983883	MSL2	Exon (XM_004003317.3/MSL2, exon 2 of 2)
cg10352988	0.001359906	chr3	15390340	15390390	TRNAC-GCA	Distal Intergenic
cg25840909	0.001361238	chr3	191344251	191344301	TRNAC-GCA	Distal Intergenic
cg25921329	0.001366518	chr15	25346295	25346345	CADM1	Intron (XM_004016040.3/CADM1, intron 1 of 9)
cg07451598	0.001368018	chr3	132444387	132444437	CALCOCO1	Distal Intergenic
cg23001868	0.00136853	chr15	25633899	25633949	LOC105602182	Distal Intergenic
cg22672691	0.001371227	chr7	84335173	84335223	GPATCH2L	Distal Intergenic
cg11466492	0.00137926
cg02034779	0.001379878	chr2	245018441	245018491	CAMK2N1	3' UTR
cg13366102	0.001382881	chr2	75841140	75841190	PTPRD	Intron (XM_012125604.1/PTPRD, intron 21 of 32)
cg00253748	0.001385701	chr3	90127439	90127489	FAM98A	Exon (XM_015094441.1/FAM98A, exon 4 of 9)
cg11812236	0.001393328	chr25	30906742	30906792	ZNF503	Promoter (3-4kb)
cg19175169	0.001393439	chr4	54038715	54038765	FOXP2	Intron (XM_012176767.1/FOXP2, intron 1 of 17)
cg19152887	0.001398359	chr1	197660886	197660936	BCL6	Intron (XM_012097363.2/BCL6, intron 1 of 9)
cg09319435	0.001398827	chr12	41032696	41032746	PEX14	Intron (XM_004013728.3/PEX14, intron 7 of 8)
cg01016328	0.001399802	chr16	14196141	14196191	ADAMTS6	Exon (XM_015101273.1/ADAMTS6, exon 11 of 25)
cg00205229	0.001400462	chr2	205060145	205060195	ICOS	Distal Intergenic
cg07992814	0.001401792	chr11	43616320	43616370	GPATCH8	Intron (XM_004012987.3/GPATCH8, intron 2 of 8)
cg15248086	0.001409827	chr7	16338357	16338407	TRNAF-GAA	Distal Intergenic
cg07887935	0.001414914	chr21	8647602	8647652	EED	Exon (XM_015103070.1/EED, exon 12 of 12)
cg25547423	0.001417965	chr5	48190350	48190400	CXXC5	Intron (XM_015095695.1/CXXC5, intron 1 of 5)
cg20872072	0.001418157	chr3	34242297	34242347	PPM1G	Exon (XM_004005766.3/PPM1G, exon 5 of 10)
cg22395399	0.001425753	chr1	273332027	273332077	SATB1	Intron (XM_015092727.1/SATB1, intron 8 of 9)
cg05436467	0.001430288	chr8	36707769	36707819	SIM1	Distal Intergenic
cg20382445	0.00143306	chr11	37932921	37932971	NFE2L1	Exon (XM_015098735.1/NFE2L1, exon 2 of 7)
cg27155698	0.001433976	chr24	41896216	41896266	LOC105604839	Distal Intergenic
cg09208725	0.001434867	chr7	82753093	82753143	LTBP2	Exon (XM_015097181.1/LTBP2, exon 3 of 37)
cg15542784	0.001434954	chr6	60521151	60521201	PHOX2B	Promoter (<=1kb)
cg08309206	0.001439914	chrX	8086634	8086684	MID1	Exon (XM_012106212.2/MID1, exon 2 of 10)
cg22027532	0.001439955	chr1	4909965	4910015	AGAP1	Intron (XM_015091644.1/AGAP1, intron 20 of 25)
cg02349142	0.00144232	chr14	40028061	40028111	ZNF536	Intron (XM_015100543.1/ZNF536, intron 3 of 9)
cg16873794	0.001452938	chr3	24359470	24359520	TRNAC-GCA	Distal Intergenic
cg27558880	0.001465661	chr3	7895444	7895494	DNM1	3' UTR
cg08108903	0.0014672	chrX	37025638	37025688	TRNAS-GGA	Distal Intergenic
cg23899560	0.001468696	chr8	38365158	38365208	LOC105615867	Distal Intergenic
cg21405415	0.001469178	chr25	40554078	40554128	GRID1	Exon (XM_015104304.1/GRID1, exon 2 of 16)
cg06206831	0.001469769	chr17	19146293	19146343	SLC7A11	Exon (XM_015101362.1/SLC7A11, exon 9 of 12)
cg05074718	0.001471186
cg18871253	0.001471717	chr4	54046877	54046927	FOXP2	Promoter (<=1kb)
cg10451735	0.001472518	chr8	47429941	47429991	BACH2	3' UTR
cg06777818	0.001472571	chr5	25802755	25802805	LOC105615239	Distal Intergenic
cg12201660	0.001473044	chr15	30173511	30173561	TRIM29	Promoter (<=1kb)
cg08126247	0.001476318	chr4	54046124	54046174	FOXP2	Promoter (<=1kb)
cg00716140	0.001477515	chrX	22051474	22051524	POLA1	Intron (XM_012106423.2/POLA1, intron 26 of 36)
cg21299277	0.001478779	chr15	74142549	74142599	PHF21A	Intron (XM_012096319.2/PHF21A, intron 7 of 19)
cg00464803	0.001482382	chr7	29758572	29758622	MEIS2	Exon (XM_012181166.1/MEIS2, exon 4 of 13)
cg13259321	0.001485363	chr12	75209697	75209747	NEK7	Intron (XM_012187872.2/NEK7, intron 8 of 8)
cg19578870	0.00149047	chr2	208456173	208456223	LOC105610397	Distal Intergenic
cg22539495	0.001499601	chrX	126708420	126708470	PCDH19	Intron (XM_015104750.1/PCDH19, intron 2 of 5)
cg19261941	0.001500389	chr2	75725778	75725828	PTPRD	Exon (XM_012125604.1/PTPRD, exon 28 of 33)
cg01329059	0.001505116	chr17	62315086	62315136	MSI1	Intron (XM_015101673.1/MSI1, intron 4 of 12)
cg08816243	0.001514454	chr2	165334982	165335032	ARHGAP15	Intron (XM_004004720.3/ARHGAP15, intron 11 of 13)
cg12203266	0.001516009	chr2	55321335	55321385	LOC101111001	Distal Intergenic
cg00192998	0.001521228	chr6	93333563	93333613	PAQR3	Distal Intergenic
cg17541971	0.001526611	chr9	52563635	52563685	ZFHX4	Exon (XM_012183892.2/ZFHX4, exon 2 of 11)
cg03448317	0.001529712	chrX	58563125	58563175	PJA1	Distal Intergenic
cg00160892	0.001530598	chr9	75400000	75400050	GRHL2	Promoter (<=1kb)
cg25277922	0.001531008	chr17	11017301	11017351	TTC29	Distal Intergenic
cg04126866	0.001531845
cg10221974	0.001532055	chr2	164291155	164291205	LOC106990964	Exon (XR_001434136.1/LOC106990964, exon 1 of 3)
cg10352201	0.001536405	chr13	13173157	13173207	TRNAG-UCC	Distal Intergenic
cg24315421	0.001537869	chr12	73550452	73550502	CD34	Distal Intergenic
cg05822427	0.001537947	chr12	41055823	41055873	PEX14	Intron (XM_004013728.3/PEX14, intron 4 of 8)
cg24668676	0.001540779	chr9	53363334	53363384	LOC105613955	Distal Intergenic
cg17410330	0.001542503	chr14	5500462	5500512	WWOX	Intron (XM_012189589.2/WWOX, intron 8 of 8)
cg03917189	0.001545369	chr23	54956339	54956389	TCF4	Intron (XM_015103775.1/TCF4, intron 1 of 15)
cg04437312	0.001547919	chr3	8971752	8971802	RALGPS1	5' UTR
cg17273026	0.001548514	chr3	63209054	63209104	BCL11A	Intron (XM_012170922.2/BCL11A, intron 2 of 5)
cg04175582	0.001550185	chr1	250797157	250797207	STAG1	Exon (XM_012102945.2/STAG1, exon 31 of 34)
cg20996132	0.001550902	chr1	12877922	12877972	LOC105603815	Distal Intergenic
cg23390953	0.001551967	chr4	53718065	53718115	MDFIC	Distal Intergenic
cg26616468	0.001555103	chr7	17071855	17071905	LOC106991254	Distal Intergenic
cg09939588	0.001558958	chr2	164476474	164476524	ZEB2	Intron (XM_012138277.2/ZEB2, intron 7 of 14)
cg18335478	0.001563485	chr2	165863933	165863983	ARHGAP15	Intron (XM_004004720.3/ARHGAP15, intron 2 of 13)
cg17310709	0.001564327	chr14	37478470	37478520	ZFHX3	Intron (XM_015100188.1/ZFHX3, intron 4 of 14)
cg08154911	0.001574605	chr13	74415697	74415747	CDH22	Distal Intergenic
cg23669055	0.00157697	chr25	19127648	19127698	JMJD1C	Exon (XM_012105143.2/JMJD1C, exon 5 of 22)
cg19020638	0.001577576	chrX	125407989	125408039	HNRNPH2	Exon (XM_004022489.3/HNRNPH2, exon 2 of 2)
cg09879581	0.001578446	chr17	62314995	62315045	MSI1	Intron (XM_015101673.1/MSI1, intron 4 of 12)
cg07475226	0.001578541	chr18	48107661	48107711	FBXO33	3' UTR
cg23582869	0.001581262	chr1	110574083	110574133	USP21	Exon (XM_004002686.3/USP21, exon 8 of 13)
cg09051526	0.0015855	chrX	37376461	37376511	LOC105605432	Promoter (6-7kb)
cg27109284	0.00158713	chr11	38348836	38348886	NPEPPS	Exon (XM_012185997.2/NPEPPS, exon 16 of 23)
cg15260786	0.001588668	chr4	79933692	79933742	INHBA	Distal Intergenic
cg26514079	0.001590916	chr17	7055123	7055173	LRBA	5' UTR
cg03902953	0.001595594	chr1	272751494	272751544	TBC1D5	Distal Intergenic
cg07592240	0.001602199	chr7	29657287	29657337	MEIS2	Intron (XM_012181166.1/MEIS2, intron 9 of 12)
cg19978750	0.001613159	chr9	52524614	52524664	LOC106991349	Exon (XR_001435130.1/LOC106991349, exon 1 of 3)
cg23311800	0.001616184	chr15	63140806	63140856	ELF5	Promoter (<=1kb)
cg21390110	0.001623229	chrX	38474160	38474210	DDX3X	Exon (XM_004022011.2/DDX3X, exon 5 of 17)
cg07969888	0.001635859	chr25	29490094	29490144	CAMK2G	Exon (XM_015104453.1/CAMK2G, exon 20 of 25)
cg20754348	0.001642729	chr18	9704929	9704979	NR2F2	Promoter (<=1kb)
cg04709860	0.001644828	chr2	164397856	164397906	LOC105609181	Distal Intergenic
cg26163340	0.001645894	chr6	58172713	58172763	KLHL5	5' UTR
cg02135089	0.001657033	chr3	12029669	12029719	DENND1A	Intron (XM_012163262.2/DENND1A, intron 8 of 20)
cg13434217	0.001658797	chr3	191159340	191159390	SOX5	Intron (XM_015094048.1/SOX5, intron 19 of 20)
cg17003414	0.001659566	chr25	19587996	19588046	LOC101122571	Distal Intergenic
cg08483626	0.001661499	chr1	67256871	67256921	BARHL2	Distal Intergenic
cg15889617	0.001662053	chr14	47115520	47115570	DPF1	Exon (XM_012095023.2/DPF1, exon 3 of 12)
cg14935719	0.00166852	chr19	52391118	52391168	SETD2	Exon (XM_015102456.1/SETD2, exon 3 of 21)
cg26777164	0.001671633	chr19	39476113	39476163	PTPRG	Intron (XM_012100343.2/PTPRG, intron 2 of 30)
cg02697105	0.001672945	chr9	33975843	33975893	ST18	Intron (XM_012183688.2/ST18, intron 2 of 24)
cg04696116	0.001680649	chr3	63348616	63348666	LOC101111184	Distal Intergenic
cg26637809	0.00168207	chr2	132902291	132902341	HOXD10	Promoter (<=1kb)
cg09827655	0.001694022	chr5	48536454	48536504	NRG2	Intron (XM_015096070.1/NRG2, intron 1 of 14)
cg19226790	0.001695007	chr11	7950249	7950299	MSI2	Intron (XM_015098295.1/MSI2, intron 6 of 13)
cg20823348	0.001695477	chr3	97386557	97386607	LOC105612338	Distal Intergenic
cg18889628	0.001701661	chr1	95061885	95061935	LOC105610669	Distal Intergenic
cg06887993	0.00170917	chr1	215767591	215767641	MECOM	Intron (XM_012099727.1/MECOM, intron 1 of 15)
cg15408048	0.001712611	chr17	7054967	7055017	LRBA	Intron (XM_015101368.1/LRBA, intron 37 of 56)
cg19245883	0.001714572	chr25	32622703	32622753	KCNMA1	Exon (NM_001303455.1/KCNMA1, exon 8 of 26)
cg26283610	0.001720451	chr20	16779831	16779881	SRF	Exon (XM_012100695.2/SRF, exon 3 of 6)
cg09133026	0.001726112
cg02188837	0.001726747	chrX	37052094	37052144	LOC106991980	Distal Intergenic
cg08845119	0.001729597	chr2	145084748	145084798	FIGN	Distal Intergenic
cg07948593	0.001731427	chr14	40028068	40028118	ZNF536	Intron (XM_015100543.1/ZNF536, intron 3 of 9)
cg20283446	0.00173187	chr3	9824189	9824239	TRNAC-ACA	Distal Intergenic
cg13219590	0.001732749	chr18	60466616	60466666	LOC105603248	Distal Intergenic
cg23939132	0.00173293	chr5	100651649	100651699	LOC105609312	Distal Intergenic
cg12539415	0.001733892	chr2	132867942	132867992	MIR10B	Downstream (<1kb)
cg24103182	0.001748244	chr23	54952270	54952320	TCF4	5' UTR
cg13076030	0.001750003	chr18	60319563	60319613	VRK1	Intron (XM_015102041.1/VRK1, intron 11 of 12)
cg05822075	0.001751177	chr14	4774332	4774382	WWOX	Intron (XM_012189589.2/WWOX, intron 5 of 8)
cg21525549	0.001752426	chr25	42737237	42737287	LRRC18	Distal Intergenic
cg03545606	0.001757886	chr19	23174646	23174696	CNTN4	Exon (XM_012099628.2/CNTN4, exon 14 of 23)
cg00705684	0.001761139	chr13	44350801	44350851	LOC105616708	Distal Intergenic
cg27659622	0.001763559	chr8	29325340	29325390	SCML4	Promoter (<=1kb)
cg08802662	0.001764978	chr3	202300253	202300303	LRP6	Exon (XM_004006856.3/LRP6, exon 12 of 23)
cg24124633	0.001767981	chr6	60522520	60522570	PHOX2B	Promoter (1-2kb)
cg20887518	0.0017689	chrX	77631386	77631436	SLC6A8	Exon (XM_015104724.1/SLC6A8, exon 2 of 11)
cg09160780	0.001769597	chrX	58295216	58295266	EFNB1	Exon (XM_015104707.1/EFNB1, exon 2 of 5)
cg15680153	0.001774423	chr7	29758261	29758311	MEIS2	Intron (XM_012181166.1/MEIS2, intron 4 of 12)
cg17100901	0.001774659	chr25	32622521	32622571	KCNMA1	Intron (NM_001303455.1/KCNMA1, intron 8 of 25)
cg18336804	0.001774716	chr24	26851528	26851578	SRCAP	Exon (XM_004020909.3/SRCAP, exon 16 of 36)
cg18361975	0.001775447	chr5	103631524	103631574	EFNA5	Intron (XM_004009108.2/EFNA5, intron 2 of 4)
cg26795581	0.00177645	chr20	17012868	17012918	DLK2	Exon (XM_012101442.1/DLK2, exon 3 of 6)
cg23194329	0.001778265	chr3	63205367	63205417	BCL11A	Intron (XM_012170922.2/BCL11A, intron 2 of 5)
cg26030946	0.001781256	chr15	60193299	60193349	LOC101111830	Intron (XM_012096149.2/LOC101111830, intron 5 of 37)
cg05993392	0.001785571	chr2	133452175	133452225	LOC105611827	Distal Intergenic
cg00505445	0.001788155	chr6	12436411	12436461	ANK2	Exon (XM_012179470.2/ANK2, exon 12 of 48)
cg00147440	0.00179136	chr22	48137366	48137416	EBF3	Intron (XM_015103504.1/EBF3, intron 2 of 13)
cg04927173	0.001792634
cg26923395	0.001794271	chr1	215767769	215767819	MECOM	Intron (XM_012099727.1/MECOM, intron 1 of 15)
cg12185185	0.001798541	chr3	190753013	190753063	SOX5	Intron (XM_015094048.1/SOX5, intron 6 of 20)
cg24888049	0.00180229
cg09082380	0.00180264
cg05424177	0.001804963	chr2	16840590	16840640	LOC105606824	Promoter (<=1kb)
cg21977706	0.001811231	chr21	28040041	28040091	PKNOX2	Exon (XM_004019514.2/PKNOX2, exon 9 of 12)
cg16675333	0.00181522	chr12	13195935	13195985	BRINP3	Exon (XM_004013591.2/BRINP3, exon 2 of 8)
cg23276686	0.001821412	chr1	103014914	103014964	UBAP2L	Exon (XM_012182307.2/UBAP2L, exon 25 of 28)
cg23627331	0.001821599	chr2	146527316	146527366	FAP	Intron (XM_004004657.3/FAP, intron 19 of 25)
cg19090360	0.001825186	chr12	67603514	67603564	PROX1	Intron (XM_015099370.1/PROX1, intron 4 of 4)
cg09662648	0.001834044	chr11	20019848	20019898	TIAF1	Downstream (2-3kb)
cg14368225	0.001837945	chr15	78988910	78988960	CNTF	Promoter (<=1kb)
cg08347768	0.001839524	chr506	10782	10832	LOC101121080	Exon (XM_012108199.2/LOC101121080, exon 3 of 4)
cg19024342	0.00184511	chr12	31209017	31209067	LOC105607281	Distal Intergenic
cg24100081	0.001853562	chr24	21851036	21851086	PRKCB	Intron (XM_015103894.1/PRKCB, intron 13 of 17)
cg10856741	0.001857985	chr5	36463446	36463496	FAM193B	5' UTR
cg27383210	0.001858097	chr24	26359238	26359288	KCTD13	Exon (XM_004020890.2/KCTD13, exon 4 of 6)
cg18439414	0.001859583	chr7	76187478	76187528	TMEM229B	Exon (XM_012181872.2/TMEM229B, exon 2 of 2)
cg25168196	0.001862781	chr1	67354659	67354709	BARHL2	Distal Intergenic
cg09172296	0.001867777	chr13	21774382	21774432	SKIDA1	Intron (XM_015099570.1/SKIDA1, intron 1 of 7)
cg19580159	0.001868638	chr2	42673576	42673626	PEBP4	Intron (XM_012119233.2/PEBP4, intron 4 of 6)
cg27296662	0.001873697	chr19	30658323	30658373	FOXP1	3' UTR
cg08004469	0.00187442	chr5	90344095	90344145	NR2F1	Distal Intergenic
cg22600157	0.001876697	chr4	27453345	27453395	TRNAS-GGA	Distal Intergenic
cg17499276	0.001878076	chr17	54531898	54531948	CUX2	Intron (XM_015101404.1/CUX2, intron 1 of 25)
cg15955330	0.001879963	chr7	29758645	29758695	MEIS2	Exon (XM_012181166.1/MEIS2, exon 4 of 13)
cg22072727	0.001880432	chr2	150061263	150061313	PKP4	5' UTR
cg00362836	0.001882738	chr11	30504482	30504532	MYOCD	Distal Intergenic
cg26965214	0.001882946
cg08566952	0.001883528	chr5	90344003	90344053	NR2F1	Distal Intergenic
cg26107989	0.001884458	chr1	21750989	21751039	FOXD2	Distal Intergenic
cg16903978	0.001885219	chrX	97375356	97375406	RAP2C	Exon (XM_004022341.2/RAP2C, exon 2 of 3)
cg16282799	0.001886942	chr3	99631193	99631243	MAP4K4	Intron (XM_012173748.2/MAP4K4, intron 20 of 28)
cg04388989	0.001888181	chr14	39948284	39948334	ZNF536	Promoter (<=1kb)
cg03523528	0.001889793	chr5	48190359	48190409	CXXC5	Intron (XM_015095695.1/CXXC5, intron 1 of 5)
cg25911271	0.001889901	chrX	98371689	98371739	LOC105605586	Promoter (8-9kb)
cg20785522	0.001892909	chr2	75517532	75517582	LOC106990943	Distal Intergenic
cg26589497	0.001898499	chr5	48616692	48616742	PURA	Promoter (<=1kb)
cg05764166	0.001906325	chr11	6829240	6829290	ANKFN1	Exon (XM_015098439.1/ANKFN1, exon 17 of 17)
cg19480695	0.001907205	chr9	50230361	50230411	JPH1	3' UTR
cg18309798	0.001910931	chr17	53405741	53405791	ANAPC5	Exon (XM_004017352.3/ANAPC5, exon 8 of 17)
cg08113048	0.001911101	chr1	19079853	19079903	RNF220	Intron (XM_004001902.2/RNF220, intron 14 of 14)
cg23845594	0.0019151	chr1	177674732	177674782	LOC105602007	Intron (XR_001020604.2/LOC105602007, intron 4 of 6)
cg14004899	0.001917613	chr20	47812089	47812139	NRN1	Exon (XM_004019145.3/NRN1, exon 2 of 3)
cg19465016	0.001919025	chr3	63387738	63387788	LOC101111184	Promoter (9-10kb)
cg01342051	0.001921387	chr3	132157674	132157724	HOXC4	Promoter (2-3kb)
cg07171305	0.001926573	chr23	24643547	24643597	KLHL14	Intron (XM_015103607.1/KLHL14, intron 4 of 10)
cg23774400	0.001931706	chr4	79026469	79026519	GLI3	Intron (XM_012177448.1/GLI3, intron 11 of 17)
cg07887668	0.001939219	chr11	28092655	28092705	NTN1	Intron (XM_015098644.1/NTN1, intron 5 of 9)
cg05864181	0.001946299	chr7	16952934	16952984	LOC106991254	Distal Intergenic
cg20168721	0.001951158	chr4	72259375	72259425	ADAM22	Exon (XM_012176916.2/ADAM22, exon 26 of 28)
cg24864887	0.001954633	chr18	30615718	30615768	ISL2	Downstream (1-2kb)
cg13731731	0.001955313	chr3	94700300	94700350	SPR	Distal Intergenic
cg04677859	0.001960937	chr1	103688066	103688116	ZBTB7B	Intron (XM_012182605.1/ZBTB7B, intron 2 of 4)
cg15008665	0.001964516	chr6	41098770	41098820	KCNIP4	Exon (XM_004009735.3/KCNIP4, exon 1 of 8)
cg14887057	0.001968227	chr2	164223264	164223314	TRNAC-GCA	Distal Intergenic
cg16698149	0.001968676	chr6	93929693	93929743	GK2	Distal Intergenic
cg24786986	0.001970872	chr4	54046883	54046933	FOXP2	Promoter (<=1kb)
cg05571800	0.001971882	chr23	24421465	24421515	CCDC178	3' UTR
cg24531498	0.001977022	chr4	53678556	53678606	MDFIC	Distal Intergenic
cg27276869	0.001983158	chr5	90324464	90324514	NR2F1	Intron (XM_012179315.2/NR2F1, intron 2 of 4)
cg14381766	0.001991745	chr7	59104166	59104216	SLC12A1	Exon (XM_012181626.2/SLC12A1, exon 5 of 29)
cg26129558	0.001994887	chr1	99129574	99129624	APH1A	Exon (XM_004002443.3/APH1A, exon 4 of 7)
cg23829949	0.001996975	chr12	31222990	31223040	ZBTB18	Intron (XM_015099192.1/ZBTB18, intron 1 of 2)
cg27172433	0.002009092	chr14	36990432	36990482	LOC105606377	Intron (XR_001435696.1/LOC105606377, intron 2 of 2)
cg21610467	0.002009262
cg18826401	0.002014837	chr8	38532565	38532615	LOC105615867	Distal Intergenic
cg00039845	0.002021463	chr7	84226228	84226278	IFT43	Intron (XM_012182109.2/IFT43, intron 5 of 10)
cg19252313	0.002027252	chr7	20651604	20651654	PCK2	Exon (XM_015096868.1/PCK2, exon 5 of 10)
cg14768906	0.002029181	chr2	182575625	182575675	LOC105609891	Promoter (<=1kb)
cg23490170	0.002034525	chr24	41874184	41874234	LOC105604839	Distal Intergenic
cg14720152	0.002043631	chr1	215568145	215568195	LOC105603457	Downstream (1-2kb)
cg13644292	0.002055394	chr11	12847622	12847672	LHX1	Exon (XM_015098297.1/LHX1, exon 3 of 6)
cg21674101	0.002057791	chr3	179541733	179541783	EIF3D	Exon (XM_004006721.2/EIF3D, exon 14 of 15)
cg14880389	0.002059847	chr3	212500487	212500537	CACNA1C	Exon (XM_015095005.1/CACNA1C, exon 28 of 52)
cg20934494	0.002063191	chr1	66956428	66956478	LOC443297	Distal Intergenic
cg16371301	0.002063213	chr3	63158913	63158963	BCL11A	Distal Intergenic
cg12051857	0.002071327	chr12	40978525	40978575	CASZ1	Intron (XM_015099220.1/CASZ1, intron 2 of 14)
cg02211646	0.002073844	chr4	54046804	54046854	FOXP2	Promoter (<=1kb)
cg04084590	0.002081214	chr14	37390422	37390472	LOC105616868	Promoter (3-4kb)
cg02886263	0.002081709	chr24	13217191	13217241	LOC106991910	Intron (XR_001436654.1/LOC106991910, intron 1 of 1)
cg16526227	0.002084175	chr1	88314258	88314308	KCND3	Intron (XM_004002324.3/KCND3, intron 2 of 7)
cg00281833	0.002098976	chr18	1384926	1384976	UBE3A	Intron (XM_012098301.1/UBE3A, intron 2 of 11)
cg21876626	0.002101405	chr7	22865235	22865285	SALL2	Promoter (<=1kb)
cg03209410	0.002111327	chr2	164397866	164397916	LOC105609181	Distal Intergenic
cg20484843	0.002122854	chr22	41138754	41138804	PLEKHA1	3' UTR
cg25682618	0.002144156	chr9	36060628	36060678	PLAG1	Exon (XM_012183720.1/PLAG1, exon 2 of 3)
cg13254355	0.002145968	chr5	85674362	85674412	MEF2C	Intron (XM_012177544.2/MEF2C, intron 2 of 10)
cg09672745	0.002146324	chr4	46712133	46712183	ATXN7L1	Exon (XM_012176688.1/ATXN7L1, exon 10 of 13)
cg25609082	0.002152509	chr1	10090813	10090863	ZMYM4	Exon (XM_015091852.1/ZMYM4, exon 7 of 30)
cg01656588	0.00215583	chr16	69597537	69597587	LOC105602652	Distal Intergenic
cg24988263	0.002156667	chr5	10576755	10576805	NFIX	Intron (XM_012177827.1/NFIX, intron 2 of 10)
cg20331456	0.002162139	chr2	88437334	88437384	MLLT3	Intron (XM_012126879.2/MLLT3, intron 2 of 10)
cg23681938	0.002162189	chr23	20022393	20022443	CELF4	Exon (XM_015103589.1/CELF4, exon 9 of 11)
cg25016190	0.0021956	chr1	64064585	64064635	LOC105609236	Distal Intergenic
cg04083183	0.002197577	chr22	32734934	32734984	HABP2	Distal Intergenic
cg26711820	0.002202777	chr3	116445058	116445108	MYF6	Promoter (<=1kb)
cg05059566	0.002211187
cg24499125	0.002212726	chr14	40936580	40936630	TSHZ3	Distal Intergenic
cg25411330	0.002219668	chr14	55031107	55031157	TSKS	Exon (XM_004015379.3/TSKS, exon 11 of 12)
cg12067566	0.002220197	chr26	25270793	25270843	RBPMS	Intron (XM_015104589.1/RBPMS, intron 4 of 6)
cg17970179	0.002222167	chr23	47365455	47365505	SKOR2	Distal Intergenic
cg21566778	0.002224698	chr13	62613070	62613120	TRNAG-UCC	Distal Intergenic
cg13660589	0.002230633	chr1	73019547	73019597	PTBP2	Intron (XM_015092131.1/PTBP2, intron 8 of 13)
cg22666763	0.002231385	chr3	9883145	9883195	TRNAC-ACA	Distal Intergenic
cg25718356	0.00223153	chrX	37376381	37376431	LOC105605432	Promoter (6-7kb)
cg14113273	0.002233949	chr22	42054981	42055031	GPR26	Distal Intergenic
cg01550545	0.002234791	chr1	36320145	36320195	NFIA	Intron (XM_012160811.2/NFIA, intron 10 of 10)
cg16423684	0.002242956	chr25	31198182	31198232	C25H10orf11	Intron (XM_012105395.2/C25H10orf11, intron 2 of 5)
cg24677551	0.002247327	chr1	19079826	19079876	RNF220	Intron (XM_004001902.2/RNF220, intron 14 of 14)
cg15249459	0.00225594	chr15	50033893	50033943	CLPB	Intron (XM_012096002.1/CLPB, intron 4 of 14)
cg00887982	0.002257263	chr3	90127484	90127534	FAM98A	Exon (XM_015094441.1/FAM98A, exon 4 of 9)
cg17020611	0.002261597	chr2	165335592	165335642	ARHGAP15	Intron (XM_004004720.3/ARHGAP15, intron 11 of 13)
cg17823480	0.002265076	chr24	41874223	41874273	LOC105604839	Distal Intergenic
cg04512256	0.00226782	chr2	44185858	44185908	LOC101120470	Distal Intergenic
cg25425140	0.002269695	chr1	238889577	238889627	LOC105604038	Distal Intergenic
cg23003419	0.002271078	chr1	36320310	36320360	NFIA	Intron (XM_012160811.2/NFIA, intron 10 of 10)
cg04349571	0.00227599	chr15	59420134	59420184	MPPED2	5' UTR
cg08906488	0.002276026	chr22	36745737	36745787	EMX2	Downstream (1-2kb)
cg09205502	0.002282794
cg00504554	0.002290929	chr3	63286719	63286769	BCL11A	Exon (XM_012170922.2/BCL11A, exon 4 of 6)
cg09252678	0.00229244	chr19	18579016	18579066	GRM7	3' UTR
cg26969159	0.002297512	chr11	46400837	46400887	TLK2	3' UTR
cg17871502	0.002313986	chr1	24934409	24934459	FAF1	Exon (XM_004001957.3/FAF1, exon 7 of 19)
cg17310766	0.002321926	chr8	37618299	37618349	FAXC	Distal Intergenic
cg13809900	0.002327108	chr2	91146765	91146815	LOC105608392	Distal Intergenic
cg26205938	0.002333189	chr17	66965522	66965572	MN1	Distal Intergenic
cg20360144	0.002338104	chr1	64636132	64636182	LOC101113557	Distal Intergenic
cg16429074	0.002340805	chr7	30229138	30229188	TMCO5A	Distal Intergenic
cg08168552	0.002342242	chr1	24803699	24803749	FAF1	Intron (XM_004001957.3/FAF1, intron 12 of 18)
cg01423660	0.002342595	chr2	165085673	165085723	LOC101123186	Promoter (3-4kb)
cg25719814	0.002348391	chr2	36977246	36977296	FAM219A	Exon (XM_015093068.1/FAM219A, exon 2 of 6)
cg17604804	0.002349266	chr2	30693824	30693874	PTCH1	Intron (XM_012116602.2/PTCH1, intron 16 of 24)
cg00758337	0.002350393	chr2	51511273	51511323	PAX5	Intron (XM_012120994.2/PAX5, intron 6 of 8)
cg14122415	0.002353383	chr12	22402660	22402710	LOC101123651	Distal Intergenic
cg16121787	0.002356181	chr2	91408609	91408659	ELAVL2	Exon (XM_012127430.2/ELAVL2, exon 4 of 6)
cg17025741	0.002363558	chr6	12114459	12114509	CAMK2D	Exon (XM_004009600.3/CAMK2D, exon 6 of 21)
cg12951432	0.002366222	chr6	58172724	58172774	KLHL5	5' UTR
cg06946028	0.002372942	chr22	6702487	6702537	PRKG1	3' UTR
cg09276953	0.002374103	chr3	63193289	63193339	BCL11A	Promoter (4-5kb)
cg12616148	0.002375214	chr1	138929666	138929716	TRNAS-GGA	Distal Intergenic
cg00516349	0.002376727	chr9	77491589	77491639	VPS13B	Intron (XM_015097610.1/VPS13B, intron 18 of 60)
cg03513784	0.002382702	chr2	39543417	39543467	EBF2	Intron (XM_004004175.3/EBF2, intron 6 of 15)
cg02293439	0.002383441	chr13	51673256	51673306	EBF4	Intron (XM_015099748.1/EBF4, intron 6 of 16)
cg23980428	0.002385576	chr25	31499880	31499930	C25H10orf11	Intron (XM_012105395.2/C25H10orf11, intron 2 of 5)
cg23023864	0.002391323	chr2	164519354	164519404	ZEB2	Exon (XM_012138277.2/ZEB2, exon 15 of 15)
cg00038849	0.002393705	chr1	215664834	215664884	MECOM	Intron (XM_012099727.1/MECOM, intron 1 of 15)
cg07027528	0.002411739	chr23	24355278	24355328	CCDC178	Intron (XM_012103402.2/CCDC178, intron 19 of 20)
cg06336711	0.00241791	chr8	39149592	39149642	LOC105611309	Intron (XR_001435020.1/LOC105611309, intron 2 of 4)
cg12160807	0.002419591	chr22	22122005	22122055	GBF1	5' UTR
cg00640107	0.002422413	chr1	13788189	13788239	MACF1	Exon (XM_015091883.1/MACF1, exon 53 of 100)
cg05714931	0.00242287	chr4	39107998	39108048	LOC105607851	Distal Intergenic
cg19169532	0.002438658	chr23	24421370	24421420	CCDC178	3' UTR
cg18351805	0.002440177	chr15	41349789	41349839	EIF4G2	Exon (XM_012096549.1/EIF4G2, exon 5 of 23)
cg18111458	0.002447582	chr17	17463526	17463576	MAML3	Intron (XM_015101388.1/MAML3, intron 2 of 5)
cg25450666	0.002453098	chr24	30093637	30093687	LOC105604757	Distal Intergenic
cg06971594	0.002457957	chr1	59947485	59947535	TRNAC-ACA	Distal Intergenic
cg13642593	0.00245861	chr3	132444324	132444374	CALCOCO1	Distal Intergenic
cg24067003	0.002466101	chr4	5528077	5528127	IKZF1	Intron (XM_015095178.1/IKZF1, intron 2 of 11)
cg15578568	0.002466588	chr17	7220251	7220301	LRBA	Intron (XM_015101368.1/LRBA, intron 47 of 56)
cg20912514	0.002468312	chr14	48210530	48210580	SUPT5H	Exon (XM_004015248.3/SUPT5H, exon 15 of 29)
cg03886135	0.00247325	chr22	30241486	30241536	RBM20	Exon (XM_015103413.1/RBM20, exon 7 of 16)
cg11917424	0.002477468	chr14	26008493	26008543	LOC101123489	Distal Intergenic
cg12241489	0.002481681	chr3	64839898	64839948	LOC105612568	Intron (XR_001434300.1/LOC105612568, intron 3 of 4)
cg26223723	0.002482395	chr5	76556015	76556065	LOC106990422	Intron (XM_015095547.1/LOC106990422, intron 3 of 3)
cg05272217	0.002485193	chr22	37427808	37427858	LOC105604312	Intron (XR_001436533.1/LOC105604312, intron 1 of 2)
cg01380208	0.002490241	chr8	38652181	38652231	LOC105615867	Intron (XR_001435019.1/LOC105615867, intron 1 of 1)
cg02644056	0.002491776	chr17	7070392	7070442	LRBA	Exon (XM_004017205.3/MAB21L2, exon 1 of 1)
cg06520878	0.002506402
cg03453025	0.002508056
cg20583171	0.002513076	chr2	223437656	223437706	PAX3	Intron (XM_015093551.1/PAX3, intron 5 of 9)
cg05693178	0.002526913	chr3	169711372	169711422	ANO4	Exon (XM_015094820.1/ANO4, exon 9 of 28)
cg15576133	0.002528326	chr8	38024812	38024862	FBXL4	Distal Intergenic
cg27238548	0.002535126	chr18	20558141	20558191	ZNF710	Exon (XM_015101889.1/ZNF710, exon 7 of 10)
cg12827760	0.002539396	chr12	22402653	22402703	LOC101123651	Distal Intergenic
cg26373307	0.00255396	chr22	21239075	21239125	BTRC	Distal Intergenic
cg08756526	0.002579473	chr3	9883133	9883183	TRNAC-ACA	Distal Intergenic
cg18678822	0.00258153	chr2	154169032	154169082	GALNT13	Exon (XM_004004690.3/GALNT13, exon 8 of 13)
cg00077617	0.002586093	chr17	7070339	7070389	LRBA	Exon (XM_004017205.3/MAB21L2, exon 1 of 1)
cg10213224	0.002588304	chr1	114537617	114537667	PBX1	Intron (XM_012185380.2/PBX1, intron 2 of 9)
cg05176833	0.002592538	chr19	49374914	49374964	DOCK3	Exon (XM_015102402.1/DOCK3, exon 47 of 53)
cg12997561	0.002593212	chr8	37804480	37804530	FBXL4	Distal Intergenic
cg15724758	0.002596657	chr19	29296927	29296977	RYBP	Exon (XM_015102137.1/RYBP, exon 5 of 5)
cg02285637	0.002597368	chr5	10509141	10509191	LYL1	Downstream (1-2kb)
cg23437216	0.002598523	chr3	136773383	136773433	LMBR1L	Exon (XM_012174350.2/LMBR1L, exon 16 of 17)
cg12099383	0.002605329	chr3	217815344	217815394	SCUBE1	Intron (XM_015094004.1/SCUBE1, intron 7 of 26)
cg18819444	0.002617265	chr1	64064543	64064593	LOC105609236	Distal Intergenic
cg25135002	0.00262238	chr19	30576586	30576636	FOXP1	Intron (XM_015102109.1/FOXP1, intron 7 of 17)
cg23693668	0.002624444	chr6	98032875	98032925	TRNAS-GGA	Distal Intergenic
cg21450888	0.002629063	chr12	37693914	37693964	DNM3	Intron (XM_015099209.1/DNM3, intron 15 of 21)
cg16315022	0.002641693	chr1	72747590	72747640	PTBP2	Distal Intergenic
cg09760769	0.002643659	chr2	134709090	134709140	OLA1	Intron (XM_012133444.2/OLA1, intron 4 of 10)
cg22613390	0.002646287	chr2	54788631	54788681	LOC101110740	Intron (XM_015093166.1/LOC101110740, intron 4 of 19)
cg04516741	0.002647311	chr7	14445510	14445560	SKOR1	Intron (XM_015096709.1/SKOR1, intron 8 of 9)
cg16987712	0.002654521	chr3	11617115	11617165	LHX2	3' UTR
cg04969475	0.002656913	chrX	42008080	42008130	KDM6A	Exon (XM_015104862.1/KDM6A, exon 14 of 31)
cg13885773	0.002662846	chr20	15225807	15225857	LOC105603703	Distal Intergenic
cg11555420	0.002664013
cg15366562	0.002665665	chr14	22313944	22313994	LOC105608131	Distal Intergenic
cg02308434	0.00267244	chr3	134148422	134148472	FIGNL2	5' UTR
cg00185982	0.002681442	chr3	81864354	81864404	LOC106991055	Distal Intergenic
cg20267980	0.002681618	chr14	25662962	25663012	CNOT1	Exon (XM_004015040.2/CNOT1, exon 42 of 49)
cg05278305	0.002681759	chr19	57133507	57133557	NR2C2	Exon (XM_015102482.1/NR2C2, exon 4 of 13)
cg21159131	0.002683662	chr23	41051749	41051799	PTPRM	Exon (XM_012103562.2/PTPRM, exon 16 of 37)
cg23593476	0.002686888	chr18	62777156	62777206	BCL11B	Intron (XM_015101817.1/BCL11B, intron 2 of 7)
cg00689651	0.002688588	chr5	10508691	10508741	LYL1	Distal Intergenic
cg23505231	0.002689722	chr1	88338303	88338353	KCND3	Intron (XM_004002324.3/KCND3, intron 2 of 7)
cg15928699	0.002690435	chr22	20857805	20857855	SLF2	Distal Intergenic
cg05454653	0.00269248	chr2	183122940	183122990	EN1	Promoter (<=1kb)
cg11015411	0.002695059	chr2	57965349	57965399	PSAT1	Distal Intergenic
cg14882356	0.002697716	chr2	197504267	197504317	HECW2	Exon (XM_012141142.1/HECW2, exon 8 of 23)
cg06922131	0.002702391	chr25	33772521	33772571	LOC105605020	Distal Intergenic
cg17133703	0.00270288	chr1	88314243	88314293	KCND3	Intron (XM_004002324.3/KCND3, intron 2 of 7)
cg09461098	0.002704426	chr24	22483548	22483598	TNRC6A	Exon (XR_001436661.1/TNRC6A, exon 19 of 25)
cg13889775	0.00270955	chr15	24192616	24192666	ZBTB16	Intron (XM_012096530.2/ZBTB16, intron 5 of 7)
cg03517402	0.002713133	chr8	36707765	36707815	SIM1	Distal Intergenic
cg20258476	0.0027154	chr2	54150200	54150250	LOC101110483	Distal Intergenic
cg13589316	0.002720228	chr3	97896365	97896415	LOC105612338	Distal Intergenic
cg16825020	0.002721279	chr1	38001882	38001932	LOC106990797	Distal Intergenic
cg20040765	0.002723184	chr9	43393873	43393923	ADHFE1	Intron (XM_012183779.2/ADHFE1, intron 5 of 12)
cg21710060	0.002726422
cg12880090	0.002727717	chr5	63461070	63461120	LARP1	Exon (XM_012178841.2/LARP1, exon 18 of 19)
cg22232807	0.002727977	chr1	83860927	83860977	NTNG1	Exon (XM_012177433.2/NTNG1, exon 7 of 8)
cg20252363	0.002734941	chr22	20860739	20860789	SLF2	Distal Intergenic
cg21552081	0.002740873	chr3	63287774	63287824	BCL11A	Exon (XM_012170922.2/BCL11A, exon 4 of 6)
cg11227540	0.002742187	chr4	68876011	68876061	HOXA3	Intron (XM_015095340.1/HOXA3, intron 2 of 7)
cg14505366	0.002760491	chr22	43366432	43366482	ZRANB1	Exon (XM_012103113.2/ZRANB1, exon 8 of 10)
cg18285835	0.002762264	chr1	15634671	15634721	FOXO6	Distal Intergenic
cg17259905	0.002763938	chr2	54150345	54150395	LOC101110483	Distal Intergenic
cg12279940	0.002779072	chr2	164397898	164397948	LOC105609181	Distal Intergenic
cg26922708	0.002783074
cg18629679	0.002794471	chr1	187195821	187195871	KALRN	Exon (XM_012095930.2/KALRN, exon 52 of 62)
cg26748258	0.002799303	chr23	36012132	36012182	ADCYAP1	Distal Intergenic
cg10055584	0.00279966	chr9	72306812	72306862	LOC105609290	Distal Intergenic
cg18056436	0.002800866	chr13	21774435	21774485	SKIDA1	Intron (XM_015099570.1/SKIDA1, intron 1 of 7)
cg26441980	0.002803296	chr4	69242050	69242100	SKAP2	Intron (XM_015095341.1/SKAP2, intron 10 of 12)
cg25479924	0.002805772	chr8	61019086	61019136	PDE7B	Intron (XM_004011365.3/PDE7B, intron 2 of 12)
cg26917253	0.002814328	chr18	57342959	57343009	FAM181A	Intron (XM_012098967.2/FAM181A, intron 1 of 1)
cg06153489	0.00283321	chr13	12441298	12441348	LOC105610814	Distal Intergenic
cg19404302	0.00283996	chr17	66561000	66561050	MN1	Distal Intergenic
cg00037952	0.002851803	chr22	22480336	22480386	WBP1L	Promoter (<=1kb)
cg18403893	0.002852834	chr18	45696758	45696808	PAX9	Intron (XM_012098838.1/PAX9, intron 4 of 5)
cg09200986	0.002853625	chr5	26503678	26503728	ZNF608	Intron (XM_015095945.1/ZNF608, intron 4 of 9)
cg16490700	0.002856415	chr14	36990418	36990468	LOC105606377	Intron (XR_001435696.1/LOC105606377, intron 2 of 2)
cg09538377	0.002857443	chr1	63753871	63753921	LMO4	Intron (XM_004002167.3/LMO4, intron 2 of 4)
cg23829579	0.002863891	chr2	182457350	182457400	LOC105609881	Distal Intergenic
cg27169779	0.002864927	chr2	136926734	136926784	DYNC1I2	Intron (XM_004004598.2/DYNC1I2, intron 5 of 15)
cg06764333	0.002867336	chr8	58385401	58385451	EYA4	Intron (XM_012182929.2/EYA4, intron 1 of 19)
cg22760542	0.002878705	chr3	97386295	97386345	LOC105612338	Distal Intergenic
cg20125045	0.002879009	chr3	132386291	132386341	LOC101109166	Distal Intergenic
cg26603288	0.002887267	chr1	38219436	38219486	LOC106990797	Distal Intergenic
cg08887457	0.002889112	chr2	206862250	206862300	NRP2	Exon (XM_012143443.2/NRP2, exon 16 of 16)
cg19680012	0.002907991	chr13	71105788	71105838	PTPRT	Intron (XM_015099500.1/PTPRT, intron 3 of 34)
cg26196472	0.002911191
cg16807421	0.002911302	chr1	273332059	273332109	SATB1	Intron (XM_015092727.1/SATB1, intron 8 of 9)
cg18306254	0.002915034	chr5	85350150	85350200	LOC101105819	Distal Intergenic
cg00207813	0.002916329	chr25	31658043	31658093	C25H10orf11	Intron (XM_012105395.2/C25H10orf11, intron 5 of 5)
cg22916962	0.002923331	chr26	31232573	31232623	LOC105607919	Distal Intergenic
cg11235804	0.002924936	chr20	23810008	23810058	PKHD1	Intron (XM_015102755.1/PKHD1, intron 59 of 64)
cg09793883	0.002925082	chr1	67354567	67354617	BARHL2	Distal Intergenic
cg20379577	0.002929158	chr11	10677269	10677319	MED13	Exon (XM_015098470.1/MED13, exon 30 of 30)
cg07639569	0.002942964	chr2	14683259	14683309	LOC105606800	Promoter (9-10kb)
cg22699121	0.002951831	chr26	31291403	31291453	LOC105605231	Intron (XR_001436788.1/LOC105605231, intron 7 of 9)
cg26038591	0.002963019	chr5	89859662	89859712	LOC101121262	Distal Intergenic
cg23018285	0.002966301	chr12	31405997	31406047	AKT3	Distal Intergenic
cg00731079	0.002969158	chr7	64141671	64141721	SAMD4A	Exon (XM_012181684.1/SAMD4A, exon 5 of 15)
cg04095564	0.002976424	chr13	21753999	21754049	SKIDA1	Distal Intergenic
cg26627360	0.00299473	chr2	91400784	91400834	ELAVL2	Exon (XM_012127430.2/ELAVL2, exon 6 of 6)
cg08508126	0.00300108	chr17	54609755	54609805	CUX2	Intron (XM_015101404.1/CUX2, intron 4 of 25)
cg23025540	0.003003098	chr11	58149056	58149106	LOC105606322	Distal Intergenic
cg03964283	0.003014831	chr4	29810190	29810240	SP8	Distal Intergenic
cg13024380	0.003016767	chr1	250983714	250983764	MSL2	Exon (XM_004003317.3/MSL2, exon 2 of 2)
cg17558214	0.003020475	chr4	19120076	19120126	PHF14	Exon (XM_012176410.2/PHF14, exon 15 of 17)
cg26521186	0.00303772	chr12	31220492	31220542	ZBTB18	Exon (XM_015099192.1/ZBTB18, exon 2 of 3)
cg14826942	0.003045167	chr5	44107722	44107772	LOC101104574	Exon (XM_015096050.1/LOC101104574, exon 6 of 9)
cg19602539	0.003054545	chr17	58340745	58340795	MED13L	Intron (XM_015101660.1/MED13L, intron 2 of 30)
cg18468479	0.003061021	chr19	13808977	13809027	CTNNB1	3' UTR
cg15935631	0.003066737	chr2	17197332	17197382	LOC106990178	Distal Intergenic
cg19818696	0.003068269	chr18	9668115	9668165	LOC105603042	Distal Intergenic
cg23418225	0.003070462	chr2	222207828	222207878	TRNAS-GGA	Distal Intergenic
cg27306452	0.003074682	chr14	40066844	40066894	ZNF536	Intron (XM_015100543.1/ZNF536, intron 3 of 9)
cg07937628	0.003076314	chr1	138929651	138929701	TRNAS-GGA	Distal Intergenic
cg05090186	0.003090147	chr12	31222202	31222252	ZBTB18	Intron (XM_015099192.1/ZBTB18, intron 1 of 2)
cg22001114	0.003098891	chr2	57024835	57024885	TRNAF-GAA	Distal Intergenic
cg22047293	0.003099451	chr13	65919060	65919110	NNAT	Exon (XM_004014828.3/NNAT, exon 3 of 4)
cg15537691	0.003102774	chr22	37297296	37297346	LOC105604315	Distal Intergenic
cg18822954	0.003106942	chr3	45068923	45068973	EHBP1	Intron (XM_004005849.3/EHBP1, intron 15 of 25)
cg03904814	0.003107966	chr2	144981879	144981929	FIGN	3' UTR
cg24806294	0.003122072
cg21112359	0.003127292	chr4	69545637	69545687	LOC106991133	Promoter (2-3kb)
cg19568989	0.003136254	chr19	8898365	8898415	LOC105603359	Distal Intergenic
cg26500922	0.003154743	chrX	118242176	118242226	TMEM164	Promoter (<=1kb)
cg05165194	0.003155084	chr1	67354618	67354668	BARHL2	Distal Intergenic
cg14252909	0.003156559	chr2	136629499	136629549	METAP1D	Exon (XM_015093360.1/METAP1D, exon 6 of 12)
cg16941568	0.003160123
cg10214377	0.003167171	chr17	11774822	11774872	LOC101109122	Intron (XM_012097396.1/LOC101109122, intron 4 of 5)
cg01987439	0.003172456	chr5	90336538	90336588	NR2F1	Distal Intergenic
cg00634704	0.003175258	chr9	77794616	77794666	OSR2	3' UTR
cg16731519	0.003176084	chr2	165184046	165184096	LOC105609176	Intron (XR_001434140.1/LOC105609176, intron 2 of 3)
cg24126851	0.003188135
cg24895764	0.003190723	chr4	80404356	80404406	SUGCT	Intron (XR_001040004.2/SUGCT, intron 12 of 15)
cg20341609	0.003192461	chr10	5494216	5494266	PCDH17	Exon (XM_004012040.2/PCDH17, exon 4 of 5)
cg13897126	0.00319248	chr22	21381796	21381846	BTRC	Intron (XM_004020119.3/BTRC, intron 4 of 14)
cg11345132	0.003193407	chr1	74744913	74744963	LOC105615049	Distal Intergenic
cg06841460	0.003194577	chr13	61382542	61382592	DNMT3B	Intron (XM_004014479.3/DNMT3B, intron 20 of 21)
cg06308220	0.00319771	chr7	97992002	97992052	FOXN3	Intron (XM_015096750.1/FOXN3, intron 1 of 7)
cg14556244	0.003203008	chr2	42580437	42580487	PEBP4	Intron (XM_012119233.2/PEBP4, intron 3 of 6)
cg00874125	0.003218652	chr9	61347641	61347691	TRPS1	Promoter (2-3kb)
cg05982880	0.003220313	chr15	74120782	74120832	PHF21A	Exon (XM_012096319.2/PHF21A, exon 8 of 20)
cg21797039	0.003228704	chr23	31816973	31817023	ZNF521	Intron (XM_015103618.1/ZNF521, intron 4 of 5)
cg25991320	0.003230051
cg13733201	0.003232488	chr7	12523021	12523071	RAB11A	Exon (XM_004010248.3/RAB11A, exon 3 of 5)
cg02684031	0.003235321	chr12	41004677	41004727	CASZ1	Exon (XM_015099220.1/CASZ1, exon 10 of 15)
cg01143391	0.003238367	chr12	48155468	48155518	TTC34	Distal Intergenic
cg10788097	0.003246779	chr23	45207795	45207845	SLC14A2	Intron (XM_012103628.2/SLC14A2, intron 2 of 20)
cg14988225	0.003248226	chr3	7920110	7920160	DNM1	Exon (XM_015094164.1/DNM1, exon 13 of 25)
cg10858898	0.003259652	chr11	39917433	39917483	THRA	Exon (NM_001100919.1/THRA, exon 8 of 8)
cg25074420	0.003269294	chr10	69663379	69663429	SOX21	Distal Intergenic
cg08582276	0.003296941	chr20	44506857	44506907	TFAP2A	Distal Intergenic
cg03879772	0.003306156	chr11	37932924	37932974	NFE2L1	Exon (XM_015098735.1/NFE2L1, exon 2 of 7)
cg22305268	0.003310453	chr1	191454793	191454843	HES1	Downstream (1-2kb)
cg11956374	0.003312142	chr1	64064530	64064580	LOC105609236	Distal Intergenic
cg18033417	0.003316737	chr2	232520627	232520677	PDE6D	Exon (XM_004005001.3/PDE6D, exon 4 of 5)
cg11758841	0.003322024	chr15	39731756	39731806	PARVA	Exon (XM_015101014.1/PARVA, exon 8 of 14)
cg02714609	0.003324628	chr2	165334852	165334902	ARHGAP15	Exon (XM_004004720.3/ARHGAP15, exon 12 of 14)
cg19234729	0.003339775	chr11	40117914	40117964	RARA	Intron (XM_012186063.1/RARA, intron 3 of 7)
cg26846067	0.00334138	chr18	57342034	57342084	FAM181A	Intron (XM_012098967.2/FAM181A, intron 1 of 1)
cg01522923	0.003343493	chr3	94513772	94513822	EXOC6B	Exon (XM_012173629.2/EXOC6B, exon 4 of 22)
cg12356120	0.003347243	chr1	250983885	250983935	MSL2	Exon (XM_004003317.3/MSL2, exon 2 of 2)
cg03755582	0.003355629	chr1	67354745	67354795	BARHL2	Distal Intergenic
cg02201246	0.003364968	chr13	12006819	12006869	GATA3	Distal Intergenic
cg05847769	0.003367553	chr7	29758625	29758675	MEIS2	Exon (XM_012181166.1/MEIS2, exon 4 of 13)
cg23446200	0.003373191	chr9	84362985	84363035	RUNX1T1	Distal Intergenic
cg25048586	0.003373321	chr7	73746627	73746677	PLEKHG3	Exon (XM_015096741.1/PLEKHG3, exon 14 of 15)
cg27201505	0.003375856	chr24	3124476	3124526	CREBBP	Exon (XM_015104056.1/CREBBP, exon 3 of 34)
cg20717900	0.003376933	chr20	17936737	17936787	CCNI2	Distal Intergenic
cg06447962	0.003385516	chr3	63193292	63193342	BCL11A	Promoter (4-5kb)
cg06641021	0.003391218	chr12	17611114	17611164	USH2A	Intron (XM_015099153.1/USH2A, intron 19 of 71)
cg03387624	0.003395234	chr23	47076830	47076880	SKOR2	Promoter (2-3kb)
cg23278196	0.003396329
cg22680203	0.00339948	chr23	29667513	29667563	CHST9	Distal Intergenic
cg10637076	0.003409557	chr1	39694657	39694707	CACHD1	Exon (XM_012167056.2/CACHD1, exon 16 of 28)
cg17844121	0.003414572	chr4	54550167	54550217	PPP1R3A	3' UTR
cg17940081	0.003423835	chr20	46122794	46122844	LOC105603879	Promoter (4-5kb)
cg04115989	0.003428051	chr4	81378585	81378635	POU6F2	Exon (XM_015095360.1/POU6F2, exon 9 of 9)
cg05130731	0.003432218	chr4	90681959	90682009	GRM8	Exon (XM_012177078.2/GRM8, exon 10 of 11)
cg11232780	0.003444512	chr8	38334553	38334603	LOC105615867	Distal Intergenic
cg16197002	0.003444624	chr23	24612983	24613033	KLHL14	Exon (XM_015103607.1/KLHL14, exon 4 of 11)
cg18968947	0.00346128	chr22	37043936	37043986	LOC105604311	Distal Intergenic
cg04109263	0.003486418	chr2	57024910	57024960	TRNAF-GAA	Distal Intergenic
cg17856663	0.003490393	chr15	60525757	60525807	ELP4	Intron (XM_004016368.3/ELP4, intron 9 of 9)
cg11785939	0.003497588	chr3	132178373	132178423	HOXC6	3' UTR
cg01908850	0.003508294	chr1	115262243	115262293	LMX1A	Exon (XM_004002718.3/LMX1A, exon 2 of 8)
cg13074528	0.003511928	chr18	10753858	10753908	LOC105603050	Distal Intergenic
cg25528426	0.003514026	chr22	21381704	21381754	BTRC	Intron (XM_004020119.3/BTRC, intron 4 of 14)
cg27534091	0.003517737	chrX	101714319	101714369	GRIA3	Intron (XM_012107365.2/GRIA3, intron 14 of 16)
cg07766377	0.003523167	chr3	217934978	217935028	MPPED1	Distal Intergenic
cg17340094	0.003523321	chr22	37592134	37592184	FAM204A	Distal Intergenic
cg00815545	0.003523337	chr18	60082354	60082404	PAPOLA	Distal Intergenic
cg08249407	0.003524931	chr2	145084798	145084848	FIGN	Distal Intergenic
cg02860346	0.003527119	chr18	45280057	45280107	LOC106991743	Intron (XR_001436095.1/LOC106991743, intron 1 of 2)
cg10149728	0.003529162
cg24160552	0.00353456	chr21	41811172	41811222	ESRRA	Exon (XM_015103167.1/ESRRA, exon 2 of 8)
cg05840882	0.003541131	chr14	52325786	52325836	SYMPK	Exon (XM_015100249.1/SYMPK, exon 22 of 27)
cg18813330	0.003541677	chr8	36707526	36707576	SIM1	Distal Intergenic
cg05820392	0.003543569	chr3	210387768	210387818	TSPAN9	Promoter (<=1kb)
cg05384642	0.00354678	chr18	34824230	34824280	LOC101114141	Distal Intergenic
cg26657133	0.003548148	chr4	50497364	50497414	CTTNBP2	Exon (NM_001195311.1/CTTNBP2, exon 4 of 23)
cg16444337	0.003553063	chr23	47401962	47402012	SMAD2	Distal Intergenic
cg24451908	0.003559015	chr2	183118160	183118210	EN1	Intron (XM_015092820.1/EN1, intron 10 of 10)
cg26155008	0.003562186	chr2	223437718	223437768	PAX3	Intron (XM_015093551.1/PAX3, intron 5 of 9)
cg17373854	0.003570626	chr8	37683565	37683615	FBXL4	Distal Intergenic
cg10091639	0.003576336	chr7	29758583	29758633	MEIS2	Exon (XM_012181166.1/MEIS2, exon 4 of 13)
cg10002997	0.003581879	chr3	169702402	169702452	ANO4	Intron (XM_015094820.1/ANO4, intron 8 of 27)
cg13716164	0.003582382	chr2	84653355	84653405	BNC2	Intron (XM_015093223.1/BNC2, intron 1 of 6)
cg25682023	0.003601312	chr20	44493487	44493537	TFAP2A	Intron (NM_001009745.1/TFAP2A, intron 10 of 15)
cg08272562	0.003625719	chr13	63727281	63727331	MYH7B	Exon (XM_015099843.1/MYH7B, exon 6 of 45)
cg00608633	0.003639419	chr2	82417505	82417555	NFIB	Exon (NM_001267879.1/NFIB, exon 2 of 8)
cg00533774	0.003644608	chr3	69207289	69207339	SPTBN1	Exon (XM_015094382.1/SPTBN1, exon 2 of 36)
cg08796632	0.0036473	chr4	35552870	35552920	SEMA3D	Exon (XM_012176543.2/SEMA3D, exon 12 of 18)
cg09536272	0.003654505	chr2	63216318	63216368	LOC105607842	Distal Intergenic
cg00640255	0.00366128	chr26	32092345	32092395	WHSC1L1	Intron (XM_012105932.1/WHSC1L1, intron 8 of 22)
cg03996297	0.003663463	chr5	3409655	3409705	ATP13A1	Exon (XM_015095560.1/ATP13A1, exon 14 of 28)
cg02082809	0.003668179	chr15	56271685	56271735	LOC101117015	Promoter (2-3kb)
cg17132446	0.003670823	chr4	68876131	68876181	HOXA3	Intron (XM_015095340.1/HOXA3, intron 2 of 7)
cg17212850	0.003672867	chr17	41527763	41527813	GRIA2	Exon (XM_004017290.3/GRIA2, exon 12 of 17)
cg14877464	0.003672891	chr7	8892668	8892718	LOC105615610	Distal Intergenic
cg10107220	0.003680583	chr1	238863398	238863448	LOC105604037	Intron (XR_001433907.1/LOC105604037, intron 1 of 1)
cg22183148	0.003686319	chr3	63193120	63193170	BCL11A	Promoter (4-5kb)
cg15521201	0.003697265
cg22537546	0.003698571	chr24	30372786	30372836	LOC105604756	Distal Intergenic
cg24322955	0.003714574	chr1	103686553	103686603	ZBTB7B	Intron (XM_012182605.1/ZBTB7B, intron 1 of 4)
cg26352755	0.0037185	chr6	14900590	14900640	PITX2	Exon (XM_004009615.2/PITX2, exon 4 of 4)
cg24900201	0.003719349
cg24337458	0.003722161	chr26	31004049	31004099	LOC105605229	Distal Intergenic
cg20275043	0.003723359	chr2	165863844	165863894	ARHGAP15	Intron (XM_004004720.3/ARHGAP15, intron 2 of 13)
cg11475981	0.003727595	chr5	86122593	86122643	LOC105615321	Distal Intergenic
cg09833169	0.00373222	chr3	63204507	63204557	BCL11A	Exon (XM_012170922.2/BCL11A, exon 2 of 6)
cg13324564	0.003732755	chr3	9571563	9571613	MVB12B	Intron (XM_015094187.1/MVB12B, intron 6 of 9)
cg03198237	0.003733232	chr15	72329430	72329480	EXT2	Intron (XM_015101117.1/EXT2, intron 7 of 13)
cg22800590	0.003765349	chr12	67634875	67634925	PROX1	Exon (XM_015099370.1/PROX1, exon 2 of 5)
cg23628275	0.003769494	chr14	52037899	52037949	FOSB	Exon (XM_012190549.2/FOSB, exon 2 of 5)
cg13836052	0.003773038	chr9	41510176	41510226	LOC101112402	Distal Intergenic
cg12348962	0.003773108	chr6	80841543	80841593	EPHA5	Exon (XM_015096523.1/EPHA5, exon 5 of 18)
cg02090160	0.00377349	chr2	136602290	136602340	DLX2	Distal Intergenic
cg23739193	0.003776348	chr5	75093153	75093203	LOC101117162	Distal Intergenic
cg24061023	0.003776435	chr11	27051959	27052009	KDM6B	5' UTR
cg22562422	0.003778632	chr7	47225423	47225473	FOXB1	Promoter (<=1kb)
cg02878597	0.003795631	chr14	17419931	17419981	ZNF423	Intron (XM_015100428.1/ZNF423, intron 5 of 5)
cg14100627	0.003802789	chr2	165862839	165862889	ARHGAP15	Intron (XM_004004720.3/ARHGAP15, intron 2 of 13)
cg15241817	0.003803183	chr22	21444238	21444288	POLL	Distal Intergenic
cg06209665	0.003806428	chr17	62315133	62315183	MSI1	Intron (XM_015101673.1/MSI1, intron 4 of 12)
cg21310266	0.003808058	chr12	18012329	18012379	ESRRG	Intron (XM_004013593.3/ESRRG, intron 5 of 6)
cg18480384	0.003812328	chr7	16739684	16739734	TLE3	Intron (XM_012180859.1/TLE3, intron 9 of 20)
cg26411814	0.003835426	chr15	78988925	78988975	CNTF	Promoter (<=1kb)
cg05927178	0.00384245	chr12	67860664	67860714	TRNAC-GCA	Distal Intergenic
cg07749235	0.003845457	chr7	62840851	62840901	LOC105610719	Distal Intergenic
cg09692427	0.003846407	chr11	6829193	6829243	ANKFN1	Exon (XM_015098439.1/ANKFN1, exon 17 of 17)
cg02368158	0.003850174	chr1	18673542	18673592	ERI3	Intron (XM_012121196.2/ERI3, intron 6 of 7)
cg26253898	0.003852464	chr2	146568801	146568851	GCG	Intron (XM_004004659.2/GCG, intron 1 of 4)
cg25898064	0.003859207	chr9	53014382	53014432	PEX2	Distal Intergenic
cg10153029	0.003867731	chr11	47112541	47112591	TANC2	Exon (XM_015098859.1/TANC2, exon 24 of 28)
cg18459384	0.003869537	chr1	67256066	67256116	BARHL2	Distal Intergenic
cg11275402	0.003873521	chr25	29470830	29470880	ZSWIM8	Exon (XM_012105346.2/ZSWIM8, exon 20 of 27)
cg19912855	0.003873667	chr1	215568322	215568372	LOC105603457	Downstream (1-2kb)
cg19057354	0.003878729	chr12	18243821	18243871	ESRRG	Intron (XM_015099157.1/ESRRG, intron 2 of 7)
cg25602934	0.003882957	chr18	38473238	38473288	LOC106991725	Distal Intergenic
cg01579023	0.003892003	chr13	21773955	21774005	SKIDA1	Exon (XM_015099570.1/SKIDA1, exon 2 of 8)
cg20712449	0.003892144	chr25	17716500	17716550	ARID5B	Intron (XM_004021392.3/ARID5B, intron 2 of 9)
cg17179896	0.003894277	chr24	2275909	2275959	LOC101118752	Exon (XM_015104030.1/LOC101118752, exon 2 of 11)
cg27456541	0.003904338	chr3	216269624	216269674	TEF	Exon (XM_015093768.1/TEF, exon 2 of 4)
cg02434126	0.003912001	chr11	12548382	12548432	MRM1	Distal Intergenic
cg06030456	0.003915694	chr3	6910755	6910805	LOC105607245	Exon (XR_001434248.1/LOC105607245, exon 2 of 2)
cg10486204	0.003933184	chr17	66306357	66306407	LOC101105359	Distal Intergenic
cg16317038	0.003933234	chr1	12527066	12527116	LOC105603749	Promoter (9-10kb)
cg09782540	0.003944937	chr20	44503082	44503132	TFAP2A	Exon (NM_001009745.1/TFAP2A, exon 16 of 16)
cg14883247	0.0039638	chr1	66728605	66728655	ZNF326	Distal Intergenic
cg19450032	0.00396553	chrX	93757324	93757374	FHL1	Exon (XM_015104662.1/FHL1, exon 5 of 7)
cg14652449	0.003965669
cg27216196	0.003966548	chr1	106802497	106802547	KIRREL	Distal Intergenic
cg00767915	0.003972014	chr24	41898790	41898840	LOC105604839	Distal Intergenic
cg15771070	0.003976706	chr1	15671212	15671262	FOXO6	Intron (XM_015091659.1/FOXO6, intron 1 of 10)
cg23418942	0.003981165	chr1	273665816	273665866	LOC105605081	Distal Intergenic
cg04153971	0.003983015	chr15	56100713	56100763	CCDC34	Exon (XM_004016355.3/CCDC34, exon 3 of 6)
cg23643137	0.003983346	chr2	54788525	54788575	LOC101110740	Intron (XM_015093166.1/LOC101110740, intron 4 of 19)
cg17269514	0.003983867	chr18	32923956	32924006	CLK3	Exon (XM_015101988.1/CLK3, exon 3 of 12)
cg11118723	0.003988951	chr12	40978654	40978704	CASZ1	Intron (XM_015099220.1/CASZ1, intron 2 of 14)
cg15242494	0.00398954	chr1	67354674	67354724	BARHL2	Distal Intergenic
cg17572860	0.003993718	chr1	114537702	114537752	PBX1	Intron (XM_012185380.2/PBX1, intron 2 of 9)
cg07036796	0.003997103	chr6	70625617	70625667	SRD5A3	Distal Intergenic
cg01227169	0.004000406	chr2	234303093	234303143	TSSK3	3' UTR
cg24057624	0.004005819	chr7	86383121	86383171	NRXN3	Intron (XR_001041942.1/NRXN3, intron 4 of 20)
cg26137465	0.004015534	chr1	20895083	20895133	MKNK1	Intron (XM_015091954.1/MKNK1, intron 4 of 11)
cg02586638	0.004021316	chr13	12007262	12007312	GATA3	Distal Intergenic
cg00075117	0.004027735	chr1	64636410	64636460	LOC101113557	Distal Intergenic
cg17475770	0.004028436	chr15	45913029	45913079	TRIM3	3' UTR
cg09773031	0.004033064	chr18	56876477	56876527	UNC79	Promoter (<=1kb)
cg27501104	0.004034387	chr2	59588710	59588760	PRUNE2	Intron (XM_012122500.2/PRUNE2, intron 4 of 19)
cg21178109	0.004052818	chr12	50428523	50428573	KAZN	Exon (XM_012187500.2/KAZN, exon 7 of 10)
cg25088877	0.004057199	chr17	66170151	66170201	LOC101105359	Distal Intergenic
cg08439798	0.004058196	chr18	39012518	39012568	PRKD1	Exon (XM_015101999.1/PRKD1, exon 16 of 20)
cg26385817	0.004064953	chr10	5494123	5494173	PCDH17	Exon (XM_004012040.2/PCDH17, exon 4 of 5)
cg26227545	0.004070144	chr14	13649941	13649991	ACSF3	Distal Intergenic
cg21229793	0.004076494	chr22	26318379	26318429	SORCS1	3' UTR
cg22069272	0.004082067	chr10	40057521	40057571	PCDH9	Exon (XM_012184744.2/PCDH9, exon 3 of 4)
cg18659931	0.004086297	chr2	165862846	165862896	ARHGAP15	Intron (XM_004004720.3/ARHGAP15, intron 2 of 13)
cg27112227	0.004089365	chr1	67354876	67354926	BARHL2	Distal Intergenic
cg20680669	0.004096771	chr17	66922569	66922619	MN1	Intron (XM_015101418.1/MN1, intron 12 of 12)
cg01029859	0.004099164	chr3	192091631	192091681	ETNK1	Intron (XM_012175197.1/ETNK1, intron 4 of 7)
cg14899396	0.00409953	chr6	43916430	43916480	DHX15	3' UTR
cg16335529	0.004115084	chr22	19814216	19814266	ENTPD7	Exon (XM_004020101.3/ENTPD7, exon 10 of 13)
cg03214411	0.004115143	chr17	41491011	41491061	GRIA2	Exon (XM_004017287.3/GRIA2, exon 15 of 16)
cg23659896	0.004129336	chr1	24673254	24673304	FAF1	Intron (XM_004001957.3/FAF1, intron 18 of 18)
cg07062661	0.004137147	chr3	213712658	213712708	MAFF	Exon (XM_015093991.1/MAFF, exon 3 of 4)
cg19595637	0.004146297	chr23	31756515	31756565	ZNF521	Intron (XM_015103618.1/ZNF521, intron 2 of 5)
cg15938795	0.004148279	chr1	197660884	197660934	BCL6	Intron (XM_012097363.2/BCL6, intron 1 of 9)
cg08472382	0.004155013	chr5	67826688	67826738	EBF1	Intron (XM_012178873.2/EBF1, intron 6 of 15)
cg24981538	0.004167697	chr2	165623131	165623181	ARHGAP15	Intron (XM_004004720.3/ARHGAP15, intron 6 of 13)
cg27205362	0.00417809	chr16	14229049	14229099	ADAMTS6	Exon (XM_015101273.1/ADAMTS6, exon 13 of 25)
cg19714331	0.004190692	chr17	58340781	58340831	MED13L	Intron (XM_015101660.1/MED13L, intron 2 of 30)
cg15502196	0.004190785	chr18	38562652	38562702	LOC106991725	Distal Intergenic
cg27520705	0.004194851	chr1	73749349	73749399	DPYD	Intron (XM_004002217.3/DPYD, intron 13 of 22)
cg03846926	0.004198176	chr13	21774477	21774527	SKIDA1	Intron (XM_015099570.1/SKIDA1, intron 1 of 7)
cg17454831	0.00420198	chr3	41722406	41722456	MEIS1	Exon (XM_012168162.2/MEIS1, exon 3 of 12)
cg08122075	0.004206814	chr3	10155452	10155502	PBX3	Intron (XM_012162805.2/PBX3, intron 4 of 10)
cg02457016	0.004220969	chr23	56002051	56002101	LOC105604541	Promoter (1-2kb)
cg08163918	0.004222934	chr3	161908352	161908402	NDUFA4L2	3' UTR
cg21758028	0.004226697	chr2	53817801	53817851	LOC101110212	Distal Intergenic
cg27218411	0.004228779	chr12	60625786	60625836	CACNA1E	Exon (XM_015099347.1/CACNA1E, exon 2 of 51)
cg13897219	0.004229951	chr25	30909850	30909900	ZNF503	Promoter (6-7kb)
cg09642911	0.004245091	chr3	154178153	154178203	MSRB3	Exon (XM_012174611.2/MSRB3, exon 2 of 7)
cg04319582	0.004246649	chr1	273332227	273332277	SATB1	Intron (XM_015092727.1/SATB1, intron 8 of 9)
cg25674839	0.004258772	chr1	238391860	238391910	LOC105604023	Distal Intergenic
cg25958141	0.004258962	chr7	14424782	14424832	SKOR1	Distal Intergenic
cg01488040	0.004261827	chr24	23356251	23356301	HS3ST4	Intron (XM_015103895.1/HS3ST4, intron 2 of 2)
cg02321644	0.004274014	chr15	60132058	60132108	LOC101111830	Intron (XM_012096149.2/LOC101111830, intron 7 of 37)
cg27660154	0.004279785	chr14	17510431	17510481	ZNF423	Intron (XM_015100428.1/ZNF423, intron 3 of 5)
cg18147524	0.004284975	chr24	30900484	30900534	LOC105604752	Intron (XR_001024319.2/LOC105604752, intron 1 of 1)
cg11510223	0.004292255	chr26	32185823	32185873	FGFR1	Exon (XM_015104611.1/FGFR1, exon 10 of 20)
cg11002979	0.004294247	chr2	36821506	36821556	CNTFR	Intron (XM_015093062.1/CNTFR, intron 4 of 9)
cg04104673	0.004301682	chr23	54966618	54966668	TCF4	Intron (XM_015103775.1/TCF4, intron 1 of 15)
cg24692246	0.004303944	chr11	39500849	39500899	NEUROD2	Distal Intergenic
cg16242568	0.004310821	chr9	84210839	84210889	TRNAS-AGA	Distal Intergenic
cg23535036	0.004318648	chr2	164955303	164955353	GTDC1	Intron (XM_012138353.2/GTDC1, intron 6 of 10)
cg26163447	0.00433397	chr24	30331886	30331936	LOC105604756	Distal Intergenic
cg20959113	0.004334406	chr25	32164865	32164915	LOC106991576	Intron (XR_001436738.1/LOC106991576, intron 1 of 1)
cg26275174	0.004335534	chr2	69948325	69948375	SMARCA2	Intron (XM_004004345.3/SMARCA2, intron 29 of 34)
cg12351588	0.004341399	chr5	58064297	58064347	ABLIM3	Exon (XM_012178757.2/ABLIM3, exon 10 of 24)
cg12199330	0.004347537	chr3	79214195	79214245	SIX3	Distal Intergenic
cg00035308	0.004348784	chr6	25971811	25971861	TSPAN5	Exon (XM_004009684.3/TSPAN5, exon 5 of 8)
cg05212484	0.004355911	chr2	91400857	91400907	ELAVL2	Exon (XM_012127430.2/ELAVL2, exon 6 of 6)
cg22090192	0.004367366	chr15	74142488	74142538	PHF21A	Intron (XM_012096319.2/PHF21A, intron 7 of 19)
cg23429933	0.004369323	chr1	57966771	57966821	ADGRL2	Intron (XM_012174502.2/ADGRL2, intron 18 of 23)
cg26644063	0.004375993	chr13	11486892	11486942	SFMBT2	Exon (XM_015099536.1/SFMBT2, exon 6 of 19)
cg22423904	0.004384785
cg14426076	0.004393625	chr23	20022458	20022508	CELF4	Exon (XM_015103589.1/CELF4, exon 9 of 11)
cg18695839	0.004401217	chr3	132156555	132156605	HOXC4	Promoter (<=1kb)
cg15741341	0.004411678	chr6	80841320	80841370	EPHA5	Exon (XM_015096523.1/EPHA5, exon 5 of 18)
cg16596397	0.004412342	chr15	43689778	43689828	LMO1	Distal Intergenic
cg02550277	0.004414621	chr8	62346996	62347046	OLIG3	Promoter (<=1kb)
cg24370741	0.004417902	chr3	63564255	63564305	LOC106991019	Distal Intergenic
cg22513691	0.004422968	chr12	40982389	40982439	CASZ1	Intron (XM_015099220.1/CASZ1, intron 2 of 14)
cg06222302	0.004429603	chr25	31435149	31435199	C25H10orf11	Intron (XM_012105395.2/C25H10orf11, intron 2 of 5)
cg12315391	0.004437597	chr1	227374422	227374472	SHOX2	3' UTR
cg20276480	0.004443571	chr14	49098048	49098098	EGLN2	Exon (XM_015100585.1/EGLN2, exon 3 of 6)
cg18637807	0.004461093	chr2	16826385	16826435	LOC105606824	Intron (XR_001026843.2/LOC105606824, intron 1 of 1)
cg16028961	0.004468239	chr5	76338922	76338972	LOC106990422	Intron (XM_015095547.1/LOC106990422, intron 2 of 3)
cg22472903	0.004469212	chr3	24359405	24359455	TRNAC-GCA	Distal Intergenic
cg18149227	0.004472261	chr5	91092130	91092180	KIAA0825	Intron (XM_012178948.1/KIAA0825, intron 7 of 21)
cg10560122	0.00447842	chr5	48257916	48257966	PSD2	Distal Intergenic
cg23643330	0.004479344	chr13	3439787	3439837	JAG1	Promoter (<=1kb)
cg01334830	0.00448784	chr1	200636511	200636561	EPHB3	Distal Intergenic
cg11560032	0.004494371	chr3	51349330	51349380	CTNNA2	Exon (XM_012168973.2/LRRTM1, exon 2 of 3)
cg01019608	0.004503498	chr2	57628309	57628359	TRNAF-GAA	Distal Intergenic
cg10546888	0.004507647	chr3	213913811	213913861	DDX17	Exon (XM_015095019.1/DDX17, exon 7 of 12)
cg22885558	0.00451003	chr1	249275062	249275112	SOX14	Promoter (<=1kb)
cg13828336	0.004511661	chr9	52676608	52676658	ZFHX4	Intron (XM_012183892.2/ZFHX4, intron 4 of 10)
cg10071034	0.00452178	chr5	44107699	44107749	LOC101104574	Exon (XM_015096050.1/LOC101104574, exon 6 of 9)
cg27099226	0.00453846	chr14	52037951	52038001	FOSB	Exon (XM_012190549.2/FOSB, exon 2 of 5)
cg09446914	0.004541005	chr2	199822044	199822094	LOC106990596	Distal Intergenic
cg02500125	0.004548615	chr25	30886490	30886540	LOC105605002	Intron (XR_001024611.2/LOC105605002, intron 3 of 3)
cg17214935	0.004553829	chr2	142449668	142449718	SCN1A	Exon (XM_012135111.2/SCN1A, exon 23 of 28)
cg03230916	0.004555428	chr11	35615295	35615345	CACNA1G	Exon (XM_015098338.1/CACNA1G, exon 20 of 47)
cg05603368	0.004560967	chr2	132860555	132860605	HOXD3	Intron (XM_004004563.3/HOXD3, intron 1 of 4)
cg13249957	0.004563909	chr3	132174521	132174571	HOXC5	Exon (XM_004006281.3/HOXC5, exon 3 of 3)
cg01053290	0.004566219	chr4	53768955	53769005	FOXP2	Intron (XM_012176772.1/FOXP2, intron 14 of 17)
cg08409258	0.004566762
cg17667578	0.004583261	chr2	220413678	220413728	ASIC4	Exon (XM_015092839.1/ASIC4, exon 4 of 12)
cg08971779	0.004617055	chr7	29536550	29536600	MEIS2	Distal Intergenic
cg22488935	0.004618572	chr24	29865410	29865460	LOC105604757	Distal Intergenic
cg22797215	0.004631126	chr17	66560833	66560883	MN1	Distal Intergenic
cg24641737	0.004660066
cg23476887	0.004669049	chr1	18647383	18647433	ERI3	Intron (XM_012121196.2/ERI3, intron 7 of 7)
cg04683187	0.004670637	chr9	39175009	39175059	CHD7	Intron (XM_015097778.1/CHD7, intron 25 of 40)
cg09443851	0.004676445	chr2	144855664	144855714	FIGN	Intron (XM_012135549.2/FIGN, intron 1 of 1)
cg10676571	0.004688884	chr24	29865263	29865313	LOC105604757	Distal Intergenic
cg16404365	0.004689395	chr15	43754325	43754375	LMO1	5' UTR
cg13016214	0.004696733	chr2	164254857	164254907	TRNAC-GCA	Distal Intergenic
cg17045742	0.004718624	chr20	36851070	36851120	ID4	Distal Intergenic
cg10565214	0.004721893	chr2	56854650	56854700	TLE4	Exon (XM_015093168.1/TLE4, exon 2 of 20)
cg07708180	0.004723145	chr2	164456413	164456463	ZEB2	Intron (XM_012138277.2/ZEB2, intron 5 of 14)
cg06807725	0.004732735	chr2	138314373	138314423	MYO3B	Exon (XM_012134146.1/MYO3B, exon 5 of 35)
cg13909487	0.004735012	chr14	18998838	18998888	SALL1	Promoter (<=1kb)
cg20118823	0.004739909	chr5	41306636	41306686	TCF3	Intron (XM_015096028.1/TCF3, intron 16 of 16)
cg01005773	0.00474096	chr3	113734013	113734063	NAV3	Exon (XM_012173972.2V3, exon 18 of 41)
cg03085335	0.004743867	chr21	48018846	48018896	CDKN1C	Distal Intergenic
cg18394218	0.004748915	chr1	46648607	46648657	NEGR1	Exon (XM_012173704.2/NEGR1, exon 7 of 7)
cg09555176	0.004772788	chr22	20860787	20860837	SLF2	Distal Intergenic
cg15436708	0.004774696	chr3	132157386	132157436	HOXC4	Promoter (1-2kb)
cg01061817	0.004785372	chr7	29533970	29534020	MEIS2	Distal Intergenic
cg16736080	0.004786608	chr18	57342822	57342872	FAM181A	Intron (XM_012098967.2/FAM181A, intron 1 of 1)
cg18096355	0.004789055	chr7	28542695	28542745	LOC106991260	Distal Intergenic
cg20319037	0.004794211	chr18	18329615	18329665	NTRK3	Intron (XM_015101882.1/NTRK3, intron 3 of 19)
cg18800972	0.004794467	chr7	13338434	13338484	SMAD6	Intron (XM_004010255.3/SMAD6, intron 3 of 3)
cg07792001	0.004812553	chr15	58089719	58089769	LOC105602327	Distal Intergenic
cg18974826	0.004817388	chr1	114568569	114568619	PBX1	Intron (XM_012185380.2/PBX1, intron 2 of 9)
cg01015974	0.00486262	chr2	164442758	164442808	ZEB2	Intron (XM_012138277.2/ZEB2, intron 4 of 14)
cg15485474	0.004871196	chr11	52995331	52995381	TNRC6C	Exon (XM_012186506.2/TNRC6C, exon 17 of 24)
cg21364266	0.004873587	chr19	45299016	45299066	ERC2	Intron (XM_012099885.2/ERC2, intron 16 of 17)
cg13067886	0.00487584
cg23038681	0.004896229	chr25	29518574	29518624	CAMK2G	Exon (XM_015104453.1/CAMK2G, exon 5 of 25)
cg06538073	0.004905007	chr2	182188753	182188803	CCDC93	Distal Intergenic
cg12938158	0.004907576	chr5	43364921	43364971	JADE2	Promoter (<=1kb)
cg25832403	0.004919229	chr3	64365107	64365157	LOC105612568	Distal Intergenic
cg08915111	0.004924369	chr10	76013626	76013676	ZIC2	Distal Intergenic
cg21811143	0.004941191	chr2	183115262	183115312	EN1	3' UTR
cg25657841	0.004955503	chr6	13158181	13158231	NEUROG2	Promoter (5-6kb)
cg06983110	0.004980516	chr5	13674885	13674935	INSR	Exon (XM_004008549.3/INSR, exon 22 of 22)
cg22457995	0.005004713	chr3	191125272	191125322	SOX5	Intron (XM_015094048.1/SOX5, intron 16 of 20)
cg11898602	0.005007915	chr4	68869911	68869961	HOXA3	Intron (XM_015095340.1/HOXA3, intron 2 of 7)
cg14295283	0.005015862	chr23	30974737	30974787	SS18	Intron (XM_012103456.2/SS18, intron 4 of 10)
cg14691624	0.005019079	chr2	65064069	65064119	TRPM3	5' UTR
cg23844552	0.005029067	chr2	234812773	234812823	ADGRB2	Intron (XM_015092851.1/ADGRB2, intron 2 of 27)
cg06416568	0.005032771	chr10	62726492	62726542	SLITRK5	Exon (XM_015098234.1/SLITRK5, exon 2 of 5)
cg14086518	0.005035131	chr25	29518567	29518617	CAMK2G	Exon (XM_015104453.1/CAMK2G, exon 5 of 25)
cg21718143	0.0050406	chr4	68872018	68872068	HOXA3	Intron (XM_015095340.1/HOXA3, intron 2 of 7)
cg20133115	0.005045927	chr3	197950311	197950361	TRNAR-CCU	Distal Intergenic
cg13651513	0.005060217
cg09432555	0.005070754	chr5	104121172	104121222	FBXL17	Intron (XM_015095711.1/FBXL17, intron 10 of 10)
cg18751668	0.005081843	chr2	136609911	136609961	DLX1	Intron (XM_004004591.3/DLX1, intron 1 of 2)
cg06722343	0.005085457	chr19	22377665	22377715	LOC105603432	Exon (XM_004018314.3/LRRN1, exon 2 of 2)
cg10228206	0.005086348	chr7	16784506	16784556	LOC106991254	Intron (LOC106991254/LOC106991254, intron 2 of 2)
cg02897291	0.005087438	chr12	40919998	40920048	LOC105616526	Intron (XR_001044019.2/LOC105616526, intron 2 of 3)
cg21055442	0.00509088	chr14	41275502	41275552	LOC101116502	Distal Intergenic
cg22527990	0.005093791
cg11073981	0.005095101	chr22	36745639	36745689	EMX2	Distal Intergenic
cg12407254	0.005107189	chr3	13404858	13404908	MRRF	Intron (XM_012163741.2/MRRF, intron 3 of 6)
cg16722379	0.005123136	chr11	58567115	58567165	LOC105616446	Distal Intergenic
cg02023768	0.00512434	chr7	29540502	29540552	MEIS2	3' UTR
cg00883967	0.005127154	chr5	89221376	89221426	LOC101107352	Distal Intergenic
cg22610366	0.005127421	chr1	249275056	249275106	SOX14	Promoter (<=1kb)
cg23087015	0.005130011
cg24383718	0.005135961	chr24	25168960	25169010	KIAA0556	Intron (XM_012104305.2/KIAA0556, intron 5 of 28)
cg06900751	0.005138634	chr1	273332168	273332218	SATB1	Intron (XM_015092727.1/SATB1, intron 8 of 9)
cg10652715	0.005139474	chr22	21238302	21238352	BTRC	Distal Intergenic
cg27061549	0.005142055	chr10	46714277	46714327	DACH1	Intron (XM_012184753.2/DACH1, intron 2 of 11)
cg06633884	0.005143864	chr18	35579407	35579457	NOVA1	Exon (XM_012098747.1/NOVA1, exon 3 of 4)
cg24207053	0.005148895	chr12	40866267	40866317	LOC105616526	Intron (XR_001044019.2/LOC105616526, intron 1 of 3)
cg16762534	0.005151069	chr11	25778769	25778819	RABEP1	Exon (XM_015098590.1/RABEP1, exon 4 of 18)
cg18241155	0.005155522	chr15	56209950	56210000	LGR4	Intron (XM_012096123.1/LGR4, intron 1 of 17)
cg13689075	0.005180128	chr3	212500478	212500528	CACNA1C	Exon (XM_015095005.1/CACNA1C, exon 28 of 52)
cg19466923	0.005189311	chr13	80216761	80216811	TSHZ2	Intron (XM_015099939.1/TSHZ2, intron 1 of 2)
cg03002042	0.00519187	chr3	64838765	64838815	LOC105612568	Intron (XR_001434300.1/LOC105612568, intron 3 of 4)
cg19423145	0.005212825	chr9	60378644	60378694	EIF3H	Intron (XM_004011773.3/EIF3H, intron 3 of 7)
cg06530611	0.005227713	chr8	32437936	32437986	LOC105613327	Distal Intergenic
cg14903956	0.005229576	chr3	200963252	200963302	GRIN2B	Exon (XM_015094923.1/GRIN2B, exon 19 of 19)
cg13078590	0.005244156	chr3	9883158	9883208	TRNAC-ACA	Distal Intergenic
cg11398443	0.005246167	chr2	164476472	164476522	ZEB2	Intron (XM_012138277.2/ZEB2, intron 7 of 14)
cg09568551	0.005252313	chr18	38562715	38562765	LOC106991725	Distal Intergenic
cg08773740	0.005256321	chr2	62017950	62018000	RORB	Distal Intergenic
cg12276027	0.005261338	chr23	54966846	54966896	TCF4	Intron (XM_015103775.1/TCF4, intron 1 of 15)
cg03488359	0.00527515	chr2	36977300	36977350	FAM219A	Exon (XM_015093068.1/FAM219A, exon 2 of 6)
cg17489311	0.005275648	chr20	23828864	23828914	PKHD1	Intron (XM_015102755.1/PKHD1, intron 58 of 64)
cg11436350	0.005277792	chr24	41898642	41898692	LOC105604839	Distal Intergenic
cg05446665	0.005285979	chr4	67499297	67499347	CREB5	Intron (XM_015095332.1/CREB5, intron 5 of 11)
cg22302289	0.005286592	chr22	48091430	48091480	EBF3	Intron (XM_015103504.1/EBF3, intron 7 of 13)
cg09205258	0.005293422	chr11	39612531	39612581	ERBB2	Exon (XM_015098758.1/ERBB2, exon 21 of 28)
cg15774023	0.005294585	chr1	21901673	21901723	LOC105609346	Distal Intergenic
cg20006282	0.005295113	chr3	41720821	41720871	MEIS1	Exon (XM_012168162.2/MEIS1, exon 4 of 12)
cg09102690	0.005303619	chr11	16727642	16727692	ASIC2	Exon (XM_015098503.1/ASIC2, exon 2 of 10)
cg13144536	0.005309218	chr14	37608046	37608096	ZFHX3	Exon (XM_015100188.1/ZFHX3, exon 13 of 15)
cg16957078	0.005312495	chr25	40823083	40823133	LDB3	Intron (XM_004021536.3/LDB3, intron 8 of 13)
cg00320782	0.005318087	chr2	57182974	57183024	TRNAF-GAA	Distal Intergenic
cg07436996	0.005328921	chr2	223458964	223459014	PAX3	Intron (XM_015093551.1/PAX3, intron 5 of 9)
cg22372849	0.005342583
cg05086494	0.005355081	chr22	32719952	32720002	HABP2	Distal Intergenic
cg16177888	0.005363465	chr1	67245111	67245161	BARHL2	Promoter (1-2kb)
cg16550878	0.005367156
cg11524517	0.005368249	chr2	165592671	165592721	ARHGAP15	Intron (XM_004004720.3/ARHGAP15, intron 6 of 13)
cg04474425	0.005369198	chr9	52545952	52546002	ZFHX4	Intron (XM_012183892.2/ZFHX4, intron 1 of 10)
cg14128713	0.005373377	chr8	37966222	37966272	FBXL4	Distal Intergenic
cg06798470	0.005377383	chr6	14556214	14556264	PITX2	Distal Intergenic
cg05487364	0.005384164	chr2	151474199	151474249	TRNAC-GCA	Distal Intergenic
cg01702540	0.00539174	chr3	29167399	29167449	LOC101104727	Distal Intergenic
cg26220938	0.00539751	chr4	8621334	8621384	FZD1	Distal Intergenic
cg01393477	0.005401176	chr9	53655832	53655882	LOC105613955	Distal Intergenic
cg15900573	0.005407761	chr3	135958037	135958087	AQP6	Distal Intergenic
cg12370548	0.005414311	chr3	44997388	44997438	EHBP1	Intron (XM_004005849.3/EHBP1, intron 23 of 25)
cg01096178	0.005416116	chr15	25040653	25040703	LOC106990350	Distal Intergenic
cg00087778	0.005428552	chr17	62104860	62104910	CCDC64	Intron (XR_001021768.2/CCDC64, intron 11 of 11)
cg04513616	0.005438685	chr5	10509262	10509312	LYL1	Downstream (1-2kb)
cg25126226	0.005453076	chr11	12548531	12548581	MRM1	Distal Intergenic
cg02471603	0.005458484	chr11	39466807	39466857	LOC105610166	Exon (LOC105610166/LOC105610166, exon 1 of 1)
cg08146829	0.005462485	chr1	12527185	12527235	LOC105603749	Distal Intergenic
cg25184464	0.005464232	chr18	42183964	42184014	NPAS3	Distal Intergenic
cg05886164	0.005466241	chr2	145120063	145120113	FIGN	Distal Intergenic
cg05798330	0.00547752	chr1	249896992	249897042	LOC105604262	Distal Intergenic
cg23720877	0.005480243	chr17	56603401	56603451	TAOK3	Exon (XM_015101646.1/TAOK3, exon 15 of 21)
cg06570848	0.005481852	chr1	109286337	109286387	KCNJ10	Intron (XM_004002660.3/KCNJ10, intron 1 of 1)
cg09478345	0.005486859	chr1	4795699	4795749	GBX2	Distal Intergenic
cg27629193	0.005499804	chrX	120277897	120277947	TSC22D3	Intron (XM_004022437.3/TSC22D3, intron 1 of 2)
cg23662713	0.005503274	chr18	45279858	45279908	LOC106991743	Intron (XR_001436095.1/LOC106991743, intron 1 of 2)
cg17521136	0.005512909	chr25	30309201	30309251	ADK	Intron (XM_012105377.1/ADK, intron 10 of 10)
cg16473663	0.005521568	chr20	17422786	17422836	C20H6orf223	Distal Intergenic
cg18407591	0.005522589	chr1	67360235	67360285	BARHL2	Distal Intergenic
cg03558754	0.005525605	chr2	15715002	15715052	TRNAW-CCA	Promoter (6-7kb)
cg05822239	0.005529694	chr11	20019907	20019957	TIAF1	Distal Intergenic
cg10336766	0.00553121	chr17	53846826	53846876	ANAPC7	Exon (XR_001021681.2/ANAPC7, exon 10 of 13)
cg20683133	0.005548477	chr8	61358687	61358737	MAP7	Exon (XM_015097425.1/MAP7, exon 4 of 16)
cg04283340	0.005552273	chr2	84592791	84592841	BNC2	Intron (XM_015093225.1/BNC2, intron 2 of 5)
cg23451903	0.005565998	chr2	165334970	165335020	ARHGAP15	Exon (XM_004004720.3/ARHGAP15, exon 12 of 14)
cg09176584	0.005587548	chr14	36990493	36990543	LOC105606377	Intron (XR_001435696.1/LOC105606377, intron 2 of 2)
cg26914546	0.005642364	chr1	215857601	215857651	MECOM	Intron (XM_012099727.1/MECOM, intron 1 of 15)
cg26161880	0.005643132	chr7	8892640	8892690	LOC105615610	Distal Intergenic
cg06484622	0.005644857	chr2	183116133	183116183	EN1	Exon (XM_015092820.1/EN1, exon 11 of 11)
cg01591898	0.005646093	chr3	213796303	213796353	LOC443240	Exon (XM_015095017.1/LOC443240, exon 6 of 9)
cg23018667	0.005659074	chr6	60654563	60654613	TMEM33	Distal Intergenic
cg14411282	0.005662484
cg17296202	0.005666282	chr25	31456982	31457032	C25H10orf11	Intron (XM_012105395.2/C25H10orf11, intron 2 of 5)
cg21562108	0.005670777	chr15	59534191	59534241	LOC105602330	Promoter (<=1kb)
cg22450471	0.00567679	chr15	35669989	35670039	SOX6	Intron (XM_015100742.1/SOX6, intron 6 of 18)
cg21644546	0.005701994	chr21	41813670	41813720	TRMT112	Downstream (<1kb)
cg12709145	0.005709039	chr15	25455627	25455677	CADM1	Intron (XM_004016040.3/CADM1, intron 1 of 9)
cg11087587	0.005717756	chr7	46578867	46578917	RORA	Intron (XM_015096689.1/RORA, intron 3 of 11)
cg13037365	0.005723332	chr16	3832221	3832271	FBXW11	5' UTR
cg17982054	0.00572908	chr9	61617301	61617351	TRPS1	Intron (XM_012183944.2/TRPS1, intron 4 of 5)
cg06571779	0.005730037	chr22	29600566	29600616	ADD3	Exon (XM_004020184.3/ADD3, exon 14 of 15)
cg23037611	0.005732528
cg00042664	0.00573844	chr2	164955405	164955455	GTDC1	Intron (XM_012138353.2/GTDC1, intron 6 of 10)
cg23832187	0.005739611
cg10497423	0.005741641	chr10	11146136	11146186	LOC101122119	Distal Intergenic
cg26915360	0.005741664	chr8	39583168	39583218	MMS22L	Intron (XM_012182736.1/MMS22L, intron 14 of 24)
cg16655751	0.005746295	chr3	191125218	191125268	SOX5	Intron (XM_015094048.1/SOX5, intron 16 of 20)
cg09666235	0.005750541	chr15	36755258	36755308	LOC105602234	Distal Intergenic
cg06682189	0.005764117	chr7	70092944	70092994	SLC38A6	Distal Intergenic
cg15732510	0.005771019	chr22	21432243	21432293	BTRC	Exon (XM_004020119.3/BTRC, exon 14 of 15)
cg20318235	0.005781146	chr12	41011046	41011096	CASZ1	Exon (XM_015099220.1/CASZ1, exon 15 of 15)
cg13932370	0.005808084	chr3	148797180	148797230	PTPRB	Intron (XM_004006460.3/PTPRB, intron 4 of 33)
cg22949164	0.005813352	chr18	64385280	64385330	MIR127	Promoter (<=1kb)
cg26129339	0.00582077
cg13838363	0.005826512	chr1	15634657	15634707	FOXO6	Distal Intergenic
cg06143578	0.005828911	chr2	84419330	84419380	BNC2	Intron (XM_015093230.1/BNC2, intron 2 of 3)
cg20630917	0.005829369	chr2	149430521	149430571	TANC1	Exon (XM_012136386.2/TANC1, exon 14 of 29)
cg27556492	0.005845029	chr12	19570166	19570216	TRNAC-GCA	Distal Intergenic
cg24309602	0.00584618	chr1	103549459	103549509	KCNN3	Exon (XM_004002559.3/KCNN3, exon 1 of 8)
cg18272316	0.005848672	chr19	30195548	30195598	FOXP1	Intron (XM_015102109.1/FOXP1, intron 3 of 17)
cg18987102	0.005854872	chr12	40846261	40846311	LOC105616526	Distal Intergenic
cg10295572	0.005855168	chr4	68871990	68872040	HOXA3	Intron (XM_015095340.1/HOXA3, intron 2 of 7)
cg00470976	0.005856091	chrX	92032929	92032979	LOC101102539	Distal Intergenic
cg07083829	0.005862429	chr23	31816827	31816877	ZNF521	Intron (XM_015103618.1/ZNF521, intron 4 of 5)
cg23526586	0.005870459	chr3	173852611	173852661	C3H12orf75	Distal Intergenic
cg19773906	0.005883102	chr7	76980720	76980770	RAD51B	Intron (XM_015097135.1/RAD51B, intron 8 of 10)
cg21747259	0.00588366	chr3	81886287	81886337	LOC106991055	Promoter (7-8kb)
cg08657650	0.005891587	chr16	17928438	17928488	ZSWIM6	Intron (XM_015101288.1/ZSWIM6, intron 10 of 20)
cg08997359	0.005912563	chr3	45048060	45048110	EHBP1	Exon (XM_004005849.3/EHBP1, exon 17 of 26)
cg19243601	0.005913198	chr15	39419306	39419356	TEAD1	Intron (XM_015101010.1/TEAD1, intron 2 of 12)
cg02652404	0.005915412	chr14	22663560	22663610	IRX5	3' UTR
cg26052964	0.005921012	chr15	30341062	30341112	POU2F3	Intron (XM_015100962.1/POU2F3, intron 3 of 12)
cg07405701	0.005930878	chr18	38656690	38656740	LOC106991725	Distal Intergenic
cg25865150	0.005931443	chrX	22090800	22090850	POLA1	Intron (XM_012106423.2/POLA1, intron 34 of 36)
cg27439236	0.005956063	chr2	16490236	16490286	LOC105606822	Distal Intergenic
cg20761338.1	0.005957819	chr17	53405785	53405835	ANAPC5	Exon (XM_004017352.3/ANAPC5, exon 8 of 17)
cg19445230	0.005964656	chr24	36102249	36102299	GAL3ST4	5' UTR
cg21884905	0.005964863
cg17788462	0.005970105	chr17	7220072	7220122	LRBA	Intron (XM_015101368.1/LRBA, intron 47 of 56)
cg05722568	0.005978053	chr15	35681563	35681613	SOX6	Intron (XM_015100742.1/SOX6, intron 6 of 18)
cg17514200	0.005979939	chr3	44992399	44992449	OTX1	Promoter (2-3kb)
cg25588975	0.006001267	chr24	25168963	25169013	KIAA0556	Intron (XM_012104305.2/KIAA0556, intron 5 of 28)
cg13241746	0.006005713	chr25	24482107	24482157	HNRNPH3	Exon (XM_004021413.3/HNRNPH3, exon 3 of 10)
cg13367380	0.006008753	chr13	63752189	63752239	TRPC4AP	Exon (XM_004014516.3/TRPC4AP, exon 14 of 19)
cg25828170	0.00601372	chr7	13362990	13363040	SMAD6	Intron (XM_004010255.3/SMAD6, intron 3 of 3)
cg08333796	0.006014882
cg07233233	0.006015183	chr12	45248512	45248562	CHD5	Exon (XM_012187945.2/CHD5, exon 40 of 42)
cg26044837	0.006026988	chr18	38786602	38786652	LOC105603169	Distal Intergenic
cg17100154	0.006042788	chr3	207468509	207468559	PIANP	5' UTR
cg23712728	0.006042839	chr24	41874381	41874431	LOC105604839	Distal Intergenic
cg09334482	0.006050876	chr14	36990502	36990552	LOC105606377	Intron (XR_001435696.1/LOC105606377, intron 2 of 2)
cg13923342	0.006075676	chr3	63487348	63487398	LOC106991019	Distal Intergenic
cg01528388	0.006089532	chr15	25714612	25714662	TRNAC-GCA	Distal Intergenic
cg01754290	0.006108157	chr4	54035347	54035397	FOXP2	Exon (XM_012176767.1/FOXP2, exon 2 of 18)
cg14346040	0.006117283	chr11	39921873	39921923	NR1D1	Exon (NM_001131029.1/NR1D1, exon 7 of 8)
cg26959509	0.006119035	chr13	80380800	80380850	LOC105608654	Distal Intergenic
cg20382443	0.006123465	chr1	10821163	10821213	MAP7D1	Exon (XM_015091861.1/MAP7D1, exon 6 of 19)
cg01597940	0.006132535	chr26	31066324	31066374	LOC105605229	Promoter (<=1kb)
cg07808440	0.006137911	chr22	21444252	21444302	POLL	Distal Intergenic
cg15099692	0.006166677	chr10	73818906	73818956	MBNL2	Intron (XM_015098006.1/MBNL2, intron 5 of 9)
cg05714161	0.006168848	chrX	61310144	61310194	NHSL2	Exon (XM_012106901.2/NHSL2, exon 5 of 9)
cg04126539	0.00618058	chr20	18796476	18796526	RUNX2	Intron (XM_015102729.1/RUNX2, intron 8 of 10)
cg04435494	0.006183544	chr2	145117821	145117871	FIGN	Distal Intergenic
cg23208122	0.006202981	chr2	164419248	164419298	ZEB2	Intron (XM_012138277.2/ZEB2, intron 1 of 14)
cg01591012	0.006205762	chr8	39149491	39149541	LOC105611309	Intron (XR_001435020.1/LOC105611309, intron 2 of 4)
cg19379020	0.00620646	chr3	102457100	102457150	INPP4A	3' UTR
cg22284236	0.006207009	chr21	43347468	43347518	SF3B2	Exon (XM_004019689.3/SF3B2, exon 22 of 22)
cg25551677	0.006209979	chrX	37376336	37376386	LOC105605432	Promoter (6-7kb)
cg24357559	0.006223581	chr17	69413853	69413903	SMTN	Intron (XM_015101717.1/SMTN, intron 19 of 20)
cg15056990	0.006224201	chr9	72183404	72183454	LOC105609290	Distal Intergenic
cg05623230	0.006232156	chrX	22248146	22248196	ARX	Intron (XM_015104688.1/ARX, intron 9 of 13)
cg04427333	0.006234874	chr2	59324303	59324353	FOXB2	Promoter (7-8kb)
cg22855949	0.006237181	chr18	38563357	38563407	LOC106991725	Distal Intergenic
cg15764062	0.006241666	chr8	90417596	90417646	DLL1	Promoter (1-2kb)
cg13940625	0.00624434	chr7	66251797	66251847	LOC101114782	Distal Intergenic
cg15185840	0.006245283	chr17	54421281	54421331	CUX2	Intron (XM_015101404.1/CUX2, intron 1 of 25)
cg26548760	0.006251518	chr3	10995554	10995604	OLFML2A	Promoter (6-7kb)
cg22591683	0.006252214	chr1	200513676	200513726	LOC105602901	Distal Intergenic
cg04795810	0.006254965	chr11	58628412	58628462	LOC105616446	Distal Intergenic
cg10146038	0.006272108	chr14	37387883	37387933	LOC105616868	Promoter (1-2kb)
cg02891649	0.006290757	chr4	101049551	101049601	DGKI	Intron (XM_015095118.1/DGKI, intron 8 of 32)
cg14800844	0.006291652	chrX	37376446	37376496	LOC105605432	Promoter (6-7kb)
cg26432184	0.006292115	chr2	152910060	152910110	NR4A2	Distal Intergenic
cg07919628	0.006302238	chr3	190849504	190849554	SOX5	Intron (XM_015094048.1/SOX5, intron 8 of 20)
cg17633606	0.006304889	chr6	17173029	17173079	LEF1	Intron (XM_004009633.3/LEF1, intron 3 of 11)
cg22036407	0.006306294	chr21	45200377	45200427	PPP6R3	Exon (XM_015103223.1/PPP6R3, exon 16 of 23)
cg00101491	0.006317254	chr18	9321600	9321650	LOC101113177	Distal Intergenic
cg27113985	0.006325278	chr3	44660194	44660244	WDPCP	Intron (XM_015094321.1/WDPCP, intron 9 of 15)
cg13519748	0.006339064	chr14	41662607	41662657	LOC105607554	Distal Intergenic
cg26951921	0.006355963	chr20	22413405	22413455	DEFB112	Distal Intergenic
cg13512021	0.006370474	chr13	62783694	62783744	RALY	Intron (XM_004014503.2/RALY, intron 4 of 8)
cg25406034	0.006375377	chr18	9419659	9419709	LOC101113177	Distal Intergenic
cg22457882	0.006378356	chr9	22817256	22817306	ADCY8	Exon (XM_015097656.1/ADCY8, exon 11 of 21)
cg02839060	0.006383195	chr3	9348825	9348875	LMX1B	Distal Intergenic
cg05973305	0.006393007	chr5	84758559	84758609	LOC106991176	Distal Intergenic
cg16236696	0.006393147	chr1	21783196	21783246	FOXD2	Distal Intergenic
cg13208500	0.006413586	chr23	57570572	57570622	NEDD4L	Intron (XM_012103786.2/NEDD4L, intron 5 of 31)
cg16471565	0.006418998	chr2	144069823	144069873	GRB14	Distal Intergenic
cg01452820	0.006421108	chr2	83596035	83596085	CCDC171	Intron (XM_004004388.3/CCDC171, intron 12 of 25)
cg21779576	0.006432341	chr18	44847738	44847788	BRMS1L	Exon (XM_004017898.2/BRMS1L, exon 3 of 10)
cg05174060	0.006439747	chr14	45451092	45451142	KMT2B	Exon (XM_015099954.1/KMT2B, exon 8 of 43)
cg13147417	0.006439787	chr18	38847065	38847115	LOC105603169	Distal Intergenic
cg23691177	0.006441947	chr3	64908833	64908883	LOC105612568	Intron (XR_001434300.1/LOC105612568, intron 3 of 4)
cg24527636	0.006455188	chr2	238658236	238658286	WASF2	Distal Intergenic
cg26602269	0.006458317	chr2	51435300	51435350	PAX5	Exon (XM_012120994.2/PAX5, exon 3 of 9)
cg12310445	0.006482644	chr24	10386831	10386881	TXNDC11	Exon (XM_012104118.2/TXNDC11, exon 5 of 11)
cg24098843	0.006494942
cg12112459	0.006506776	chr5	48616654	48616704	PURA	Promoter (<=1kb)
cg22970598	0.006511486	chr4	93603544	93603594	NRF1	3' UTR
cg09855155	0.006514453	chr5	76513276	76513326	LOC106990422	Intron (XM_015095547.1/LOC106990422, intron 3 of 3)
cg23605887	0.006535021	chr6	93628723	93628773	GK2	Distal Intergenic
cg08668870	0.006536659	chr1	191631871	191631921	HES1	Distal Intergenic
cg08047555	0.006541247	chr5	89697284	89697334	LOC101121262	Distal Intergenic
cg20746421	0.006562562	chr15	29939049	29939099	TRIM29	Distal Intergenic
cg07031236	0.006563388	chr25	28064063	28064113	ANAPC16	Exon (XM_004021449.2/ANAPC16, exon 2 of 4)
cg09313626	0.006563961	chr21	43853744	43853794	RBM14	Exon (XM_015102983.1/RBM14, exon 2 of 5)
cg11531264	0.006570089	chr19	56554077	56554127	PPARG	Intron (XM_015102088.1/PPARG, intron 6 of 7)
cg13224508	0.0065746	chr6	91980078	91980128	CNOT6L	Exon (XM_012180234.2/CNOT6L, exon 7 of 11)
cg15803228	0.006582222	chr13	62219109	62219159	SNTA1	Exon (XM_004014496.3/SNTA1, exon 7 of 8)
cg02864264	0.006584042	chr5	90336403	90336453	NR2F1	Distal Intergenic
cg18560935	0.00658443	chr3	207009639	207009689	CLSTN3	Exon (XM_012175484.2/CLSTN3, exon 12 of 18)
cg21602632	0.00658867	chr25	31663368	31663418	C25H10orf11	Intron (XM_012105395.2/C25H10orf11, intron 5 of 5)
cg25244980	0.006606504	chr3	214804835	214804885	CACNA1I	Intron (XM_015093996.1/CACNA1I, intron 9 of 41)
cg15482199	0.006609569	chr3	132157562	132157612	HOXC4	Promoter (1-2kb)
cg22655206	0.006615275	chr3	65070950	65071000	LOC105612568	Intron (XR_001434300.1/LOC105612568, intron 1 of 4)
cg16680249	0.006618946	chr8	37270775	37270825	PRDM13	Promoter (2-3kb)
cg05396010	0.006620871	chr5	43098440	43098490	TCF7	Intron (XM_012178490.2/TCF7, intron 8 of 8)
cg19544104	0.006631133	chr13	38710913	38710963	CFAP61	Intron (XM_015099664.1/CFAP61, intron 7 of 26)
cg11899185	0.006659251	chr5	10527125	10527175	NFIX	Exon (XM_012177827.1/NFIX, exon 7 of 11)
cg01635604	0.006675708	chr22	21381753	21381803	BTRC	Intron (XM_004020119.3/BTRC, intron 4 of 14)
cg15727533	0.006678746	chr13	62783699	62783749	RALY	Intron (XM_004014503.2/RALY, intron 4 of 8)
cg14241622	0.006679075	chr14	21307641	21307691	AKTIP	Distal Intergenic
cg15702573	0.006681503	chr5	36188783	36188833	NSD1	Exon (XM_012178282.2/NSD1, exon 23 of 23)
cg01327047	0.006684144	chr22	21222817	21222867	LOC105604254	Exon (XR_001436518.1/LOC105604254, exon 4 of 6)
cg22328993	0.006691244	chrX	14854718	14854768	LOC106991958	Distal Intergenic
cg20049845	0.006702519	chr25	31213723	31213773	C25H10orf11	Intron (XM_012105395.2/C25H10orf11, intron 2 of 5)
cg18728528	0.006720566	chr12	40920054	40920104	LOC105616526	Intron (XR_001044019.2/LOC105616526, intron 2 of 3)
cg17008497	0.006731459	chr2	135753736	135753786	RAPGEF4	Exon (XM_012133702.2/RAPGEF4, exon 26 of 26)
cg09420504	0.006733876	chr10	47500174	47500224	BORA	Distal Intergenic
cg07934123	0.006737672	chr26	31258889	31258939	TRNAG-CCC	Distal Intergenic
cg20819309	0.006738485	chr5	90332076	90332126	NR2F1	Exon (XM_012179315.2/NR2F1, exon 5 of 5)
cg05857961	0.006741292	chr3	41718150	41718200	MEIS1	Intron (XM_012168162.2/MEIS1, intron 6 of 11)
cg03454056	0.006743092	chr2	84473747	84473797	BNC2	Intron (XM_015093230.1/BNC2, intron 1 of 3)
cg16178942	0.006756102	chr10	84802068	84802118	ARHGEF7	Exon (XM_015098018.1/ARHGEF7, exon 23 of 23)
cg23025641	0.006761997	chr26	31258912	31258962	TRNAG-CCC	Distal Intergenic
cg04188260	0.006763022	chr12	40725674	40725724	TARDBP	Distal Intergenic
cg17426166	0.006767072	chr1	57291663	57291713	ADGRL2	Distal Intergenic
cg24866378	0.006772149	chr7	42645192	42645242	ZNF609	Distal Intergenic
cg27365266	0.006772537	chr1	214336115	214336165	TNIK	Intron (XM_012099241.2/TNIK, intron 31 of 32)
cg14512779	0.006774349	chrX	92297582	92297632	ZIC3	Distal Intergenic
cg02628072	0.006774942	chr1	64636260	64636310	LOC101113557	Distal Intergenic
cg21016723	0.006788421	chr23	19870594	19870644	CELF4	Distal Intergenic
cg07673667	0.006789102	chr1	249625077	249625127	LOC105604262	Distal Intergenic
cg09337540	0.006793733	chrX	37376386	37376436	LOC105605432	Promoter (6-7kb)
cg08712796	0.006797251	chr8	36707723	36707773	SIM1	Distal Intergenic
cg16447012	0.006797693
cg19301717	0.006804354	chr6	45943385	45943435	TBC1D19	Exon (XM_012179776.2/TBC1D19, exon 22 of 23)
cg00101279	0.006805092
cg21904314	0.006814565	chr3	197486568	197486618	LOC105613112	Distal Intergenic
cg13550191	0.006832328	chr21	30818469	30818519	LOC105604055	Distal Intergenic
cg05061107	0.006834022	chr21	42204406	42204456	PYGM	Promoter (5-6kb)
cg17698896	0.006849379	chr11	6923555	6923605	NOG	Distal Intergenic
cg06242209	0.00685702	chr20	45575822	45575872	TRNAC-ACA	Distal Intergenic
cg19466822	0.00685911	chr18	62847273	62847323	BCL11B	Intron (XM_015101817.1/BCL11B, intron 1 of 7)
cg23684458	0.006879808	chr7	69690427	69690477	SIX1	Distal Intergenic
cg22413784	0.006893941	chr1	176167740	176167790	BOC	Intron (XM_015092446.1/BOC, intron 3 of 21)
cg02062751	0.006902888	chr3	23990858	23990908	MYCN	Distal Intergenic
cg14166279	0.006903755	chr1	18652568	18652618	ERI3	Intron (XM_012121196.2/ERI3, intron 7 of 7)
cg08332206	0.006904427	chr3	197238768	197238818	LOC105613112	Distal Intergenic
cg26457089	0.006906153	chr7	29554205	29554255	MEIS2	Intron (XM_012181166.1/MEIS2, intron 10 of 12)
cg21456069	0.006927403	chr3	97896243	97896293	LOC105612338	Distal Intergenic
cg08639418	0.006928635	chr4	64833339	64833389	CCDC129	Intron (XM_004008240.3/CCDC129, intron 5 of 14)
cg19464162	0.0069394	chr10	59193000	59193050	SLITRK1	Exon (XM_012184837.2/SLITRK1, exon 2 of 2)
cg24732151	0.006953344	chr3	85206594	85206644	SRSF7	Intron (XM_012173447.1/SRSF7, intron 3 of 7)
cg03482823	0.00695971	chr8	25830405	25830455	FYN	Exon (XM_004011197.3/FYN, exon 7 of 13)
cg21479851	0.006964785	chr10	32411067	32411117	GSX1	Promoter (2-3kb)
cg10500926	0.006974356	chr22	21039297	21039347	KAZALD1	Distal Intergenic
cg21057323	0.006977821	chr18	66233826	66233876	CDC42BPB	Exon (XM_015101827.1/CDC42BPB, exon 29 of 37)
cg15876728	0.006987525	chr22	20860785	20860835	SLF2	Distal Intergenic
cg23815914	0.007017407	chr6	91982630	91982680	CNOT6L	Exon (XM_012180234.2/CNOT6L, exon 6 of 11)
cg12196332	0.007023366	chr10	46848819	46848869	DACH1	Intron (XM_012184753.2/DACH1, intron 1 of 11)
cg27235635	0.007027859	chr6	93778920	93778970	GK2	Distal Intergenic
cg26766294	0.007031474
cg19908097	0.007039535	chr2	197504291	197504341	HECW2	Exon (XM_012141142.1/HECW2, exon 8 of 23)
cg19654336	0.007041349	chr7	42645206	42645256	ZNF609	Distal Intergenic
cg21795232	0.007041486	chr8	19693450	19693500	SLC35F1	Exon (XM_012182520.2/SLC35F1, exon 4 of 8)
cg24339363	0.007047116	chr11	39437964	39438014	CDK12	Exon (XM_004012841.3/CDK12, exon 14 of 14)
cg26629129	0.007047382	chr17	59441739	59441789	TBX3	Distal Intergenic
cg14214402	0.007048667	chr4	14257725	14257775	DLX6	Exon (XM_004008202.2/DLX6, exon 3 of 4)
cg26510513	0.007055903	chr8	38707266	38707316	LOC105615867	Distal Intergenic
cg23320654	0.007062221	chr11	61065652	61065702	AXIN2	Promoter (<=1kb)
cg03826688	0.007067376	chr3	197857127	197857177	LMO3	Intron (XM_015094915.1/LMO3, intron 2 of 4)
cg04211440	0.007095798	chr2	82217272	82217322	NFIB	Intron (NM_001267879.1/NFIB, intron 6 of 7)
cg09450031	0.007099848	chr1	120736521	120736571	LOC105609268	Distal Intergenic
cg03710142	0.007114617	chr1	238130304	238130354	LOC105604023	Distal Intergenic
cg00995852	0.007121027
cg22701693	0.007121233	chr2	32748551	32748601	GAS1	Distal Intergenic
cg09355828	0.007123526	chr13	74195289	74195339	SLC12A5	Exon (XM_015099921.1/SLC12A5, exon 9 of 27)
cg24449120	0.007127164	chr1	138929824	138929874	TRNAS-GGA	Distal Intergenic
cg14302366	0.007136992	chr19	44850433	44850483	ERC2	Exon (XM_012099885.2/ERC2, exon 5 of 18)
cg27519177	0.007154523	chr2	183123181	183123231	EN1	Promoter (<=1kb)
cg02206196	0.007155151	chrX	14854660	14854710	LOC106991958	Distal Intergenic
cg08257516	0.007166042	chrX	22241408	22241458	ARX	3' UTR
cg04051488	0.007197065	chr23	17806611	17806661	LOC105604415	Distal Intergenic
cg16540180	0.007225337	chr26	39654154	39654204	LOC106991956	Distal Intergenic
cg12469058	0.007242029	chr7	29536609	29536659	MEIS2	Distal Intergenic
cg19635296	0.007245022	chr1	63756985	63757035	LMO4	Intron (XM_004002167.3/LMO4, intron 2 of 4)
cg04256367	0.007249522	chr22	32892705	32892755	HABP2	Distal Intergenic
cg17708237	0.007263257	chr18	18329623	18329673	NTRK3	Intron (XM_015101882.1/NTRK3, intron 3 of 19)
cg17673775	0.007270466	chr1	238901291	238901341	LOC105604038	Intron (XR_001433908.1/LOC105604038, intron 1 of 2)
cg12620743	0.00727245	chr5	85477616	85477666	LOC101105819	Intron (XR_001040782.2/LOC101105819, intron 1 of 3)
cg10682394	0.007284725	chrX	22383935	22383985	ARX	Distal Intergenic
cg09909555	0.007293698	chr14	43459624	43459674	KCTD15	Distal Intergenic
cg15905994	0.007296094	chr14	36981107	36981157	LOC105606377	Intron (XR_001435696.1/LOC105606377, intron 2 of 2)
cg03064443	0.007342271	chr2	129522229	129522279	ZNF385B	Exon (XM_015093333.1/ZNF385B, exon 6 of 11)
cg00798698	0.007346483	chrX	52341458	52341508	USP27X	Promoter (<=1kb)
cg24475906	0.007348786	chr15	43729237	43729287	LMO1	Distal Intergenic
cg12733826	0.007365977	chr12	67750059	67750109	LOC105616575	Intron (XR_001044145.2/LOC105616575, intron 3 of 3)
cg22551406	0.00736686	chr22	20860749	20860799	SLF2	Distal Intergenic
cg01190601	0.007366902	chr2	213382600	213382650	ERBB4	Intron (XM_004004897.3/ERBB4, intron 1 of 26)
cg27245416	0.007368291	chr2	239281333	239281383	ARID1A	Exon (XM_015093664.1/ARID1A, exon 7 of 13)
cg05280803	0.007371442	chr2	32748392	32748442	GAS1	Distal Intergenic
cg05854536	0.00737375	chr2	200590713	200590763	SATB2	Intron (XM_012141769.2/SATB2, intron 9 of 10)
cg12925881	0.007379909	chr6	45300147	45300197	TRNAH-AUG	Distal Intergenic
cg18611544	0.007384506	chr23	39183312	39183362	EPB41L3	Intron (XM_012103543.2/EPB41L3, intron 12 of 22)
cg22662356	0.007388695	chr1	203695915	203695965	LOC101111339	Distal Intergenic
cg23597056	0.007408998	chr11	39466795	39466845	LOC105610166	Exon (LOC105610166/LOC105610166, exon 1 of 1)
cg04564770	0.007414941	chr12	68230722	68230772	LOC106991472	Distal Intergenic
cg20426932	0.007418053	chr16	71283409	71283459	IRX4	Distal Intergenic
cg23316150	0.007420002	chr2	238731980	238732030	WASF2	Exon (XM_012151049.2/WASF2, exon 3 of 10)
cg08544788	0.007427899	chr21	16777486	16777536	TENM4	Intron (XM_012101703.1/TENM4, intron 32 of 32)
cg17865528	0.007439241	chr5	47513505	47513555	CTNNA1	5' UTR
cg04779597	0.007440403	chr1	235405340	235405390	LOC101119269	3' UTR
cg05968078	0.00745226	chr2	164397819	164397869	LOC105609181	Distal Intergenic
cg13954175	0.00745789	chr2	42673571	42673621	PEBP4	Intron (XM_012119233.2/PEBP4, intron 4 of 6)
cg25166682	0.00747032	chr9	60378760	60378810	EIF3H	Intron (XM_004011773.3/EIF3H, intron 3 of 7)
cg01398149	0.007472601	chr25	32619709	32619759	KCNMA1	Intron (NM_001303455.1/KCNMA1, intron 8 of 25)
cg03564272	0.007476874	chr12	40987653	40987703	CASZ1	Intron (XM_015099220.1/CASZ1, intron 2 of 14)
cg02352577	0.007481236	chr5	89964191	89964241	LOC101121262	Distal Intergenic
cg17031694	0.007489274	chr15	74968176	74968226	C15H11orf49	Promoter (2-3kb)
cg23793099	0.007490471	chr15	50033732	50033782	CLPB	Intron (XM_012096002.1/CLPB, intron 4 of 14)
cg25113128	0.007490751	chr17	58340757	58340807	MED13L	Intron (XM_015101660.1/MED13L, intron 2 of 30)
cg14703363	0.00749387	chr10	46584375	46584425	DACH1	Intron (XM_012184753.2/DACH1, intron 7 of 11)
cg08885656	0.007494281	chrX	53259032	53259082	PORCN	Exon (XM_012106767.1/PORCN, exon 3 of 14)
cg20442942	0.007497001	chr20	24085674	24085724	PKHD1	Intron (XM_015102755.1/PKHD1, intron 34 of 64)
cg21261423	0.00750352	chr1	177249209	177249259	ZBTB20	Intron (XM_015091730.1/ZBTB20, intron 2 of 9)
cg11002854	0.007506118	chr3	97595924	97595974	LOC105612338	Distal Intergenic
cg16017414	0.007509392	chr12	22577799	22577849	LOC101123651	Distal Intergenic
cg04691337	0.007525575	chr7	27736413	27736463	LOC105615667	Distal Intergenic
cg10790806	0.007536155	chr6	58173098	58173148	KLHL5	Exon (XM_004009770.3/KLHL5, exon 1 of 11)
cg00851590	0.007541934	chr15	45724391	45724441	DCHS1	Intron (XM_015101050.1/DCHS1, intron 1 of 25)
cg13329537	0.007542246	chr13	74295095	74295145	CD40	Distal Intergenic
cg25301626	0.007547902	chr5	10516004	10516054	NFIX	Intron (XM_012177827.1/NFIX, intron 10 of 10)
cg20039968	0.007551592	chr1	12571524	12571574	POU3F1	Distal Intergenic
cg19840473	0.007554813	chr3	41479652	41479702	LOC106991047	Exon (XR_001434289.1/LOC106991047, exon 3 of 3)
cg14141896	0.007555409	chr18	33254576	33254626	LOC105603157	Distal Intergenic
cg08152128	0.007564356	chr25	18716516	18716566	EGR2	3' UTR
cg06649236	0.007612088	chr23	17659110	17659160	LOC105604415	Distal Intergenic
cg24888989	0.007618626
cg25361894	0.007621985	chr13	60291228	60291278	REM1	Downstream (1-2kb)
cg23475389	0.007624462	chr5	76092401	76092451	LOC106990422	Distal Intergenic
cg01500797	0.007643584	chr1	193098030	193098080	FGF12	Distal Intergenic
cg08823114	0.00764868	chr21	29111149	29111199	KIRREL3	Intron (XM_015103107.1/KIRREL3, intron 1 of 16)
cg07636145	0.007661585	chr14	23854779	23854829	GNAO1	Intron (XM_004015006.3/GNAO1, intron 2 of 8)
cg27613904	0.007676844	chr16	69597757	69597807	LOC105602652	Distal Intergenic
cg20655169	0.007680808	chrX	118242202	118242252	TMEM164	Promoter (<=1kb)
cg16665095	0.007682252	chr23	31858038	31858088	ZNF521	Intron (XM_015103618.1/ZNF521, intron 4 of 5)
cg11900069	0.007704752	chr1	4795723	4795773	GBX2	Distal Intergenic
cg08356801	0.00771796	chr14	40215140	40215190	ZNF536	Intron (XM_015100543.1/ZNF536, intron 6 of 9)
cg01309929	0.007738431	chr11	26069288	26069338	MINK1	Exon (XM_015098317.1/MINK1, exon 32 of 35)
cg10632395	0.007749376	chr8	62346993	62347043	OLIG3	Promoter (<=1kb)
cg21484547	0.007765294	chr10	32440053	32440103	GSX1	Distal Intergenic
cg18387472	0.007782714	chr22	32628029	32628079	TRNAG-CCC	Distal Intergenic
cg17048874	0.007784453	chr19	45473669	45473719	ERC2	Intron (XM_015102117.1/ERC2, intron 19 of 19)
cg09858514	0.007787334	chr15	19641963	19642013	ZC3H12C	Intron (XM_015100902.1/ZC3H12C, intron 1 of 6)
cg23075174	0.007790512	chr15	41349763	41349813	EIF4G2	Exon (XM_012096549.1/EIF4G2, exon 5 of 23)
cg22531162	0.007792455	chr12	31220397	31220447	ZBTB18	Exon (XM_015099192.1/ZBTB18, exon 2 of 3)
cg09057193	0.007793775	chr2	82417463	82417513	NFIB	Exon (NM_001267879.1/NFIB, exon 2 of 8)
cg26075933	0.00779837	chr7	29554146	29554196	MEIS2	Intron (XM_012181166.1/MEIS2, intron 10 of 12)
cg14955266	0.007798507	chr14	19490834	19490884	LOC105608361	Distal Intergenic
cg25793931	0.007801357	chr22	36745955	36746005	EMX2	Distal Intergenic
cg18356643	0.007826458	chr2	84794012	84794062	BNC2	Intron (XM_015093226.1/BNC2, intron 1 of 5)
cg17806656	0.007827066	chr6	14384593	14384643	LOC101120332	Distal Intergenic
cg09459140	0.007827756	chr8	38652134	38652184	LOC105615867	Intron (XR_001435019.1/LOC105615867, intron 1 of 1)
cg11885593	0.007829717	chr3	41698647	41698697	MEIS1	Intron (XM_012168162.2/MEIS1, intron 6 of 11)
cg05866252	0.007830765	chr1	15671218	15671268	FOXO6	Intron (XM_015091659.1/FOXO6, intron 1 of 10)
cg24889477	0.007833389
cg07680280	0.007833645	chr3	63216421	63216471	BCL11A	Intron (XM_012170922.2/BCL11A, intron 2 of 5)
cg10876821	0.00784989	chr23	45207848	45207898	SLC14A2	Intron (XM_012103628.2/SLC14A2, intron 2 of 20)
cg16468500	0.007867897
cg19305940	0.007876432	chr10	11146056	11146106	LOC101122119	Distal Intergenic
cg12662152	0.007876519	chr4	70100159	70100209	LOC101115788	Distal Intergenic
cg00637411	0.007884772	chr2	37023539	37023589	NUDT2	Intron (XM_012118149.1/NUDT2, intron 1 of 2)
cg09711113	0.007886455	chr11	26679209	26679259	NLGN2	Promoter (<=1kb)
cg22391226	0.00790751	chr10	24992755	24992805	SMAD9	Exon (XM_015098108.1/SMAD9, exon 6 of 7)
cg13775517	0.007909962	chr3	132208338	132208388	HOXC9	Promoter (<=1kb)
cg08716112	0.007913583	chr2	30678694	30678744	PTCH1	Exon (XM_012116602.2/PTCH1, exon 10 of 25)
cg07456773	0.007923081	chr4	68849067	68849117	HOXA9	5' UTR
cg20117682	0.007925631	chr4	29521660	29521710	SP8	Promoter (3-4kb)
cg07003873	0.007928774	chr5	10386961	10387011	CACNA1A	Exon (XM_015095614.1/CACNA1A, exon 35 of 57)
cg15545854	0.007930039	chr1	24354081	24354131	ELAVL4	Intron (XM_012138023.2/ELAVL4, intron 1 of 6)
cg20098951	0.007934057	chr26	32092339	32092389	WHSC1L1	Intron (XM_012105932.1/WHSC1L1, intron 8 of 22)
cg26290885	0.00794151	chr14	33960540	33960590	CBFB	Intron (XM_015100472.1/CBFB, intron 1 of 4)
cg14880506	0.007944115	chr19	45298959	45299009	ERC2	Intron (XM_012099885.2/ERC2, intron 16 of 17)
cg05204560	0.007946482	chr9	53299991	53300041	LOC105613955	Intron (XR_001042742.1/LOC105613955, intron 1 of 2)
cg01267062	0.007956362	chr15	43689839	43689889	LMO1	Distal Intergenic
cg00178703	0.007958828	chr19	56554066	56554116	PPARG	Intron (XM_015102088.1/PPARG, intron 6 of 7)
cg26896009	0.007960757	chr18	57342887	57342937	FAM181A	Intron (XM_012098967.2/FAM181A, intron 1 of 1)
cg00493843	0.00796812	chr1	14283107	14283157	MYCL	Intron (XM_012103090.2/MYCL, intron 1 of 1)
cg06899595	0.007977569	chr13	4878454	4878504	BTBD3	Exon (XM_012188129.2/BTBD3, exon 4 of 5)
cg05757789	0.007986297	chr2	147254217	147254267	TBR1	Exon (XM_015093388.1/TBR1, exon 3 of 11)
cg23407421	0.007989462	chr25	30886450	30886500	LOC105605002	Intron (XR_001024611.2/LOC105605002, intron 3 of 3)
cg19648853	0.007993603	chr18	19938851	19938901	LOC105603092	Distal Intergenic
cg00564054	0.007996161	chr4	69434303	69434353	LOC106991133	Distal Intergenic
cg17759270	0.007997817	chr14	39975490	39975540	ZNF536	Intron (XM_015100543.1/ZNF536, intron 1 of 9)
cg15894685	0.00800664	chr1	271056651	271056701	GALNT15	Exon (XM_004023691.3/GALNT15, exon 6 of 10)
cg21704313	0.008011088	chr2	82372126	82372176	NFIB	Intron (NM_001267879.1/NFIB, intron 2 of 7)
cg14562227	0.008011789	chr12	45248499	45248549	CHD5	Exon (XM_012187945.2/CHD5, exon 40 of 42)
cg25757101	0.008036604	chrX	54166567	54166617	CDK16	Exon (XM_012106805.2/CDK16, exon 9 of 17)
cg03962019	0.008056537	chr1	15634617	15634667	FOXO6	Distal Intergenic
cg10790969	0.008057836	chr7	20222018	20222068	C7H15orf59	Distal Intergenic
cg06370256	0.008070288	chr13	40591623	40591673	FOXA2	Intron (XM_015099455.1/FOXA2, intron 3 of 5)
cg26135304	0.008071472	chr2	213908441	213908491	IKZF2	3' UTR
cg15237862	0.008073827	chr2	133178307	133178357	LOC105609068	Exon (XR_001030784.2/LOC105609068, exon 3 of 3)
cg06956088	0.00807426	chrX	92164650	92164700	ZIC3	Distal Intergenic
cg24707133	0.008087906	chr14	49098644	49098694	EGLN2	Exon (XM_015100585.1/EGLN2, exon 4 of 6)
cg20668096	0.008088901	chr17	7074559	7074609	LRBA	Intron (XM_015101368.1/LRBA, intron 40 of 56)
cg12035862	0.008090626	chr14	53335079	53335129	MEIS3	Exon (XM_012190584.2/MEIS3, exon 7 of 14)
cg04469650	0.008091105	chr1	46648551	46648601	NEGR1	Exon (XM_012173704.2/NEGR1, exon 7 of 7)
cg05328510	0.008100213	chr23	47401931	47401981	SMAD2	Distal Intergenic
cg01450059	0.008127819	chr23	31866343	31866393	ZNF521	Intron (XM_015103618.1/ZNF521, intron 4 of 5)
cg21669515	0.00815103
cg07165689	0.008154406	chr7	47157808	47157858	FOXB1	Distal Intergenic
cg03287707	0.008192076	chr11	29764321	29764371	DNAH9	Distal Intergenic
cg12585954	0.008200095	chr18	61663418	61663468	TRNAS-GGA	Distal Intergenic
cg04747504	0.008203081	chr3	131899019	131899069	GPR84	Distal Intergenic
cg02745872	0.008211159	chr20	15397520	15397570	FOXP4	Promoter (7-8kb)
cg07131533	0.008214124	chr7	2999409	2999459	KCNN2	Exon (XM_004010178.3/KCNN2, exon 5 of 16)
cg22834563	0.008214881	chr23	31507702	31507752	ZNF521	Distal Intergenic
cg10704245	0.008219216	chr24	40420469	40420519	GNA12	Exon (XM_015104264.1/GNA12, exon 5 of 5)
cg14817590	0.008222154	chr14	41284774	41284824	LOC101116502	Distal Intergenic
cg12459391	0.008225626	chr20	23638814	23638864	LOC106991807	Distal Intergenic
cg22878382	0.008236305	chr25	30909851	30909901	ZNF503	Promoter (6-7kb)
cg21223631	0.0082453	chr1	177555476	177555526	LOC105602007	Intron (XR_001020604.2/LOC105602007, intron 5 of 6)
cg24430580	0.008274554
cg14596661	0.008280345	chr13	79015850	79015900	SALL4	Distal Intergenic
cg04397133	0.008287747	chr11	8028517	8028567	MSI2	Exon (XM_015098295.1/MSI2, exon 13 of 14)
cg03746968	0.008294006	chr1	238889630	238889680	LOC105604038	Promoter (9-10kb)
cg20761338.2	0.008307302	chr17	53405735	53405785	ANAPC5	Exon (XM_004017352.3/ANAPC5, exon 8 of 17)
cg01328691	0.008319773	chr1	31598946	31598996	DAB1	5' UTR
cg03484289	0.008320118	chr1	170649824	170649874	BBX	Exon (XM_015092421.1/BBX, exon 5 of 18)
cg06468945	0.008323671	chr11	11454847	11454897	BCAS3	Intron (XM_012185238.1/BCAS3, intron 23 of 24)
cg16369687	0.008338929	chr7	66239420	66239470	OTX2	Distal Intergenic
cg25718857	0.008344079	chr9	50868989	50869039	PI15	Promoter (<=1kb)
cg23108415	0.008347407	chr1	273096882	273096932	SATB1	Distal Intergenic
cg14944600	0.008349307	chr15	24192698	24192748	ZBTB16	Intron (XM_012096530.2/ZBTB16, intron 5 of 7)
cg22592261	0.008349784	chr5	104121194	104121244	FBXL17	Intron (XM_015095711.1/FBXL17, intron 10 of 10)
cg17915315	0.008360922	chr3	13395309	13395359	MRRF	Intron (XM_012163741.2/MRRF, intron 4 of 6)
cg18720066	0.008363161	chr8	30901717	30901767	PRDM1	Intron (XM_012182707.2/PRDM1, intron 3 of 5)
cg04584281	0.008373335	chr1	24436933	24436983	ELAVL4	Intron (XM_012138023.2/ELAVL4, intron 5 of 6)
cg22211710	0.008392242	chr16	14163000	14163050	ADAMTS6	Intron (XM_015101273.1/ADAMTS6, intron 8 of 24)
cg08538032	0.008393102	chr1	24351934	24351984	ELAVL4	Intron (XM_012138023.2/ELAVL4, intron 1 of 6)
cg23230336	0.008426504	chr1	27883059	27883109	GLIS1	Distal Intergenic
[truncated: 2,695 more rows]
